# Supplementary material for: REST/NRSF preserves muscle stem cell identity and survival by repressing alternate cell fates
Source: Research Square preprint supplement (doi:10.21203/rs.3.rs-4396883/v1), 2024-05-30
Supplement: Supplementary file 1 [file 1ca675c07110afa10fdb5919.xlsx]

## Sheet: Sheet1
List of genes that are common between the DEG of MuSCs vs Myoblasts and WT MuSCs vs REST-cKO MuSCs
Ace
Adamts4
Adm
Agtr2
Ap3b2
Aplp1
Asphd1
Atp1a3
Atp6v1b2
Bag1
Bdnf
Bsn
C1qtnf2
C1qtnf3
Cacna1h
Cacng5
Cadm1
Ccdc80
Ccdc96
Cd200
Cd40
Cdh6
Cdkn1c
Chn2
Clvs1
Cnr1
Col6a6
Cplx2
Cpne4
Cxcl10
Ddx25
Disp2
Dner
Eepd1
Efcab6
Elavl2
Entpd2
Epor
Fam234b
Fgf12
Frmd4b
Fxyd6
Gdap1
Gdap1l1
Gnptg
Gpr19
Gprin1
Gyg
Htra1
Igf1
Jak3
Jph3
Kcnb1
Kcnc1
Kcnh6
Kcnip3
Krt28
Lrp11
Mapk8ip2
2024-03-11
Mdk
Meis3
Mmp24
Nfasc
Nfkbid
Nrxn1
Ntsr2
Ogdhl
Pcsk1
Pcsk2
Pgbd5
Phf21b
Phlda1
Pipox
Plxnb2
Pnma2
Pou3f2
Ptgfr
Ptprn
Ptprn2
Rab3d
Rab4a
Rgs7
Rhbdl3
Rims2
Rundc3a
Sarm1
Scamp5
Scg3
Scg5
Sez6
Slc35g2
Slc8a3
Smpd3
Snhg11
Spire2
Spp1
Srrm4
Sult4a1
Svop
Syn1
Syp
Syt14
Tmem106a
Tmem151a
Tmem198
Tmem200a
Tmem38b
Tspan17
Ttyh1
Unc13a
Unc79
Unc80
Vstm2a
Vtn
Xkr6
Yif1a
Zfp300
Zkscan2
