# Supplementary material for: REST/NRSF preserves muscle stem cell identity and survival by repressing alternate cell fates
Source: Research Square preprint supplement (doi:10.21203/rs.3.rs-4396883/v1), 2024-05-30
Supplement: Supplementary file 2 [file 20ca776866c013a5367ff1ec.xlsx]

## Sheet: list DEG in MuSC(significant)
List of Differentially expressed genes between WT and REST-cKO Muscle Stem Cells (Only Significant: absolute log2FC >1, p-adj<0.05)
id	gene_symbol	log_FC	edger.p.value	edger.adj.p.value	WT1_musc_REST_RNASeq.norm	WT2_musc_REST_RNASeq.norm	WT3_musc_REST_RNASeq.norm	KO1_musc_REST_RNASeq.norm	KO2_musc_REST_RNASeq.norm	KO3_musc_REST_RNASeq.norm	WT1_musc_REST_RNASeq.raw	WT2_musc_REST_RNASeq.raw	WT3_musc_REST_RNASeq.raw	KO1_musc_REST_RNASeq.raw	KO2_musc_REST_RNASeq.raw	KO3_musc_REST_RNASeq.raw
ENSMUSG00000021194	Chga	9.973	7.7e-143	1.5e-138	8	1	2	3782	4184	3967	9	1	2	3598	3946	3955
ENSMUSG00000027273	Snap25	11.381	4.1e-119	3.9e-115	2	0	0	1837	2213	2075	2	0	0	1747	2087	2069
ENSMUSG00000033316	Galnt9	8.364	3e-53	9.8e-50	0	7	0	742	746	864	0	7	0	706	704	861
ENSMUSG00000027350	Chgb	7.48	1.5e-52	4.2e-49	7	0	7	822	1055	758	8	0	7	782	995	756
ENSMUSG00000029121	Crmp1	6.479	4.2e-10	1.2e-07	0	33	0	1098	818	1007	0	33	0	1044	771	1004
ENSMUSG00000026204	Ptprn	12.03	1.2e-50	2.8e-47	0	0	0	553	506	507	0	0	0	526	477	506
ENSMUSG00000019796	Lrp11	5.225	2.4e-43	4.2e-40	25	49	23	1423	1124	1114	28	50	23	1354	1060	1111
ENSMUSG00000027581	Stmn3	7.075	2.1e-26	1.8e-23	0	13	0	596	517	641	0	13	0	567	488	639
ENSMUSG00000006575	Rundc3a	4.22	1e-14	5.4e-12	14	119	118	1626	1518	1540	16	121	118	1547	1432	1536
ENSMUSG00000029712	Actl6b	9.16	3.9e-49	7.4e-46	2	0	1	487	590	786	2	0	1	463	556	784
ENSMUSG00000062252	Lhfpl5	11.468	3.8e-38	6.1e-35	0	0	0	336	335	389	0	0	0	320	316	388
ENSMUSG00000033676	Gabrb3	7.936	1.3e-37	1.9e-34	2	3	0	414	379	475	2	3	0	394	357	474
ENSMUSG00000025777	Gdap1	11.434	4.3e-37	5.9e-34	0	0	0	344	388	304	0	0	0	327	366	303
ENSMUSG00000042750	Bex2	4.473	3.8e-28	3.6e-25	20	60	61	1079	1086	965	22	61	61	1026	1024	962
ENSMUSG00000071234	Syndig1l	8.367	7.3e-86	4.7e-82	4	6	8	1821	2544	1496	4	6	8	1732	2399	1492
ENSMUSG00000034336	Ina	11.284	7.3e-33	8.8e-30	0	0	0	307	391	236	0	0	0	292	369	235
ENSMUSG00000039714	Cplx3	8.655	1.4e-76	6.9e-73	14	0	9	3268	3973	2151	15	0	9	3109	3747	2145
ENSMUSG00000019146	Cacng2	11.197	3e-32	3.4e-29	0	0	0	346	286	247	0	0	0	329	270	246
ENSMUSG00000017943	Gdap1l1	4.143	1.1e-08	2.4e-06	3	104	70	1067	1126	937	3	106	70	1015	1062	934
ENSMUSG00000033615	Cplx1	9.362	3.5e-31	3.8e-28	0	0	1	341	291	250	0	0	1	324	274	249
ENSMUSG00000050711	Scg2	7.518	1.4e-13	6.6e-11	55	0	4	2475	4344	4045	60	0	4	2354	4097	4033
ENSMUSG00000055567	Unc80	11.024	4.6e-29	4.6e-26	0	0	0	323	247	210	0	0	0	307	233	209
ENSMUSG00000004113	Cacna1b	5.657	8.2e-23	6.3e-20	9	17	1	406	532	437	10	17	1	386	502	436
ENSMUSG00000031285	Dcx	2.842	1.6e-08	3.5e-06	86	570	626	3015	3332	2848	95	579	627	2868	3142	2840
ENSMUSG00000042532	Golga7b	8.429	2.3e-27	2e-24	2	0	0	228	248	312	2	0	0	217	234	311
ENSMUSG00000032181	Scg3	6.834	6.4e-12	2.2e-09	37	0	1	1771	988	1585	40	0	1	1685	932	1580
ENSMUSG00000032641	Gpr19	3.136	7.7e-25	6.2e-22	155	304	182	1998	1958	1674	170	309	182	1901	1847	1669
ENSMUSG00000033981	Gria2	10.86	1.3e-56	5e-53	0	1	0	868	536	1083	0	1	0	826	505	1080
ENSMUSG00000027419	Pcsk2	5.845	4.6e-22	3.4e-19	1	13	6	388	294	459	1	13	6	369	277	458
ENSMUSG00000038916	Soga3	4.077	2.3e-09	5.7e-07	4	42	91	819	723	768	4	43	91	779	682	766
ENSMUSG00000030683	Sez6l2	9.277	5.3e-28	4.8e-25	0	1	0	186	332	312	0	1	0	177	313	311
ENSMUSG00000048978	Nrsn1	7.491	6.2e-10	1.7e-07	46	0	0	1966	2598	3734	50	0	0	1870	2450	3723
ENSMUSG00000022619	Mapk8ip2	4.582	3e-12	1.1e-09	22	32	1	431	376	505	24	32	1	410	355	504
ENSMUSG00000000632	Sez6	10.391	5.6e-21	4e-18	0	0	0	145	136	222	0	0	0	138	128	221
ENSMUSG00000024109	Nrxn1	12.52	3.2e-50	6.9e-47	0	0	0	415	950	834	0	0	0	395	896	832
ENSMUSG00000029054	Gabrd	8.085	3.9e-33	5e-30	0	5	0	321	639	454	0	5	0	305	603	453
ENSMUSG00000021198	Unc79	8.501	3.6e-20	2.5e-17	0	1	0	175	139	171	0	1	0	166	131	171
ENSMUSG00000028222	Calb1	6.121	2.2e-18	1.4e-15	0	5	5	190	314	200	0	5	5	181	296	199
ENSMUSG00000023473	Celsr3	6.21	1.2e-13	5.8e-11	0	0	8	145	261	201	0	0	8	138	246	200
ENSMUSG00000049265	Kcnk3	5.304	1.3e-09	3.5e-07	1	0	17	210	227	277	1	0	17	200	214	276
ENSMUSG00000069814	E130309D14Rik	5.625	1.5e-13	6.8e-11	0	2	10	193	178	227	0	2	10	184	168	226
ENSMUSG00000033061	Resp18	9.922	3.6e-17	2.2e-14	0	0	0	101	115	147	0	0	0	96	108	147
ENSMUSG00000015829	Tnr	7.933	1.6e-19	1e-16	0	2	0	125	181	257	0	2	0	119	171	256
ENSMUSG00000040373	Cacng5	4.463	7.7e-10	2.1e-07	0	23	15	301	263	269	0	23	15	286	248	268
ENSMUSG00000039860	Srrm3	9.845	6.3e-17	3.7e-14	0	0	0	104	115	125	0	0	0	99	108	125
ENSMUSG00000040035	Disp2	5.67	4.8e-11	1.6e-08	10	0	0	198	170	175	11	0	0	188	160	174
ENSMUSG00000028137	Celf3	5.005	2.1e-14	1.1e-11	3	4	13	171	252	214	3	4	13	163	238	213
ENSMUSG00000086605	Gm14290	5.128	1.1e-08	2.4e-06	1	0	16	156	232	210	1	0	16	148	219	209
ENSMUSG00000025867	Cplx2	2.714	8.1e-18	5e-15	123	127	110	672	908	782	135	129	110	639	856	780
ENSMUSG00000037386	Rims2	9.616	5.8e-15	3.2e-12	0	0	0	82	110	101	0	0	0	78	104	101
ENSMUSG00000023236	Scg5	3.57	6.8e-13	2.9e-10	14	28	48	369	296	405	16	28	48	351	279	404
ENSMUSG00000042763	Maneal	4.621	4.1e-08	8.2e-06	1	2	22	243	176	197	1	2	22	231	166	196
ENSMUSG00000085151	1110018N20Rik	5.345	8.9e-13	3.7e-10	6	0	5	129	209	142	7	0	5	123	197	142
ENSMUSG00000023033	Scn8a	4.565	2.6e-14	1.3e-11	5	9	20	324	318	174	6	9	20	308	300	173
ENSMUSG00000050751	Pgbd5	9.47	3.5e-13	1.5e-10	0	0	0	101	110	54	0	0	0	96	104	54
ENSMUSG00000056158	Car10	9.419	2.5e-13	1.1e-10	0	0	0	76	70	110	0	0	0	72	66	110
ENSMUSG00000036913	Trim67	6.642	1.4e-12	5.4e-10	3	0	0	96	139	87	3	0	0	91	131	87
ENSMUSG00000016200	Syt14	3.398	2.3e-12	8.7e-10	15	35	43	316	383	291	17	36	43	301	361	290
ENSMUSG00000024112	Cacna1h	3.856	9.4e-09	2.1e-06	6	7	36	205	294	216	7	7	36	195	277	215
ENSMUSG00000006651	Aplp1	2.915	1.2e-12	4.8e-10	45	56	78	562	337	455	50	57	78	535	318	454
ENSMUSG00000037428	Vgf	9.282	1.2e-12	4.8e-10	0	0	0	67	93	72	0	0	0	64	88	72
ENSMUSG00000050556	Kcnb1	4.391	6.9e-10	1.9e-07	8	15	1	181	192	138	9	15	1	172	181	138
ENSMUSG00000048482	Bdnf	2.551	1.3e-10	4.3e-08	158	73	77	715	622	467	173	74	77	680	587	466
ENSMUSG00000020591	Ntsr2	3.977	2.7e-07	4.8e-05	6	75	7	565	528	300	7	76	7	537	498	299
ENSMUSG00000030064	Frmd4b	-2.415	3.4e-10	1e-07	651	725	543	64	134	161	715	736	544	61	126	161
ENSMUSG00000071341	Egr4	6.063	3e-11	1e-08	1	3	0	76	113	93	1	3	0	72	107	93
ENSMUSG00000032297	Celf6	4.729	2.9e-06	0.00046	15	0	0	131	158	112	16	0	0	125	149	112
ENSMUSG00000001864	Aif1l	-1.999	2.2e-08	4.7e-06	1093	1097	954	192	169	425	1201	1114	956	183	159	424
ENSMUSG00000055069	Rab39	5.58	2.1e-09	5.4e-07	6	0	0	84	87	116	6	0	0	80	82	116
ENSMUSG00000051703	Tmem198	4.824	2.2e-08	4.7e-06	0	10	2	118	128	96	0	10	2	112	121	96
ENSMUSG00000056553	Ptprn2	9.44	1.8e-12	7e-10	0	0	0	46	127	86	0	0	0	44	120	86
ENSMUSG00000061451	Tmem151a	9.426	1.9e-12	7e-10	0	0	0	78	129	50	0	0	0	74	122	50
ENSMUSG00000069227	Gprin1	5.273	7.9e-09	1.8e-06	0	1	6	88	72	118	0	1	6	84	68	118
ENSMUSG00000022054	Nefm	5.177	1.9e-07	3.6e-05	7	0	0	133	85	65	8	0	0	127	80	65
ENSMUSG00000030790	Adm	2.2	2.3e-10	7.2e-08	189	515	329	1647	1898	1206	208	523	330	1567	1790	1202
ENSMUSG00000028785	Hpca	4.225	1.6e-06	0.00028	17	3	0	137	116	120	18	3	0	130	109	120
ENSMUSG00000004110	Cacna1e	3.275	6e-05	0.0071	0	33	28	206	176	205	0	33	28	196	166	204
ENSMUSG00000042751	Nmnat2	2.094	2.7e-08	5.6e-06	79	155	204	615	574	679	87	157	204	585	541	677
ENSMUSG00000102331	Gm19938	7.069	2.6e-09	6.3e-07	0	1	0	39	60	80	0	1	0	37	57	80
ENSMUSG00000104017	Gm37363	4.777	1.8e-07	3.5e-05	9	0	1	83	104	105	10	0	1	79	98	105
ENSMUSG00000050132	Sarm1	2.579	4.4e-10	1.3e-07	55	65	56	429	255	367	60	66	56	408	240	366
ENSMUSG00000022441	Efcab6	3.079	1.1e-09	2.9e-07	20	38	21	228	231	214	22	39	21	217	218	213
ENSMUSG00000022269	2024-03-11	8.704	1.6e-09	4.1e-07	0	0	0	44	43	68	0	0	0	42	41	68
ENSMUSG00000009214	Tmem8c	-1.605	1.1e-06	0.00019	1917	2392	2396	392	688	1123	2107	2429	2400	373	649	1120
ENSMUSG00000062444	Ap3b2	1.577	4.7e-10	1.4e-07	449	515	560	1345	1812	1392	494	523	561	1279	1709	1388
ENSMUSG00000017344	Vtn	1.567	3.1e-05	0.004	511	2104	1508	3805	4360	4049	562	2137	1510	3619	4112	4037
ENSMUSG00000030757	Zkscan2	9.571	2.6e-12	9.6e-10	0	0	0	36	128	120	0	0	0	34	121	120
ENSMUSG00000026527	Rgs7	2.786	2.5e-07	4.6e-05	19	63	26	262	289	196	21	64	26	249	273	195
ENSMUSG00000069072	Slc7a14	8.847	1.3e-09	3.4e-07	0	0	0	38	90	44	0	0	0	36	85	44
ENSMUSG00000048015	Neurod4	10.306	5.2e-16	2.9e-13	0	0	0	186	53	235	0	0	0	177	50	234
ENSMUSG00000036766	Dner	8.544	9e-09	2.1e-06	0	0	0	33	47	60	0	0	0	31	44	60
ENSMUSG00000026459	Myog	-1.644	1.3e-07	2.5e-05	11272	11003	8154	1706	3533	4498	12389	11173	8167	1623	3332	4485
ENSMUSG00000101840	Gm28294	8.964	5.5e-10	1.6e-07	0	0	0	100	47	40	0	0	0	95	44	40
ENSMUSG00000037217	Syn1	4.833	2e-07	3.8e-05	2	0	6	78	56	97	2	0	6	74	53	97
ENSMUSG00000019139	Isyna1	-2.287	1.4e-05	0.0019	435	335	363	40	39	152	478	340	364	38	37	152
ENSMUSG00000091636	A330050F15Rik	8.81	2.2e-09	5.4e-07	0	0	0	33	88	47	0	0	0	31	83	47
ENSMUSG00000029019	Nppb	8.478	1.9e-08	4.2e-06	0	0	0	29	45	59	0	0	0	28	42	59
ENSMUSG00000035521	Gnptg	1.411	2.7e-06	0.00043	393	808	914	1754	1971	1895	432	820	915	1668	1859	1889
ENSMUSG00000032564	Cpne4	8.473	2.4e-08	5.1e-06	0	0	0	26	57	49	0	0	0	25	54	49
ENSMUSG00000092375	A730060N03Rik	8.475	3.1e-08	6.3e-06	0	0	0	66	28	39	0	0	0	63	26	39
ENSMUSG00000046204	Pnma2	9.182	2.1e-10	6.6e-08	0	0	0	85	28	104	0	0	0	81	26	104
ENSMUSG00000063919	Srrm4	3.151	0.00047	0.04	0	39	13	101	182	184	0	40	13	96	172	183
ENSMUSG00000026805	Barhl1	4.281	2.8e-06	0.00045	0	3	10	59	93	103	0	3	10	56	88	103
ENSMUSG00000035067	Xkr6	3.318	1.4e-06	0.00024	11	5	25	104	121	185	12	5	25	99	114	184
ENSMUSG00000096606	Gm4980	2.039	7.4e-06	0.0011	57	187	83	468	343	535	63	190	83	445	323	533
ENSMUSG00000048330	Ric3	3.949	3.6e-14	1.8e-11	25	16	58	382	406	746	28	16	58	363	383	744
ENSMUSG00000019528	Gyg	-1.936	3e-08	6.1e-06	459	543	591	100	146	169	504	551	592	95	138	169
ENSMUSG00000039809	Gabbr2	4.739	2.7e-07	4.9e-05	6	2	0	64	55	92	6	2	0	61	52	92
ENSMUSG00000017692	Rhbdl3	1.935	7.7e-09	1.8e-06	117	141	141	563	508	454	129	143	141	536	479	453
ENSMUSG00000056069	Fam105a	3.009	1.5e-11	5e-09	91	37	116	617	897	454	100	38	116	587	846	453
ENSMUSG00000021364	Elovl2	6.078	2e-07	3.8e-05	0	0	2	37	38	81	0	0	2	35	36	81
ENSMUSG00000027612	Mmp24	2.388	8.5e-06	0.0012	64	17	76	224	303	293	70	17	76	213	286	292
ENSMUSG00000020053	Igf1	-1.065	1.9e-06	0.00032	19340	16570	21972	7426	10249	9995	21257	16827	22007	7064	9666	9966
ENSMUSG00000086171	Pcsk2os1	5.049	6.9e-06	0.001	0	5	0	66	30	77	0	5	0	63	28	77
ENSMUSG00000061576	Dpp6	2.795	0.0006	0.048	52	1	23	193	134	203	57	1	23	184	126	202
ENSMUSG00000006205	Htra1	1.21	1.1e-07	2.1e-05	935	1248	1180	2842	2479	2459	1028	1267	1182	2703	2338	2452
ENSMUSG00000050357	Rltpr	5.216	4.4e-06	0.00068	0	0	4	45	82	32	0	0	4	43	77	32
ENSMUSG00000097974	Gm10605	1.98	6.9e-05	0.0078	58	327	122	569	611	820	64	332	122	541	576	818
ENSMUSG00000032589	Bsn	3.344	6.4e-06	0.00096	5	19	4	84	95	109	6	19	4	80	90	109
ENSMUSG00000037996	Slc24a2	3.334	2.2e-05	0.003	29	19	1	243	128	126	32	19	1	231	121	126
ENSMUSG00000040722	Scamp5	2.102	2.1e-06	0.00035	40	89	69	268	323	257	44	90	69	255	305	256
ENSMUSG00000001120	Pcbp3	1.681	3.8e-06	0.00059	107	202	156	473	415	603	118	205	156	450	391	601
ENSMUSG00000016624	Phf21b	4.923	6.6e-06	0.00099	0	7	0	49	115	53	0	7	0	47	109	53
ENSMUSG00000034799	Unc13a	1.67	2.1e-06	0.00036	155	111	175	392	542	469	170	113	175	373	511	468
ENSMUSG00000046491	C1qtnf2	2.05	1.8e-05	0.0025	51	39	96	193	288	290	56	40	96	184	272	289
ENSMUSG00000043843	Tmem145	4.001	2.9e-05	0.0037	0	3	8	74	53	52	0	3	8	70	50	52
ENSMUSG00000041216	Clvs1	1.911	0.00016	0.016	28	110	100	230	320	346	31	112	100	219	302	345
ENSMUSG00000070287	Slc35g2	1.905	6.6e-05	0.0077	41	138	82	427	294	256	45	140	82	406	277	255
ENSMUSG00000071265	1700086L19Rik	2.638	5.9e-09	1.4e-06	58	68	38	239	480	305	64	69	38	227	453	304
ENSMUSG00000040563	Lppr2	2.536	1.5e-06	0.00026	27	23	25	143	159	134	30	23	25	136	150	134
ENSMUSG00000097094	Gm26548	7.816	2.4e-06	0.0004	0	0	0	20	35	29	0	0	0	19	33	29
ENSMUSG00000087115	Pcsk2os2	6.182	3.8e-06	0.00059	0	1	0	33	22	42	0	1	0	31	21	42
ENSMUSG00000055254	Ntrk2	6.184	5.1e-06	0.00078	1	0	0	29	46	21	1	0	0	28	43	21
ENSMUSG00000031980	Agt	7.78	2.4e-06	0.0004	0	0	0	28	27	27	0	0	0	27	25	27
ENSMUSG00000004633	Chn2	-1.406	9.4e-05	0.01	756	602	611	135	267	341	831	611	612	128	252	340
ENSMUSG00000100556	Gm28902	7.738	3.9e-06	0.0006	0	0	0	20	27	33	0	0	0	19	25	33
ENSMUSG00000026594	Ralgps2	-1.353	2.5e-05	0.0033	724	845	620	191	340	325	796	858	621	182	321	324
ENSMUSG00000028982	Slc25a33	-2.173	4.7e-05	0.0057	238	133	183	62	25	35	262	135	183	59	24	35
ENSMUSG00000031700	Gpt2	-1.409	2e-05	0.0027	695	607	574	205	177	324	764	616	575	195	167	323
ENSMUSG00000031906	Smpd3	4.342	2.9e-10	9e-08	4	11	10	270	84	165	5	11	10	257	79	165
ENSMUSG00000030207	Fam234b	2.308	3.7e-05	0.0046	16	32	46	170	126	168	18	32	46	162	119	168
ENSMUSG00000029878	Dbpht2	4.046	5.9e-10	1.7e-07	10	7	14	100	270	145	11	7	14	95	255	145
ENSMUSG00000034947	Tmem106a	1.731	9.5e-05	0.01	51	144	85	288	336	304	56	146	85	274	317	303
ENSMUSG00000044288	Cnr1	-1.541	0.00016	0.016	1611	1123	1318	180	432	780	1771	1140	1320	171	407	778
ENSMUSG00000017453	Pipox	2.489	6.6e-05	0.0077	20	45	13	121	210	110	22	46	13	115	198	110
ENSMUSG00000079055	Slc8a3	8.138	1.2e-06	0.0002	0	0	0	63	18	24	0	0	0	60	17	24
ENSMUSG00000026442	Nfasc	5.946	3.5e-05	0.0044	0	1	0	15	46	22	0	1	0	14	43	22
ENSMUSG00000103375	Gm37181	7.53	2.3e-05	0.0031	0	0	0	15	37	17	0	0	0	14	35	17
ENSMUSG00000031144	Syp	2.047	6.9e-05	0.0078	28	63	36	199	179	148	31	64	36	189	169	148
ENSMUSG00000022665	Ccdc80	1.151	7.6e-06	0.0011	1021	1065	796	2580	1574	2247	1122	1081	797	2454	1484	2240
ENSMUSG00000022523	Fgf12	2.179	4.3e-05	0.0052	30	34	38	224	120	121	33	35	38	213	113	121
ENSMUSG00000056316	Gm9996	7.571	2.7e-05	0.0036	0	0	0	42	14	15	0	0	0	40	13	15
ENSMUSG00000021032	Ngb	5.872	2.9e-05	0.0037	0	1	0	32	30	17	0	1	0	30	28	17
ENSMUSG00000018865	Sult4a1	4.879	3.6e-05	0.0045	2	0	1	29	42	23	2	0	1	28	40	23
ENSMUSG00000079157	Fam155a	7.444	4.3e-05	0.0053	0	0	0	15	37	13	0	0	0	14	35	13
ENSMUSG00000095139	Pou3f2	2.563	6.8e-05	0.0078	13	11	24	97	114	71	14	11	24	92	108	71
ENSMUSG00000030428	Ttyh1	-1.169	1.5e-05	0.0022	2717	2134	1707	698	1119	1100	2986	2167	1710	664	1055	1097
ENSMUSG00000019066	Rab3d	1.287	4.9e-05	0.0058	196	221	291	645	583	498	216	224	291	614	550	497
ENSMUSG00000010342	Tex14	-4.284	3.3e-05	0.0042	34	52	22	2	1	2	37	53	22	2	1	2
ENSMUSG00000037664	Cdkn1c	-1.15	0.0002	0.019	10348	12111	8878	2403	5246	6475	11374	12298	8892	2286	4948	6456
ENSMUSG00000030730	Atp2a1	-2.15	1.3e-10	4.2e-08	3295	2135	1530	324	629	616	3622	2168	1532	308	593	614
ENSMUSG00000028036	Ptgfr	1.658	0.00014	0.015	76	102	65	178	301	291	84	104	65	169	284	290
ENSMUSG00000050966	Lin28a	7.35	8.7e-05	0.0093	0	0	0	35	18	8	0	0	0	33	17	8
ENSMUSG00000008489	Elavl2	2.391	0.0002	0.019	13	16	27	62	96	133	14	16	27	59	91	133
ENSMUSG00000020151	Ptprr	7.3	7.7e-05	0.0084	0	0	0	21	29	9	0	0	0	20	27	9
ENSMUSG00000042078	Svop	8.622	7.8e-08	1.5e-05	0	0	0	96	27	25	0	0	0	91	25	25
ENSMUSG00000039763	Dnajc28	-5.028	0.00011	0.011	26	34	18	0	0	2	29	35	18	0	0	2
ENSMUSG00000021913	Ogdhl	4.478	0.00015	0.016	1	0	4	63	38	15	1	0	4	60	36	15
ENSMUSG00000050677	Ccdc96	5.035	0.00021	0.021	1	0	1	10	40	25	1	0	1	9	38	25
ENSMUSG00000039385	Cdh6	5.01	0.00019	0.019	0	0	2	32	16	27	0	0	2	30	15	27
ENSMUSG00000032997	Chpf	1.271	2.5e-06	0.0004	692	598	601	2025	1144	1396	761	607	602	1926	1079	1392
ENSMUSG00000071719	Tmem28	8.484	7.5e-07	0.00013	0	0	0	42	83	9	0	0	0	40	78	9
ENSMUSG00000041420	Meis3	1.13	7.2e-05	0.0079	287	308	320	628	652	725	316	313	321	597	615	723
ENSMUSG00000046378	Asphd1	4.633	7e-05	0.0078	1	1	1	22	25	33	1	1	1	21	24	33
ENSMUSG00000019478	Rab4a	1.899	0.00044	0.038	29	60	40	231	117	134	32	61	40	220	110	134
ENSMUSG00000058975	Kcnc1	4.996	1.6e-07	3.1e-05	1	3	3	38	55	135	1	3	3	36	52	135
ENSMUSG00000022661	Cd200	-1.297	0.00059	0.048	9530	7094	7845	2891	5681	1388	10475	7204	7858	2750	5358	1384
ENSMUSG00000031805	Jak3	7.252	0.00029	0.027	0	0	0	29	3	24	0	0	0	28	3	24
ENSMUSG00000036611	Eepd1	1.72	0.00054	0.045	86	55	41	280	172	148	94	56	41	266	162	148
ENSMUSG00000032076	Cadm1	1.267	0.00056	0.046	118	225	175	465	339	441	130	228	175	442	320	440
ENSMUSG00000031079	Zfp300	7.145	0.0004	0.035	0	0	0	28	3	21	0	0	0	27	3	21
ENSMUSG00000097684	Gm26645	7.199	0.00024	0.022	0	0	0	18	32	5	0	0	0	17	30	5
ENSMUSG00000001901	Kcnh6	6.198	1.7e-05	0.0024	0	0	1	61	24	13	0	0	1	58	23	13
ENSMUSG00000010154	Spire2	7.034	0.00023	0.022	0	0	0	24	9	16	0	0	0	23	8	16
ENSMUSG00000025318	Jph3	7.366	0.00014	0.015	0	0	0	5	37	19	0	0	0	5	35	19
ENSMUSG00000103719	Gm38039	6.998	0.0005	0.042	0	0	0	4	21	22	0	0	0	4	20	22
ENSMUSG00000044349	Snhg11	7.083	0.00034	0.03	0	0	0	14	31	6	0	0	0	13	29	6
ENSMUSG00000079056	Kcnip3	6.988	0.00036	0.032	0	0	0	13	7	27	0	0	0	12	7	27
ENSMUSG00000028420	Tmem38b	-1.04	0.0006	0.048	605	666	637	356	341	230	665	676	638	339	322	229
ENSMUSG00000102243	Gm37718	5.413	0.00026	0.024	0	0	1	14	21	22	0	0	1	13	20	22
ENSMUSG00000049420	Tmem200a	7.836	1.9e-05	0.0027	0	0	0	24	54	7	0	0	0	23	51	7
ENSMUSG00000041730	Prrxl1	6.981	0.00024	0.022	0	0	0	21	16	10	0	0	0	20	15	10
ENSMUSG00000022454	Nell2	3.645	0.00037	0.032	0	4	18	147	96	33	0	4	18	140	91	33
ENSMUSG00000043719	Col6a6	1.32	0.00012	0.012	232	332	227	824	728	421	255	337	227	784	687	420
ENSMUSG00000002459	Rgs20	4.561	6.2e-05	0.0072	0	3	2	33	73	18	0	3	2	31	69	18
ENSMUSG00000102752	Gm7694	-5.463	2.9e-05	0.0038	67	24	17	2	0	0	74	24	17	2	0	0
ENSMUSG00000035270	Impg2	-5.334	0.00033	0.03	13	28	16	0	0	1	14	28	16	0	0	1
ENSMUSG00000055937	Krt28	-5.307	0.00038	0.033	26	19	11	0	0	1	28	19	11	0	0	1
ENSMUSG00000091002	Tcerg1l	3.256	6.9e-05	0.0078	52	15	2	144	365	152	57	15	2	137	344	152
ENSMUSG00000021700	Rab3c	7.456	0.00045	0.039	0	0	0	30	34	1	0	0	0	29	32	1
ENSMUSG00000048834	Vstm2a	2.108	2.2e-05	0.003	50	178	187	297	788	705	55	181	187	282	743	703
ENSMUSG00000003410	Elavl3	6.868	0.0004	0.035	0	0	0	17	9	18	0	0	0	16	8	18
ENSMUSG00000040907	Atp1a3	7.708	5.1e-05	0.0061	0	0	0	23	50	5	0	0	0	22	47	5
ENSMUSG00000063063	Ctnna2	3.118	0.00056	0.046	1	33	10	117	56	206	1	33	10	111	53	205
ENSMUSG00000087541	Hopxos	1.852	0.00038	0.033	37	75	70	109	288	260	41	76	70	104	272	259
ENSMUSG00000006235	Epor	2.014	0.00028	0.026	73	56	24	317	148	153	80	57	24	302	140	153
ENSMUSG00000017652	Cd40	7.015	0.00058	0.048	0	0	0	4	13	31	0	0	0	4	12	31
ENSMUSG00000032101	Ddx25	5.306	2.9e-05	0.0037	7	0	0	114	184	10	8	0	0	108	174	10
ENSMUSG00000046178	Nxph1	8.01	0.00033	0.03	0	0	0	33	63	0	0	0	0	31	60	0
ENSMUSG00000068122	Agtr2	1.999	3.6e-05	0.0045	97	76	63	437	138	370	107	77	63	416	130	369
ENSMUSG00000031283	Chrdl1	5.017	0.00015	0.015	0	0	3	17	70	20	0	0	3	16	66	20
ENSMUSG00000029249	Rest	-1.246	6.2e-05	0.0072	1541	813	888	527	356	484	1694	826	889	501	336	483
ENSMUSG00000034855	Cxcl10	1.693	0.0003	0.027	75	267	301	536	497	1044	83	271	301	510	469	1041
ENSMUSG00000020681	Ace	1.383	0.00012	0.012	249	296	404	917	1112	449	274	301	405	872	1049	448
ENSMUSG00000086806	Gm13054	3.595	0.00043	0.037	1	6	4	23	84	27	1	6	4	22	79	27
ENSMUSG00000054889	Dsp	-7.893	0.00048	0.041	65	0	24	0	0	0	71	0	24	0	0	0
ENSMUSG00000059325	Hopx	1.885	7.1e-05	0.0079	82	111	105	147	523	431	90	113	105	140	493	430
ENSMUSG00000021587	Pcsk1	7.677	0.00031	0.028	0	0	0	1	56	19	0	0	0	1	53	19
ENSMUSG00000036931	Nfkbid	5.963	0.00053	0.045	1	0	0	61	19	2	1	0	0	58	18	2
ENSMUSG00000041616	Nppa	5.17	2.8e-05	0.0037	2	0	2	16	111	24	2	0	2	15	105	24
ENSMUSG00000074461	Gm10699	4.864	0.00054	0.045	0	3	0	14	69	13	0	3	0	13	65	13
ENSMUSG00000096995	2810029C07Rik	7.887	7.9e-05	0.0086	0	0	0	4	72	12	0	0	0	4	68	12
ENSMUSG00000031880	Rrad	1.414	0.00035	0.031	472	218	505	711	773	1701	519	221	506	676	729	1696
ENSMUSG00000029304	Spp1	8.224	0.00019	0.018	2	0	1	961	1	0	2	0	1	914	1	0

## Sheet: list DEG in mb(significant)
List of differentially expressed genes between WT and REST-cKO myoblasts (Only significant: absolute log2FC >1, p-adj<0.05)
id	gene_symbol	log_FC	edger.p.value	edger.adj.p.value	WT1_2_myob_REST_RNASeq.norm	WT2_2_myob_REST_RNASeq.norm	WT3_2_myob_REST_RNASeq.norm	KO1_2_myob_REST_RNASeq.norm	KO2_2_myob_REST_RNASeq.norm	KO3_2_myob_REST_RNASeq.norm	WT1_2_myob_REST_RNASeq.raw	WT2_2_myob_REST_RNASeq.raw	WT3_2_myob_REST_RNASeq.raw	KO1_2_myob_REST_RNASeq.raw	KO2_2_myob_REST_RNASeq.raw	KO3_2_myob_REST_RNASeq.raw
ENSMUSG00000033676	Gabrb3	8.11	2.7e-166	1.6e-162	0	3	9	1065	1144	1180	0	3	8	1009	1297	1389
ENSMUSG00000027273	Snap25	7.208	2.5e-134	8.6e-131	0	8	9	833	844	931	0	8	8	789	956	1095
ENSMUSG00000025777	Gdap1	7.015	1.4e-102	2.1e-99	1	2	17	767	915	910	1	2	15	727	1037	1071
ENSMUSG00000015829	Tnr	7.057	3.4e-119	9.1e-116	2	3	14	888	873	749	2	3	12	841	989	882
ENSMUSG00000027581	Stmn3	10.378	2.8e-213	6.7e-209	4	0	0	1845	1957	2421	4	0	0	1748	2218	2849
ENSMUSG00000029121	Crmp1	6.923	1.6e-112	3.2e-109	4	7	5	611	630	761	4	7	4	579	714	895
ENSMUSG00000033061	Resp18	12.319	2.5e-122	7.4e-119	0	0	0	594	574	733	0	0	0	563	651	862
ENSMUSG00000033615	Cplx1	7.105	6.9e-104	1.1e-100	7	5	0	654	525	642	7	5	0	620	595	755
ENSMUSG00000042750	Bex2	6.424	1.2e-52	6.6e-50	35	2	11	1266	1316	1624	34	2	9	1199	1492	1911
ENSMUSG00000027350	Chgb	6.817	1e-115	2.2e-112	6	5	8	633	838	761	6	5	7	600	949	895
ENSMUSG00000103719	Gm38039	8.851	4.7e-104	8.1e-101	0	0	3	613	586	470	0	0	3	581	664	553
ENSMUSG00000023473	Celsr3	5.936	2.3e-87	2.7e-84	3	10	17	624	539	652	3	10	14	591	611	767
ENSMUSG00000032181	Scg3	13.444	7.5e-178	6e-174	0	0	0	1160	1346	1642	0	0	0	1099	1525	1932
ENSMUSG00000022269	2024-03-11	5.113	6.4e-78	5.9e-75	16	11	31	702	650	624	15	11	26	665	737	735
ENSMUSG00000022619	Mapk8ip2	8.131	7.8e-85	8.9e-82	4	0	0	377	429	504	4	0	0	357	486	593
ENSMUSG00000030683	Sez6l2	6.283	2.6e-79	2.6e-76	0	8	11	512	441	507	0	8	9	485	500	597
ENSMUSG00000062444	Ap3b2	5.566	2.2e-84	2.4e-81	14	5	17	529	576	557	13	5	14	501	653	655
ENSMUSG00000050711	Scg2	8.764	2.4e-189	2.9e-185	4	3	7	1763	1995	2503	4	3	6	1670	2261	2945
ENSMUSG00000019796	Lrp11	3.333	7.3e-91	9.8e-88	229	229	256	2160	2416	2610	218	233	209	2046	2738	3071
ENSMUSG00000040035	Disp2	3.182	9.6e-89	1.2e-85	254	236	248	2130	2162	2413	242	240	203	2018	2450	2839
ENSMUSG00000023236	Scg5	6.409	1.7e-72	1.4e-69	3	10	0	383	408	418	3	10	0	363	462	492
ENSMUSG00000071234	Syndig1l	7.029	4.2e-69	3.3e-66	2	3	2	389	294	349	2	3	2	369	333	411
ENSMUSG00000039860	Srrm3	6.596	6.5e-69	4.9e-66	0	8	3	353	351	368	0	8	2	334	398	433
ENSMUSG00000017943	Gdap1l1	6.702	2.6e-82	2.7e-79	5	0	11	628	460	537	5	0	9	595	522	632
ENSMUSG00000021194	Chga	8.018	7.5e-71	6e-68	1	0	2	289	314	332	1	0	2	274	356	391
ENSMUSG00000006575	Rundc3a	6.483	8.6e-136	3.4e-132	16	10	22	1500	1573	1130	15	10	18	1421	1782	1330
ENSMUSG00000037428	Vgf	12.457	1.6e-117	3.9e-114	0	0	0	547	730	814	0	0	0	518	827	958
ENSMUSG00000049281	Scn3b	3.072	3.8e-33	1.6e-30	294	172	119	1692	1662	1580	280	175	97	1603	1884	1859
ENSMUSG00000032890	Rims3	4.826	1.5e-64	1e-61	20	17	10	500	407	440	19	17	8	474	461	518
ENSMUSG00000048978	Nrsn1	7.486	7.7e-157	3.7e-153	7	11	7	1311	1470	1906	7	11	6	1242	1666	2243
ENSMUSG00000018293	Pfn1	-2.911	1.6e-33	7.3e-31	19187	16972	18076	3139	1419	2650	18256	17281	14767	2974	1609	3119
ENSMUSG00000069814	E130309D14Rik	8.255	2.9e-57	1.8e-54	0	0	2	305	243	226	0	0	2	289	276	266
ENSMUSG00000027500	Stmn2	4.334	6.8e-107	1.2e-103	347	493	370	6718	8576	9137	330	502	302	6364	9719	10752
ENSMUSG00000048330	Ric3	4.847	1.3e-28	4.9e-26	3	7	28	389	338	375	3	7	24	369	383	441
ENSMUSG00000035521	Gnptg	2.895	2.7e-65	1.9e-62	163	169	159	1093	1272	1293	155	172	130	1035	1441	1521
ENSMUSG00000004113	Cacna1b	4.81	2.6e-66	1.9e-63	15	20	16	550	469	408	14	20	13	521	532	480
ENSMUSG00000034336	Ina	6.315	5.9e-56	3.5e-53	2	5	3	238	267	293	2	5	2	225	303	345
ENSMUSG00000058975	Kcnc1	2.955	4.6e-30	1.8e-27	199	104	86	1002	1085	943	190	106	70	949	1230	1110
ENSMUSG00000042873	Lhfpl4	5.17	5.6e-64	3.7e-61	12	9	17	399	408	531	11	9	14	378	463	625
ENSMUSG00000021700	Rab3c	7.99	2.2e-74	1.9e-71	0	1	3	355	349	489	0	1	3	336	396	575
ENSMUSG00000021587	Pcsk1	4.524	3e-48	1.6e-45	21	11	14	311	332	406	20	11	11	295	376	477
ENSMUSG00000038916	Soga3	5.035	1.5e-53	8.4e-51	10	12	32	494	695	551	9	12	27	468	787	649
ENSMUSG00000040687	Madd	3.674	1.6e-78	1.6e-75	97	84	89	1157	1321	977	92	86	73	1096	1497	1150
ENSMUSG00000061601	Pclo	3.308	1.3e-42	7e-40	51	36	51	397	482	496	49	37	42	376	546	584
ENSMUSG00000023033	Scn8a	5.05	4.3e-15	6.2e-13	1	0	20	241	223	233	1	0	17	228	253	274
ENSMUSG00000027223	Mapk8ip1	4.16	8.2e-61	5.3e-58	44	37	25	534	754	628	42	38	20	506	854	739
ENSMUSG00000069227	Gprin1	3.767	3.6e-37	1.7e-34	14	33	29	326	370	348	13	34	24	309	419	410
ENSMUSG00000051146	Camk2n2	2.689	1.2e-46	6.6e-44	121	108	105	666	780	712	115	110	86	631	884	838
ENSMUSG00000041544	Ptchd2	3.836	5.6e-24	1.7e-21	6	33	24	343	263	318	6	34	20	325	298	374
ENSMUSG00000039714	Cplx3	5.686	3.8e-77	3.4e-74	19	6	18	758	878	563	18	6	15	718	995	663
ENSMUSG00000063063	Ctnna2	4.96	6.4e-42	3.3e-39	6	6	7	213	196	206	6	6	6	202	222	243
ENSMUSG00000050132	Sarm1	4.423	5.1e-33	2.2e-30	6	7	18	223	206	235	6	7	15	211	233	277
ENSMUSG00000054423	Cadps	5.687	4.7e-37	2.2e-34	2	4	3	158	160	144	2	4	2	150	181	169
ENSMUSG00000016624	Phf21b	3.719	3.8e-26	1.3e-23	42	40	11	491	360	385	40	41	8	465	408	453
ENSMUSG00000042763	Maneal	6.053	5.1e-57	3.1e-54	2	8	7	442	283	444	2	8	6	419	321	522
ENSMUSG00000032641	Gpr19	3.273	1.7e-27	6e-25	24	48	24	343	288	306	23	49	19	325	327	360
ENSMUSG00000091002	Tcerg1l	5.304	1.8e-57	1.1e-54	8	12	10	353	342	509	8	12	8	334	388	598
ENSMUSG00000101162	Gm26728	-3.193	3.5e-31	1.5e-28	265	271	280	36	23	31	252	276	229	34	26	36
ENSMUSG00000078812	Eif5a	-2.284	4.5e-29	1.7e-26	15678	12006	13577	3610	2030	2833	14917	12225	11092	3420	2301	3334
ENSMUSG00000031391	L1cam	5.32	1.3e-27	4.6e-25	0	4	6	161	112	131	0	4	5	153	127	154
ENSMUSG00000049265	Kcnk3	7.166	2.7e-38	1.3e-35	0	1	2	162	135	222	0	1	2	153	153	261
ENSMUSG00000039809	Gabbr2	4.894	8.3e-26	2.7e-23	10	2	1	141	131	152	10	2	1	134	149	179
ENSMUSG00000052353	Cemip	2.165	2.5e-25	7.9e-23	110	178	124	641	583	630	105	181	101	607	661	741
ENSMUSG00000018865	Sult4a1	3.368	1.5e-14	2e-12	39	24	6	244	198	266	37	24	4	231	225	313
ENSMUSG00000032011	Thy1	3.769	4.8e-26	1.6e-23	16	7	19	208	182	180	15	7	16	197	206	212
ENSMUSG00000042751	Nmnat2	1.918	7.4e-27	2.6e-24	198	265	241	962	795	905	188	270	197	911	901	1065
ENSMUSG00000067578	Cbln4	4.283	5.6e-29	2.1e-26	6	16	9	238	157	215	6	16	7	226	178	253
ENSMUSG00000020333	Acsl6	2.348	3.2e-28	1.2e-25	90	89	87	525	401	435	86	91	71	497	455	512
ENSMUSG00000032589	Bsn	2.88	1.7e-26	5.7e-24	45	38	34	318	241	314	43	39	28	301	273	369
ENSMUSG00000018362	Kpna2	-1.82	5.5e-22	1.4e-19	1006	909	1015	330	206	294	957	926	829	313	234	346
ENSMUSG00000059552	Trp53	-1.874	1.5e-16	2.5e-14	1139	1014	934	378	181	285	1084	1032	763	358	205	335
ENSMUSG00000053137	Mapk11	2.711	1.3e-23	3.7e-21	40	40	57	269	275	354	38	41	47	255	312	416
ENSMUSG00000003873	Bax	-1.536	2.1e-20	4.9e-18	5001	4824	4276	1813	1282	1769	4758	4912	3493	1718	1453	2082
ENSMUSG00000031748	Gnao1	3.333	4.5e-14	5.6e-12	40	10	11	173	246	199	38	10	9	164	279	234
ENSMUSG00000000308	Ckmt1	4.723	1.2e-22	3.2e-20	4	18	2	202	172	271	4	18	1	191	195	319
ENSMUSG00000045991	Onecut2	2.746	4.3e-20	9.8e-18	23	52	49	269	276	288	22	53	40	255	313	339
ENSMUSG00000073411	H2-D1	1.664	1.3e-23	3.7e-21	347	340	429	1089	1125	1318	330	346	351	1032	1275	1551
ENSMUSG00000022054	Nefm	10.113	5.6e-94	7.9e-91	1	0	1	831	637	1333	1	0	1	787	722	1568
ENSMUSG00000036766	Dner	1.647	2.3e-23	6.4e-21	1310	1485	1102	3467	4398	4342	1246	1512	900	3284	4984	5110
ENSMUSG00000015127	Unkl	2.68	3.8e-24	1.1e-21	33	50	44	263	286	266	31	51	36	249	324	313
ENSMUSG00000046711	Hmga1	-2.825	3.7e-23	1e-20	360	252	289	43	31	53	343	257	236	41	35	62
ENSMUSG00000071719	Tmem28	9.232	2.8e-24	8.6e-22	0	0	0	85	61	77	0	0	0	81	69	91
ENSMUSG00000102349	Gm37376	-2.666	1.1e-30	4.5e-28	74682	91612	99265	9613	19387	12848	71059	93280	81095	9107	21970	15120
ENSMUSG00000007041	Clic1	-1.48	1.2e-20	2.9e-18	4418	3984	4650	1415	1408	1855	4204	4057	3799	1340	1596	2183
ENSMUSG00000029054	Gabrd	8.003	6.9e-41	3.4e-38	0	0	2	273	239	139	0	0	2	259	271	164
ENSMUSG00000016494	Cd34	2.116	2.7e-16	4.4e-14	64	134	97	472	373	435	61	136	79	447	423	512
ENSMUSG00000027419	Pcsk2	2.366	1.2e-36	5.6e-34	229	244	192	1235	919	1281	218	248	157	1170	1042	1507
ENSMUSG00000046204	Pnma2	4.575	1.6e-20	3.7e-18	8	0	12	142	133	207	8	0	10	134	151	243
ENSMUSG00000050556	Kcnb1	2.485	6.6e-22	1.6e-19	50	50	51	266	338	248	48	51	42	252	383	292
ENSMUSG00000028953	Abcf2	-1.743	2.4e-13	2.8e-11	695	617	678	276	128	190	661	628	554	262	146	224
ENSMUSG00000062252	Lhfpl5	4.891	2.9e-19	6.1e-17	0	14	3	159	218	132	0	14	2	151	247	156
ENSMUSG00000033419	Snap91	2.674	1.3e-18	2.7e-16	41	48	24	204	259	263	39	49	19	193	294	309
ENSMUSG00000021198	Unc79	3.754	1.7e-09	1.1e-07	6	0	22	132	142	115	6	0	19	125	161	136
ENSMUSG00000028139	Riiad1	2.626	5.8e-22	1.5e-19	31	48	40	232	248	258	29	49	33	220	281	303
ENSMUSG00000043843	Tmem145	5.282	1.5e-22	4.1e-20	5	0	1	92	86	88	5	0	1	87	97	104
ENSMUSG00000030867	Plk1	-1.592	6.1e-21	1.5e-18	993	825	770	278	284	297	945	840	629	263	322	349
ENSMUSG00000015094	Npdc1	1.422	2.2e-21	5.3e-19	669	566	643	1569	1684	1777	637	576	525	1486	1908	2091
ENSMUSG00000003868	Ruvbl2	-1.506	4e-19	8.5e-17	1318	1052	1121	430	347	453	1254	1071	916	407	393	533
ENSMUSG00000046378	Asphd1	3.181	7.2e-19	1.5e-16	23	20	9	146	150	179	22	20	7	138	170	211
ENSMUSG00000066551	Hmgb1	-1.352	1.5e-22	4.1e-20	3156	2960	3034	1239	1161	1185	3003	3014	2479	1174	1316	1394
ENSMUSG00000101503	Gm28364	-2.645	2.3e-17	4.3e-15	263	222	178	42	24	40	250	226	145	40	27	47
ENSMUSG00000084998	Gm16279	-2.299	8.5e-16	1.3e-13	280	293	301	53	39	85	266	298	246	50	45	99
ENSMUSG00000024436	Mrps18b	-2.302	8.3e-18	1.6e-15	503	361	467	123	59	88	479	368	382	117	67	104
ENSMUSG00000035621	Midn	1.501	6.1e-21	1.5e-18	309	369	366	950	1069	936	294	376	299	900	1211	1102
ENSMUSG00000090071	Cdk5r2	8.95	2.7e-22	7e-20	0	0	0	62	71	51	0	0	0	59	80	60
ENSMUSG00000026833	Olfm1	1.484	6.8e-25	2.1e-22	5731	5931	5725	14305	17551	16781	5453	6039	4677	13552	19890	19748
ENSMUSG00000028451	1700022I11Rik	-1.708	1.2e-14	1.5e-12	559	532	660	218	123	195	532	542	539	207	140	229
ENSMUSG00000002728	Naa20	-1.449	1.9e-19	4e-17	1285	1092	1385	491	415	472	1223	1112	1132	465	470	556
ENSMUSG00000070287	Slc35g2	2.801	1.5e-20	3.5e-18	21	31	25	176	191	173	20	32	20	167	216	204
ENSMUSG00000056201	Cfl1	-2.094	6.1e-34	2.8e-31	9130	6410	8146	1915	1593	2038	8687	6527	6655	1814	1806	2398
ENSMUSG00000067389	Gm17080	-1.666	2.7e-11	2.3e-09	1087	1067	937	472	192	311	1034	1086	765	447	218	366
ENSMUSG00000009076	Zmat5	-1.53	2.5e-11	2.2e-09	746	810	744	272	168	356	710	825	608	258	191	418
ENSMUSG00000022157	Mcpt8	-1.283	3.1e-20	7e-18	3167	3298	3048	1365	1243	1303	3013	3358	2490	1293	1409	1533
ENSMUSG00000006498	Ptbp1	-1.413	1.6e-14	2e-12	1256	1211	1183	436	352	582	1195	1233	966	413	399	684
ENSMUSG00000034729	Mrps10	-1.413	4.7e-19	1e-16	1332	1105	1092	435	414	476	1267	1125	892	412	469	560
ENSMUSG00000015668	Pdzd11	-1.307	8e-17	1.4e-14	2045	1820	1984	924	697	745	1946	1853	1621	875	790	877
ENSMUSG00000025738	Fbxl16	2.416	8.3e-14	1e-11	95	66	33	317	306	416	91	67	26	300	347	489
ENSMUSG00000050822	Slc29a4	2.104	9.1e-20	2e-17	86	117	88	362	389	504	82	119	72	343	441	593
ENSMUSG00000037217	Syn1	1.751	4.2e-15	6e-13	196	116	148	595	459	496	187	118	121	564	520	584
ENSMUSG00000075702	Selm	-1.544	4e-09	2.3e-07	716	719	763	340	134	281	681	732	623	322	152	330
ENSMUSG00000040950	Mgl2	-1.577	2.3e-16	3.8e-14	540	684	640	232	170	223	514	696	523	220	193	262
ENSMUSG00000006519	Cyba	-2.148	7e-09	3.7e-07	358	458	453	115	33	138	341	466	370	109	38	162
ENSMUSG00000100556	Gm28902	7.534	4.2e-23	1.2e-20	0	0	1	117	58	94	0	0	1	111	66	111
ENSMUSG00000042078	Svop	2.046	2.2e-18	4.4e-16	70	72	79	267	310	337	67	73	65	253	351	397
ENSMUSG00000034818	Celf5	2.376	4.8e-19	1e-16	40	49	41	212	250	213	38	50	33	201	283	251
ENSMUSG00000032297	Celf6	5.249	1.2e-26	4e-24	6	0	8	148	154	253	6	0	7	140	175	297
ENSMUSG00000021116	Eif2s1	-1.497	1.6e-19	3.6e-17	2885	2236	2840	933	809	1077	2745	2277	2320	884	917	1267
ENSMUSG00000026683	Nuf2	-1.565	3.5e-17	6.5e-15	643	568	563	187	177	235	612	578	460	177	201	276
ENSMUSG00000028832	Stmn1	-1.422	4.5e-12	4.5e-10	894	836	903	315	234	434	851	851	738	298	265	510
ENSMUSG00000033200	Tpsg1	2.761	4.6e-16	7.4e-14	15	25	30	147	145	181	14	25	25	139	164	213
ENSMUSG00000057716	Tmem178b	3.297	9.5e-17	1.7e-14	12	18	6	104	116	139	11	18	5	98	131	163
ENSMUSG00000004347	Pde1c	1.418	5.7e-18	1.1e-15	311	294	297	752	898	760	296	299	243	712	1018	895
ENSMUSG00000097057	Gm17638	-1.497	5e-13	5.6e-11	650	658	660	244	163	290	618	670	539	231	185	341
ENSMUSG00000036398	Ppp1r11	-1.236	7.6e-10	5.1e-08	1585	1587	1638	893	469	681	1508	1616	1338	846	532	801
ENSMUSG00000019942	Cdk1	-1.197	1e-15	1.6e-13	3319	3002	2965	1236	1276	1537	3158	3057	2422	1171	1446	1809
ENSMUSG00000024038	Ndufv3	1.193	4.1e-15	5.9e-13	2937	2211	2378	5848	5524	5839	2795	2251	1943	5540	6260	6872
ENSMUSG00000025867	Cplx2	1.33	2.3e-16	3.9e-14	375	312	395	853	909	958	357	318	323	808	1030	1127
ENSMUSG00000024498	Tcerg1	-1.245	5e-18	9.9e-16	1676	1685	1857	694	762	744	1595	1716	1517	657	864	876
ENSMUSG00000041309	Nkx6-2	1.494	4.2e-16	6.8e-14	209	227	191	510	647	611	199	231	156	483	733	719
ENSMUSG00000056220	Pla2g4a	-1.702	4.3e-15	6.2e-13	383	417	458	112	112	162	364	425	374	106	127	190
ENSMUSG00000052253	Zfp622	1.184	2.3e-16	3.8e-14	1110	1362	1262	2794	2849	2844	1056	1387	1031	2647	3229	3347
ENSMUSG00000045648	Vwc2l	3.866	1.9e-13	2.2e-11	7	1	11	111	65	102	7	1	9	105	74	120
ENSMUSG00000028062	Lamtor2	-1.211	2e-09	1.2e-07	3032	3175	3060	1700	886	1417	2885	3233	2500	1611	1005	1668
ENSMUSG00000020180	Snrpd3	-1.183	1.2e-15	1.8e-13	4223	4127	4039	1754	1620	2082	4018	4202	3300	1662	1836	2450
ENSMUSG00000045039	Megf8	1.305	1.9e-14	2.5e-12	383	546	440	1167	1191	1025	364	556	359	1106	1350	1207
ENSMUSG00000000278	Scpep1	-1.502	4.3e-13	4.8e-11	529	575	592	197	149	252	503	585	484	187	169	296
ENSMUSG00000086459	1700030C12Rik	-2.828	8.3e-16	1.3e-13	148	118	135	19	12	25	141	120	110	18	14	29
ENSMUSG00000023036	Pcdhga8	1.949	4.4e-15	6.2e-13	62	64	88	266	301	257	59	65	72	252	341	302
ENSMUSG00000025034	Trim8	1.167	8.3e-16	1.3e-13	1097	1360	1224	2791	2751	2728	1044	1385	1000	2644	3118	3210
ENSMUSG00000052456	Asna1	-1.867	2.1e-06	5.7e-05	356	385	373	170	34	102	339	392	305	161	39	120
ENSMUSG00000004098	Col5a3	2.418	1.5e-10	1.2e-08	15	50	33	154	200	172	14	51	27	146	226	203
ENSMUSG00000044629	Cnrip1	1.592	7.4e-16	1.2e-13	151	128	153	477	401	423	144	130	125	452	455	498
ENSMUSG00000026688	Mgst3	-1.496	9.8e-16	1.5e-13	570	466	529	192	164	198	542	474	432	182	186	233
ENSMUSG00000027712	Anxa5	-1.304	7.9e-16	1.2e-13	2240	1701	2000	760	733	912	2131	1732	1634	720	831	1073
ENSMUSG00000086605	Gm14290	2.635	3.3e-14	4.2e-12	29	15	26	167	144	123	28	15	21	158	163	145
ENSMUSG00000092341	Malat1	-2.35	1.9e-25	6e-23	104154	123377	129834	15883	32308	21915	99101	125623	106069	15047	36613	25790
ENSMUSG00000038112	AW551984	1.525	5.9e-11	4.9e-09	554	356	250	1185	1144	1011	527	362	204	1123	1297	1190
ENSMUSG00000006335	Tfpt	-1.562	9.5e-12	8.9e-10	411	417	472	195	110	136	391	425	386	185	125	160
ENSMUSG00000105692	Gm43737	-2.133	3.6e-14	4.6e-12	180	206	254	57	40	48	171	210	208	54	46	57
ENSMUSG00000085278	Gm12841	-1.705	1.5e-08	7.1e-07	546	649	572	274	89	179	519	661	467	260	101	211
ENSMUSG00000019505	Ubb	-1.212	5.2e-15	7.3e-13	10436	9791	11549	4892	3829	4996	9930	9969	9435	4634	4339	5879
ENSMUSG00000032171	Pin1	-1.355	7.1e-15	9.6e-13	3507	2683	3125	1411	964	1268	3337	2732	2553	1337	1093	1492
ENSMUSG00000070802	Pnmal2	1.192	1.2e-15	1.7e-13	564	643	578	1284	1347	1450	537	655	472	1216	1527	1706
ENSMUSG00000020386	Sar1b	-1.22	5.9e-15	8.1e-13	1304	1188	1172	477	496	599	1241	1210	957	452	562	705
ENSMUSG00000027215	Cd82	-1.248	5.9e-10	4.1e-08	1050	920	1005	495	282	476	999	937	821	469	320	560
ENSMUSG00000001288	Rarg	-2.037	5.4e-14	6.6e-12	276	209	192	49	58	58	263	213	157	46	66	68
ENSMUSG00000097257	Gm26768	-2.137	1.3e-12	1.4e-10	223	179	237	31	54	60	212	182	194	29	61	70
ENSMUSG00000044442	N6amt1	-1.433	1.3e-09	8.2e-08	647	551	545	132	260	253	616	561	445	125	294	297
ENSMUSG00000045689	Pcdhb4	3.829	3.7e-14	4.6e-12	9	2	5	94	62	80	9	2	4	89	70	94
ENSMUSG00000014195	Dnajc7	-1.143	3.9e-14	4.9e-12	1607	1740	1410	739	669	747	1529	1772	1152	700	758	879
ENSMUSG00000035495	Tstd2	1.285	5.8e-15	8e-13	838	863	663	2216	1785	1764	797	879	541	2099	2023	2076
ENSMUSG00000061576	Dpp6	2.03	5.8e-14	7.1e-12	40	64	59	231	227	207	38	65	48	219	257	244
ENSMUSG00000106106	Rn18s-rs5	-1.917	3.2e-30	1.3e-27	89356	92162	63381	20507	21941	22381	85021	93840	51779	19427	24865	26339
ENSMUSG00000029189	Sel1l3	1.378	5e-14	6.1e-12	221	235	218	680	531	541	210	239	178	644	602	637
ENSMUSG00000025876	Unc5a	2.425	6.2e-15	8.5e-13	44	38	28	200	245	154	42	39	23	189	277	182
ENSMUSG00000032643	Fhl3	1.44	2e-12	2.1e-10	141	157	211	473	439	467	134	160	173	448	498	550
ENSMUSG00000107512	RP23-178I17.3	4.584	4.9e-18	9.8e-16	1	5	6	77	135	81	1	5	5	73	153	96
ENSMUSG00000034656	Cacna1a	3.156	1.5e-27	5.3e-25	36	40	56	300	513	362	34	41	46	284	581	426
ENSMUSG00000020585	Laptm4a	1.076	3.1e-13	3.6e-11	2234	2389	1889	4379	4876	4476	2126	2432	1543	4148	5526	5267
ENSMUSG00000057897	Camk2b	2.1	8.4e-20	1.9e-17	95	98	98	490	439	319	90	100	80	464	498	376
ENSMUSG00000023909	Paqr4	1.172	1.6e-12	1.7e-10	546	469	399	976	1154	1061	520	478	326	925	1308	1249
ENSMUSG00000046442	Ppm1e	2.356	5.8e-17	1e-14	75	49	50	247	375	270	71	50	41	234	425	318
ENSMUSG00000013150	Gfod2	1.28	1.5e-09	9.2e-08	184	296	328	707	642	611	175	301	268	670	728	719
ENSMUSG00000028312	Smc2	-1.122	2.5e-14	3.2e-12	1433	1562	1448	619	698	723	1363	1590	1183	586	791	851
ENSMUSG00000042524	Sun2	1.31	3.8e-12	3.8e-10	201	267	256	556	684	554	191	272	209	527	775	652
ENSMUSG00000096780	Tmem181b-ps	2.039	5.9e-17	1.1e-14	109	77	121	517	371	371	104	78	99	490	421	437
ENSMUSG00000055069	Rab39	3.971	5.8e-13	6.4e-11	6	1	6	55	61	95	6	1	5	52	69	111
ENSMUSG00000041736	Tspo	-1.065	3.7e-12	3.8e-10	4981	4027	4150	1877	2338	2072	4739	4100	3390	1778	2650	2438
ENSMUSG00000024844	Banf1	-1.124	6.1e-10	4.2e-08	6027	5078	5326	2678	1847	3016	5735	5170	4351	2537	2093	3549
ENSMUSG00000038886	Man2a2	1.329	5.6e-16	8.9e-14	623	721	620	1724	1852	1360	593	734	506	1633	2099	1601
ENSMUSG00000090860	Gm17134	-1.173	9e-10	5.9e-08	987	1102	1117	449	359	614	939	1122	913	425	407	722
ENSMUSG00000063902	Gm7964	-3.322	5.7e-11	4.8e-09	77	70	94	16	3	5	73	71	77	15	4	6
ENSMUSG00000060568	Fam78b	2.364	2.9e-16	4.8e-14	41	66	68	234	375	292	39	67	56	222	425	344
ENSMUSG00000097234	Gm26518	-1.808	8.2e-09	4.3e-07	283	217	223	84	38	84	269	221	182	80	43	99
ENSMUSG00000028328	Tmod1	1.256	3.3e-13	3.8e-11	776	729	550	1884	1489	1538	738	742	449	1785	1688	1810
ENSMUSG00000003099	Ppp5c	-1.275	1.2e-10	9.2e-09	654	574	534	303	200	226	622	584	436	287	227	266
ENSMUSG00000025487	Psmd13	-1.142	1.1e-08	5.7e-07	1535	1554	1484	942	515	617	1461	1582	1212	893	584	726
ENSMUSG00000083022	Rps15a-ps6	1.32	2.2e-11	2e-09	185	231	236	442	586	598	176	235	193	419	664	704
ENSMUSG00000039108	Lsm14b	1.419	3e-16	4.8e-14	349	380	332	980	1086	773	332	387	271	928	1231	910
ENSMUSG00000025823	Pdia4	-1.165	1.5e-12	1.6e-10	909	1064	1078	389	453	518	865	1083	881	368	513	609
ENSMUSG00000035673	Sbno2	-2.918	6.7e-10	4.6e-08	67	102	112	22	7	8	64	104	92	21	8	10
ENSMUSG00000073702	Rpl31	1.109	8.2e-15	1.1e-12	5672	5667	5152	10611	12612	12352	5397	5770	4209	10052	14293	14536
ENSMUSG00000028007	Snx7	-1.169	4.2e-12	4.2e-10	1061	881	845	362	407	469	1010	897	690	343	461	552
ENSMUSG00000042532	Golga7b	8.856	5.6e-18	1.1e-15	0	0	0	37	84	51	0	0	0	35	95	60
ENSMUSG00000089766	Gm16538	-1.635	1.3e-13	1.5e-11	317	293	267	98	90	94	302	298	218	93	102	111
ENSMUSG00000001494	Sost	1.613	2.7e-12	2.8e-10	116	195	149	530	499	383	110	199	122	502	565	451
ENSMUSG00000049086	Bmyc	-1.454	2.4e-10	1.8e-08	401	361	347	175	105	126	382	368	283	166	119	148
ENSMUSG00000054013	Tmem179	1.693	6.4e-13	7e-11	90	110	122	296	424	323	86	112	100	280	480	380
ENSMUSG00000031821	Gins2	-1.043	2.4e-12	2.5e-10	1774	1807	1494	855	776	833	1688	1840	1220	810	880	980
ENSMUSG00000008489	Elavl2	5.609	7.1e-29	2.7e-26	6	3	3	117	197	280	6	3	2	111	223	329
ENSMUSG00000036330	Slc18a1	1.868	1.1e-09	6.8e-08	72	34	63	194	236	191	69	35	52	184	267	225
ENSMUSG00000097722	Gm26841	-1.603	1.5e-10	1.1e-08	297	324	263	97	71	123	283	330	215	92	81	144
ENSMUSG00000019768	Esr1	1.31	9.2e-13	1e-10	241	207	188	571	506	500	229	211	153	541	574	589
ENSMUSG00000047534	Mis18bp1	-1.335	4.2e-12	4.2e-10	425	541	520	178	186	224	404	551	425	169	211	263
ENSMUSG00000057322	Rpl38	1.197	1.3e-14	1.7e-12	6839	6616	6664	12480	16800	16844	6507	6736	5444	11823	19039	19823
ENSMUSG00000030374	Strn4	-1.132	1.7e-12	1.8e-10	1091	892	955	395	477	467	1038	908	780	374	540	550
ENSMUSG00000029712	Actl6b	5.324	6.9e-16	1.1e-13	0	0	8	93	76	158	0	0	7	88	87	185
ENSMUSG00000050751	Pgbd5	3.302	1e-10	8.1e-09	5	3	14	68	64	89	5	3	12	64	73	105
ENSMUSG00000032452	Clstn2	2.257	6.6e-09	3.6e-07	33	45	13	165	134	138	31	46	10	156	152	163
ENSMUSG00000085572	Gm16234	-2.095	1.2e-07	4.9e-06	151	134	183	56	15	38	144	136	150	53	18	45
ENSMUSG00000108511	RP23-133N24.2	1.004	3.8e-12	3.8e-10	1544	1509	1310	3084	2954	2713	1469	1536	1070	2922	3348	3193
ENSMUSG00000031010	Usp9x	-1.31	2.6e-11	2.3e-09	399	523	493	215	172	184	380	533	403	204	195	217
ENSMUSG00000051617	Krt9	5.181	6.6e-13	7.3e-11	3	0	0	39	45	46	3	0	0	37	51	54
ENSMUSG00000041216	Clvs1	1.26	1.8e-13	2.1e-11	215	236	222	531	546	534	205	240	181	503	619	629
ENSMUSG00000041801	Phlda3	-1.86	3.9e-07	1.4e-05	3466	2844	2879	1460	316	754	3298	2896	2352	1384	359	888
ENSMUSG00000106037	Gm4332	1.556	1.4e-15	2.1e-13	303	247	241	606	837	883	288	252	197	574	949	1039
ENSMUSG00000031906	Smpd3	3.832	1.4e-29	5.5e-27	34	23	48	298	589	601	32	23	40	282	667	707
ENSMUSG00000097472	Gm26586	-2.594	2.1e-12	2.2e-10	102	100	112	18	23	11	97	102	92	17	26	13
ENSMUSG00000060206	Zfp462	1.277	8.5e-12	8.1e-10	189	218	201	423	518	532	180	222	164	401	587	626
ENSMUSG00000040152	Thbs1	-1.257	5.3e-15	7.3e-13	8789	12164	10228	4000	4197	4845	8363	12385	8356	3789	4756	5702
ENSMUSG00000060860	Ube2s	-2.453	4.5e-09	2.5e-07	630	432	438	166	31	76	600	440	358	158	36	90
ENSMUSG00000095891	Gm10717	2.022	3.9e-11	3.3e-09	119	141	314	627	928	776	113	144	258	594	1052	913
ENSMUSG00000024735	Prpf19	1.14	3e-10	2.2e-08	300	407	331	699	881	707	285	414	270	662	998	832
ENSMUSG00000030495	Slc7a10	2.072	5.1e-11	4.3e-09	28	34	46	137	138	182	27	35	38	130	157	214
ENSMUSG00000022594	Lynx1	1.399	4.6e-10	3.3e-08	143	112	161	366	310	420	136	114	132	347	351	494
ENSMUSG00000027405	Nop56	-1.07	1e-11	9.6e-10	1139	1203	1387	553	558	664	1084	1225	1133	524	632	781
ENSMUSG00000073802	Cdkn2b	1.034	2.5e-10	1.9e-08	657	490	611	1107	1171	1320	625	499	499	1049	1327	1553
ENSMUSG00000048385	Scrt1	5.548	8.2e-12	7.8e-10	0	0	2	53	35	31	0	0	2	50	40	37
ENSMUSG00000105954	Gm42793	-5.238	8.7e-12	8.2e-10	24	52	42	1	0	2	23	53	34	1	0	2
ENSMUSG00000031765	Mt1	-1.033	1.2e-09	7.7e-08	1652	1495	1320	598	726	858	1572	1522	1078	566	823	1010
ENSMUSG00000029209	Gnpda2	-1.195	2.1e-09	1.2e-07	648	637	764	217	343	333	617	649	624	205	389	392
ENSMUSG00000031262	Cenpi	-1.878	8.6e-15	1.1e-12	695	540	464	210	122	131	661	550	379	199	139	154
ENSMUSG00000040521	Tsfm	-1.123	1.8e-10	1.4e-08	734	789	627	379	295	314	698	803	512	359	334	370
ENSMUSG00000031590	Frg1	-1.011	8.3e-10	5.5e-08	1766	1883	2130	894	823	1148	1680	1917	1740	847	933	1351
ENSMUSG00000001802	Lrp3	1.553	8.9e-11	7.2e-09	85	92	110	306	232	305	81	94	90	290	263	359
ENSMUSG00000039942	Ptger4	1.006	7.4e-10	5e-08	597	725	716	1150	1510	1433	568	738	585	1089	1711	1686
ENSMUSG00000002006	Pdzd4	1.967	1.5e-11	1.4e-09	38	52	38	150	159	194	36	53	31	142	180	228
ENSMUSG00000052837	Junb	-1.023	5.8e-11	4.8e-09	1417	1174	1153	668	577	597	1348	1195	942	633	654	703
ENSMUSG00000005413	Hmox1	-1.097	9.2e-11	7.3e-09	950	829	839	363	373	486	904	844	685	344	423	572
ENSMUSG00000024974	Smc3	-1.072	2.6e-11	2.3e-09	1043	1078	1191	442	552	580	992	1098	973	419	625	682
ENSMUSG00000022610	Mapk12	1.322	2.6e-08	1.2e-06	105	191	192	384	403	431	100	194	157	364	457	507
ENSMUSG00000029664	Tfpi2	-2.062	2.2e-11	2e-09	134	140	183	34	31	44	127	143	150	32	35	52
ENSMUSG00000024847	Aip	-1.068	2.3e-09	1.4e-07	784	1003	898	471	339	471	746	1021	734	446	385	554
ENSMUSG00000050666	Vstm4	1.177	1.1e-08	5.7e-07	282	368	205	635	649	653	268	375	167	602	735	769
ENSMUSG00000085151	1110018N20Rik	3.585	1.5e-14	2e-12	13	4	10	143	80	93	12	4	8	136	91	110
ENSMUSG00000000632	Sez6	3.804	9.3e-12	8.7e-10	2	9	3	90	53	55	2	9	2	85	60	65
ENSMUSG00000022367	Has2	-1.109	3.4e-10	2.5e-08	677	887	825	330	348	428	644	903	674	313	395	503
ENSMUSG00000028670	Lypla2	-1.262	1.5e-10	1.1e-08	552	441	418	192	175	220	525	449	341	182	199	259
ENSMUSG00000038510	Rpf2	-1.001	2.1e-10	1.6e-08	1664	1841	2103	818	944	1038	1583	1875	1718	775	1070	1221
ENSMUSG00000026204	Ptprn	1.421	1.9e-17	3.6e-15	737	740	783	2179	1587	2284	701	753	640	2064	1799	2688
ENSMUSG00000027997	Casp6	-1.331	6.6e-11	5.4e-09	443	357	369	176	143	146	422	364	301	167	162	172
ENSMUSG00000069895	Atxn1l	-1.495	9.3e-09	4.8e-07	343	302	256	74	137	108	326	308	209	70	155	127
ENSMUSG00000024112	Cacna1h	2.335	5.8e-17	1e-14	49	75	58	391	245	284	47	76	47	371	278	334
ENSMUSG00000006235	Epor	1.439	1.1e-10	8.6e-09	90	131	130	316	315	320	86	133	106	299	357	377
ENSMUSG00000086237	Gm15591	-2.163	4.8e-11	4.1e-09	139	124	133	29	20	39	132	126	109	27	23	46
ENSMUSG00000027950	Chrnb2	1.779	1.6e-18	3.2e-16	171	175	185	747	491	585	163	178	151	708	557	688
ENSMUSG00000032491	Nradd	-1.081	5.9e-11	4.9e-09	879	806	699	346	376	405	836	821	571	328	426	476
ENSMUSG00000073468	Sft2d1	-1.456	3e-09	1.7e-07	283	333	269	131	79	113	269	339	220	124	90	133
ENSMUSG00000097799	Gm26899	-1.208	2.3e-08	1.1e-06	523	488	556	223	293	162	498	497	454	211	332	191
ENSMUSG00000008450	Nutf2	-1.075	3.1e-10	2.2e-08	926	817	894	356	501	393	881	832	730	337	568	463
ENSMUSG00000028351	Brinp1	4.148	4.7e-10	3.4e-08	1	0	7	43	48	53	1	0	6	41	54	62
ENSMUSG00000067931	Zfp948	-1.163	4.3e-11	3.7e-09	614	849	792	358	328	321	584	864	647	339	372	378
ENSMUSG00000046223	Plaur	-1.288	1.1e-11	9.8e-10	939	740	1003	422	287	388	893	753	820	400	326	457
ENSMUSG00000020537	Drg2	-1.05	1.8e-10	1.4e-08	1034	768	889	453	415	432	984	782	726	429	470	508
ENSMUSG00000023988	Bysl	1.005	2.3e-12	2.4e-10	5964	5942	5234	10359	12076	11969	5675	6050	4276	9814	13685	14085
ENSMUSG00000074934	Grem1	-1.66	2.6e-21	6.4e-19	1690	1307	1984	508	506	561	1608	1331	1621	481	574	660
ENSMUSG00000085939	Cd63-ps	-1.115	1.6e-10	1.2e-08	794	614	751	295	342	359	756	625	614	279	388	422
ENSMUSG00000033768	Nrxn2	4.122	5.9e-12	5.7e-10	0	6	7	46	93	95	0	6	6	43	105	111
ENSMUSG00000048772	Tmem53	-1.376	1.1e-09	6.8e-08	335	342	411	106	167	145	319	348	336	100	189	171
ENSMUSG00000013646	Sh3bp5l	1.048	2.6e-09	1.5e-07	319	411	421	695	883	800	303	418	344	658	1000	941
ENSMUSG00000028439	Fam219a	1.757	4.3e-11	3.7e-09	57	61	55	220	161	205	54	62	45	208	183	241
ENSMUSG00000024869	Nudt8	-1.138	9.6e-12	8.9e-10	631	592	550	264	274	267	600	603	449	250	311	314
ENSMUSG00000028066	Pmf1	-1.324	7.5e-07	2.4e-05	393	332	388	177	85	182	374	338	317	168	97	214
ENSMUSG00000048603	Gm9828	-1.422	5.6e-08	2.5e-06	401	304	388	160	84	163	382	310	317	152	96	192
ENSMUSG00000007946	Phox2a	1.186	2.6e-08	1.2e-06	229	312	178	563	585	493	218	318	145	533	663	580
ENSMUSG00000061232	H2-K1	1.46	6.3e-12	6.1e-10	340	384	584	968	1252	1374	323	391	478	917	1419	1617
ENSMUSG00000074412	Gm10689	1.026	2.5e-10	1.8e-08	436	378	416	738	920	847	415	385	340	699	1042	997
ENSMUSG00000060601	Nr1h2	-1.832	1.6e-09	9.7e-08	414	328	278	130	53	105	394	334	227	123	60	123
ENSMUSG00000101603	Gm28730	1.193	7.7e-09	4e-07	160	229	237	479	535	417	152	233	194	454	606	491
ENSMUSG00000027394	Ttl	1.097	1.9e-10	1.5e-08	475	512	387	1111	996	836	452	521	316	1053	1129	984
ENSMUSG00000027612	Mmp24	1.167	4e-09	2.3e-07	222	291	193	473	548	565	211	296	157	448	621	665
ENSMUSG00000036646	Man1b1	1.1	4e-09	2.3e-07	250	329	286	520	700	636	238	335	234	493	793	748
ENSMUSG00000027230	Creb3l1	-1.116	1.1e-11	9.8e-10	626	596	624	285	267	299	596	607	510	270	303	352
ENSMUSG00000028234	Rps20	1.124	4e-14	4.9e-12	11273	11599	11318	20956	27098	26463	10726	11810	9246	19853	30709	31143
ENSMUSG00000047507	Baiap3	1.256	1.2e-09	7.7e-08	152	153	183	336	381	450	145	156	150	318	432	529
ENSMUSG00000078765	U2af1l4	-1.015	3.3e-10	2.4e-08	940	1008	934	482	400	542	894	1026	763	457	454	638
ENSMUSG00000097451	Rian	-1.048	1.2e-09	7.7e-08	890	767	735	341	452	363	847	781	600	323	512	427
ENSMUSG00000041609	Ccdc64	1.669	1.1e-10	8.9e-09	84	73	74	300	235	199	80	74	60	284	266	235
ENSMUSG00000019868	Vta1	-1.008	1e-09	6.8e-08	1179	936	1221	621	513	525	1122	953	998	588	582	618
ENSMUSG00000024109	Nrxn1	5.015	8.3e-18	1.6e-15	1	4	16	120	263	316	1	4	14	113	298	371
ENSMUSG00000004558	Ndrg2	1.276	5.7e-10	4e-08	148	131	181	356	364	391	141	133	148	337	413	460
ENSMUSG00000075015	Gm10801	2.264	2.4e-10	1.8e-08	945	1188	3167	6268	10258	8926	899	1210	2589	5938	11625	10504
ENSMUSG00000097414	B130046B21Rik	-1.781	2.5e-05	0.00046	241	197	223	114	23	55	229	201	182	108	27	65
ENSMUSG00000030254	Rad18	-1.21	8.2e-11	6.7e-09	458	417	531	201	194	212	436	425	434	190	220	250
ENSMUSG00000063524	Eno1	-1.695	3e-12	3.1e-10	3939	2737	3065	1343	605	1061	3748	2787	2504	1272	686	1249
ENSMUSG00000004885	Crabp2	-1.784	1.6e-09	9.7e-08	162	165	213	46	41	68	154	168	174	44	47	80
ENSMUSG00000062456	Rpl9-ps6	1.071	8.3e-10	5.5e-08	327	319	301	587	775	628	311	325	246	556	878	739
ENSMUSG00000029431	B3gnt4	1.589	2.9e-09	1.7e-07	75	67	78	168	260	232	71	68	64	159	295	273
ENSMUSG00000030623	Prss23os	-2.057	1.1e-06	3.3e-05	147	117	102	45	12	31	140	119	83	43	14	36
ENSMUSG00000048616	Nog	1.319	5.6e-08	2.5e-06	366	487	209	830	984	839	348	496	170	786	1115	988
ENSMUSG00000060950	Trmt61a	1.142	9.1e-11	7.3e-09	253	227	213	481	534	516	241	231	174	456	605	607
ENSMUSG00000034681	Rnps1	-1.59	3.3e-10	2.4e-08	453	312	351	149	85	137	431	318	287	141	97	161
ENSMUSG00000081049	Rps24-ps3	1.252	1.5e-12	1.6e-10	411	415	361	747	1081	1000	391	423	295	708	1225	1177
ENSMUSG00000097397	Gm16861	-2.589	3e-07	1.1e-05	87	69	87	25	4	11	83	70	71	24	5	13
ENSMUSG00000022223	Sdr39u1	-1.282	8.9e-10	5.9e-08	363	394	292	138	147	145	345	401	238	131	167	171
ENSMUSG00000033952	Aspm	-1.308	5.8e-08	2.6e-06	315	395	355	100	145	184	300	402	290	95	164	216
ENSMUSG00000039385	Cdh6	-1.74	3.7e-07	1.3e-05	217	172	148	67	29	65	207	175	121	64	33	76
ENSMUSG00000002043	Trappc6a	-1.052	7.7e-10	5.1e-08	718	635	776	339	384	303	683	647	634	321	435	357
ENSMUSG00000044820	AY074887	-1.861	3.5e-08	1.6e-06	142	141	154	58	24	38	135	144	126	55	28	45
ENSMUSG00000031129	Slc9a9	1.015	4.4e-09	2.5e-07	396	468	365	836	938	712	377	476	298	792	1063	838
ENSMUSG00000038296	Galnt18	1.332	8.6e-09	4.5e-07	118	174	108	358	315	336	112	177	88	339	357	396
ENSMUSG00000046897	Zfp740	-1.247	6.8e-09	3.7e-07	421	440	309	184	165	145	401	448	252	174	187	171
ENSMUSG00000050138	Kcnk12	5.303	9.9e-11	7.9e-09	0	1	1	40	26	33	0	1	1	38	30	39
ENSMUSG00000025478	Dpysl4	3.255	6.8e-11	5.6e-09	9	8	4	92	67	48	9	8	3	87	76	57
ENSMUSG00000037872	Ackr1	6.408	5.7e-12	5.6e-10	0	0	1	29	32	63	0	0	1	27	37	73
ENSMUSG00000039059	Hrh3	5.413	5.9e-13	6.5e-11	1	0	2	75	32	47	1	0	2	71	37	56
ENSMUSG00000102211	Gm37490	2.228	1.4e-11	1.3e-09	21	23	24	114	98	108	20	23	20	108	111	127
ENSMUSG00000095280	Gm21738	2.105	1.8e-09	1.1e-07	207	256	689	1329	2052	1576	197	261	564	1259	2325	1855
ENSMUSG00000078307	AI593442	3.486	1.4e-08	6.7e-07	1	10	3	36	64	58	1	10	2	34	72	68
ENSMUSG00000029249	Rest	-1.029	1.6e-07	6.3e-06	1382	1557	1443	973	597	578	1315	1585	1179	922	677	681
ENSMUSG00000037907	Ankrd13b	1.253	4.4e-10	3.1e-08	153	183	136	388	380	359	146	186	111	368	431	423
ENSMUSG00000050721	Plekho2	-1.25	3.1e-08	1.4e-06	326	411	390	130	203	140	310	418	319	123	230	165
ENSMUSG00000026851	BC005624	-1.312	6.4e-09	3.4e-07	366	291	362	110	133	166	348	296	296	104	151	195
ENSMUSG00000087612	A230005M16Rik	-2.414	1.4e-09	8.6e-08	295	205	179	69	19	39	281	209	146	66	22	46
ENSMUSG00000022346	Myc	-1.194	4.5e-07	1.5e-05	422	464	375	139	157	254	402	472	306	132	178	298
ENSMUSG00000027082	Tfpi	-1.207	4.8e-09	2.7e-07	411	412	431	136	207	199	391	420	352	129	234	234
ENSMUSG00000035067	Xkr6	1.703	2.7e-10	2e-08	45	54	60	187	160	172	43	55	49	177	181	202
ENSMUSG00000102861	Gm37637	-4.468	9.1e-11	7.3e-09	35	31	43	0	3	2	33	32	35	0	3	2
ENSMUSG00000024222	Fkbp5	1.03	7.3e-10	4.9e-08	334	311	299	580	697	652	318	317	244	549	790	767
ENSMUSG00000038943	Prc1	-1.03	1.4e-08	6.7e-07	1614	1299	1424	598	625	900	1536	1323	1163	566	708	1059
ENSMUSG00000031490	Eif4ebp1	-1.312	4.9e-11	4.2e-09	5378	3862	4695	2188	1319	2107	5117	3932	3836	2073	1495	2479
ENSMUSG00000024556	Me2	-1.014	3.6e-09	2.1e-07	928	1003	1204	428	552	570	883	1021	984	405	626	671
ENSMUSG00000026727	Rsu1	-1.057	1.1e-08	5.7e-07	770	579	627	370	296	285	733	590	512	351	335	335
ENSMUSG00000031028	Tub	2.346	2e-09	1.2e-07	25	11	18	105	91	81	24	11	15	100	103	95
ENSMUSG00000049521	Cdc42ep1	-1.001	1e-06	3.1e-05	761	698	634	440	250	357	724	711	518	417	284	420
ENSMUSG00000029019	Nppb	5.878	4.1e-10	3e-08	0	0	1	33	26	26	0	0	1	31	30	31
ENSMUSG00000013701	Timm23	-1.437	1.3e-08	6.4e-07	277	191	279	101	84	91	264	195	228	96	95	107
ENSMUSG00000105987	AI506816	-1.345	4.6e-07	1.6e-05	286	248	305	139	71	120	272	253	249	132	81	141
ENSMUSG00000043670	Diras1	4.459	1.2e-13	1.4e-11	2	4	3	92	39	65	2	4	2	87	45	77
ENSMUSG00000041096	Tspyl2	-1.411	1.7e-07	6.7e-06	232	284	234	89	68	125	221	289	191	84	77	147
ENSMUSG00000008683	Rps15a	1.216	3.6e-13	4.2e-11	8124	7999	6931	13937	19800	19816	7730	8145	5662	13203	22439	23320
ENSMUSG00000027254	Map1a	1.438	3.2e-07	1.1e-05	67	140	102	321	286	233	64	143	83	304	324	275
ENSMUSG00000056222	Spock1	4.033	9.7e-17	1.7e-14	6	5	8	157	84	84	6	5	7	149	96	99
ENSMUSG00000025964	Adam23	1.676	3.7e-09	2.1e-07	50	58	60	226	160	153	48	59	49	214	182	180
ENSMUSG00000059159	Gm8129	1.325	1.4e-08	7.1e-07	107	107	117	228	329	273	102	109	96	216	373	321
ENSMUSG00000020232	Hmg20b	-1.115	7.2e-10	4.9e-08	504	441	424	207	208	217	480	449	346	196	236	255
ENSMUSG00000060126	Tpt1	1.14	2.3e-15	3.3e-13	16471	13926	14648	35503	30424	33373	15672	14180	11967	33634	34479	39275
ENSMUSG00000053038	Gm6180	-4.389	1.4e-09	8.7e-08	45	24	35	2	0	3	43	24	29	2	0	3
ENSMUSG00000011096	Akt1s1	-1.325	1.8e-06	4.9e-05	364	346	278	180	80	134	346	352	227	171	91	158
ENSMUSG00000075014	Gm10800	2.205	1.1e-09	7.4e-08	2165	2716	7389	14182	23709	18699	2060	2765	6038	13435	26869	22006
ENSMUSG00000048495	Tyw5	-1.091	1.2e-09	7.5e-08	471	513	510	208	229	263	448	522	417	197	260	309
ENSMUSG00000104465	BC002189	1.506	1.7e-12	1.8e-10	179	227	169	572	643	420	170	231	138	542	729	495
ENSMUSG00000010609	Psen2	1.06	2.3e-08	1.1e-06	213	304	256	578	556	479	203	309	209	548	630	564
ENSMUSG00000047793	Sned1	1.555	9.3e-09	4.8e-07	85	102	65	289	264	192	81	104	53	274	299	226
ENSMUSG00000063884	Ptcd3	-1.452	1.6e-11	1.4e-09	753	934	1104	420	240	360	716	951	902	398	272	424
ENSMUSG00000035722	Abca7	1.104	2e-09	1.2e-07	215	222	187	410	469	466	205	226	153	388	532	548
ENSMUSG00000039137	Whrn	-1.07	9.4e-07	2.9e-05	540	640	652	371	199	303	514	652	533	352	226	357
ENSMUSG00000003863	Ppfia3	2.203	1.6e-07	6.3e-06	35	16	13	107	109	76	33	16	10	101	123	90
ENSMUSG00000021692	Dimt1	-1.262	3e-07	1.1e-05	322	302	380	100	132	185	306	308	311	95	150	217
ENSMUSG00000085675	Gm12022	-6.35	5.4e-11	4.5e-09	54	26	26	1	0	0	52	26	21	1	0	0
ENSMUSG00000102657	Gm37899	-1.944	1.4e-22	3.7e-20	1724	2269	2899	638	498	654	1640	2310	2369	604	565	770
ENSMUSG00000005338	Cadm3	4.108	4.4e-07	1.5e-05	0	0	7	33	31	59	0	0	6	31	35	69
ENSMUSG00000026764	Kif5c	1.225	6.2e-08	2.7e-06	105	155	156	327	293	354	100	158	128	310	332	417
ENSMUSG00000030697	Ppp4c	-1.253	4.5e-12	4.5e-10	2002	1610	1403	633	623	847	1905	1639	1146	600	706	996
ENSMUSG00000050708	Ftl1	-1.192	7e-11	5.7e-09	44754	37527	42011	20306	13124	20976	42583	38210	34321	19237	14873	24685
ENSMUSG00000078949	R3hdml	-2.014	3.7e-17	6.8e-15	728	487	456	173	119	122	693	496	372	164	135	144
ENSMUSG00000087405	Gm14232	1.746	2.7e-08	1.2e-06	37	41	52	180	117	140	35	42	43	171	133	165
ENSMUSG00000047832	Cdca4	-1.015	1.4e-08	6.9e-07	669	526	562	293	258	318	637	536	459	278	293	374
ENSMUSG00000019817	Plagl1	-1.197	4.4e-13	4.9e-11	3727	2873	2621	1343	1228	1452	3546	2925	2141	1272	1392	1709
ENSMUSG00000021364	Elovl2	4.663	5.3e-11	4.4e-09	4	1	0	28	49	68	4	1	0	26	55	80
ENSMUSG00000025574	Tk1	-1.032	6.9e-08	3e-06	592	536	575	259	228	345	563	546	470	245	259	406
ENSMUSG00000054555	Adam12	1.15	6.2e-08	2.7e-06	134	200	181	382	345	416	127	204	148	362	391	490
ENSMUSG00000053647	Gper1	1.196	2.5e-07	9.1e-06	116	160	153	261	346	375	110	163	125	247	392	441
ENSMUSG00000108077	RP23-178I17.1	8.631	8.5e-14	1e-11	0	0	0	71	57	20	0	0	0	67	64	24
ENSMUSG00000033981	Gria2	6.144	1.9e-22	4.9e-20	4	1	1	75	247	161	4	1	1	71	279	189
ENSMUSG00000084319	Tpt1-ps3	1.373	1.9e-09	1.1e-07	295	162	219	700	536	517	281	165	179	663	607	609
ENSMUSG00000001240	Ramp2	2.4	1.5e-06	4.3e-05	3	18	23	79	68	85	3	18	19	75	77	100
ENSMUSG00000025283	Sat1	-1.454	7.9e-12	7.6e-10	3002	3313	4259	1309	895	1655	2856	3373	3480	1240	1015	1947
ENSMUSG00000096385	Gm11168	2.354	8.5e-07	2.7e-05	8	9	28	83	77	75	8	9	24	79	87	88
ENSMUSG00000097242	Gm16907	-1.5	3.7e-05	0.00063	274	274	292	170	47	80	261	279	239	161	54	95
ENSMUSG00000026039	Sgol2a	-1.038	1.1e-07	4.4e-06	443	504	501	287	196	223	421	513	409	272	222	262
ENSMUSG00000085274	BC046401	2.635	8.2e-09	4.3e-07	16	7	10	87	55	60	15	7	8	83	63	71
ENSMUSG00000086107	Gm16312	-1.96	1.2e-05	0.00025	145	104	110	16	19	57	138	106	90	15	22	66
ENSMUSG00000045545	Krt14	6.011	6.8e-10	4.6e-08	0	0	1	34	16	45	0	0	1	32	18	52
ENSMUSG00000034311	Kif4	-1.049	1.3e-08	6.3e-07	473	485	466	220	268	200	450	494	381	208	304	236
ENSMUSG00000041734	Kirrel	-1.021	6.4e-09	3.4e-07	792	1046	790	481	376	439	754	1065	645	456	426	517
ENSMUSG00000106175	AL662809.1	-1.981	2.3e-07	8.7e-06	130	123	78	40	21	23	124	125	63	38	24	27
ENSMUSG00000046718	Bst2	-1.642	4.9e-08	2.2e-06	170	162	136	37	47	66	162	165	111	35	53	77
ENSMUSG00000055188	Rbm3os	-2.339	1.1e-08	5.7e-07	103	61	72	18	17	12	98	62	59	17	19	14
ENSMUSG00000025586	Cpeb1	1.404	6.3e-10	4.4e-08	128	169	158	307	479	417	122	172	129	291	543	491
ENSMUSG00000044712	Slc38a6	1.018	1.3e-07	5.2e-06	427	683	655	1019	1215	1338	406	695	535	965	1377	1574
ENSMUSG00000003410	Elavl3	3.844	1.2e-09	7.8e-08	3	2	2	31	49	34	3	2	2	29	55	40
ENSMUSG00000028179	Cth	-2.152	3.4e-08	1.5e-06	85	100	86	18	30	12	81	102	70	17	34	15
ENSMUSG00000046402	Rbp1	1.483	8.1e-07	2.6e-05	98	63	48	196	169	219	93	64	39	186	192	258
ENSMUSG00000038482	Tfdp1	-1.753	0.00027	0.0033	134	116	116	66	11	31	128	118	95	63	13	37
ENSMUSG00000037664	Cdkn1c	1.187	2.1e-08	9.9e-07	519	320	305	897	738	972	494	326	249	850	837	1144
ENSMUSG00000028644	Ermap	-1.196	3.1e-08	1.4e-06	319	294	319	160	113	134	304	299	261	152	128	158
ENSMUSG00000046167	Gldn	2.542	1.2e-08	6.1e-07	16	11	9	68	89	51	15	11	7	64	101	60
ENSMUSG00000025875	Tspan17	1.026	1.5e-08	7.4e-07	205	253	256	516	469	469	195	258	209	489	532	552
ENSMUSG00000018845	Unc45b	1.003	9.8e-10	6.4e-08	716	793	669	1672	1489	1206	681	807	546	1584	1687	1420
ENSMUSG00000071866	Ppia	-1.125	1e-09	6.7e-08	11727	8981	8910	5053	3416	5110	11158	9145	7279	4787	3872	6013
ENSMUSG00000107335	Gm43372	-2.545	2.8e-05	0.0005	70	72	66	3	5	27	67	73	54	3	6	31
ENSMUSG00000062328	Rpl17	1.075	3e-11	2.6e-09	6751	7124	6748	11449	15204	16780	6423	7254	5513	10846	17230	19747
ENSMUSG00000068615	Gjd2	4.355	1.1e-08	5.6e-07	0	3	1	21	29	45	0	3	1	20	33	52
ENSMUSG00000046179	E2f8	-1.231	8.4e-07	2.7e-05	318	302	294	86	138	165	303	308	240	81	156	194
ENSMUSG00000001552	Jup	-1.024	1.4e-07	5.5e-06	496	435	437	270	213	191	472	443	357	256	241	225
ENSMUSG00000027327	1700037H04Rik	-1.001	7.6e-08	3.2e-06	618	469	468	250	274	252	588	478	382	237	311	297
ENSMUSG00000051627	Hist1h1e	-2.296	0.00015	0.0021	86	88	70	1	30	19	82	90	57	1	33	22
ENSMUSG00000086567	Gm2830	1.309	1.9e-12	2e-10	742	972	698	1619	2416	1942	706	990	570	1534	2738	2286
ENSMUSG00000050628	Ubald2	1.114	9.6e-08	4e-06	162	196	154	326	433	352	154	200	126	309	491	414
ENSMUSG00000051065	Mb21d2	1.027	5.1e-09	2.8e-07	238	248	222	514	451	479	226	253	181	487	511	564
ENSMUSG00000039985	Fam60a	-2.35	6.2e-10	4.3e-08	77	79	67	16	15	13	73	80	55	15	17	15
ENSMUSG00000001227	Sema6b	1.232	1.3e-08	6.3e-07	122	118	124	319	254	281	116	120	101	302	288	331
ENSMUSG00000001507	Itga3	-1.388	9.8e-05	0.0014	266	250	258	159	45	93	253	255	211	151	51	109
ENSMUSG00000086347	Gm11626	-2.911	1.8e-07	6.8e-06	50	54	51	9	1	10	48	55	42	9	1	12
ENSMUSG00000037876	Jmjd1c	-1.028	9.3e-10	6.1e-08	2640	3707	3238	1328	1686	1684	2512	3774	2645	1258	1911	1982
ENSMUSG00000038517	Tbkbp1	2.959	5.3e-08	2.4e-06	10	3	6	50	37	67	10	3	5	47	42	79
ENSMUSG00000030757	Zkscan2	4.874	2.7e-18	5.4e-16	0	8	12	304	129	154	0	8	10	288	147	182
ENSMUSG00000086993	Rsf1os2	-2.14	7.5e-09	4e-07	98	89	71	14	23	21	93	91	58	13	26	25
ENSMUSG00000030730	Atp2a1	-1.981	9.1e-16	1.4e-13	2396	2030	1340	668	355	438	2280	2067	1094	633	403	516
ENSMUSG00000074657	Kif5a	2.304	0.00015	0.002	1	17	26	62	72	85	1	17	22	59	82	100
ENSMUSG00000021037	Ahsa1	-1.118	5.3e-09	2.9e-07	1301	967	1285	605	410	622	1238	985	1050	573	465	732
ENSMUSG00000046230	Vps13a	-1.318	2.2e-07	8.2e-06	253	242	188	83	110	81	241	246	153	79	124	95
ENSMUSG00000095547	Gm10719	2.342	8.5e-08	3.6e-06	19	17	50	103	188	146	18	17	42	97	213	172
ENSMUSG00000047238	Mageh1	1.28	1.3e-08	6.3e-07	143	135	138	347	402	261	136	137	113	329	455	308
ENSMUSG00000060803	Gstp1	-1.142	5.7e-08	2.5e-06	2682	2197	2870	1359	765	1388	2552	2237	2345	1288	867	1633
ENSMUSG00000031879	Fam96b	-1.061	1.9e-09	1.2e-07	1214	887	940	557	421	480	1155	903	768	528	477	565
ENSMUSG00000078484	Klhl17	1.163	2.5e-05	0.00046	83	136	188	335	296	279	79	138	154	317	336	328
ENSMUSG00000097993	Ptprv	1.172	7.3e-08	3.1e-06	128	162	130	359	314	276	122	165	106	340	356	325
ENSMUSG00000046058	Eid2	1.175	3.5e-10	2.5e-08	392	446	322	775	1064	783	373	454	263	734	1206	922
ENSMUSG00000042401	Crtac1	4.689	2.2e-08	1.1e-06	1	0	2	21	25	47	1	0	2	20	29	55
ENSMUSG00000106967	Gm42477	-2.971	1.5e-07	6e-06	63	40	39	10	3	5	60	41	32	10	3	6
ENSMUSG00000039579	Grin3a	1.889	5.3e-06	0.00012	11	36	38	110	103	101	10	37	31	104	117	119
ENSMUSG00000001120	Pcbp3	1.251	6.7e-08	2.9e-06	119	97	107	284	221	263	113	99	87	269	251	309
ENSMUSG00000056501	Cebpb	1.082	5.4e-07	1.8e-05	151	221	179	456	379	335	144	225	146	432	429	394
ENSMUSG00000091028	Gm10722	2.311	4e-05	0.00069	5	10	33	57	96	88	5	10	28	54	109	104
ENSMUSG00000067870	Rpl31-ps8	1.147	2.3e-07	8.4e-06	146	148	127	269	377	289	139	151	104	255	427	340
ENSMUSG00000025422	Agap2	3.25	9.1e-07	2.8e-05	6	0	7	59	40	30	6	0	6	56	45	36
ENSMUSG00000107021	Gm42853	8.293	4.6e-12	4.6e-10	0	0	0	17	60	39	0	0	0	16	68	46
ENSMUSG00000022064	Pibf1	-1.102	9.3e-06	0.0002	396	316	334	218	113	157	377	322	273	207	128	185
ENSMUSG00000022176	Rem2	-2.055	9.3e-07	2.9e-05	87	83	88	32	9	21	83	85	72	30	11	25
ENSMUSG00000040680	Kremen2	1.056	3.8e-07	1.3e-05	206	192	162	360	340	463	196	195	132	341	386	545
ENSMUSG00000053398	Phgdh	-1.24	6e-10	4.2e-08	1088	795	795	473	360	302	1035	810	649	448	408	356
ENSMUSG00000105975	Gm42609	-2.179	3.7e-06	9.1e-05	97	95	57	6	24	24	92	97	46	6	27	28
ENSMUSG00000103899	Gm37940	-3.981	1.1e-08	5.6e-07	36	23	35	3	1	2	34	23	29	3	1	2
ENSMUSG00000006678	Pola1	-1.065	5.5e-08	2.5e-06	379	390	431	159	197	216	361	397	352	151	223	254
ENSMUSG00000017639	Rab11fip4	2.884	1.2e-07	4.9e-06	5	4	11	38	44	66	5	4	9	36	50	77
ENSMUSG00000025290	Rps24	1.148	1.1e-11	9.7e-10	10445	11799	10736	18633	26743	27704	9938	12014	8771	17652	30307	32603
ENSMUSG00000004642	Slbp	-1.139	2.2e-07	8.2e-06	480	337	422	210	145	207	457	343	345	199	165	244
ENSMUSG00000023919	Cenpq	-1.154	2.1e-06	5.7e-05	391	313	299	120	129	201	372	319	244	114	146	236
ENSMUSG00000005575	Ube2m	-1.381	1.9e-05	0.00037	1302	1182	1187	757	200	454	1239	1204	970	717	227	534
ENSMUSG00000016200	Syt14	1.163	1.7e-07	6.5e-06	142	115	129	293	246	323	135	117	105	278	279	380
ENSMUSG00000021957	Tkt	-1.246	2.5e-08	1.2e-06	238	246	253	115	96	99	226	250	207	109	109	117
ENSMUSG00000045165	AI467606	-1.316	1.1e-05	0.00024	201	207	229	99	108	49	191	211	187	94	122	58
ENSMUSG00000048706	Lurap1l	-1.079	1.8e-07	7e-06	490	345	447	176	198	231	466	351	365	167	224	272
ENSMUSG00000058773	Hist1h1b	-3.698	8.4e-08	3.5e-06	24	41	35	3	5	0	23	42	29	3	5	0
ENSMUSG00000066232	Ipo7	-1.601	5.9e-12	5.8e-10	436	588	357	175	154	126	415	599	291	166	175	149
ENSMUSG00000067212	H2-T23	2.501	1.4e-07	5.8e-06	4	13	16	55	75	56	4	13	13	52	85	66
ENSMUSG00000087338	Scpep1os	-3.524	4.4e-09	2.5e-07	37	32	40	2	4	3	35	33	33	2	5	3
ENSMUSG00000015568	Lpl	2.073	7.3e-14	8.8e-12	72	103	68	448	314	261	68	105	55	425	356	307
ENSMUSG00000061479	Snrpa	-1.26	1e-11	9.5e-10	982	641	788	333	321	353	934	653	644	315	364	415
ENSMUSG00000067058	Rps15a-ps5	1.51	4.4e-07	1.5e-05	48	64	49	116	173	171	46	65	40	110	196	201
ENSMUSG00000002459	Rgs20	4.291	8.3e-11	6.7e-09	0	4	8	38	98	107	0	4	7	36	111	126
ENSMUSG00000009145	Dqx1	1.275	2e-06	5.3e-05	590	721	1508	2409	2184	2225	561	734	1233	2282	2475	2619
ENSMUSG00000020684	Rasl10b	4.857	9.7e-14	1.2e-11	0	4	4	43	68	118	0	4	3	41	77	138
ENSMUSG00000039699	Batf2	-1.757	7.3e-08	3.1e-06	123	103	110	40	24	36	117	105	90	38	27	42
ENSMUSG00000019894	Slc6a15	-4.667	7e-08	3e-06	37	14	28	0	2	1	35	14	23	0	2	1
ENSMUSG00000022428	Cby1	-1.224	6.3e-07	2.1e-05	283	223	213	121	92	95	269	227	174	115	104	112
ENSMUSG00000024912	Fosl1	-1.246	1e-11	9.5e-10	1312	945	920	397	429	513	1248	962	751	376	486	603
ENSMUSG00000003378	Grik5	1.147	4.8e-07	1.6e-05	123	152	132	354	243	307	117	155	108	335	276	361
ENSMUSG00000047013	Fbxo41	3.411	1.9e-05	0.00036	1	0	9	51	38	23	1	0	8	48	43	28
ENSMUSG00000079834	Tmlhe	-1.322	1e-05	0.00021	292	217	256	94	64	148	278	221	209	89	73	173
ENSMUSG00000080058	Gm11175	-4.559	4.8e-12	4.7e-10	164	131	54	11	1	2	156	133	43	11	1	3
ENSMUSG00000027313	Chac1	-1.221	6.8e-07	2.2e-05	406	287	326	192	119	126	386	292	266	182	135	149
ENSMUSG00000028051	Hcn3	3.034	2e-12	2.1e-10	15	10	15	152	96	74	14	10	12	144	109	88
ENSMUSG00000041046	Ramp3	1.094	1.6e-06	4.5e-05	191	160	124	381	282	354	182	163	101	361	320	416
ENSMUSG00000104524	Gm37333	1.654	7e-09	3.7e-07	60	69	88	191	295	194	57	70	72	181	334	229
ENSMUSG00000031822	Gse1	-1.023	3.8e-09	2.2e-07	1848	1600	1284	704	899	725	1758	1629	1049	667	1019	853
ENSMUSG00000079546	Gm11146	2.106	3.1e-06	7.7e-05	17	32	10	61	89	108	16	33	8	58	101	127
ENSMUSG00000070729	Gm12966	-4.296	1.2e-08	5.8e-07	33	25	22	1	2	1	31	25	18	1	2	1
ENSMUSG00000096433	Gm4944	1.294	2.4e-06	6.2e-05	115	82	73	183	270	212	110	84	59	173	306	249
ENSMUSG00000008958	Vps72	-2.468	6.2e-20	1.4e-17	955	516	593	140	86	146	909	525	484	133	98	172
ENSMUSG00000027985	Lef1	1.305	7.4e-07	2.4e-05	85	98	75	249	165	226	81	100	61	236	187	266
ENSMUSG00000010205	Raver1	-1.328	2.5e-06	6.4e-05	221	162	197	95	55	81	210	165	161	90	63	95
ENSMUSG00000024393	Prrc2a	-1.558	6e-10	4.1e-08	816	565	549	276	138	241	777	575	448	262	157	284
ENSMUSG00000051378	Kif18b	-1.015	3.6e-06	8.7e-05	450	400	367	148	203	250	428	407	300	140	230	294
ENSMUSG00000095913	Gm21844	-2.408	5.9e-07	2e-05	64	79	41	5	13	15	61	80	33	5	15	18
ENSMUSG00000100826	Snhg14	-1.113	2e-08	9.8e-07	391	590	529	239	222	237	372	601	432	226	252	279
ENSMUSG00000102331	Gm19938	5.508	5.3e-08	2.4e-06	0	1	0	27	13	25	0	1	0	26	15	29
ENSMUSG00000033316	Galnt9	2.919	3.1e-07	1.1e-05	8	1	8	47	50	37	8	1	7	45	57	44
ENSMUSG00000050164	Mchr1	3.121	1.9e-07	7.2e-06	7	5	1	28	48	48	7	5	1	26	54	56
ENSMUSG00000063550	Nup98	-1.452	3.1e-08	1.4e-06	172	144	160	58	57	59	164	147	131	55	65	69
ENSMUSG00000033287	Kctd17	-1.986	1.4e-07	5.5e-06	93	74	87	25	13	26	89	75	71	24	15	30
ENSMUSG00000032487	Ptgs2	-1.656	1.1e-15	1.6e-13	694	1192	1106	330	281	337	660	1214	904	313	319	397
ENSMUSG00000014030	Pax5	3.891	1.2e-06	3.5e-05	0	0	6	26	33	29	0	0	5	25	37	34
ENSMUSG00000074622	Mafb	1.076	1.5e-07	5.8e-06	228	254	191	501	545	377	217	259	156	475	617	444
ENSMUSG00000086083	Gm15829	-4.272	5e-07	1.7e-05	37	20	21	0	4	0	35	20	17	0	4	0
ENSMUSG00000054717	Hmgb2	-1.054	8.2e-08	3.5e-06	797	949	676	349	328	488	758	966	552	331	372	574
ENSMUSG00000103622	Gm38391	-2.007	6.3e-06	0.00014	137	200	130	27	71	18	130	204	106	25	80	22
ENSMUSG00000031808	Slc27a1	-1.184	2.7e-07	9.9e-06	267	225	245	121	93	110	254	229	200	115	106	129
ENSMUSG00000036438	Calm2	-1.196	7.1e-11	5.8e-09	11442	10351	14880	5999	4196	5815	10887	10539	12157	5683	4756	6843
ENSMUSG00000036242	3632451O06Rik	1.95	3.4e-15	5e-13	178	310	255	1142	1090	640	169	316	208	1082	1235	754
ENSMUSG00000024800	Rpp30	-1.023	2.3e-08	1.1e-06	763	727	989	450	336	433	726	740	808	426	381	510
ENSMUSG00000025758	Plk4	-1.105	5e-06	0.00011	289	317	326	104	138	190	275	323	266	98	157	223
ENSMUSG00000043618	Eif5al3-ps	-4.021	1.6e-07	6.2e-06	30	21	30	3	1	1	29	21	25	3	1	1
ENSMUSG00000025318	Jph3	2.998	3e-06	7.5e-05	0	11	12	79	70	36	0	11	10	75	79	43
ENSMUSG00000078591	Hs3st4	1.656	4.5e-06	0.0001	35	33	67	101	164	158	33	34	55	96	186	186
ENSMUSG00000001604	Tcea3	1.175	1.7e-06	4.7e-05	94	118	107	191	268	258	89	120	87	181	304	304
ENSMUSG00000046312	AI464131	1.562	1.6e-13	1.8e-11	208	244	256	861	718	510	198	248	209	816	814	601
ENSMUSG00000061983	Rps12	1.159	1.9e-11	1.7e-09	12611	12603	11341	20456	31637	29526	11999	12832	9265	19379	35853	34747
ENSMUSG00000094441	Zfp955a	-4.038	8.9e-08	3.7e-06	48	21	28	2	4	0	46	21	23	2	4	0
ENSMUSG00000011752	Pgam1	-1.801	4.6e-08	2.1e-06	250	146	237	76	38	68	238	149	194	72	43	80
ENSMUSG00000021086	Ccdc175	1.05	1.7e-06	4.8e-05	151	196	164	288	424	348	144	200	134	273	480	410
ENSMUSG00000021803	Cdhr1	2.158	0.00066	0.007	21	2	40	117	69	99	20	2	34	111	79	117
ENSMUSG00000012519	Mlkl	1.205	7.2e-06	0.00016	82	74	119	181	226	226	78	75	98	171	256	266
ENSMUSG00000031016	Wee1	-2.191	1e-06	3.2e-05	77	100	52	25	13	12	73	102	42	24	15	14
ENSMUSG00000032101	Ddx25	3.547	3.6e-17	6.6e-15	27	14	21	125	261	339	26	14	17	118	296	398
ENSMUSG00000064336	mt-Tf	2.707	7.2e-07	2.3e-05	2	19	16	112	61	69	2	19	13	106	69	81
ENSMUSG00000083195	Gm13567	4.793	4.3e-07	1.5e-05	2	0	0	29	28	12	2	0	0	28	32	14
ENSMUSG00000028538	St3gal3	1.131	1.4e-07	5.8e-06	188	186	164	302	467	410	179	189	134	286	529	482
ENSMUSG00000071341	Egr4	3.555	7.8e-06	0.00017	0	1	7	42	32	22	0	1	6	40	36	26
ENSMUSG00000060268	Gm1661	-3.682	1.6e-07	6.2e-06	23	34	31	3	4	0	22	35	25	3	4	0
ENSMUSG00000063698	Sfxn4	1.214	1e-06	3.2e-05	84	97	97	176	248	220	80	99	79	167	281	259
ENSMUSG00000035745	Grin3b	1.107	6.1e-07	2e-05	109	130	143	286	293	244	104	132	117	271	332	287
ENSMUSG00000098977	Gm27196	1.687	4.4e-07	1.5e-05	23	37	38	90	116	111	22	38	31	85	131	131
ENSMUSG00000038319	Kcnh2	1.362	3.7e-07	1.3e-05	193	165	94	313	469	382	184	168	76	296	531	450
ENSMUSG00000001082	Mfsd10	-1.001	8.5e-07	2.7e-05	410	323	345	179	201	158	390	329	282	170	228	186
ENSMUSG00000022523	Fgf12	4.229	4.7e-09	2.6e-07	1	3	2	50	20	58	1	3	2	47	23	68
ENSMUSG00000087327	Gm15884	-1.059	8.3e-06	0.00018	290	342	348	126	134	209	276	348	284	119	152	246
ENSMUSG00000031065	Cdk16	-1.097	2.5e-08	1.2e-06	1128	816	853	500	328	479	1073	831	697	474	372	564
ENSMUSG00000030350	Prmt8	7.117	2.1e-07	7.8e-06	0	0	0	10	20	21	0	0	0	9	23	25
ENSMUSG00000030714	Ccdc101	-1.038	8.5e-06	0.00018	304	314	327	179	107	174	289	320	267	170	122	204
ENSMUSG00000104339	C130089K02Rik	1.303	9.7e-06	0.0002	88	95	52	210	218	155	84	97	42	199	247	183
ENSMUSG00000033707	Lrrc24	1.343	1.8e-07	6.9e-06	61	65	72	165	180	157	58	66	59	156	204	185
ENSMUSG00000097312	Gm26870	2.086	1.2e-08	6.2e-07	69	45	142	260	480	348	66	46	117	246	544	410
ENSMUSG00000035278	Plekhj1	-1.002	5.5e-05	0.0009	688	639	648	422	184	381	655	651	529	400	209	448
ENSMUSG00000107969	RP24-314D22.2	-2.497	0.00011	0.0015	42	67	53	0	15	13	40	68	43	0	17	15
ENSMUSG00000027611	Procr	1.461	3.1e-06	7.8e-05	35	56	56	111	141	152	33	57	46	105	160	179
ENSMUSG00000022211	Lrrc16b	2.387	8.8e-07	2.8e-05	4	17	11	45	61	63	4	17	9	43	69	74
ENSMUSG00000024217	Snrpc	-1.513	4.1e-13	4.6e-11	946	632	600	288	229	246	900	644	490	273	260	290
ENSMUSG00000060591	Ifitm2	-1.334	2.1e-07	7.7e-06	2854	1966	2452	1238	525	1121	2716	2002	2003	1173	596	1319
ENSMUSG00000028430	Nol6	-1.045	0.00012	0.0017	295	300	254	180	84	147	281	305	207	171	96	173
ENSMUSG00000019990	Pde7b	-1.728	0.0018	0.016	89	104	93	60	18	8	85	106	76	57	21	10
ENSMUSG00000049907	Rasl11b	1.134	1.2e-06	3.6e-05	95	114	116	214	228	270	90	116	95	203	259	317
ENSMUSG00000066720	Cldn9	-1.614	3.3e-07	1.2e-05	353	256	218	122	96	52	336	261	178	116	109	62
ENSMUSG00000036764	Dnajc12	-1.412	3.8e-07	1.3e-05	148	153	143	43	62	61	141	156	117	41	70	72
ENSMUSG00000064368	mt-Nd6	-1.027	3.8e-07	1.3e-05	17619	15783	12993	10009	5593	7172	16764	16070	10614	9482	6339	8440
ENSMUSG00000035164	Zc3h12c	-1.349	2.2e-05	0.00042	120	182	151	81	50	46	114	185	123	77	57	55
ENSMUSG00000070003	Ssbp4	-1.172	1.1e-08	5.6e-07	609	429	423	192	235	221	580	437	345	182	266	260
ENSMUSG00000038976	Ppp1r9b	-1.17	3.8e-06	9.3e-05	239	197	207	118	90	78	227	201	169	112	102	92
ENSMUSG00000054008	Ndst1	-1.197	1.1e-06	3.3e-05	226	214	184	84	106	81	215	218	150	80	120	96
ENSMUSG00000091636	A330050F15Rik	7.443	1e-16	1.7e-14	1	0	0	36	70	146	1	0	0	34	79	171
ENSMUSG00000040158	Tax1bp3	-2.929	2.3e-16	3.9e-14	310	147	180	24	29	30	295	150	147	23	33	35
ENSMUSG00000015222	Map2	2.222	1.6e-05	0.00032	5	27	36	139	104	75	5	27	30	132	118	89
ENSMUSG00000050052	Tdrp	2.148	9.2e-06	0.0002	13	6	24	68	69	52	12	6	20	64	78	61
ENSMUSG00000081055	Gm6987	1.389	6.1e-06	0.00014	112	219	346	680	492	601	106	223	284	644	558	707
ENSMUSG00000015120	Ube2i	-1.386	4.7e-09	2.6e-07	572	361	547	242	153	172	544	368	447	229	174	202
ENSMUSG00000024777	Ppp2r5b	-1.335	1.4e-06	4e-05	149	156	158	76	50	58	142	159	129	72	57	68
ENSMUSG00000027438	Napb	1.097	1.3e-09	8.1e-08	438	505	458	1117	1123	759	417	514	374	1058	1273	894
ENSMUSG00000046822	Slc39a3	1.056	2.6e-06	6.7e-05	138	104	139	244	279	269	131	106	114	231	316	316
ENSMUSG00000060279	Ap2a1	-1.683	0.00036	0.0042	638	604	525	373	50	127	607	615	429	354	57	150
ENSMUSG00000015467	Egfl8	1.42	0.00019	0.0025	22	55	71	140	134	124	21	56	59	133	152	146
ENSMUSG00000035283	Adrb1	1.711	8e-06	0.00017	37	16	32	76	98	101	35	16	26	72	111	119
ENSMUSG00000105519	E430021H15Rik	1.869	4.7e-06	0.00011	19	36	13	80	81	89	18	37	10	76	92	105
ENSMUSG00000033423	Eri3	-1.517	3.4e-07	1.2e-05	1224	803	977	536	180	334	1165	818	798	508	205	393
ENSMUSG00000040435	Ppp1r15a	-1.646	1.8e-06	5e-05	487	410	303	214	100	69	463	417	247	203	114	82
ENSMUSG00000040441	Slc26a10	3.275	1.3e-07	5.1e-06	2	5	6	30	35	64	2	5	5	28	40	75
ENSMUSG00000055567	Unc80	2.302	0.00013	0.0019	4	6	24	65	65	37	4	6	20	62	74	44
ENSMUSG00000065208	Gm24616	-3.106	1.1e-06	3.4e-05	37	21	48	4	3	5	35	21	40	4	3	6
ENSMUSG00000090031	4732440D04Rik	-2.125	3.4e-06	8.3e-05	64	75	42	20	10	12	61	76	34	19	11	14
ENSMUSG00000095186	Gm10718	2.166	4.5e-05	0.00076	6	11	27	46	86	70	6	11	23	43	97	82
ENSMUSG00000101555	Gm28731	-3.266	3.3e-07	1.2e-05	46	43	19	2	4	5	44	44	15	2	4	6
ENSMUSG00000103891	Gm37941	3.292	2.4e-06	6.4e-05	0	4	9	30	66	38	0	4	8	28	74	45
ENSMUSG00000032666	1700025G04Rik	1.299	1.2e-06	3.5e-05	64	62	68	145	146	187	61	63	56	137	166	220
ENSMUSG00000036523	Greb1	1.172	3.5e-06	8.7e-05	134	261	156	470	424	349	127	266	127	445	481	411
ENSMUSG00000048015	Neurod4	4.654	4.5e-07	1.6e-05	0	1	1	32	17	15	0	1	1	30	19	18
ENSMUSG00000052188	Gm14964	5.257	4.1e-07	1.4e-05	0	0	1	16	14	26	0	0	1	15	16	30
ENSMUSG00000086536	Gm12264	-1.385	0.00028	0.0035	317	321	359	214	47	121	302	327	293	203	54	142
ENSMUSG00000105485	Gm42447	2.555	6.6e-08	2.9e-06	6	10	7	45	42	53	6	10	6	43	48	62
ENSMUSG00000029352	Crybb3	1.256	2.8e-06	7e-05	71	69	76	151	209	155	68	70	62	143	237	183
ENSMUSG00000032363	Adamts7	-1.315	3.4e-06	8.3e-05	196	139	134	62	59	67	187	142	109	59	67	79
ENSMUSG00000048988	Elfn1	2.278	1.2e-05	0.00025	14	3	17	48	61	54	13	3	14	45	69	63
ENSMUSG00000087526	Gm15738	-3.396	1.6e-06	4.5e-05	41	26	22	0	3	5	39	26	18	0	3	6
ENSMUSG00000028256	Odf2l	-1.075	8.9e-07	2.8e-05	241	267	263	119	109	137	229	272	215	113	124	161
ENSMUSG00000031112	Stk26	-4.718	3.1e-06	7.8e-05	27	17	14	0	2	0	26	17	11	0	2	0
ENSMUSG00000049580	Tsku	2.064	9e-07	2.8e-05	18	21	10	86	55	64	17	21	8	82	63	75
ENSMUSG00000070692	Rps12-ps10	1.571	9.1e-07	2.8e-05	31	42	36	91	125	107	29	43	29	86	141	126
ENSMUSG00000064337	mt-Rnr1	-2.345	1.6e-22	4.1e-20	46084	89495	99913	15856	16771	13716	43848	91124	81625	15021	19006	16142
ENSMUSG00000088359	Gm24009	2.465	1.1e-05	0.00023	3	14	9	29	56	59	3	14	7	27	63	69
ENSMUSG00000046186	Cd109	-1.236	1.2e-06	3.6e-05	292	417	295	98	168	160	278	425	241	93	190	188
ENSMUSG00000086354	Gm13938	-1.776	1.5e-07	5.8e-06	75	89	87	26	23	24	71	91	71	25	26	28
ENSMUSG00000104571	Gm43010	-4.324	2.5e-06	6.6e-05	23	28	11	0	3	0	22	28	9	0	3	0
ENSMUSG00000002320	Tm9sf1	-1.379	1.7e-06	4.6e-05	135	137	131	63	42	49	128	139	107	60	48	58
ENSMUSG00000026779	Mastl	-1.014	1.2e-06	3.5e-05	262	293	292	153	131	136	249	298	239	145	148	160
ENSMUSG00000030727	Rabep2	-1.09	2e-08	9.6e-07	1164	1230	806	601	437	468	1108	1252	658	569	495	551
ENSMUSG00000037747	Phyhipl	1.554	0.00015	0.002	45	15	44	85	116	104	43	15	36	80	131	122
ENSMUSG00000097418	Mir155hg	-4.701	5.1e-10	3.6e-08	26	89	59	0	5	1	25	91	48	0	6	1
ENSMUSG00000101188	Eif4a-ps4	-2.345	1.3e-05	0.00026	37	56	57	17	3	9	35	57	47	16	4	11
ENSMUSG00000031167	Rbm3	-1.024	1.8e-06	5e-05	1345	1010	1103	656	371	673	1280	1028	901	622	421	792
ENSMUSG00000038884	A230050P20Rik	1.437	2e-05	0.00038	32	62	44	100	124	150	30	63	36	95	140	176
ENSMUSG00000040729	Cep126	-2.727	6.5e-07	2.1e-05	33	49	36	4	9	4	31	50	29	4	10	5
ENSMUSG00000072980	Oip5	-1.144	9.9e-06	0.00021	220	232	153	87	94	93	209	236	125	82	106	110
ENSMUSG00000086994	Gm13402	-2.845	5.4e-07	1.8e-05	42	30	37	6	6	2	40	31	30	6	7	3
ENSMUSG00000097136	Gm26772	1.698	1.4e-06	4e-05	25	27	30	97	106	68	24	28	25	92	120	80
ENSMUSG00000103624	Gm3081	-4.34	2.2e-06	5.9e-05	28	10	24	0	2	1	27	10	20	0	2	1
ENSMUSG00000043518	Rai2	1.132	4.1e-06	9.8e-05	169	126	108	360	261	264	161	128	88	341	296	311
ENSMUSG00000049950	Rpp38	-1.015	1.4e-07	5.7e-06	562	446	669	298	271	261	535	454	547	282	307	307
ENSMUSG00000025739	Gng13	1.298	2.5e-05	0.00046	42	58	78	130	138	168	40	59	64	123	157	198
ENSMUSG00000098178	Gm42418	-1.945	7.2e-15	9.7e-13	19049	14351	9564	4980	2841	3339	18125	14612	7813	4718	3220	3930
ENSMUSG00000021573	Tppp	1.796	7.3e-05	0.0011	19	12	36	96	79	57	18	12	30	91	90	67
ENSMUSG00000105458	mmu-mir-3074-2	-2.375	8.1e-05	0.0012	36	60	41	18	5	3	34	61	33	17	6	4
ENSMUSG00000021469	Msx2	-2.281	6.7e-06	0.00015	65	48	46	3	16	13	62	49	37	3	18	15
ENSMUSG00000036913	Trim67	3.936	2.2e-05	0.00041	0	0	5	36	25	13	0	0	4	34	28	16
ENSMUSG00000096847	Tmem151b	1.86	2.5e-05	0.00045	19	31	11	52	93	82	18	32	9	49	105	96
ENSMUSG00000108170	RP23-92M3.4	-2.629	4.9e-06	0.00011	31	38	57	5	3	11	29	39	47	5	4	13
ENSMUSG00000091192	Sardhos	2.331	2.4e-07	8.9e-06	8	12	10	58	41	54	8	12	8	55	47	63
ENSMUSG00000031433	Rbm41	-2.781	7.3e-10	4.9e-08	52	76	115	12	11	12	49	77	95	11	13	14
ENSMUSG00000002108	Nr1h3	2.463	5.5e-05	0.0009	2	5	16	43	51	36	2	5	14	41	58	43
ENSMUSG00000020723	Cacng4	1.367	1.8e-05	0.00035	81	80	42	140	164	220	77	81	34	133	186	258
ENSMUSG00000097028	Ptgs2os	-2.084	1.4e-06	4.1e-05	90	121	59	29	12	22	86	123	48	28	14	26
ENSMUSG00000103945	Gm38228	-2.514	4.2e-05	0.00072	38	47	40	10	11	1	36	48	33	10	12	1
ENSMUSG00000026333	Gin1	-1.12	5.1e-06	0.00012	177	221	226	107	83	98	168	225	185	101	94	115
ENSMUSG00000102813	Gm37795	-2.734	9.6e-06	0.0002	50	38	23	4	3	10	48	39	18	4	3	11
ENSMUSG00000086877	A230072C01Rik	-1.102	1.2e-05	0.00025	270	189	201	91	115	101	257	192	164	86	130	119
ENSMUSG00000047786	Lix1	1.229	1.2e-06	3.6e-05	188	159	103	435	315	309	179	162	84	412	357	364
ENSMUSG00000051219	3100002H09Rik	6.889	9.2e-07	2.8e-05	0	0	0	17	17	10	0	0	0	16	19	12
ENSMUSG00000108321	RP23-362F15.1	-4.007	1.2e-06	3.5e-05	18	28	19	0	1	3	17	28	15	0	1	3
ENSMUSG00000055994	Nod2	2.625	4.4e-09	2.5e-07	16	12	12	116	80	51	15	12	10	110	91	61
ENSMUSG00000037843	Vstm2l	6.873	7.3e-07	2.3e-05	0	0	0	14	18	12	0	0	0	13	20	14
ENSMUSG00000049641	Vgll2	1.033	1.8e-05	0.00035	341	247	162	535	561	443	325	252	132	507	636	522
ENSMUSG00000072898	Gm10434	-1.285	0.00016	0.0021	178	149	148	35	65	94	169	152	121	33	74	110
ENSMUSG00000073423	Zfp414	-1.128	2e-05	0.00037	232	163	197	109	83	80	221	166	161	103	94	94
ENSMUSG00000098088	Gm26916	-2.699	8.6e-07	2.7e-05	40	34	37	8	3	5	38	35	30	8	4	6
ENSMUSG00000108109	RP23-177J21.15	-6.893	6.9e-06	0.00015	21	18	5	0	0	0	20	18	4	0	0	0
ENSMUSG00000054293	A630033H20Rik	-1.786	4.1e-06	9.8e-05	101	66	66	16	23	28	96	67	54	15	26	33
ENSMUSG00000033965	Slc16a2	1.248	1.6e-06	4.6e-05	72	63	61	148	167	153	69	64	50	140	189	180
ENSMUSG00000057924	Gm10033	-3.138	1.1e-05	0.00023	25	30	31	6	4	0	24	31	25	6	4	0
ENSMUSG00000069184	Zfp72	-7.218	1.3e-06	3.8e-05	27	6	22	0	0	0	26	6	18	0	0	0
ENSMUSG00000096996	Gm26792	-2.394	8.7e-06	0.00019	58	38	41	6	15	4	55	39	33	6	17	5
ENSMUSG00000078920	Ifi47	-2.012	8.1e-06	0.00018	55	60	67	21	7	17	52	61	55	20	8	20
ENSMUSG00000020211	Sf3a2	-1.224	0.00011	0.0016	190	139	131	86	45	66	181	142	107	82	51	78
ENSMUSG00000048732	Klhl11	-1.944	3.4e-07	1.2e-05	70	57	71	14	18	20	67	58	58	13	20	23
ENSMUSG00000050931	Sgms2	-1.153	6.1e-05	0.00099	230	162	212	61	115	94	219	165	173	58	130	111
ENSMUSG00000090394	4930523C07Rik	1.634	7.2e-07	2.3e-05	30	27	28	79	97	88	29	27	23	75	110	104
ENSMUSG00000045498	Pcdhb3	2.094	8.2e-05	0.0013	3	23	15	58	68	48	3	23	12	55	77	57
ENSMUSG00000050761	Gp1bb	1.68	1e-05	0.00021	19	25	35	96	94	63	18	25	29	91	106	74
ENSMUSG00000030400	Ercc2	1.115	8.7e-06	0.00019	79	97	95	174	227	187	75	99	78	165	257	220
ENSMUSG00000022562	Oplah	-1.425	9.1e-07	2.8e-05	412	287	265	166	77	116	392	292	216	157	88	137
ENSMUSG00000075316	Scn9a	-1.022	2e-06	5.3e-05	593	828	810	391	260	448	564	843	662	370	295	527
ENSMUSG00000071266	Zfp946	-1.518	0.00015	0.0021	83	99	132	44	48	17	79	101	108	42	54	21
ENSMUSG00000087114	Gm16099	3.455	4.2e-06	9.9e-05	2	0	5	25	20	31	2	0	4	24	23	36
ENSMUSG00000090942	F830016B08Rik	-1.885	2.6e-06	6.7e-05	83	65	53	17	14	23	79	66	43	16	16	27
ENSMUSG00000063145	Bbs5	-1.005	8.3e-05	0.0013	221	268	216	151	108	92	210	273	176	143	123	109
ENSMUSG00000099708	Gm29361	-1.847	0.00034	0.004	49	79	68	32	7	15	47	80	56	31	8	18
ENSMUSG00000025450	Gm9752	-2.703	3.2e-06	8.1e-05	25	33	51	5	3	8	24	34	42	5	4	9
ENSMUSG00000037686	Aspg	2.361	3e-06	7.5e-05	8	13	5	36	58	43	8	13	4	34	66	51
ENSMUSG00000043801	Oaz1-ps	-1.877	8.8e-06	0.00019	122	82	67	29	13	31	116	83	54	28	15	36
ENSMUSG00000020019	Ntn4	-1.031	3.1e-05	0.00055	244	241	273	88	148	134	232	245	223	83	167	158
ENSMUSG00000024793	Tnfrsf25	1.115	9.7e-06	0.0002	97	116	103	287	198	200	92	118	84	272	224	236
ENSMUSG00000036036	Zfp57	-1.624	0.003	0.024	90	88	92	23	7	58	86	90	75	22	8	67
ENSMUSG00000024268	Celf4	1.17	3.7e-09	2.2e-07	429	575	453	814	1335	1128	408	585	370	771	1513	1327
ENSMUSG00000056234	Ncoa4	-1.548	1.3e-05	0.00027	101	95	98	21	31	48	96	97	80	20	35	56
ENSMUSG00000100215	Gm8292	1.248	1.2e-10	9.6e-09	867	1030	913	1549	2549	2577	825	1049	746	1467	2888	3033
ENSMUSG00000029636	Wasf3	1.067	2.7e-05	0.00049	108	105	123	251	175	279	103	107	101	238	199	328
ENSMUSG00000001128	Cfp	1.217	8.4e-06	0.00018	53	74	73	168	143	154	50	75	60	159	162	181
ENSMUSG00000054383	Pnma1	2.165	2.2e-06	5.9e-05	9	20	21	101	67	51	8	20	17	96	76	61
ENSMUSG00000039474	Wfs1	1.076	4.3e-09	2.4e-07	673	900	750	1992	1610	1297	640	916	613	1887	1825	1527
ENSMUSG00000066235	Pomgnt2	1.137	0.00014	0.0019	52	85	101	178	195	150	49	87	83	169	221	177
ENSMUSG00000072770	Acrbp	1.428	1.1e-05	0.00023	35	44	45	137	111	86	33	45	37	130	126	102
ENSMUSG00000083992	Gm11478	1.09	2.8e-07	1e-05	241	343	317	472	741	703	229	349	259	447	840	827
ENSMUSG00000021131	Erh	-1.174	1.5e-05	0.0003	673	721	902	461	179	377	640	734	737	437	203	444
ENSMUSG00000081451	Gm12734	-3.196	9.3e-06	0.0002	25	31	22	3	0	5	24	32	18	3	0	6
ENSMUSG00000032564	Cpne4	1.727	3.6e-05	0.00062	21	14	30	55	89	70	20	14	25	52	101	83
ENSMUSG00000021136	Smoc1	1.475	4.4e-05	0.00074	28	33	45	75	130	92	27	34	37	71	147	108
ENSMUSG00000027820	Mme	-1.114	2.4e-05	0.00045	189	207	165	69	84	106	180	211	135	65	95	125
ENSMUSG00000030905	Crym	1.494	5.9e-08	2.6e-06	103	103	71	344	217	223	98	105	58	326	246	263
ENSMUSG00000027326	Casc5	-1.585	5e-10	3.6e-08	372	304	528	101	146	153	354	310	432	96	165	180
ENSMUSG00000101144	Gm29054	-1.273	0.00028	0.0035	106	132	153	80	36	46	101	134	125	76	41	54
ENSMUSG00000024121	Atp6v0c	-3.436	1.8e-07	6.9e-06	154	66	75	17	11	0	147	67	61	16	12	0
ENSMUSG00000028175	Depdc1a	-1.805	1.2e-06	3.6e-05	68	75	58	20	19	18	65	76	47	19	22	21
ENSMUSG00000022987	Zfp641	2.872	2.1e-05	0.00039	2	2	8	24	41	26	2	2	7	23	46	31
ENSMUSG00000097390	Gm26785	1.655	1.1e-05	0.00022	34	26	19	85	98	63	32	26	15	81	111	74
ENSMUSG00000055485	Soga1	-1.08	4e-06	9.6e-05	213	184	206	90	99	96	203	187	168	85	112	113
ENSMUSG00000020052	Ascl1	3.169	4.2e-06	0.0001	1	3	5	35	19	27	1	3	4	33	22	32
ENSMUSG00000069793	Slfn9	-1.749	0.00021	0.0027	98	60	105	38	9	31	93	61	86	36	11	36
ENSMUSG00000019146	Cacng2	5.016	3.9e-06	9.3e-05	0	0	1	11	15	21	0	0	1	10	17	25
ENSMUSG00000045903	Npas4	2.572	3.2e-05	0.00057	4	2	12	39	38	30	4	2	10	37	43	36
ENSMUSG00000021303	Gng4	2.876	7.8e-05	0.0012	7	0	5	25	43	23	7	0	4	24	48	27
ENSMUSG00000076454	Mir762	-3.206	4.9e-05	0.00082	30	25	19	6	1	1	29	25	15	6	1	1
ENSMUSG00000027944	Hax1	-1.02	1.7e-06	4.7e-05	605	464	688	362	232	273	576	472	562	343	263	321
ENSMUSG00000026839	Upp2	1.374	1.3e-05	0.00027	31	44	51	110	113	104	29	45	42	104	128	122
ENSMUSG00000085941	Gm11201	4.389	2e-06	5.5e-05	0	1	1	18	21	13	0	1	1	17	24	16
ENSMUSG00000063130	Calml3	2.171	3.4e-05	0.0006	3	14	14	45	58	40	3	14	12	43	65	47
ENSMUSG00000024251	Thada	-1.15	4.6e-06	0.00011	156	171	165	71	69	82	148	174	135	67	78	96
ENSMUSG00000043648	Pld6	2.217	9.6e-07	3e-05	11	16	23	107	70	52	10	16	19	102	79	62
ENSMUSG00000071573	Rnls	-1.929	8.2e-06	0.00018	87	47	54	12	18	20	83	48	44	11	20	23
ENSMUSG00000001166	Oas1c	3.541	2.3e-05	0.00042	0	2	4	31	13	24	0	2	3	29	15	28
ENSMUSG00000002384	Bmp8b	-1.379	0.00014	0.002	103	114	115	42	23	62	98	116	94	40	27	72
ENSMUSG00000049122	Frmd3	1.665	8.3e-05	0.0013	36	14	21	64	94	65	34	14	17	61	106	77
ENSMUSG00000060427	Zfp868	-1.156	0.00033	0.004	154	174	203	43	104	89	146	177	166	41	118	105
ENSMUSG00000070368	Prok1	1.379	1.4e-05	0.00027	33	54	39	102	119	107	31	55	32	97	135	126
ENSMUSG00000017724	Etv4	-1.048	0.00016	0.0021	286	204	275	135	80	155	272	208	225	128	91	182
ENSMUSG00000024140	Epas1	1.698	0.00027	0.0034	33	10	35	90	57	105	31	10	29	85	65	123
ENSMUSG00000026235	Epha4	-1.133	1.9e-05	0.00036	139	177	171	84	73	64	132	180	140	80	83	76
ENSMUSG00000044469	Tnfaip8l1	1.236	4.8e-06	0.00011	60	60	55	149	139	125	57	61	45	141	158	147
ENSMUSG00000063142	Kcnma1	1.961	4.3e-06	0.0001	13	14	16	43	69	53	12	14	13	41	78	62
ENSMUSG00000087024	B230119M05Rik	-5.061	3.4e-05	0.0006	13	8	23	1	0	0	12	8	19	1	0	0
ENSMUSG00000097554	Gm26825	1.037	2.7e-06	7e-05	381	736	555	941	1130	1357	362	749	453	891	1281	1597
ENSMUSG00000097604	Gm17322	-3.256	6.7e-05	0.0011	18	36	17	0	2	5	17	37	14	0	2	6
ENSMUSG00000027859	Ngf	-2.501	9.1e-05	0.0014	49	33	26	3	2	13	47	34	21	3	3	15
ENSMUSG00000029167	Ppargc1a	1.952	2e-07	7.6e-06	27	41	27	126	167	79	26	42	22	119	189	94
ENSMUSG00000061371	Zfp873	-1.661	1.9e-05	0.00036	69	77	75	28	13	28	66	78	61	27	15	33
ENSMUSG00000074874	Ctla2b	-2.429	8.8e-06	0.00019	51	47	90	14	18	3	48	48	74	13	20	4
ENSMUSG00000083757	Rps15a-ps4	2.184	2.7e-06	7e-05	12	11	8	35	52	50	11	11	6	33	59	59
ENSMUSG00000085612	Gm15868	-2.645	2.1e-06	5.6e-05	29	34	35	4	3	8	28	35	29	4	4	9
ENSMUSG00000094824	Gm23803	2.371	4.6e-06	0.00011	5	12	6	50	35	38	5	12	5	47	40	45
ENSMUSG00000028785	Hpca	3.381	7.3e-05	0.0011	1	0	7	20	21	45	1	0	6	19	24	52
ENSMUSG00000037362	Nov	-1.287	3.9e-05	0.00067	159	101	102	48	51	49	151	103	83	45	58	58
ENSMUSG00000059995	Atxn7l3	-1.017	1.2e-05	0.00025	227	193	204	111	93	105	216	197	167	105	106	123
ENSMUSG00000074867	Zfp808	-2.765	7.6e-05	0.0012	20	34	39	1	3	10	19	35	32	1	3	11
ENSMUSG00000025877	Hk3	2.502	3e-06	7.5e-05	4	6	8	31	40	36	4	6	7	29	45	42
ENSMUSG00000087400	Gm15270	-1.787	2.3e-05	0.00042	62	75	44	23	16	13	59	76	36	22	18	16
ENSMUSG00000028042	Zbtb7b	-1.06	5.3e-05	0.00088	211	153	182	101	86	75	201	156	149	96	98	88
ENSMUSG00000031144	Syp	4.651	9.7e-12	9e-10	1	6	3	135	34	81	1	6	2	128	39	95
ENSMUSG00000039546	Ajap1	3.081	3.2e-06	8e-05	2	2	5	26	23	27	2	2	4	25	26	32
ENSMUSG00000077167	Gm24119	-4.027	1.4e-05	0.00028	19	18	15	2	0	1	18	18	12	2	0	1
ENSMUSG00000087380	2210408F21Rik	1.096	1.3e-05	0.00026	69	83	82	167	159	177	66	85	67	158	180	208
ENSMUSG00000091160	Gm17133	-5.524	2.5e-06	6.6e-05	32	8	20	1	0	0	31	8	16	1	0	0
ENSMUSG00000047501	Cldn4	-1.748	5.9e-06	0.00013	90	89	150	47	26	24	86	91	123	45	30	29
ENSMUSG00000056158	Car10	3.942	4.3e-09	2.4e-07	2	5	4	21	66	83	2	5	3	20	75	97
ENSMUSG00000060726	Tmsb15a	1.574	0.00019	0.0026	123	41	34	189	238	163	117	42	27	179	269	192
ENSMUSG00000077563	Snora68	-1.442	2.5e-05	0.00046	92	109	73	31	29	41	88	111	59	29	33	48
ENSMUSG00000084403	Rps15a-ps8	2.011	9e-06	0.00019	18	11	9	40	56	56	17	11	7	38	63	66
ENSMUSG00000026442	Nfasc	1.905	0.00089	0.009	7	6	27	39	58	55	7	6	23	37	66	65
ENSMUSG00000062345	Serpinb2	-2.047	5.3e-15	7.3e-13	702	1460	887	281	180	277	668	1486	724	266	204	326
ENSMUSG00000085737	Gm13442	-6.935	5e-06	0.00012	26	8	11	0	0	0	25	8	9	0	0	0
ENSMUSG00000094530	Gm21399	-1.509	3e-05	0.00053	97	61	101	34	25	32	92	62	83	32	28	38
ENSMUSG00000027220	Syt13	1.028	9.1e-05	0.0014	95	107	77	152	211	207	90	109	63	144	239	243
ENSMUSG00000042724	Map3k9	1.179	3.2e-07	1.2e-05	403	248	244	827	673	530	384	253	199	784	763	624
ENSMUSG00000072653	Zfp783	1.408	4.1e-05	0.00071	28	28	47	92	84	100	27	29	39	87	95	118
ENSMUSG00000102496	Gm36989	-2.834	0.00015	0.002	15	36	34	0	7	4	14	37	28	0	8	5
ENSMUSG00000026527	Rgs7	2.776	8e-05	0.0012	0	9	11	22	55	60	0	9	9	21	62	70
ENSMUSG00000102224	4930447F24Rik	-6.494	8.5e-05	0.0013	4	17	12	0	0	0	4	17	10	0	0	0
ENSMUSG00000107944	RP23-337M7.12	-3.525	3.6e-07	1.3e-05	69	21	54	5	6	1	66	21	44	5	7	1
ENSMUSG00000004655	Aqp1	-1.277	2.1e-05	0.0004	127	105	126	37	55	55	121	107	103	35	62	65
ENSMUSG00000019966	Kitl	-1.481	0.00081	0.0082	71	104	98	12	45	40	67	106	80	11	51	47
ENSMUSG00000020889	Nr1d1	-1.395	4.6e-07	1.6e-05	314	206	182	99	84	84	299	210	148	94	95	99
ENSMUSG00000037996	Slc24a2	2.503	0.00025	0.0032	1	4	12	23	44	29	1	4	10	22	50	34
ENSMUSG00000058625	Gm17383	-1.572	0.00013	0.0018	86	89	47	33	20	22	82	91	38	31	23	26
ENSMUSG00000105011	Gm43210	1.075	1.2e-06	3.5e-05	180	193	157	474	329	317	171	197	128	449	373	373
ENSMUSG00000020658	Efr3b	1.274	7.5e-06	0.00017	119	82	83	268	261	160	113	84	68	254	296	189
ENSMUSG00000064030	Pym1	-2.31	1.8e-06	4.9e-05	82	60	34	13	11	11	78	61	27	12	13	13
ENSMUSG00000085838	Chn1os1	-1.935	0.001	0.01	44	42	62	26	4	8	42	43	51	25	5	10
ENSMUSG00000020493	Prr11	-1.037	7.5e-05	0.0012	162	191	224	81	85	114	154	194	183	77	96	134
ENSMUSG00000028978	Nos3	1.303	5.4e-05	0.00088	39	39	52	126	83	114	37	40	43	119	94	134
ENSMUSG00000035566	Pcdh17	1.13	6.3e-05	0.001	84	101	76	136	231	205	80	103	62	129	262	241
ENSMUSG00000046574	Prr12	-1.156	1.6e-05	0.00032	130	153	131	62	57	66	124	156	107	59	65	78
ENSMUSG00000097081	Gm10425	-1.191	0.0001	0.0015	136	121	142	62	39	73	129	123	116	59	45	85
ENSMUSG00000097147	Gm26780	-3.175	6.4e-05	0.001	23	29	16	0	2	5	22	29	13	0	2	6
ENSMUSG00000000058	Cav2	-1.489	1.7e-05	0.00032	89	78	80	32	21	35	85	79	65	30	24	41
ENSMUSG00000018909	Arrb1	1.967	8.9e-05	0.0013	25	8	12	80	40	58	24	8	10	76	46	68
ENSMUSG00000026029	Casp8	-1.168	0.00012	0.0017	149	141	135	40	72	76	142	144	110	38	82	89
ENSMUSG00000034435	Tmem30b	1.073	4.9e-05	0.00082	93	76	66	163	149	185	89	77	54	154	169	217
ENSMUSG00000090327	Gm17111	-1.387	0.00089	0.009	100	88	75	54	17	30	95	90	61	51	20	35
ENSMUSG00000024176	Sox8	1.07	4.6e-05	0.00078	78	83	77	184	134	184	74	85	63	174	152	216
ENSMUSG00000035983	Gm7008	-2.156	2.6e-05	0.00047	58	28	42	7	12	8	55	29	34	7	14	10
ENSMUSG00000096910	Zfp955b	-2.349	0.00019	0.0025	36	32	35	14	2	5	34	33	29	13	2	6
ENSMUSG00000096926	Gm26823	1.19	0.00017	0.0022	45	78	52	130	161	109	43	79	42	123	182	128
ENSMUSG00000104030	5330406M23Rik	1.206	1.6e-05	0.00032	80	121	128	192	324	242	76	123	105	182	367	285
ENSMUSG00000027221	Chst1	3.508	5.6e-05	0.00091	5	0	1	11	33	34	5	0	1	10	37	40
ENSMUSG00000055240	Zfp101	-1.282	5.8e-05	0.00093	222	335	329	61	157	145	211	341	269	58	178	170
ENSMUSG00000060913	Trim55	-1.457	1.5e-07	5.9e-06	806	533	478	306	136	220	767	543	390	290	155	259
ENSMUSG00000063412	Gm10131	-1.542	0.00073	0.0076	70	62	91	41	11	25	67	63	75	39	13	29
ENSMUSG00000024598	Fbn2	1.8	2.4e-05	0.00044	13	15	21	51	47	70	12	15	17	48	53	82
ENSMUSG00000025785	Exosc7	-1.026	1e-07	4.3e-06	1256	1442	1913	819	593	852	1195	1468	1563	776	672	1002
ENSMUSG00000096201	Gm10715	2.101	0.00019	0.0025	5	10	27	39	83	61	5	10	23	37	94	72
ENSMUSG00000009394	Syn2	1.135	4.5e-05	0.00076	74	70	51	136	136	155	70	71	41	129	154	182
ENSMUSG00000017400	Stac2	-2.123	4.8e-05	0.0008	46	34	51	7	5	17	44	35	42	7	6	20
ENSMUSG00000029477	Morn3	1.514	0.00025	0.0032	46	33	17	110	102	64	44	34	13	104	115	76
ENSMUSG00000033530	Ttc7b	1.008	8e-05	0.0012	113	90	85	230	178	173	108	92	69	218	202	204
ENSMUSG00000035133	Arhgap5	-1.012	0.00012	0.0017	656	634	704	189	491	307	624	646	575	179	556	362
ENSMUSG00000097358	Gm26773	-1.836	0.0018	0.016	61	74	97	47	9	8	58	75	80	45	11	10
ENSMUSG00000030330	Ing4	-2.009	0.0013	0.012	61	43	33	7	23	3	58	44	27	7	26	4
ENSMUSG00000030790	Adm	1.75	9.3e-05	0.0014	39	14	20	109	60	76	37	14	16	103	68	89
ENSMUSG00000061482	Hist1h4d	-2.431	3.3e-05	0.00059	38	24	43	2	10	7	36	24	35	2	11	8
ENSMUSG00000107230	Gm19265	-3.977	1.4e-05	0.00028	11	20	18	0	2	1	10	20	15	0	2	1
ENSMUSG00000108688	RP23-136G1.3	-3.396	0.00017	0.0023	26	18	16	0	0	5	25	18	13	0	0	6
ENSMUSG00000020830	Vmo1	4.819	1.7e-05	0.00033	0	0	1	12	10	19	0	0	1	11	12	22
ENSMUSG00000037847	Nmrk1	-1.052	0.00024	0.003	139	176	158	98	58	72	132	179	129	93	66	85
ENSMUSG00000097665	Gm16853	1.427	2.6e-05	0.00048	47	108	71	138	245	227	45	110	58	131	277	267
ENSMUSG00000027398	Il1b	-1.188	0.0016	0.014	122	111	115	80	28	45	116	113	94	76	32	53
ENSMUSG00000103049	Gm37311	-3.97	3.7e-05	0.00065	11	23	15	0	0	3	10	23	12	0	0	3
ENSMUSG00000024462	Gabbr1	1.067	7.8e-07	2.5e-05	207	223	252	376	436	616	197	227	206	356	494	724
ENSMUSG00000026171	Rnf25	-1.102	8.7e-05	0.0013	142	141	137	82	55	59	135	144	112	78	62	70
ENSMUSG00000032172	Olfm2	-2.842	4.2e-05	0.00072	35	23	17	3	2	5	33	23	14	3	2	6
ENSMUSG00000051678	Pcdhb6	2.951	5.7e-05	0.00092	2	6	1	32	32	12	2	6	1	30	36	15
ENSMUSG00000074166	AW146154	-1.128	4.8e-05	0.0008	140	160	225	74	85	81	133	163	184	70	96	95
ENSMUSG00000070476	Fam217b	1.07	0.00039	0.0045	52	90	83	180	124	168	49	92	68	171	141	198
ENSMUSG00000095530	Snora19	-6.371	0.0001	0.0015	8	16	6	0	0	0	8	16	5	0	0	0
ENSMUSG00000039982	Dtx4	1.082	0.00028	0.0035	69	55	80	154	110	169	66	56	66	146	125	199
ENSMUSG00000074210	E130208F15Rik	-1.07	3.2e-05	0.00057	358	239	250	140	101	162	341	243	204	133	115	190
ENSMUSG00000104277	Gm38299	2.008	6.6e-05	0.001	12	16	8	56	58	28	11	16	6	53	66	33
ENSMUSG00000027971	Ndst4	2.424	0.00021	0.0027	7	1	9	41	34	21	7	1	8	39	39	25
ENSMUSG00000105867	Gm42517	1.668	1.5e-05	0.0003	23	17	18	53	71	62	22	17	15	50	80	73
ENSMUSG00000026459	Myog	-1.235	8.6e-10	5.7e-08	12295	9682	6719	4606	3605	3978	11699	9858	5489	4364	4086	4682
ENSMUSG00000038524	Fchsd1	1.251	4.7e-05	0.00078	59	41	38	117	103	110	56	42	31	111	117	129
ENSMUSG00000085830	Grin1os	6.508	4.9e-05	0.00082	0	0	0	19	9	6	0	0	0	18	10	7
ENSMUSG00000108456	RP24-143K11.2	-1.986	0.0061	0.042	43	40	39	25	2	3	41	41	32	24	3	4
ENSMUSG00000020331	Hcn2	2.946	6.6e-05	0.0011	2	1	6	25	30	15	2	1	5	24	34	18
ENSMUSG00000047905	Gm8566	1.046	6.2e-05	0.001	88	88	66	185	171	148	84	90	54	175	194	174
ENSMUSG00000029072	Tas1r3	1.323	1.8e-05	0.00035	37	44	34	97	88	105	35	45	28	92	100	123
ENSMUSG00000061684	Rpl21-ps8	1.118	0.0002	0.0026	60	70	65	104	180	138	57	71	53	98	204	163
ENSMUSG00000090113	Nhlrc4	1.179	0.00034	0.004	39	40	70	103	109	125	37	41	58	98	124	147
ENSMUSG00000034685	Fam171a2	1.567	0.00011	0.0016	20	33	19	74	90	51	19	34	15	70	102	60
ENSMUSG00000037221	Mospd3	-1.97	6.4e-06	0.00014	129	81	62	31	13	26	123	82	50	29	15	30
ENSMUSG00000086216	Gm13610	-1.231	0.00054	0.0059	174	137	112	92	41	47	166	139	91	87	47	56
ENSMUSG00000105691	Gm42876	1.41	0.00021	0.0027	31	49	21	102	96	71	29	50	17	97	109	84
ENSMUSG00000107932	RP23-288L22.4	2.074	0.00037	0.0043	12	18	2	41	52	39	11	18	1	39	59	46
ENSMUSG00000009614	Sardh	1.504	1.7e-06	4.7e-05	76	52	56	237	137	149	72	53	46	225	155	176
ENSMUSG00000022321	Cdh10	-1.673	4.4e-05	0.00074	63	54	64	19	26	12	60	55	52	18	29	14
ENSMUSG00000107107	AC124496.1	-2.196	3e-05	0.00054	45	37	27	5	7	11	43	38	22	5	8	13
ENSMUSG00000034278	Dnajc17	-1.128	0.00087	0.0088	151	141	113	34	76	75	144	144	92	32	86	88
ENSMUSG00000047036	Zfp445	-2.463	9.3e-05	0.0014	29	23	44	1	8	8	28	23	36	1	9	9
ENSMUSG00000059586	Nsmce2	-1.003	2.9e-08	1.3e-06	1185	1188	1751	673	633	750	1127	1210	1431	638	717	883
ENSMUSG00000084024	Gm15937	6.447	8.7e-05	0.0013	0	0	0	15	13	4	0	0	0	14	15	5
ENSMUSG00000072949	Acot1	1.102	4.5e-05	0.00076	58	58	68	126	136	133	55	59	56	119	154	157
ENSMUSG00000037347	Chst7	1.071	0.001	0.0099	38	79	82	132	131	153	36	80	67	125	149	180
ENSMUSG00000041702	Btbd7	-1.114	0.00011	0.0016	138	137	142	47	65	80	131	140	116	44	74	94
ENSMUSG00000079487	Med12	-2.026	6.7e-05	0.0011	33	61	31	10	10	11	31	62	25	9	11	13
ENSMUSG00000087002	Gm16277	1.344	0.00064	0.0068	35	22	47	66	82	115	33	22	39	62	93	135
ENSMUSG00000090964	Gm17206	-2.144	1.3e-05	0.00027	40	35	37	11	7	8	38	36	30	10	8	9
ENSMUSG00000108322	RP23-455C13.7	1.641	4.7e-14	5.8e-12	1072	1347	1043	4975	3228	2600	1020	1371	852	4713	3658	3060
ENSMUSG00000108634	RP24-402O2.2	1.996	3.7e-05	0.00063	7	15	10	34	41	55	7	15	8	32	46	64
ENSMUSG00000033799	Fam208b	-1.011	1.4e-06	4.1e-05	495	813	662	315	277	386	471	828	541	298	314	454
ENSMUSG00000038068	Rnf144b	1.555	6.9e-09	3.7e-07	136	161	107	520	406	263	129	164	87	493	460	310
ENSMUSG00000071648	Rom1	1.471	6.1e-06	0.00014	52	80	95	141	277	210	49	81	78	133	313	247
ENSMUSG00000086341	Gm15932	-1.464	0.00013	0.0019	86	59	83	33	17	32	82	60	68	31	20	38
ENSMUSG00000087436	Gm16156	-1.521	0.00033	0.004	75	83	48	22	15	34	71	84	39	21	17	40
ENSMUSG00000046733	Gprc5a	-1.257	0.00025	0.0031	189	232	288	153	53	91	180	236	236	145	61	107
ENSMUSG00000075033	Nxpe3	1.092	0.00032	0.0038	49	63	70	99	152	136	47	64	57	94	172	160
ENSMUSG00000078787	Cyp2t4	1.606	2.6e-05	0.00047	15	24	23	57	64	67	14	24	19	54	72	79
ENSMUSG00000094411	Snord16a	-3.891	2.5e-05	0.00046	19	11	16	0	1	2	18	11	13	0	1	2
ENSMUSG00000040415	Dtx3	-1.083	5.1e-05	0.00084	387	275	254	192	105	136	368	280	207	182	119	160
ENSMUSG00000039824	Myl6b	1.052	5.1e-05	0.00084	74	77	64	146	161	138	70	78	52	138	182	163
ENSMUSG00000052724	Gm9888	-3.375	4.3e-09	2.4e-07	95	47	34	6	5	5	91	48	27	6	6	6
ENSMUSG00000003279	Dlgap1	1.385	0.0001	0.0015	27	29	34	61	97	79	26	30	28	58	110	93
ENSMUSG00000056553	Ptprn2	2.551	0.00028	0.0034	3	2	8	16	37	26	3	2	7	15	42	31
ENSMUSG00000103435	Gm36992	-3.387	0.00014	0.0019	13	24	16	2	3	0	12	24	13	2	3	0
ENSMUSG00000049891	Gm7984	-3.024	2.6e-05	0.00048	26	18	18	2	2	3	25	18	15	2	2	4
ENSMUSG00000082633	Gm15779	1.624	8.8e-05	0.0013	18	16	24	55	76	47	17	16	20	52	86	56
ENSMUSG00000059824	Dbp	1.113	2.3e-05	0.00043	98	104	96	281	184	180	93	106	78	266	209	212
ENSMUSG00000105072	AC122428.1	-4.667	8.3e-09	4.4e-07	73	25	26	1	0	4	70	26	21	1	0	4
ENSMUSG00000097867	Lppos	1.211	4.1e-05	0.0007	46	44	45	100	116	98	44	45	37	95	131	116
ENSMUSG00000083897	Gm14843	2.35	8.9e-05	0.0013	5	9	6	18	49	38	5	9	5	17	55	45
ENSMUSG00000086718	Gm16069	-1.414	0.00019	0.0025	269	198	158	124	38	72	256	202	129	118	44	85
ENSMUSG00000028137	Celf3	2.476	1.9e-05	0.00036	6	4	5	29	29	28	6	4	4	27	33	33
ENSMUSG00000029725	Ppp1r35	-1.147	1.1e-05	0.00023	374	248	231	154	105	127	356	253	188	146	119	149
ENSMUSG00000038910	Plcl2	1.005	0.00029	0.0036	69	74	94	190	154	131	66	75	77	180	175	155
ENSMUSG00000107320	Gm42549	-1.95	0.0018	0.016	39	35	46	22	3	6	37	36	38	21	4	7
ENSMUSG00000057378	Ryr3	1.498	9.4e-05	0.0014	25	39	55	143	119	74	24	40	45	136	135	88
ENSMUSG00000001910	Nacc1	-1.241	8.1e-05	0.0012	120	81	106	37	46	47	114	83	87	35	52	55
ENSMUSG00000087396	4933407K13Rik	-1.486	0.00011	0.0016	73	62	85	17	36	25	69	63	70	16	41	29
ENSMUSG00000021200	Asb2	1.11	2e-06	5.5e-05	207	256	173	529	523	324	197	261	141	501	593	382
ENSMUSG00000107917	RP23-178I17.4	2.909	0.0003	0.0036	0	4	5	13	35	20	0	4	4	12	39	24
ENSMUSG00000038583	Pln	-3.669	1.1e-07	4.5e-06	22	78	43	2	2	7	21	79	35	2	2	8
ENSMUSG00000079108	Srp54b	-1.278	0.00027	0.0034	88	86	106	44	24	48	84	88	87	42	27	56
ENSMUSG00000086742	Gm16201	1.436	0.00018	0.0024	24	33	25	77	52	95	23	34	20	73	59	111
ENSMUSG00000037966	Ninj1	-1.045	1.6e-06	4.4e-05	818	518	573	377	248	301	778	527	468	357	281	354
ENSMUSG00000026885	Ttll11	1.233	0.0001	0.0015	32	52	43	104	91	103	30	53	35	99	103	121
ENSMUSG00000085335	Gm13684	-1.987	8.5e-05	0.0013	40	35	51	5	10	16	38	36	42	5	11	19
ENSMUSG00000050357	Rltpr	2.016	1.9e-05	0.00037	10	11	8	34	42	42	10	11	6	32	48	49
ENSMUSG00000062743	Zfp677	-1.589	8.1e-05	0.0012	89	51	104	23	36	22	85	52	85	22	40	26
ENSMUSG00000096755	Gm20746	-1.83	0.00044	0.005	53	29	61	17	6	17	50	30	50	16	7	20
ENSMUSG00000003208	Ccdc94	-2.088	2.8e-05	0.0005	101	44	64	24	8	17	96	45	52	23	9	20
ENSMUSG00000026959	Grin1	2.739	0.0022	0.018	0	1	11	41	16	30	0	1	10	39	18	35
ENSMUSG00000024261	Syt4	3.607	0.00016	0.0021	0	0	7	11	34	44	0	0	6	10	38	51
ENSMUSG00000028718	Stil	-1.083	0.0012	0.011	118	138	154	52	45	97	112	141	126	49	51	113
ENSMUSG00000039377	Hlx	-1.041	0.00016	0.0022	153	144	124	60	63	82	146	147	101	57	71	96
ENSMUSG00000025154	Arhgap19	-1.274	0.00015	0.002	148	142	80	42	51	60	141	145	65	40	58	70
ENSMUSG00000025077	Dclre1a	-1.568	8.8e-05	0.0013	62	85	119	29	20	41	59	87	98	27	23	48
ENSMUSG00000027750	Postn	-1.211	0.00041	0.0047	103	112	67	46	42	33	98	114	54	44	48	39
ENSMUSG00000097080	1700086O06Rik	-1.198	0.00014	0.002	120	94	91	46	35	51	114	96	74	44	40	60
ENSMUSG00000090387	Gm17056	-2.358	0.00054	0.0059	29	35	21	5	1	11	28	36	17	5	1	12
ENSMUSG00000020627	Klhl29	1.659	0.00011	0.0016	19	11	21	53	44	62	18	11	17	50	50	73
ENSMUSG00000062151	Unc13c	1.512	1.3e-05	0.00027	43	63	36	185	102	120	41	64	29	175	116	141
ENSMUSG00000037936	Scarb1	-1.19	0.00012	0.0017	175	95	138	61	60	58	167	97	113	58	68	68
ENSMUSG00000044150	A830080D01Rik	-1.263	7.5e-05	0.0012	247	285	384	65	143	173	235	290	314	61	162	203
ENSMUSG00000056174	Col8a2	1.504	9.4e-05	0.0014	27	71	65	193	100	169	26	72	53	183	114	199
ENSMUSG00000103291	Gm38235	-2.413	8.3e-05	0.0013	22	34	27	2	5	8	21	35	22	2	6	9
ENSMUSG00000101859	Gm29233	-2.016	0.001	0.0099	42	43	31	1	12	15	40	44	25	1	14	17
ENSMUSG00000107461	RP23-406J21.4	-2.534	7.2e-05	0.0011	33	26	18	2	5	5	31	26	14	2	6	6
ENSMUSG00000097564	C430014B12Rik	-1.872	0.00068	0.0072	58	30	45	9	6	22	55	31	37	8	7	25
ENSMUSG00000104951	Gm43413	1.4	0.00045	0.0051	34	19	27	49	77	83	32	19	22	46	87	98
ENSMUSG00000108466	RP23-64D23.7	-2.59	0.00025	0.0031	15	30	28	3	2	7	14	31	23	3	2	8
ENSMUSG00000010021	Kif19a	6.274	8.6e-05	0.0013	0	0	0	10	6	13	0	0	0	9	7	15
ENSMUSG00000022095	Fam160b2	1.362	6.2e-07	2e-05	169	365	303	555	626	973	161	372	248	526	710	1144
ENSMUSG00000107255	Gm43416	-2.835	0.00017	0.0023	19	16	31	0	4	5	18	16	26	0	4	6
ENSMUSG00000024743	Syt7	1.499	2.5e-05	0.00045	35	46	44	81	108	165	33	47	36	77	122	193
ENSMUSG00000103225	Gm37731	3.21	7.5e-05	0.0012	2	1	2	16	23	14	2	1	2	15	26	17
ENSMUSG00000081272	Gm13509	-2.873	0.0019	0.016	42	16	25	10	0	1	40	16	20	10	0	1
ENSMUSG00000091037	Gm17661	-1.72	0.0055	0.038	47	40	52	27	2	13	45	41	43	26	3	15
ENSMUSG00000022055	Nefl	4.771	6.8e-07	2.2e-05	0	0	5	45	12	76	0	0	4	43	14	88
ENSMUSG00000022758	P2rx6	1.503	0.00011	0.0016	17	32	20	76	63	58	16	33	16	72	72	68
ENSMUSG00000043311	D17H6S53E	1.294	1.8e-07	6.9e-06	151	201	140	539	359	312	144	205	114	511	407	368
ENSMUSG00000108314	RP23-73F23.5	-3.024	0.00013	0.0018	20	21	15	3	0	3	19	21	12	3	0	4
ENSMUSG00000043251	Exoc3l	1.436	0.00021	0.0027	23	30	38	111	79	57	22	31	31	105	90	68
ENSMUSG00000019066	Rab3d	1.081	0.00089	0.009	68	42	52	87	134	122	65	43	42	82	152	143
ENSMUSG00000035299	Mid1	-1.324	0.0011	0.011	109	61	97	41	46	19	104	62	79	39	52	23
ENSMUSG00000046341	Gm11223	-1.918	0.00021	0.0027	41	40	33	16	5	9	39	41	27	15	6	11
ENSMUSG00000064346	mt-Tw	1.886	6.9e-09	3.7e-07	53	89	95	427	227	223	50	91	78	405	258	263
ENSMUSG00000068856	Sf3b4	-1.133	7.6e-08	3.2e-06	888	586	518	316	281	312	845	597	423	299	319	367
ENSMUSG00000086753	Gm15751	-1.746	0.00014	0.002	200	94	168	57	15	65	190	96	137	54	18	76
ENSMUSG00000092381	Gm20512	-2.519	6.5e-05	0.001	29	25	21	2	7	3	28	25	17	2	8	4
ENSMUSG00000022018	Rgcc	-4.211	7.6e-07	2.4e-05	39	70	15	0	5	1	37	71	12	0	6	1
ENSMUSG00000027792	Bche	-1.401	0.0011	0.011	85	58	57	36	27	13	81	59	46	34	30	16
ENSMUSG00000040536	Necab1	1.1	0.00057	0.0062	72	38	49	122	106	115	69	39	40	116	120	135
ENSMUSG00000060550	H2-Q7	2.4	0.0001	0.0015	8	3	4	28	20	32	8	3	3	27	23	38
ENSMUSG00000064246	Chil1	-1.575	8.8e-09	4.6e-07	552	303	305	153	132	104	525	309	249	145	150	123
ENSMUSG00000069272	Hist1h2ae	-1.864	5.9e-05	0.00096	51	34	42	8	15	11	49	35	34	8	17	13
ENSMUSG00000072872	Rybp	-2.427	0.00023	0.0029	26	21	46	1	6	10	25	21	38	1	7	11
ENSMUSG00000080242	Gm15487	-2.461	0.00012	0.0018	35	25	18	2	5	6	33	25	14	2	6	7
ENSMUSG00000100833	Gm28988	-3.487	0.00032	0.0038	19	16	10	0	4	0	18	16	8	0	4	0
ENSMUSG00000105801	C430019N01Rik	-1.986	0.0075	0.048	36	28	47	10	19	0	34	29	39	9	21	0
ENSMUSG00000017713	Tha1	1.408	0.0019	0.017	18	15	38	55	53	81	17	15	32	52	60	95
ENSMUSG00000020894	Vamp2	-1.218	3e-05	0.00053	766	571	455	372	144	254	729	581	371	353	164	299
ENSMUSG00000024795	Kif20b	-1.341	7.3e-05	0.0011	364	437	586	76	223	247	346	445	479	72	253	290
ENSMUSG00000024998	Plce1	1.202	0.00018	0.0024	58	60	52	160	144	86	55	61	42	152	163	102
ENSMUSG00000028976	Slc2a5	1.455	0.00037	0.0043	23	25	27	76	41	88	22	25	22	72	47	103
ENSMUSG00000029452	Tmem116	-1.306	0.00047	0.0052	203	168	114	103	53	40	193	171	93	98	60	48
ENSMUSG00000029797	Sspo	1.76	0.0013	0.012	18	4	18	61	35	39	17	4	15	58	40	46
ENSMUSG00000045174	Amer3	4.539	0.00019	0.0025	0	0	1	11	6	17	0	0	1	10	7	20
ENSMUSG00000069727	Gm5595	-1.396	6e-05	0.00097	69	74	67	24	23	32	66	75	55	23	26	38
ENSMUSG00000087640	Gm14798	-1.4	0.00034	0.004	75	51	97	25	24	35	71	52	80	24	27	41
ENSMUSG00000097162	2310010J17Rik	1.011	0.0015	0.014	82	42	71	135	147	110	78	43	58	128	167	130
ENSMUSG00000097300	Gm26835	-4.653	0.00032	0.0038	9	7	16	0	1	0	9	7	13	0	1	0
ENSMUSG00000099891	Gm5575	1.333	0.00083	0.0084	23	40	26	50	86	90	22	41	21	47	97	106
ENSMUSG00000034459	Ifit1	4.308	4.7e-05	0.00078	0	0	3	7	38	29	0	0	3	6	43	34
ENSMUSG00000037126	Psd	1.642	4.2e-06	9.9e-05	47	93	64	121	266	253	45	95	52	114	301	297
ENSMUSG00000045382	Cxcr4	1.092	1.6e-07	6.2e-06	461	522	371	1217	974	700	439	531	303	1153	1104	824
ENSMUSG00000097275	Gm26648	-1.356	0.00099	0.0097	85	56	79	27	42	17	81	57	65	26	47	20
ENSMUSG00000104107	Gm37879	-2.582	0.00011	0.0016	29	16	23	4	4	3	28	16	19	4	4	4
ENSMUSG00000106946	Gm42856	-3.753	3.6e-06	8.8e-05	45	38	9	3	2	2	43	39	7	3	2	2
ENSMUSG00000006362	Cbfa2t3	1.119	3.8e-06	9.3e-05	211	210	156	464	508	284	201	214	127	440	575	335
ENSMUSG00000020857	Nme2	-1.08	0.00087	0.0088	210	185	124	95	51	100	200	188	101	90	58	117
ENSMUSG00000021676	Iqgap2	-1.254	0.00027	0.0034	67	93	99	30	33	45	64	95	81	28	38	53
ENSMUSG00000027078	Ube2l6	-1.69	0.00053	0.0058	90	45	59	34	15	12	86	46	48	32	17	14
ENSMUSG00000103367	Gm38158	-4.404	9.2e-06	0.0002	21	37	8	1	1	1	20	38	6	1	1	1
ENSMUSG00000106229	Gm19409	1.024	0.00076	0.0079	60	91	71	165	181	108	57	93	58	156	205	127
ENSMUSG00000042707	Dnali1	1.177	0.00032	0.0038	35	34	47	77	86	100	33	35	39	73	97	118
ENSMUSG00000060216	Arrb2	1.004	0.00078	0.008	64	58	61	91	140	137	61	59	50	86	158	161
ENSMUSG00000100632	9430060I03Rik	-2.523	0.00099	0.0097	25	16	27	8	2	2	24	16	22	8	2	2
ENSMUSG00000105272	Gm43071	-2.423	0.00051	0.0056	28	30	15	1	4	8	27	31	12	1	5	9
ENSMUSG00000107634	RP23-133I9.7	-6.067	0.00034	0.004	7	10	7	0	0	0	7	10	6	0	0	0
ENSMUSG00000017740	Slc12a5	1.772	9.7e-05	0.0014	12	10	16	47	43	36	11	10	13	45	49	43
ENSMUSG00000022076	Klhl1	-3.751	1.5e-05	0.0003	37	10	20	1	1	3	35	10	16	1	1	3
ENSMUSG00000023991	Foxp4	-1.181	0.00019	0.0025	105	86	80	37	45	37	100	88	65	35	51	44
ENSMUSG00000029228	Lnx1	-1.89	0.0018	0.015	28	41	34	18	7	3	27	42	28	17	8	4
ENSMUSG00000053166	Cdh22	4.418	3.8e-06	9.3e-05	2	0	1	17	14	47	2	0	1	16	16	54
ENSMUSG00000069372	Ctxn3	-2.065	0.00038	0.0044	40	17	41	8	7	8	38	17	34	8	8	9
ENSMUSG00000085169	Gm10785	-1.135	0.00031	0.0037	86	107	98	51	34	48	82	109	80	48	39	56
ENSMUSG00000086741	Gm15816	-1.059	0.00071	0.0074	214	129	173	110	58	80	204	131	141	104	66	94
ENSMUSG00000097864	Gm26856	-1.346	0.00073	0.0076	93	55	58	32	30	19	89	56	47	30	34	23
ENSMUSG00000104520	Gm37336	4.063	0.00022	0.0028	0	2	0	23	10	8	0	2	0	22	11	10
ENSMUSG00000106874	Gm20186	-1.887	0.0011	0.01	27	43	36	17	4	8	26	44	29	16	5	9
ENSMUSG00000024011	Pi16	4.507	0.00022	0.0028	1	0	0	12	15	6	1	0	0	11	17	7
ENSMUSG00000027222	Pex16	-1.174	7e-05	0.0011	234	148	134	84	74	70	223	151	109	80	84	83
ENSMUSG00000046743	Fat4	-1.217	0.00034	0.004	69	84	101	43	30	37	66	86	83	41	34	43
ENSMUSG00000048582	Gja3	-2.384	0.00077	0.0079	25	27	25	0	9	5	24	27	20	0	10	6
ENSMUSG00000055884	Fancm	-1.062	0.001	0.0098	170	161	228	52	92	124	162	164	187	49	104	145
ENSMUSG00000064493	Snora28	-3.654	0.00025	0.0031	16	9	15	1	1	1	15	9	12	1	1	1
ENSMUSG00000107531	RP23-89F9.3	1.83	8.5e-05	0.0013	15	17	16	56	81	33	14	17	13	53	91	39
ENSMUSG00000108806	RP24-443B5.5	-2.588	0.00069	0.0073	21	27	19	0	3	8	20	27	15	0	3	9
ENSMUSG00000023949	Tcte1	1.131	0.00036	0.0042	57	37	38	94	102	93	54	38	31	89	116	110
ENSMUSG00000041115	Iqsec2	-1.01	0.00033	0.0039	132	117	119	60	71	52	126	119	97	57	80	61
ENSMUSG00000079057	Cyp4v3	-2.019	0.0065	0.044	26	31	47	0	18	8	25	32	39	0	20	9
ENSMUSG00000090551	A730015C16Rik	-2.678	6.5e-05	0.001	89	34	48	1	7	18	85	35	39	1	8	21
ENSMUSG00000096544	Gm4617	-2.027	0.00015	0.0021	43	27	27	5	8	10	41	28	22	5	9	12
ENSMUSG00000096606	Gm4980	3.863	0.002	0.017	0	0	2	15	19	4	0	0	2	14	21	5
ENSMUSG00000099143	Gm27483	-3.751	4e-17	7.3e-15	1318	477	427	84	29	52	1254	486	348	80	33	61
ENSMUSG00000027329	Spef1	1.252	3.1e-05	0.00055	82	75	63	236	131	156	78	76	51	224	149	184
ENSMUSG00000028776	Tinagl1	-1.39	0.00089	0.009	67	55	61	36	16	19	64	56	50	34	18	22
ENSMUSG00000035355	Kcnh4	2.554	0.00022	0.0028	6	1	4	22	25	19	6	1	3	21	28	22
ENSMUSG00000082035	Rpl17-ps8	1.653	0.00042	0.0048	17	14	12	29	61	46	16	14	10	27	69	54
ENSMUSG00000015812	Gnrh1	1.469	0.0029	0.023	12	43	16	49	83	66	11	44	13	46	94	78
ENSMUSG00000020396	Nefh	2.538	0.00044	0.005	0	10	14	29	39	75	0	10	12	27	44	88
ENSMUSG00000025401	Myo1a	1.804	0.0002	0.0026	9	12	12	45	27	45	9	12	10	43	31	53
ENSMUSG00000027577	Chrna4	2.409	0.0015	0.014	2	1	9	22	18	26	2	1	8	21	21	31
ENSMUSG00000028132	Tmem56	1.146	0.00095	0.0094	40	41	37	61	91	109	38	42	30	58	103	128
ENSMUSG00000052616	Ccdc79	1.685	0.00033	0.004	14	10	17	54	31	46	13	10	14	51	35	54
ENSMUSG00000055228	Zfp935	-1.439	0.006	0.041	56	72	44	15	39	9	53	73	36	14	44	11
ENSMUSG00000077758	Gm23527	2.557	1.5e-05	0.0003	5	9	10	53	69	20	5	9	8	50	78	24
ENSMUSG00000079523	Tmsb10	-1.049	0.0023	0.019	21316	17953	16676	11126	3210	12698	20282	18280	13623	10540	3638	14943
ENSMUSG00000087193	Gm14820	-2.455	0.0014	0.013	36	15	20	0	6	6	34	15	16	0	7	7
ENSMUSG00000015085	Entpd2	2.957	0.0015	0.014	6	0	0	22	12	18	6	0	0	21	14	21
ENSMUSG00000020218	Wif1	1.131	0.0019	0.017	50	63	26	126	93	88	48	64	21	119	106	104
ENSMUSG00000021257	Angel1	1.17	0.001	0.0098	28	37	47	97	64	94	27	38	39	92	73	110
ENSMUSG00000026389	Steap3	-1.466	0.00026	0.0032	60	54	53	23	13	24	57	55	43	22	15	28
ENSMUSG00000030397	Mark4	-2.782	0.00043	0.0048	26	15	13	3	4	1	25	15	10	3	4	1
ENSMUSG00000032436	Cmtm7	-1.34	1.2e-06	3.5e-05	579	382	298	186	115	197	551	389	243	176	131	231
ENSMUSG00000032523	Hhatl	1.877	0.00016	0.0021	38	13	13	111	69	53	36	13	10	105	78	63
ENSMUSG00000033458	Fan1	-1.673	0.0008	0.0082	42	48	48	5	14	23	40	49	39	5	16	27
ENSMUSG00000035458	Tnni3	1.392	0.0014	0.013	31	17	27	40	71	86	30	17	22	38	80	101
ENSMUSG00000090779	Gm17110	2.537	0.00064	0.0068	3	5	3	10	29	25	3	5	2	9	33	29
ENSMUSG00000092741	Mir3074-1	-2.326	0.0024	0.02	29	15	28	6	8	0	28	15	23	6	9	0
ENSMUSG00000093264	Gm23419	-3.005	0.00077	0.0079	15	13	21	4	0	2	14	13	17	4	0	2
ENSMUSG00000107560	RP23-89P21.6	1.085	0.00091	0.0091	46	60	38	87	128	92	44	61	31	82	145	109
ENSMUSG00000066714	Gm8062	1.185	0.00076	0.0079	33	49	28	69	88	94	31	50	23	65	100	111
ENSMUSG00000079053	Gm14010	-4.215	2.7e-05	0.00048	33	11	13	0	0	3	32	11	10	0	0	3
ENSMUSG00000016346	Kcnq2	1.847	0.0018	0.016	2	10	17	34	34	36	2	10	14	32	39	42
ENSMUSG00000021991	Cacna2d3	1.677	0.0012	0.012	7	19	15	55	24	52	7	19	12	52	28	61
ENSMUSG00000075312	Gm13597	-5.951	0.00098	0.0097	13	4	6	0	0	0	12	4	5	0	0	0
ENSMUSG00000095098	Ccdc85b	-1.137	0.0002	0.0026	328	250	188	110	77	161	312	255	153	104	88	189
ENSMUSG00000103284	3110080O07Rik	1.299	0.00074	0.0077	25	36	27	98	70	51	24	37	22	93	79	61
ENSMUSG00000028278	Rragd	1.056	3.1e-08	1.4e-06	1476	1464	1254	3871	2439	2411	1404	1491	1024	3667	2764	2838
ENSMUSG00000021071	Trim9	3.826	5.9e-05	0.00095	0	0	8	68	33	16	0	0	7	65	38	20
ENSMUSG00000030678	Maz	-1.021	0.00039	0.0045	405	370	241	205	100	196	385	377	196	194	114	230
ENSMUSG00000097327	E030030I06Rik	-1.198	0.00066	0.007	76	66	117	37	37	38	72	67	96	35	42	45
ENSMUSG00000032246	Calml4	1.104	0.0018	0.016	45	39	38	59	91	113	43	40	31	56	103	133
ENSMUSG00000032537	Ephb1	1.649	0.00022	0.0028	16	14	11	35	41	53	15	14	9	33	46	62
ENSMUSG00000073846	Gm12526	6.032	0.0012	0.012	0	0	0	9	2	13	0	0	0	9	2	15
ENSMUSG00000097988	Gm10535	1.097	0.0006	0.0064	40	51	39	78	110	91	38	52	32	74	125	107
ENSMUSG00000040287	Stac3	-1.129	0.0016	0.014	161	114	93	79	38	52	153	116	76	75	43	61
ENSMUSG00000048482	Bdnf	1.019	8.4e-06	0.00018	266	292	261	358	673	627	253	297	213	339	762	738
ENSMUSG00000053925	Gm9929	-1.3	0.0017	0.015	64	60	65	39	22	16	61	61	53	37	25	19
ENSMUSG00000055805	Fmnl1	-1.546	0.00029	0.0035	115	57	70	40	20	23	110	58	57	38	23	27
ENSMUSG00000051703	Tmem198	1.239	0.00094	0.0094	44	30	20	78	66	80	42	31	16	74	75	94
ENSMUSG00000067547	Gm7666	-1.557	0.00071	0.0075	46	51	36	22	10	13	44	52	29	21	12	15
ENSMUSG00000075000	Nrbf2	-1.409	0.0007	0.0074	68	41	72	15	26	27	65	42	59	14	29	32
ENSMUSG00000104420	E230020A03Rik	1.279	0.00053	0.0058	39	86	94	111	216	206	37	88	77	105	244	242
ENSMUSG00000105813	Gm42928	-2.866	3.9e-13	4.5e-11	453	182	172	35	41	35	431	185	140	33	46	41
ENSMUSG00000029544	Cabp1	2.098	0.00015	0.002	9	7	11	60	25	32	9	7	9	57	29	38
ENSMUSG00000061082	Plac1	-2.201	0.0073	0.048	28	21	20	11	3	0	27	21	16	11	4	0
ENSMUSG00000031628	Casp3	-1.371	0.00078	0.008	80	50	49	16	25	28	76	51	40	15	28	33
ENSMUSG00000035606	Ky	2.055	0.0024	0.02	4	3	12	25	17	37	4	3	10	24	20	43
ENSMUSG00000051851	Cxx1c	-2.61	0.0019	0.016	17	16	22	6	3	0	16	16	18	6	3	0
ENSMUSG00000072214	2024-09-05	-2.214	0.0048	0.034	32	19	17	10	3	1	31	19	14	10	4	1
ENSMUSG00000074405	Zfp865	1.036	0.0018	0.015	47	54	43	70	122	105	45	55	35	66	138	123
ENSMUSG00000095403	Gm21092	-1.19	0.00061	0.0066	85	73	69	36	39	24	81	74	56	34	44	29
ENSMUSG00000104867	Gm43728	2.152	0.00016	0.0022	5	7	5	20	29	28	5	7	4	19	33	33
ENSMUSG00000108274	RP24-183K24.2	-3.873	0.0029	0.023	16	3	14	2	0	0	15	3	12	2	0	0
ENSMUSG00000048827	Pkd1l3	-1.453	0.0012	0.011	48	51	56	20	28	9	46	52	46	19	31	11
ENSMUSG00000049799	Lrrc19	-2.421	0.00068	0.0071	13	26	23	5	2	4	12	26	19	5	2	5
ENSMUSG00000087231	E230016M11Rik	-1.103	3.4e-05	0.0006	764	549	433	361	173	279	727	559	353	342	197	328
ENSMUSG00000101952	Gm10550	-3.859	0.0022	0.019	8	18	5	0	0	2	8	18	4	0	0	2
ENSMUSG00000105217	Gm42873	-5.989	0.0016	0.014	2	14	7	0	0	0	2	14	6	0	0	0
ENSMUSG00000106491	Gm42446	2.522	0.00052	0.0057	3	1	6	23	20	15	3	1	5	22	23	18
ENSMUSG00000052302	Tbc1d30	2.038	0.0005	0.0056	5	6	8	18	28	35	5	6	7	17	32	41
ENSMUSG00000079489	C030013D06Rik	-2.809	0.00055	0.006	18	20	10	2	4	1	17	20	8	2	4	1
ENSMUSG00000103199	Gm37648	-3.313	0.00098	0.0097	10	12	18	0	4	0	9	12	15	0	4	0
ENSMUSG00000104965	Gm43437	2.343	0.00032	0.0038	4	5	4	18	31	18	4	5	3	17	35	21
ENSMUSG00000037363	Letm2	1.213	0.00033	0.004	71	48	62	171	164	87	68	49	51	162	186	103
ENSMUSG00000058173	Smco4	1.437	0.00034	0.004	29	74	67	91	168	200	27	75	55	86	190	235
ENSMUSG00000090861	Arf4os	-2.949	0.00022	0.0028	16	15	15	2	1	3	15	15	12	2	1	3
ENSMUSG00000101878	Gm8203	-1.578	0.00041	0.0046	133	59	111	43	16	43	127	60	91	41	18	50
ENSMUSG00000104525	Gm37334	-6.007	0.0012	0.011	4	5	14	0	0	0	4	5	12	0	0	0
ENSMUSG00000007030	Vwa7	1.043	0.0011	0.01	34	49	56	99	89	98	32	50	46	94	101	115
ENSMUSG00000028528	Dnajc6	2.445	0.0061	0.042	0	2	17	52	17	40	0	2	15	49	20	47
ENSMUSG00000028950	Tas1r1	1.02	0.00017	0.0022	104	106	93	274	167	176	99	108	76	260	189	207
ENSMUSG00000032186	Tmod2	-1.459	0.007	0.046	63	102	107	7	53	40	60	104	88	6	59	47
ENSMUSG00000039372	2024-03-04	3.978	0.00092	0.0092	0	0	2	10	7	24	0	0	2	9	8	28
ENSMUSG00000043340	6530409C15Rik	-2.642	0.0053	0.037	18	26	9	1	0	7	17	26	7	1	0	8
ENSMUSG00000096736	Gm17535	2.05	0.0032	0.025	1	10	8	22	41	18	1	10	7	21	46	22
ENSMUSG00000106837	D630030B08Rik	4.672	0.00048	0.0053	0	0	1	19	16	2	0	0	1	18	18	3
ENSMUSG00000019235	Rps6kl1	1.318	0.00054	0.006	21	29	25	72	68	48	20	30	20	68	77	57
ENSMUSG00000044024	Rell2	1.124	0.0011	0.011	36	50	33	101	67	93	34	51	27	96	76	109
ENSMUSG00000046178	Nxph1	3.183	0.00021	0.0027	1	2	1	18	10	14	1	2	1	17	12	16
ENSMUSG00000046388	Gm9806	-1.421	0.0014	0.013	50	61	55	10	21	31	48	62	45	9	24	36
ENSMUSG00000103706	6820402A03Rik	-2.042	0.0023	0.019	19	30	36	1	13	7	18	31	30	1	14	8
ENSMUSG00000106317	Gm43848	1.765	0.0027	0.022	7	5	17	24	31	44	7	5	14	23	35	51
ENSMUSG00000000686	Abhd15	-1.675	0.00064	0.0068	36	38	44	10	20	7	34	39	36	9	22	9
ENSMUSG00000035357	Pdzrn3	1.011	0.002	0.017	125	71	62	127	185	207	119	72	50	120	210	243
ENSMUSG00000057963	Itpk1	1.099	0.00055	0.006	40	46	37	96	74	94	38	47	30	91	84	111
ENSMUSG00000060240	Cend1	1.279	0.00044	0.0049	29	22	27	62	54	73	28	22	22	59	61	86
ENSMUSG00000091475	2810468N07Rik	1.199	0.0016	0.014	24	38	35	93	82	51	23	39	29	88	93	60
ENSMUSG00000029287	Tgfbr3	-1.709	0.0013	0.012	53	27	28	11	15	7	51	28	23	10	17	9
ENSMUSG00000081046	Gm12846	1.606	0.0013	0.012	18	10	15	61	41	27	17	10	12	58	47	32
ENSMUSG00000084284	Tpt1-ps6	1.209	0.00046	0.0051	30	26	35	78	63	70	29	26	29	74	72	82
ENSMUSG00000093668	Pou5f2	1.472	0.00056	0.0061	15	17	19	34	55	53	14	17	16	32	62	62
ENSMUSG00000103138	Gm2238	2.545	0.0037	0.028	1	1	7	15	27	13	1	1	6	14	30	15
ENSMUSG00000075012	Fjx1	1.694	0.0011	0.01	9	9	14	23	35	48	9	9	12	22	40	56
ENSMUSG00000105302	Gm19817	1.129	1.5e-05	0.0003	472	364	226	794	986	546	449	371	184	752	1117	643
ENSMUSG00000108035	RP23-251M14.4	2.117	0.00056	0.0061	9	3	5	30	24	23	9	3	4	28	27	27
ENSMUSG00000005397	Nid1	-1.026	0.00095	0.0095	289	362	419	87	190	249	275	369	343	82	215	292
ENSMUSG00000010051	Hyal1	1.23	0.00096	0.0095	22	37	31	89	62	62	21	38	25	84	70	73
ENSMUSG00000035399	Oser1	-1.057	0.00081	0.0082	91	85	94	53	35	42	87	87	77	50	40	50
ENSMUSG00000072612	Gm10382	-2.199	1.3e-05	0.00026	103	53	40	15	9	19	98	54	32	14	10	22
ENSMUSG00000074001	Klhl40	1.166	4e-06	9.6e-05	622	618	339	1254	1498	794	592	629	276	1188	1697	935
ENSMUSG00000103959	Gm37720	-4.994	0.00013	0.0019	6	26	9	0	1	0	6	26	7	0	1	0
ENSMUSG00000030034	Ino80b	-1.87	9.4e-06	0.0002	191	114	78	19	43	43	182	116	63	18	48	50
ENSMUSG00000032717	Mdfi	1.979	0.00041	0.0047	6	6	8	22	35	25	6	6	7	21	40	29
ENSMUSG00000034009	Rxfp1	1.012	0.0038	0.029	61	64	36	75	133	117	58	65	29	71	150	138
ENSMUSG00000054967	Zfp647	-3.062	0.0036	0.027	12	30	11	6	0	0	11	30	9	6	0	0
ENSMUSG00000072762	4930522L14Rik	-1.155	0.0031	0.024	64	84	61	46	24	24	61	86	50	44	27	29
ENSMUSG00000101172	Gm28535	-3.053	0.00095	0.0095	19	9	13	2	1	2	18	9	11	2	1	2
ENSMUSG00000108597	RP24-100O13.2	4.25	0.0011	0.011	0	0	1	4	8	16	0	0	1	4	9	18
ENSMUSG00000015968	Cacna1d	1.305	0.00057	0.0062	20	24	28	62	47	67	19	24	23	59	54	79
ENSMUSG00000029119	Man2b2	1.104	0.0022	0.019	40	34	43	106	56	89	38	35	35	101	64	105
ENSMUSG00000031297	Slc7a3	-1.205	0.001	0.0098	131	85	71	31	54	40	125	87	58	29	61	47
ENSMUSG00000047678	Gpr82	-5.794	0.0028	0.022	2	11	7	0	0	0	2	11	6	0	0	0
ENSMUSG00000071035	Gm5499	-4.385	0.0018	0.016	12	4	11	0	0	1	11	4	9	0	0	1
ENSMUSG00000091955	Gm9844	-1.179	0.001	0.0099	360	240	220	156	52	153	343	244	179	148	60	180
ENSMUSG00000094613	A630076J17Rik	1.49	0.0033	0.025	18	8	20	28	51	51	17	8	17	26	58	60
ENSMUSG00000097791	Gm17315	-2.741	1.2e-06	3.5e-05	86	28	41	6	8	9	82	29	33	6	9	10
ENSMUSG00000105328	Gm43180	-3.45	0.0022	0.019	5	19	10	1	0	2	5	19	8	1	0	2
ENSMUSG00000026994	Galnt3	-3.2	0.0012	0.011	16	13	9	2	0	2	15	13	7	2	0	2
ENSMUSG00000050345	4930486L24Rik	-3.821	0.0014	0.013	11	7	13	0	2	0	10	7	11	0	2	0
ENSMUSG00000068141	Gm10232	-1.888	0.00069	0.0073	43	22	25	7	6	10	41	22	20	7	7	12
ENSMUSG00000074277	Phldb3	1.452	0.002	0.017	28	13	13	45	64	38	27	13	10	43	72	45
ENSMUSG00000106663	Gm42839	-3.241	0.0011	0.011	11	15	12	0	4	0	10	15	10	0	4	0
ENSMUSG00000106834	Gm10459	-1.224	0.004	0.03	77	70	37	35	21	23	73	71	30	33	24	27
ENSMUSG00000085304	Gm12802	1.753	0.00018	0.0024	16	55	27	153	114	65	15	56	22	145	129	77
ENSMUSG00000085691	Gm14216	1.871	0.00095	0.0095	4	11	10	40	21	31	4	11	8	38	24	36
ENSMUSG00000018238	Gdf9	1.158	0.0012	0.011	40	40	24	93	73	67	38	41	19	88	83	79
ENSMUSG00000081113	Gm7308	-2.652	0.00055	0.006	15	16	18	3	4	1	14	16	15	3	4	1
ENSMUSG00000085348	Gm12300	1.402	1.7e-07	6.6e-06	2171	3217	1766	7800	7441	3668	2066	3276	1442	7389	8433	4317
ENSMUSG00000104140	Gm37140	-3.465	0.0019	0.017	11	9	14	0	3	0	10	9	12	0	3	0
ENSMUSG00000036790	Slitrk2	1.607	0.0021	0.017	7	9	20	37	44	30	7	9	17	35	50	36
ENSMUSG00000065080	Gm26497	1.652	0.00052	0.0057	11	13	12	42	43	27	10	13	10	40	49	32
ENSMUSG00000020641	Rsad2	2.145	0.00033	0.0039	5	14	9	58	48	18	5	14	7	55	54	22
ENSMUSG00000038594	Cep85l	-1.362	0.0017	0.015	49	60	47	16	31	13	47	61	38	15	35	16
ENSMUSG00000048174	Tmem81	-1.311	0.00045	0.005	54	56	59	26	18	24	51	57	48	25	20	28
ENSMUSG00000084411	Gm11510	1.297	0.0017	0.015	29	20	23	77	62	40	28	20	19	73	70	47
ENSMUSG00000000958	Slc7a7	1.344	0.00023	0.0029	46	56	37	76	111	167	44	57	30	72	126	196
ENSMUSG00000041237	Pklr	4.366	0.00019	0.0025	1	0	1	25	25	2	1	0	1	24	28	3
ENSMUSG00000097971	Gm26917	-1.634	3.2e-11	2.8e-09	2417	1301	1074	515	518	511	2300	1325	877	488	587	601
ENSMUSG00000103984	Gm37447	1.266	0.002	0.017	29	22	22	47	82	48	28	22	18	44	92	57
ENSMUSG00000108555	RP23-137A24.3	1.025	0.0019	0.016	46	33	51	101	71	94	44	34	42	96	81	110
ENSMUSG00000084970	1700060J05Rik	-1.367	0.0015	0.013	58	52	37	24	14	19	55	53	30	23	16	22
ENSMUSG00000022441	Efcab6	2.151	0.0019	0.016	2	4	8	18	18	29	2	4	7	17	20	34
ENSMUSG00000027474	Ccm2l	3.891	0.00042	0.0047	1	0	1	22	10	6	1	0	1	21	11	7
ENSMUSG00000028441	1110017D15Rik	2.081	0.0009	0.009	5	4	7	26	16	28	5	4	6	25	18	33
ENSMUSG00000073656	Gm10558	4.448	0.00069	0.0073	0	0	1	19	9	4	0	0	1	18	10	5
ENSMUSG00000079564	Gm11149	-1.193	1.8e-05	0.00035	663	444	337	290	186	156	631	452	275	275	211	184
ENSMUSG00000069892	9930111J21Rik2	-5.693	0.0024	0.019	5	10	4	0	0	0	5	10	3	0	0	0
ENSMUSG00000091474	2610021A01Rik	-1.183	0.00041	0.0046	147	223	116	49	88	77	140	227	94	46	100	90
ENSMUSG00000107023	Gm42715	-1.234	0.0052	0.037	60	47	72	40	21	15	57	48	59	38	24	18
ENSMUSG00000021078	Tomm20l	1.225	0.0017	0.015	19	30	29	54	79	52	18	31	24	51	89	61
ENSMUSG00000052854	Nrk	1.452	0.0025	0.021	13	19	17	28	64	42	12	19	14	26	72	49
ENSMUSG00000048965	Mrgpre	1.41	4e-06	9.6e-05	81	77	84	312	160	171	77	78	69	296	182	202
ENSMUSG00000044595	Dnd1	1.017	0.0021	0.017	44	52	41	110	67	101	42	53	33	104	76	119
ENSMUSG00000081087	Rps15a-ps7	1.416	0.0015	0.014	22	16	14	32	56	50	21	16	11	30	63	59
ENSMUSG00000024965	Fermt3	1.918	0.00094	0.0094	4	10	7	35	21	26	4	10	6	33	24	31
ENSMUSG00000086430	4930551O13Rik	-2.208	0.0022	0.018	11	29	22	4	6	2	10	29	18	4	7	3
ENSMUSG00000102252	Snrpn	-1.198	0.0036	0.027	299	204	244	202	51	73	285	208	199	192	58	86
ENSMUSG00000035829	Ppp1r26	-1.026	0.0035	0.027	92	65	109	54	32	44	88	66	89	51	37	52
ENSMUSG00000043623	4933412A08Rik	-1.734	0.0075	0.048	54	31	62	4	32	7	51	32	51	4	36	9
ENSMUSG00000093076	Mir3082	-1.596	0.0025	0.02	38	41	30	12	5	19	36	42	24	11	6	22
ENSMUSG00000002409	Dyrk1b	-1.388	0.00071	0.0074	53	37	56	20	19	16	50	38	46	19	22	19
ENSMUSG00000044201	Cdc25c	-1.068	0.00024	0.0031	168	156	267	97	75	110	160	159	219	92	85	129
ENSMUSG00000038550	Ciart	-1.365	0.00082	0.0083	62	40	45	19	19	20	59	41	37	18	21	23
ENSMUSG00000053646	Plxnb1	1.01	5.1e-06	0.00012	240	259	251	685	428	399	228	264	205	649	485	470
ENSMUSG00000027560	Dok5	-1.401	5.8e-06	0.00013	465	272	219	160	93	109	443	277	178	152	106	128
ENSMUSG00000037636	Slc25a43	-1.565	0.0043	0.031	35	52	24	6	19	12	33	53	19	6	21	14
ENSMUSG00000084843	B230312C02Rik	1.739	5.2e-07	1.8e-05	82	94	72	383	313	135	78	96	59	363	355	160
ENSMUSG00000028214	Gem	-1.08	0.0049	0.035	97	51	88	43	26	42	92	52	72	41	30	49
ENSMUSG00000089365	Gm23823	4.185	0.00075	0.0077	0	1	0	8	8	9	0	1	0	8	9	11
ENSMUSG00000033685	Ucp2	-1.276	3.6e-05	0.00062	384	179	269	150	86	108	366	182	220	142	98	127
ENSMUSG00000067189	Gm7335	-5.694	0.004	0.03	2	12	5	0	0	0	2	12	4	0	0	0
ENSMUSG00000074165	Zfp788	1.025	0.00026	0.0032	102	137	179	376	263	212	97	139	147	356	298	250
ENSMUSG00000084978	Gm11655	2.09	0.0041	0.03	3	12	1	28	30	13	3	12	1	27	34	16
ENSMUSG00000091580	Gm6467	-1.391	0.0014	0.013	58	44	36	17	13	22	55	45	29	16	15	26
ENSMUSG00000102297	5730585A16Rik	1.021	0.002	0.017	49	31	44	96	74	83	47	32	36	91	84	98
ENSMUSG00000105041	Gm42676	1.685	0.00024	0.003	20	35	20	40	89	114	19	36	16	38	101	133
ENSMUSG00000052496	Pkdrej	4.16	0.0014	0.013	0	1	0	5	8	12	0	1	0	5	9	14
ENSMUSG00000058542	Gm15590	-1.392	0.00073	0.0076	51	43	45	16	15	22	49	44	37	15	17	26
ENSMUSG00000085925	Rtl1	1.133	0.0027	0.022	30	29	29	46	66	84	29	30	24	43	75	99
ENSMUSG00000027171	Prrg4	-1.979	0.0016	0.014	63	25	36	2	16	13	60	26	29	2	18	15
ENSMUSG00000036466	Megf11	1.015	0.0036	0.027	56	44	29	78	103	80	53	45	23	74	116	94
ENSMUSG00000045294	Insig1	1.279	8.3e-07	2.6e-05	210	160	233	695	419	351	200	163	191	659	475	413
ENSMUSG00000048764	Tmprss11f	-6.365	0.0023	0.019	16	0	14	0	0	0	15	0	12	0	0	0
ENSMUSG00000089145	Gm25265	2.697	0.0021	0.018	2	1	4	23	13	8	2	1	3	22	15	10
ENSMUSG00000056671	Prelid2	-1.154	0.00062	0.0066	181	267	327	59	138	151	172	272	268	56	156	177
ENSMUSG00000087644	Gm14703	1.157	0.0017	0.015	30	31	29	87	67	50	29	32	24	83	76	59
ENSMUSG00000097839	Gm26909	-1.055	0.0017	0.015	64	85	94	32	46	39	61	87	77	30	52	46
ENSMUSG00000033857	Engase	1.165	0.0025	0.021	29	18	34	56	61	65	28	18	28	53	69	76
ENSMUSG00000038298	Pdzk1	1.039	0.002	0.017	34	42	44	103	75	69	32	43	36	98	85	81
ENSMUSG00000042254	Cilp	2.707	3.9e-05	0.00067	4	6	5	25	17	58	4	6	4	24	20	67
ENSMUSG00000038393	Txnip	1.057	0.00092	0.0092	216	114	88	321	338	211	206	116	71	304	383	249
ENSMUSG00000097816	Gm26811	-1.623	0.0052	0.036	64	26	50	19	4	22	61	27	41	18	5	26
ENSMUSG00000107406	RP23-402P24.5	-1.024	0.0036	0.027	116	158	188	41	106	79	110	161	154	39	120	93
ENSMUSG00000051238	Swsap1	1.047	0.0013	0.012	32	40	40	78	71	83	30	41	33	74	80	98
ENSMUSG00000073910	Mob3b	-2.081	0.0021	0.017	29	10	28	4	6	5	28	10	23	4	7	6
ENSMUSG00000103202	Gm37326	3.006	0.0023	0.019	3	0	1	16	13	8	3	0	1	15	15	10
ENSMUSG00000032744	Heyl	1.039	0.004	0.03	54	35	43	86	122	63	51	36	35	81	138	75
ENSMUSG00000070632	Btbd8	-2.587	0.0013	0.012	15	13	18	1	5	2	14	13	15	1	5	2
ENSMUSG00000102340	Gm37379	-1.937	0.0015	0.014	24	29	20	2	7	10	23	30	16	2	8	11
ENSMUSG00000018486	Wnt9b	4.099	0.0017	0.015	0	0	1	7	13	5	0	0	1	7	14	6
ENSMUSG00000024905	Mtl5	1.1	0.0017	0.015	43	32	25	73	72	70	41	33	20	69	82	83
ENSMUSG00000041372	B4galnt3	5.705	0.0016	0.014	0	0	0	4	8	7	0	0	0	4	9	8
ENSMUSG00000065820	Gm26316	5.707	0.0022	0.019	0	0	0	5	3	10	0	0	0	5	4	12
ENSMUSG00000083306	Gm13868	1.339	0.00032	0.0039	36	40	54	86	161	81	34	41	44	81	182	96
ENSMUSG00000079022	Col22a1	1.418	0.004	0.029	6	25	17	39	45	45	6	25	14	37	51	53
ENSMUSG00000082321	Gm14253	-2.771	0.0014	0.013	17	12	11	1	4	1	16	12	9	1	4	1
ENSMUSG00000003746	Man1a	-1.093	0.0036	0.027	65	68	76	41	20	37	62	69	62	39	23	43
ENSMUSG00000085211	B430219N15Rik	-2.112	0.0012	0.012	22	24	15	3	7	3	21	24	12	3	8	4
ENSMUSG00000098204	Gm26984	-6.021	0.0012	0.011	4	16	4	0	0	0	4	16	3	0	0	0
ENSMUSG00000040972	Igsf21	4.071	0.0019	0.016	0	0	1	5	7	12	0	0	1	5	8	14
ENSMUSG00000085962	Gm16984	-1.414	0.0014	0.013	32	52	40	18	15	14	30	53	33	17	17	16
ENSMUSG00000098816	Gm27786	-1.51	0.0028	0.022	46	39	29	6	20	14	44	40	23	6	22	16
ENSMUSG00000079355	Ackr4	-1.41	0.0015	0.014	35	39	57	18	19	13	33	40	47	17	21	15
ENSMUSG00000020181	Nav3	1.22	3.8e-05	0.00065	109	117	108	162	367	250	104	119	88	153	415	294
ENSMUSG00000025129	Ppp1r27	-1.497	2.8e-06	7.1e-05	784	418	363	255	187	113	746	426	296	242	212	133
ENSMUSG00000026571	Dcaf6	1.153	1.5e-06	4.2e-05	231	276	253	780	533	381	220	281	207	739	604	449
ENSMUSG00000017734	Dbndd2	-2.097	0.0019	0.016	18	38	15	3	8	5	17	39	12	3	9	6
ENSMUSG00000053821	Gm9922	-4.155	0.0028	0.022	7	8	7	0	1	0	7	8	6	0	1	0
ENSMUSG00000103882	Gm37452	1.742	1.5e-05	0.00029	31	58	42	89	226	122	29	59	34	84	255	144
ENSMUSG00000037029	Zfp146	-1.458	0.0071	0.047	51	25	58	23	20	6	49	26	48	22	22	8
ENSMUSG00000084583	Gm25177	1.824	0.0017	0.015	5	7	10	27	33	18	5	7	8	26	37	21
ENSMUSG00000021792	Fam213a	1.246	0.0029	0.023	22	25	20	48	39	72	21	25	16	45	44	84
ENSMUSG00000101651	Gm28402	-4.139	0.0073	0.048	2	13	7	0	1	0	2	13	6	0	1	0
ENSMUSG00000103200	Gm37328	1.459	0.0046	0.033	25	9	9	38	34	46	24	9	7	36	39	54
ENSMUSG00000066175	2510046G10Rik	-1.292	0.0031	0.024	66	45	35	17	18	25	63	46	28	16	20	29
ENSMUSG00000085030	2810455O05Rik	1.549	0.0022	0.019	11	12	12	26	27	48	10	12	10	25	31	56
ENSMUSG00000097903	Gm26679	-3.293	0.0016	0.014	16	8	6	0	1	2	15	8	5	0	1	2
ENSMUSG00000032420	Nt5e	-1.153	0.0066	0.044	79	44	77	21	24	45	75	45	63	20	27	52
ENSMUSG00000045391	1700120B22Rik	-5.549	0.0038	0.028	8	5	4	0	0	0	8	5	3	0	0	0
ENSMUSG00000046456	Tmem150b	2.609	0.0034	0.026	4	0	2	11	13	18	4	0	2	10	15	21
ENSMUSG00000090399	Gm38399	2.303	0.0042	0.031	5	0	5	14	23	13	5	0	4	13	26	16
ENSMUSG00000029844	Hoxa1	-1.069	0.0038	0.028	80	67	73	29	25	51	76	68	60	27	29	59
ENSMUSG00000082454	Gm12183	-1.642	0.0011	0.01	34	29	29	10	7	13	32	30	24	9	8	15
ENSMUSG00000033066	Gas7	-1.237	0.00089	0.009	162	124	70	52	37	62	154	126	57	49	42	73
ENSMUSG00000046761	Fam83h	1.253	0.0019	0.017	25	34	25	96	50	56	24	35	20	91	57	66
ENSMUSG00000062713	Sim2	1.05	0.0029	0.023	40	55	67	149	76	110	38	56	55	141	87	130
ENSMUSG00000103034	Gm8797	-1.641	0.0015	0.014	30	27	34	14	7	8	29	27	28	13	8	10
ENSMUSG00000022025	Lect1	5.629	0.0027	0.022	0	0	0	3	9	6	0	0	0	3	10	7
ENSMUSG00000023216	Epb42	3.459	0.0059	0.04	0	0	2	13	9	7	0	0	2	12	10	8
ENSMUSG00000041567	Serpina12	1.764	0.0037	0.028	12	5	12	34	48	16	11	5	10	32	54	19
ENSMUSG00000053030	Spink2	-3.57	0.0054	0.037	3	11	12	1	0	1	3	11	10	1	0	1
ENSMUSG00000059060	Rad51b	-3.619	0.0036	0.027	7	6	13	0	1	1	7	6	11	0	1	1
ENSMUSG00000087006	Gm13889	1.36	0.00021	0.0027	47	78	43	200	143	90	45	79	35	190	162	106
ENSMUSG00000094185	Gm5445	1.447	0.0041	0.031	13	8	19	28	46	35	12	8	16	26	52	41
ENSMUSG00000097620	4921514A10Rik	-1.817	0.0016	0.014	37	42	82	26	5	14	35	43	68	25	6	17
ENSMUSG00000097751	Gm26690	-1.071	0.0028	0.022	62	74	65	34	39	23	59	75	53	32	44	27
ENSMUSG00000097815	Gm26809	-1.279	0.0023	0.019	54	53	38	16	27	17	51	54	31	15	30	20
ENSMUSG00000102241	Gm37716	1.96	0.0015	0.014	4	7	6	28	18	21	4	7	5	27	21	25
ENSMUSG00000009731	Kcnd1	2.087	0.0063	0.043	10	1	5	37	19	14	10	1	4	35	22	17
ENSMUSG00000021612	Slc6a18	5.608	0.0044	0.032	0	0	0	8	2	8	0	0	0	8	2	9
ENSMUSG00000022512	Cldn1	-1.983	0.00052	0.0058	21	43	66	16	11	7	20	44	55	15	12	8
ENSMUSG00000027570	Col9a3	1.115	0.003	0.024	21	30	33	52	73	59	20	31	27	49	82	69
ENSMUSG00000034437	Gm9761	-2.59	0.002	0.017	18	13	10	2	1	3	17	13	8	2	1	4
ENSMUSG00000082396	Zfp389	1.139	0.0023	0.019	31	29	23	77	61	49	30	30	19	73	69	58
ENSMUSG00000082743	Gm12988	-1.649	0.0012	0.011	27	25	39	11	9	9	26	25	32	10	10	11
ENSMUSG00000085802	Gm16059	-2.552	0.0048	0.034	18	17	5	2	4	1	17	17	4	2	4	1
ENSMUSG00000085923	Gm12781	5.618	0.0027	0.022	0	0	0	8	6	3	0	0	0	8	7	4
ENSMUSG00000088493	Gm24401	-4.059	0.007	0.046	2	10	10	1	0	0	2	10	8	1	0	0
ENSMUSG00000090081	Gm16587	-2.096	0.0054	0.038	15	24	21	1	10	2	14	24	17	1	11	3
ENSMUSG00000090706	Gm17233	-1.402	0.0022	0.018	42	35	39	20	10	14	40	36	32	19	12	16
ENSMUSG00000102670	Gm37436	-1.508	0.0014	0.013	31	38	40	7	16	15	29	39	33	7	18	17
ENSMUSG00000001333	Sync	-1.171	0.00024	0.003	239	138	118	73	77	70	228	141	96	69	87	83
ENSMUSG00000006546	Cryba2	5.557	0.0034	0.026	0	0	0	3	8	6	0	0	0	3	9	7
ENSMUSG00000016520	Lnx2	-1.008	0.0076	0.049	109	82	54	41	31	50	104	84	44	39	35	59
ENSMUSG00000029136	Rbks	-1.693	0.0041	0.03	33	30	18	5	13	6	31	31	14	5	15	7
ENSMUSG00000038406	Scaf1	-1.747	7.3e-05	0.0011	177	87	76	25	24	52	169	89	62	24	27	61
ENSMUSG00000048939	Atp13a5	1.655	6.5e-07	2.1e-05	143	181	86	644	397	253	136	184	70	610	450	298
ENSMUSG00000056316	Gm9996	3.421	0.003	0.024	1	0	1	4	14	8	1	0	1	4	16	10
ENSMUSG00000061104	Gm10094	-1.152	0.0076	0.049	46	67	47	32	14	26	44	68	38	30	16	31
ENSMUSG00000063564	Col23a1	1.431	0.0023	0.019	11	15	15	28	36	44	10	15	12	26	41	52
ENSMUSG00000075053	Vdac3-ps1	-1.24	0.0018	0.016	47	46	50	26	17	18	45	47	41	25	19	21
ENSMUSG00000079505	Gm11131	2.568	0.0019	0.017	1	2	4	14	13	14	1	2	3	13	15	16
ENSMUSG00000085286	Ube4bos3	-4.137	0.0072	0.047	14	2	7	1	0	0	13	2	6	1	0	0
ENSMUSG00000087273	Gm13203	-2.015	0.0076	0.049	18	25	20	0	6	9	17	25	16	0	7	10
ENSMUSG00000087431	Gm16054	-2.242	0.0064	0.043	16	23	8	5	4	1	15	23	6	5	4	1
ENSMUSG00000097553	4930455D15Rik	-5.52	0.0068	0.045	2	11	4	0	0	0	2	11	3	0	0	0
ENSMUSG00000097800	B230344G16Rik	-1.949	0.0015	0.014	20	24	21	3	8	5	19	24	17	3	9	6
ENSMUSG00000102097	A930006L05Rik	-5.501	0.0052	0.037	6	3	7	0	0	0	6	3	6	0	0	0
ENSMUSG00000102727	Gm37938	4.012	0.0023	0.019	0	1	0	5	11	7	0	1	0	5	12	8
ENSMUSG00000106547	B230303O12Rik	1.729	0.0012	0.011	7	9	7	25	31	23	7	9	6	24	35	27
ENSMUSG00000106988	Tsg101-ps	-2.256	0.0015	0.014	19	14	17	3	4	3	18	14	14	3	4	4
ENSMUSG00000016356	Col20a1	1.338	0.0061	0.042	13	13	24	59	34	32	12	13	20	56	39	38
ENSMUSG00000023918	Adgrf4	-1.025	0.0013	0.012	145	254	273	71	141	118	138	259	223	67	159	139
ENSMUSG00000031266	Gla	-1.085	0.0053	0.037	134	129	73	32	48	79	128	131	59	30	54	92
ENSMUSG00000034555	Tex16	-1.836	0.0025	0.02	29	15	26	5	7	7	28	15	21	5	8	8
ENSMUSG00000037172	E330009J07Rik	-1.026	0.0061	0.042	52	106	89	31	45	45	49	108	73	29	51	53
ENSMUSG00000040640	Erc2	1.638	0.0012	0.012	10	20	22	78	28	54	9	20	18	74	32	63
ENSMUSG00000043889	Gm8399	-2.431	0.0053	0.037	21	9	12	4	2	2	20	9	10	4	2	2
ENSMUSG00000054855	Rnd1	-2.353	0.0073	0.048	9	16	23	0	4	4	8	16	19	0	5	5
ENSMUSG00000055817	Mta3	-1.121	0.0024	0.02	214	123	220	41	103	112	204	125	180	39	116	131
ENSMUSG00000065265	Gm23455	-1.325	0.0022	0.018	33	46	45	20	16	13	31	47	37	19	18	16
ENSMUSG00000069899	Gm12166	-1.939	0.0042	0.031	19	21	20	9	3	3	18	21	16	9	3	4
ENSMUSG00000080921	Rpl38-ps2	1.265	0.0016	0.014	75	38	38	70	162	134	72	39	31	66	183	158
ENSMUSG00000096563	Gm24095	2.048	0.0025	0.02	2	8	4	22	16	20	2	8	3	21	18	24
ENSMUSG00000097085	Gm26634	2.314	0.0027	0.022	1	7	5	19	10	36	1	7	4	18	12	42
ENSMUSG00000104576	F830115B05Rik	2.296	1.5e-06	4.2e-05	20	18	18	155	69	52	19	18	15	147	79	62
ENSMUSG00000105586	Gm43009	2.103	0.0064	0.043	5	1	13	14	45	25	5	1	11	13	50	30
ENSMUSG00000107369	Gstm2-ps1	-2.923	0.0056	0.039	13	9	10	3	0	1	12	9	8	3	0	1
ENSMUSG00000029607	Ankrd61	-1.428	0.0041	0.03	28	32	54	10	13	20	27	33	45	9	15	23
ENSMUSG00000034493	4930556J24Rik	-2.608	0.0055	0.038	13	14	10	3	3	0	12	14	8	3	3	0
ENSMUSG00000037138	Aff3	2.041	0.0028	0.022	6	5	5	35	23	10	6	5	4	33	26	12
ENSMUSG00000041073	Nacad	1.429	0.0063	0.043	20	12	8	22	46	38	19	12	6	21	52	45
ENSMUSG00000055720	Ubl7	-1.163	3.2e-05	0.00057	636	328	358	261	152	178	605	334	292	247	172	210
ENSMUSG00000056073	Grik2	3.826	0.00026	0.0033	0	0	5	44	13	12	0	0	4	42	15	14
ENSMUSG00000060512	0610040J01Rik	-2.48	0.0026	0.021	18	31	8	1	4	4	17	32	6	1	5	5
ENSMUSG00000064345	mt-Nd2	-1.209	1.3e-05	0.00026	26898	15136	13709	11737	6229	6156	25593	15412	11199	11119	7059	7245
ENSMUSG00000064366	mt-Tl2	3.399	0.0042	0.031	1	0	1	15	3	8	1	0	1	14	4	10
ENSMUSG00000080885	Rpl10-ps6	1.706	0.0026	0.021	9	6	7	19	31	25	9	6	6	18	35	29
ENSMUSG00000084159	Gm12696	-2.246	0.005	0.035	30	11	14	5	5	1	29	11	11	5	6	1
ENSMUSG00000086916	Gm15903	1.481	0.0064	0.043	6	17	13	40	42	21	6	17	11	38	47	25
ENSMUSG00000089045	Gm26169	5.726	0.0044	0.032	0	0	0	5	13	1	0	0	0	5	14	2
ENSMUSG00000089702	Gm16568	-2.455	0.005	0.035	24	22	5	1	3	5	23	22	4	1	3	6
ENSMUSG00000097854	Gm26602	-2.043	0.0054	0.038	27	13	17	3	2	9	26	13	14	3	2	10
ENSMUSG00000105107	Gm43412	1.532	0.0018	0.015	11	15	8	34	31	31	10	15	6	32	35	37
ENSMUSG00000105528	Gm43519	-1.859	5.7e-05	0.00092	252	129	95	33	74	24	240	131	77	31	83	29
ENSMUSG00000107780	RP23-341J13.3	1.826	0.005	0.035	8	7	4	14	37	19	8	7	3	13	41	22
ENSMUSG00000000792	Slc5a5	2.552	0.0044	0.032	2	0	15	59	26	18	2	0	13	56	30	22
ENSMUSG00000024338	Psmb8	1.226	0.0045	0.033	13	28	20	46	39	55	12	28	16	44	44	65
ENSMUSG00000026829	Gbgt1	5.496	0.0061	0.042	0	0	0	5	2	10	0	0	0	5	2	11
ENSMUSG00000027919	Lce1g	-2.087	0.0002	0.0026	182	78	275	45	70	10	173	80	226	43	79	13
ENSMUSG00000029348	Asphd2	1.474	0.0018	0.016	14	14	9	41	30	30	13	14	7	39	34	36
ENSMUSG00000030093	Wnt7a	5.647	0.0073	0.048	0	0	0	6	1	11	0	0	0	6	1	13
ENSMUSG00000035845	Alg12	-1.055	0.0055	0.038	72	61	50	31	21	37	69	62	41	29	24	43
ENSMUSG00000035933	Cog5	-1.004	0.0017	0.015	209	151	97	81	69	78	199	154	79	77	78	92
ENSMUSG00000035954	Dock4	-1.592	0.0023	0.019	28	37	65	7	17	19	27	38	54	7	19	22
ENSMUSG00000038508	Gdf15	-1.08	3.4e-05	0.00059	594	400	274	173	211	215	565	407	223	164	239	253
ENSMUSG00000039529	Atp8b1	2.943	0.0012	0.011	3	1	5	34	4	33	3	1	4	32	5	38
ENSMUSG00000041351	Rap1gap	1.101	0.0067	0.045	41	25	19	69	66	46	39	25	15	65	75	55
ENSMUSG00000062683	Atp5g2	-1.045	0.0015	0.014	215	124	119	83	54	85	205	126	97	79	61	100
ENSMUSG00000081251	Gm12164	-2.739	0.0057	0.039	9	12	12	3	0	2	9	12	10	3	0	2
ENSMUSG00000085642	3110053B16Rik	-1.448	0.0074	0.048	22	34	44	16	15	6	21	35	36	15	17	7
ENSMUSG00000085695	Gm15243	-3.989	0.0066	0.044	8	8	4	0	1	0	8	8	3	0	1	0
ENSMUSG00000090117	Gm16541	-2.435	0.0018	0.016	13	12	17	2	3	3	12	12	14	2	3	3
ENSMUSG00000092190	Gm20470	-1.474	0.0027	0.022	32	32	34	12	16	7	30	33	28	11	18	9
ENSMUSG00000098030	Gm6771	-2.249	0.0032	0.025	20	10	16	4	3	3	19	10	13	4	3	3
ENSMUSG00000098886	Mir6385	1.345	0.0039	0.029	10	24	15	47	33	42	9	24	12	45	38	49
ENSMUSG00000098967	Gm27845	-1.578	0.0058	0.04	16	33	38	13	7	9	15	34	31	12	8	11
ENSMUSG00000100865	Gm9320	1.875	0.0022	0.018	8	5	4	17	23	24	8	5	3	16	26	28
ENSMUSG00000102193	Gm7299	1.979	0.0062	0.042	9	4	1	17	28	15	9	4	1	16	31	18
ENSMUSG00000106734	Gm20559	-2.499	0.0063	0.042	19	11	9	2	5	0	18	11	7	2	5	0
ENSMUSG00000005986	Ankrd13d	1.226	0.0045	0.032	16	28	18	64	44	37	15	28	15	61	50	44
ENSMUSG00000029641	Rasl11a	-1.385	0.00037	0.0043	205	158	72	66	43	57	195	161	58	63	49	67
ENSMUSG00000031385	Plxnb3	-1.928	0.0031	0.024	21	13	27	4	7	4	20	13	22	4	8	5
ENSMUSG00000033510	Otud7a	1.409	0.0037	0.028	11	22	9	34	37	39	10	22	7	32	42	46
ENSMUSG00000041445	Mmrn2	-5.39	0.006	0.041	5	4	6	0	0	0	5	4	5	0	0	0
ENSMUSG00000043029	Trpv3	2.116	0.0069	0.045	5	1	5	11	13	25	5	1	4	10	15	29
ENSMUSG00000045694	Gm4997	1.816	0.0024	0.02	5	6	7	23	25	18	5	6	6	22	28	21
ENSMUSG00000054034	Tceal5	1.227	0.003	0.023	106	46	35	186	155	97	101	47	28	176	176	115
ENSMUSG00000064918	Gm22571	-5.369	0.0059	0.04	4	6	5	0	0	0	4	6	4	0	0	0
ENSMUSG00000073489	Ifi204	-1.089	0.004	0.029	53	60	59	26	35	19	50	61	48	25	39	23
ENSMUSG00000081968	Rpl23a-ps2	2.407	0.0023	0.019	2	3	2	14	16	12	2	3	2	13	18	14
ENSMUSG00000083477	Gm5555	-3.431	0.0042	0.031	7	8	9	1	1	0	7	8	7	1	1	0
ENSMUSG00000089901	Gm8113	-1.476	0.0044	0.032	68	110	151	10	50	59	65	112	124	9	56	69
ENSMUSG00000097267	1700109K24Rik	-1.122	0.0026	0.021	59	51	50	29	23	21	56	52	41	28	26	25
ENSMUSG00000097633	Gm16617	1.624	0.00055	0.006	21	20	31	38	115	70	20	20	26	36	130	82
ENSMUSG00000100081	Gm29434	-3.186	0.003	0.024	6	7	14	0	1	2	6	7	12	0	1	2
ENSMUSG00000106678	Gm43457	1.882	0.003	0.024	5	4	7	23	17	21	5	4	6	22	19	25
ENSMUSG00000106889	Gm7463	-5.369	0.0058	0.04	4	6	5	0	0	0	4	6	4	0	0	0
ENSMUSG00000026170	Cyp27a1	1.342	0.0042	0.031	8	18	18	41	36	36	8	18	15	39	41	42
ENSMUSG00000029554	Mad1l1	-1.011	0.0013	0.012	196	101	210	87	74	91	187	103	172	82	84	107
ENSMUSG00000030424	Zfp939	1.393	0.0014	0.013	41	27	20	112	71	48	39	27	16	106	80	57
ENSMUSG00000052154	Gm9870	-2.075	0.0018	0.016	46	42	11	8	10	5	44	43	8	8	11	6
ENSMUSG00000056481	Cd248	3.929	0.0035	0.027	0	1	0	8	9	4	0	1	0	8	10	5
ENSMUSG00000058966	Fam57b	-1.344	1.1e-05	0.00022	449	225	209	134	105	109	427	229	170	127	119	128
ENSMUSG00000071658	Gng3	-3.972	0.0069	0.046	5	5	10	0	1	0	5	5	8	0	1	0
ENSMUSG00000083567	Gm11451	-1.172	0.0013	0.012	197	99	111	82	53	46	188	101	90	78	60	54
ENSMUSG00000097675	1700101I11Rik	-1.899	0.0025	0.02	50	29	17	5	14	6	48	30	13	5	16	7
ENSMUSG00000031504	Rab20	-2.188	0.0045	0.032	12	16	19	1	5	3	11	16	16	1	6	4
ENSMUSG00000042087	4933440N22Rik	1.162	0.0027	0.022	22	21	23	57	50	41	21	21	19	54	57	48
ENSMUSG00000055968	Gm9988	-5.825	0.0047	0.034	14	1	6	0	0	0	13	1	5	0	0	0
ENSMUSG00000062588	Gm6104	-3.897	0.0074	0.048	5	8	6	1	0	0	5	8	5	1	0	0
ENSMUSG00000085111	Ascl4	-1.37	0.0024	0.02	42	31	32	14	13	14	40	32	26	13	15	16
ENSMUSG00000091971	Hspa1a	2.419	6e-06	0.00014	15	15	28	45	82	181	14	15	23	42	93	212
ENSMUSG00000105400	SCARNA4	2.774	0.0032	0.025	1	2	1	5	13	13	1	2	1	5	15	15
ENSMUSG00000013338	Fer1l4	1.02	0.0053	0.037	23	27	36	57	59	60	22	28	30	54	67	71
ENSMUSG00000028141	Oaz3	1.271	0.0044	0.032	20	18	15	54	45	29	19	18	12	51	51	34
ENSMUSG00000028584	Lrrc38	1.936	0.0071	0.047	4	10	3	19	35	12	4	10	2	18	39	14
ENSMUSG00000030606	Hapln3	3.899	0.0057	0.039	0	1	0	12	5	4	0	1	0	11	6	5
ENSMUSG00000030827	Fgf21	-1.918	2e-06	5.3e-05	579	268	193	133	90	52	551	273	157	126	102	62
ENSMUSG00000033498	Strc	2.722	0.0034	0.026	0	6	5	35	5	33	0	6	4	33	6	39
ENSMUSG00000064797	Gm24357	-3.137	0.0072	0.047	10	4	12	0	0	3	10	4	10	0	0	3
ENSMUSG00000070891	Gm12689	1.472	0.0036	0.027	8	9	14	30	25	33	8	9	12	28	29	39
ENSMUSG00000081648	Gm13423	1.35	0.0055	0.038	15	22	9	52	36	29	14	22	7	49	41	34
ENSMUSG00000084788	Gm11342	3.855	0.0064	0.043	0	0	1	12	6	3	0	0	1	11	7	4
ENSMUSG00000106416	Gm5857	1.202	0.0046	0.033	40	36	21	76	104	45	38	37	17	72	118	53
ENSMUSG00000005107	Slc2a9	1.338	0.0067	0.044	17	9	15	28	33	42	16	9	12	26	37	49
ENSMUSG00000024526	Cidea	1.813	5.8e-06	0.00013	44	57	36	258	132	92	42	58	29	245	150	109
ENSMUSG00000026893	Gca	1.09	0.0066	0.044	16	28	30	60	45	54	15	29	25	57	51	64
ENSMUSG00000040714	Klc3	-1.271	0.0035	0.027	32	41	47	15	20	14	30	42	39	14	23	17
ENSMUSG00000074178	Gm10638	1.763	0.0031	0.024	4	9	6	27	23	16	4	9	5	26	26	19
ENSMUSG00000074452	Pate2	-1.938	0.003	0.024	17	17	21	5	4	4	16	17	17	5	5	5
ENSMUSG00000083011	Gm12816	1.462	0.0028	0.022	11	12	10	24	28	37	10	12	8	23	32	43
ENSMUSG00000101308	Gm28989	-1.673	0.0069	0.046	26	20	29	2	10	11	25	20	24	2	11	13
ENSMUSG00000107990	RP23-326P16.4	-1.048	0.0042	0.031	69	49	56	24	31	29	66	50	46	23	35	34
ENSMUSG00000000555	Itga5	-1.027	0.0028	0.022	434	415	227	286	108	135	413	423	185	271	123	159
ENSMUSG00000021822	Plau	-1.164	0.0028	0.023	57	92	130	55	34	36	54	94	107	52	39	42
ENSMUSG00000027208	Fgf7	-1.021	0.0066	0.044	47	62	80	25	32	36	45	63	66	24	36	42
ENSMUSG00000042476	Abcb4	2.404	0.006	0.041	0	4	8	38	12	16	0	4	7	36	14	19
ENSMUSG00000050640	Tmem150c	2.287	0.0043	0.031	1	6	1	15	17	11	1	6	1	14	19	13
ENSMUSG00000051439	Cd14	-1.296	0.0057	0.04	32	41	47	9	20	21	30	42	39	8	22	24
ENSMUSG00000078789	Dph1	-2.93	0.0026	0.021	48	14	16	9	1	0	46	14	13	9	1	0
ENSMUSG00000082420	Gm6517	-1.381	0.0034	0.026	39	26	35	11	14	14	37	27	29	10	16	16
ENSMUSG00000084821	Gm15880	3.824	0.005	0.035	1	0	0	5	9	6	1	0	0	5	10	7
ENSMUSG00000087700	Gm15283	-2.016	0.0072	0.047	22	15	10	6	3	2	21	15	8	6	3	3
ENSMUSG00000094626	Cecr6	3.599	0.005	0.035	1	1	0	1	12	16	1	1	0	1	14	19
ENSMUSG00000104002	Gm38336	2.349	0.0069	0.046	3	3	1	14	7	19	3	3	1	13	8	22
ENSMUSG00000108053	RP24-317F6.7	-2.324	0.0055	0.038	19	9	11	3	4	1	18	9	9	3	4	1
ENSMUSG00000004187	Kifc2	1.284	0.0029	0.023	14	18	15	36	34	43	13	18	12	34	39	50
ENSMUSG00000027401	Tgm3	5.379	0.0071	0.047	0	0	0	7	5	2	0	0	0	7	6	3
ENSMUSG00000065750	Gm23346	1.967	0.005	0.035	7	3	3	15	21	15	7	3	2	14	24	18
ENSMUSG00000085178	Kdm6bos	-2.166	0.0065	0.043	16	17	10	2	5	2	15	17	8	2	6	2
ENSMUSG00000102672	Gm37105	1.223	0.0073	0.048	19	18	15	27	51	43	18	18	12	25	58	50
ENSMUSG00000104625	Gm42448	2.061	0.0008	0.0082	9	6	9	56	28	17	9	6	7	53	32	20
ENSMUSG00000108478	RP23-52F4.1	1.886	0.0075	0.048	2	4	8	20	17	17	2	4	7	19	19	20
ENSMUSG00000025537	Phkg1	1.407	0.005	0.035	14	9	11	23	35	31	13	9	9	22	39	37
ENSMUSG00000050966	Lin28a	4.089	0.0061	0.042	1	0	0	15	8	1	1	0	0	14	9	2
ENSMUSG00000056155	Nanos3	1.248	0.0071	0.047	16	14	17	26	48	37	15	14	14	25	54	43
ENSMUSG00000062319	Gm10115	1.713	0.0017	0.015	7	17	19	35	78	30	7	17	16	33	88	36
ENSMUSG00000067941	Gm7168	5.347	0.0052	0.036	0	0	0	5	4	5	0	0	0	5	5	6
ENSMUSG00000081895	Rpl17-ps10	1.446	0.0058	0.04	9	10	12	24	38	24	9	10	10	23	43	28
ENSMUSG00000028341	Nr4a3	1.514	0.0028	0.022	22	21	10	30	79	43	21	21	8	28	89	51
ENSMUSG00000042369	Rbm45	1.133	0.0003	0.0036	90	113	103	316	222	134	86	115	84	300	252	158
ENSMUSG00000044916	1700029I15Rik	1.892	0.0075	0.048	3	5	6	24	9	20	3	5	5	23	10	24
ENSMUSG00000056069	Fam105a	2.179	0.0012	0.012	15	6	4	61	35	16	14	6	3	58	40	19
ENSMUSG00000076136	Gm24951	3.79	0.0052	0.037	1	0	0	8	6	5	1	0	0	8	7	6
ENSMUSG00000098068	Gm7909	1.848	0.0053	0.037	4	8	4	27	18	13	4	8	3	26	20	16
ENSMUSG00000101320	Gm28529	-1.422	0.0073	0.048	42	22	29	7	11	16	40	22	24	7	12	19
ENSMUSG00000107886	RP23-172L21.2	5.551	0.0064	0.043	0	0	0	2	12	3	0	0	0	2	13	4
ENSMUSG00000035184	Fam124a	1.021	0.0048	0.034	23	28	29	50	60	53	22	28	24	47	68	62
ENSMUSG00000057551	Zfp317	-1.197	0.0069	0.046	36	46	45	11	23	21	34	47	37	10	26	25
ENSMUSG00000062515	Fabp4	-2.546	0.0011	0.011	61	39	11	1	5	12	58	40	8	1	6	14
ENSMUSG00000064342	mt-Ti	1.434	1.8e-05	0.00034	77	93	104	383	203	155	73	95	85	363	230	183
ENSMUSG00000088252	Snord13	-1.623	0.0069	0.046	18	24	31	3	11	9	17	24	26	3	12	11
ENSMUSG00000097757	Gm17518	-2.673	0.0056	0.039	8	8	14	0	3	2	8	8	12	0	3	2
ENSMUSG00000033192	Lpcat2	-3.055	0.0012	0.011	39	9	15	0	5	2	37	9	12	0	6	2
ENSMUSG00000037386	Rims2	1.329	0.0036	0.027	19	38	29	38	107	73	18	39	24	36	121	86
ENSMUSG00000067567	Hdac8	-1.144	0.0061	0.041	101	53	52	27	42	24	96	54	42	26	47	28
ENSMUSG00000058809	Hspd1-ps3	-1.679	0.0048	0.034	19	22	22	5	9	5	18	22	18	5	10	6
ENSMUSG00000062785	Kcnc3	1.536	0.0071	0.047	4	9	12	28	19	26	4	9	10	27	22	30
ENSMUSG00000087153	Gm6483	-1.258	0.0045	0.032	35	33	40	14	18	14	33	34	33	13	20	16
ENSMUSG00000032369	Plscr1	-1.245	0.0037	0.028	37	105	82	27	34	32	35	107	67	26	39	38
ENSMUSG00000036067	Slc2a6	1.396	0.002	0.017	23	34	33	113	89	37	22	35	27	107	101	44
ENSMUSG00000096795	Zfp433	-1.723	0.0048	0.034	19	17	23	6	4	7	18	17	19	6	5	8
ENSMUSG00000101564	Gm5703	3.686	0.0069	0.046	0	0	1	7	6	5	0	0	1	7	7	6
ENSMUSG00000108573	RP24-399H16.1	-1.349	0.0061	0.042	28	28	39	9	16	13	27	29	32	8	18	15
ENSMUSG00000027580	Helz2	-1.197	0.0076	0.049	32	36	44	21	15	13	30	37	36	20	17	15
ENSMUSG00000038591	Colec10	-2.148	0.0029	0.023	79	25	32	22	4	4	75	25	26	21	5	5
ENSMUSG00000071540	3425401B19Rik	1.106	0.00044	0.005	196	142	101	430	328	189	187	145	82	408	372	223
ENSMUSG00000107286	Gm43788	1.966	0.0061	0.042	5	12	4	9	34	41	5	12	3	8	38	48
ENSMUSG00000003200	Sh3gl1	-1.021	9.3e-05	0.0014	696	407	320	224	209	268	662	414	261	212	237	315
ENSMUSG00000035390	Brsk1	1.741	0.0027	0.022	13	8	11	58	19	29	12	8	9	55	22	34
ENSMUSG00000081552	Gm12328	-1.437	0.0056	0.039	27	22	29	11	7	11	26	22	24	10	8	13
ENSMUSG00000086472	Gm16172	-3.448	0.0053	0.037	20	2	11	0	0	3	19	2	9	0	0	3
ENSMUSG00000027887	Sypl2	1.637	1.8e-05	0.00035	52	75	94	374	173	138	49	76	77	355	196	163
ENSMUSG00000039179	Tekt5	-1.373	0.0011	0.011	134	54	65	39	29	30	128	55	53	37	33	35
ENSMUSG00000030752	Kdm8	-1.442	0.0034	0.026	27	36	70	18	17	14	26	37	58	17	19	17
ENSMUSG00000040181	Fmo1	1.178	0.004	0.03	36	29	55	136	67	69	34	30	45	129	76	81
ENSMUSG00000046794	Ppp1r3b	-1.787	0.0066	0.044	18	13	21	3	5	6	17	13	17	3	6	7
ENSMUSG00000092680	Snord55	-6.3	0.001	0.0099	22	2	5	0	0	0	21	2	4	0	0	0
ENSMUSG00000097068	Gm26760	-2.955	0.0014	0.013	39	16	7	4	3	1	37	16	5	4	3	1
ENSMUSG00000009378	Slc16a12	1.583	0.0077	0.049	8	6	6	22	22	18	8	6	5	21	25	21
ENSMUSG00000037868	Egr2	1.339	0.0058	0.04	23	85	29	108	72	166	22	86	23	102	82	195
ENSMUSG00000083500	Gm15470	-2.902	0.0063	0.043	5	9	9	0	1	2	5	9	7	0	1	2
ENSMUSG00000041658	Rragb	-1.292	0.0069	0.046	30	30	27	11	10	15	29	31	22	10	11	18
ENSMUSG00000101586	Gm29017	-4.28	0.0051	0.036	18	5	3	1	0	0	17	5	2	1	0	0
ENSMUSG00000045636	Mtus1	1.401	0.0045	0.032	17	62	24	136	68	68	16	63	19	129	77	80
ENSMUSG00000029120	Ppp2r2c	2.15	0.0016	0.014	9	6	5	54	25	13	9	6	4	51	28	16
ENSMUSG00000054178	Gm9938	-2.337	0.0046	0.033	6	36	51	11	5	1	6	37	42	11	6	2
ENSMUSG00000034714	Ttyh2	1.393	1.5e-06	4.2e-05	264	232	228	1018	474	410	251	236	186	965	537	483
ENSMUSG00000017697	Ada	-1.648	0.0057	0.039	23	19	49	5	10	14	22	19	41	5	11	16
ENSMUSG00000108658	RP24-74B24.4	1.737	0.0059	0.04	5	9	11	47	16	21	5	9	9	45	18	25
ENSMUSG00000022510	Trp63	1.64	0.00052	0.0058	21	37	23	140	72	44	20	38	19	133	82	52
ENSMUSG00000063529	Stmnd1	-1.387	0.0066	0.044	76	36	29	22	12	20	73	37	23	21	14	23
ENSMUSG00000064347	mt-Ta	1.055	0.00012	0.0017	188	179	206	594	335	261	179	182	168	563	380	308
ENSMUSG00000046618	Olfml2a	3.783	0.00048	0.0053	0	4	0	43	10	8	0	4	0	41	12	10
ENSMUSG00000009628	Tex15	-2.92	0.0012	0.011	10	11	37	2	1	4	9	11	31	2	1	5
ENSMUSG00000035202	Lars2	-1.399	0.00051	0.0056	29373	15002	10115	12243	4135	4282	27948	15275	8263	11599	4687	5040
ENSMUSG00000106791	4930553P18Rik	6.39	0.0009	0.009	0	0	0	24	2	5	0	0	0	23	2	6
ENSMUSG00000108200	RP24-238C11.5	3.429	0.00018	0.0024	2	3	2	58	20	6	2	3	2	55	23	8
ENSMUSG00000085636	Gm11769	-3.979	0.0038	0.028	3	7	24	0	2	0	3	7	20	0	2	0
ENSMUSG00000105382	Gm43339	-3.218	0.0034	0.026	9	7	32	4	0	1	8	7	27	4	0	1
ENSMUSG00000086324	Gm15564	-1.486	0.00035	0.0041	10862	5207	3356	4077	1448	1410	10335	5302	2741	3863	1642	1660
ENSMUSG00000044349	Snhg11	3.114	0.0012	0.011	1	3	22	11	163	62	1	3	19	10	183	73
ENSMUSG00000074486	Bglap2	-2.861	5.6e-06	0.00013	173	53	29	11	10	15	165	54	23	10	11	17
ENSMUSG00000018566	Slc2a4	1.389	0.0002	0.0026	124	78	71	389	183	143	118	79	58	369	208	169
ENSMUSG00000044017	Adgrd1	1.62	0.0042	0.031	8	16	15	68	29	23	8	16	12	65	33	27
ENSMUSG00000052102	Gnpda1	-1.157	0.0061	0.042	168	80	70	68	34	40	160	81	57	65	39	47
ENSMUSG00000018634	Crhr1	6.354	0.0012	0.012	0	0	0	24	4	1	0	0	0	23	5	2
ENSMUSG00000103001	A930005N03Rik	-1.832	0.0051	0.036	57	31	11	7	9	11	54	32	8	7	10	13
ENSMUSG00000038085	Cnbd2	-1.557	0.00086	0.0086	447	291	80	124	83	70	426	296	64	118	94	83
ENSMUSG00000021213	Akr1c13	-2.188	0.00084	0.0085	14	46	89	6	15	11	13	47	74	6	17	13
ENSMUSG00000027316	Gfra4	1.473	0.0025	0.021	28	24	16	106	47	37	27	24	13	101	53	44
ENSMUSG00000032652	Crebl2	2.457	2.3e-05	0.00043	14	20	16	178	36	58	13	20	13	169	41	69
ENSMUSG00000006134	Crkl	-1.452	0.0046	0.033	152	57	68	18	24	59	145	58	55	17	27	69
ENSMUSG00000023861	Mpc1	-1.078	0.0013	0.012	562	246	258	238	129	138	535	251	210	226	146	163
ENSMUSG00000057606	Colq	1.518	0.0066	0.044	24	35	10	104	70	27	23	36	8	99	79	32
ENSMUSG00000002032	Tmem25	1.582	0.0043	0.031	10	19	26	95	40	29	9	19	22	90	46	35
ENSMUSG00000026778	Prkcq	1.21	0.0033	0.026	63	50	32	177	93	67	60	51	26	168	106	79
ENSMUSG00000097274	Gm26564	-3.074	0.0074	0.048	6	38	10	0	0	6	6	39	8	0	0	7
ENSMUSG00000055489	Ano5	1.385	6.6e-06	0.00015	1229	1546	1086	5595	2643	1844	1169	1574	887	5301	2995	2171
ENSMUSG00000095742	CAAA01147332.1	-2.287	0.0015	0.014	60	20	12	5	6	7	57	20	9	5	7	8
ENSMUSG00000031980	Agt	4.537	0.0025	0.021	0	1	0	25	2	6	0	1	0	24	2	7
ENSMUSG00000087530	Gm15533	-3.549	0.002	0.017	35	5	7	1	1	2	34	5	5	1	1	2
ENSMUSG00000064344	mt-Tm	1.064	0.0017	0.015	108	119	134	408	203	146	103	121	110	387	230	172
ENSMUSG00000087382	Ctcflos	2.547	0.0065	0.044	1	3	5	37	9	7	1	3	4	35	10	9
ENSMUSG00000076258	Gm23935	-1.672	0.0034	0.026	12720	5223	2200	4340	1021	960	12103	5318	1796	4112	1158	1131
ENSMUSG00000042895	Abra	1.285	0.0054	0.037	49	30	36	162	49	70	47	31	29	154	56	83
ENSMUSG00000053279	Aldh1a1	3.165	0.00029	0.0036	3	5	4	83	9	16	3	5	3	79	11	19
ENSMUSG00000074500	Zfp558	2.063	0.0073	0.047	10	6	4	57	8	21	10	6	3	54	9	25
ENSMUSG00000034220	Gpc1	1.047	0.00047	0.0052	3493	3068	2313	10109	4652	3584	3324	3124	1889	9577	5272	4218
ENSMUSG00000046676	Lce1l	-7.034	0.0033	0.026	48	0	0	0	0	0	46	0	0	0	0	0
ENSMUSG00000020401	Fam71b	2.913	0.004	0.029	2	1	6	7	8	57	2	1	5	6	9	65
ENSMUSG00000065037	Rn7sk	1.65	0.0041	0.03	24	23	27	48	28	157	23	23	22	45	32	183

## Sheet: list DEG in mf(significant)
List of differentially expressed genes between WT and REST-cKO single myofibers (Only significant: absolute log2FC >1, p-adj<0.05)
id	gene_symbol	log_FC	edger.p.value	edger.adj.p.value	WT1_2_myob_REST_RNASeq.norm	WT2_2_myob_REST_RNASeq.norm	WT3_2_myob_REST_RNASeq.norm	KO1_2_myob_REST_RNASeq.norm	KO2_2_myob_REST_RNASeq.norm	KO3_2_myob_REST_RNASeq.norm	WT1_2_myob_REST_RNASeq.raw	WT2_2_myob_REST_RNASeq.raw	WT3_2_myob_REST_RNASeq.raw	KO1_2_myob_REST_RNASeq.raw	KO2_2_myob_REST_RNASeq.raw	KO3_2_myob_REST_RNASeq.raw
ENSMUSG00000006575	Rundc3a	11.199	3.7e-54	6.5e-50	1	0	0	931	1095	1062	1	0	0	829	1275	897	0.106872
ENSMUSG00000027273	Snap25	9.663	2.5e-52	2.2e-48	5	4	1	2157	2067	3695	4	5	1	1921	2406	3122	0.427486
ENSMUSG00000029054	Gabrd	6.441	1.5e-36	8.5e-33	52	64	31	3989	2983	5764	40	87	33	3553	3473	4870	4.27486
ENSMUSG00000021194	Chga	8.03	2.1e-28	9e-25	1	2	0	258	510	286	1	3	0	230	594	242	0.106872
ENSMUSG00000062444	Ap3b2	7.693	3.8e-27	1.3e-23	2	1	0	308	268	279	2	2	0	274	312	236	0.213743
ENSMUSG00000033676	Gabrb3	8.063	2.2e-23	6.3e-20	2	0	1	153	412	311	2	0	1	136	480	263	0.213743
ENSMUSG00000042873	Lhfpl4	8.543	1.2e-19	3.1e-16	1	0	0	165	152	178	1	0	0	147	177	150	0.106872
ENSMUSG00000030350	Prmt8	8.491	1.6e-18	3.5e-15	0	1	0	148	174	139	0	1	0	132	202	117	0
ENSMUSG00000022054	Nefm	6.928	1.5e-16	2.9e-13	0	4	0	127	284	166	0	5	0	113	330	140	0
ENSMUSG00000039860	Srrm3	7.026	2.5e-16	4.4e-13	0	0	4	217	115	206	0	0	4	193	134	174	0
ENSMUSG00000075602	Ly6a	-7.175	6.2e-16	9.8e-13	426	585	128	8	0	0	330	800	138	7	0	0	35.2676
ENSMUSG00000055567	Unc80	5.055	1.3e-15	1.8e-12	10	4	8	230	162	336	8	5	9	205	189	284	0.854973
ENSMUSG00000071719	Tmem28	7.134	8.4e-15	1.1e-11	4	0	0	110	153	212	3	0	0	98	178	179	0.320615
ENSMUSG00000079018	Ly6c1	-9.05	1.5e-14	1.9e-11	142	1080	95	2	0	0	110	1475	102	2	0	0	11.7559
ENSMUSG00000042763	Maneal	4.545	2.2e-14	2.5e-11	10	16	4	249	227	246	8	22	4	222	264	208	0.854973
ENSMUSG00000026193	Fn1	-7.156	1.3e-13	1.4e-10	383	206	71	4	0	0	297	281	77	4	0	0	31.7409
ENSMUSG00000058064	Gm10036	5.987	1.4e-13	1.4e-10	4	1	2	137	125	134	3	1	2	122	145	113	0.320615
ENSMUSG00000032181	Scg3	6.141	3.9e-13	3.7e-10	0	5	0	182	113	153	0	7	0	162	132	129	0
ENSMUSG00000017943	Gdap1l1	6.066	4.1e-13	3.8e-10	0	0	14	243	398	329	0	0	15	216	463	278	0
ENSMUSG00000020591	Ntsr2	4.118	5e-13	4.3e-10	13	18	9	153	294	269	10	25	10	136	342	227	1.06872
ENSMUSG00000033316	Galnt9	6.937	1e-11	8.6e-09	0	2	0	90	96	77	0	2	0	80	112	65	0
ENSMUSG00000051146	Camk2n2	5.044	1.5e-11	1.2e-08	1	2	20	283	233	264	1	3	21	252	271	223	0.106872
ENSMUSG00000040722	Scamp5	5.018	2.3e-11	1.7e-08	11	0	6	195	188	172	9	0	7	174	219	145	0.961844
ENSMUSG00000042532	Golga7b	4.158	3.8e-11	2.8e-08	16	103	152	1389	1778	1696	12	141	164	1237	2070	1433	1.28246
ENSMUSG00000022619	Mapk8ip2	5.257	5.5e-11	3.9e-08	1	1	20	253	261	329	1	1	21	225	304	278	0.106872
ENSMUSG00000021388	Aspn	-8.483	6.2e-11	4.1e-08	323	169	17	1	0	0	250	231	18	1	0	0	26.7179
ENSMUSG00000048978	Nrsn1	6.465	7.9e-11	5.1e-08	0	2	1	84	58	128	0	2	1	75	68	108	0
ENSMUSG00000022579	Gpihbp1	-10.801	3.1e-10	1.9e-07	22	593	41	0	0	0	17	809	44	0	0	0	1.81682
ENSMUSG00000102252	Snrpn	2.56	1.4e-09	8.7e-07	568	629	1022	4289	5910	2889	440	860	1102	3820	6880	2441	47.0235
ENSMUSG00000019796	Lrp11	4.815	1.6e-09	9.2e-07	87	3	31	875	724	1798	68	5	33	779	843	1519	7.26727
ENSMUSG00000038916	Soga3	6.683	2e-09	1.1e-06	2	0	0	66	81	97	2	0	0	59	94	82	0.213743
ENSMUSG00000041460	Cacna2d4	2.967	7e-09	3.8e-06	31	30	27	149	247	292	24	41	29	133	288	247	2.56492
ENSMUSG00000046058	Eid2	3.063	1.1e-08	5.8e-06	16	32	27	247	150	231	12	43	29	220	175	195	1.28246
ENSMUSG00000030701	Plekhb1	-2.332	1.6e-08	8.4e-06	359	452	531	84	112	70	278	618	573	75	130	59	29.7103
ENSMUSG00000018593	Sparc	-2.619	2.5e-08	1.2e-05	1533	1094	751	267	191	91	1187	1495	810	238	222	77	126.857
ENSMUSG00000066705	Fxyd6	-5.43	2.8e-08	1.4e-05	164	60	60	4	2	0	127	82	65	4	2	0	13.5727
ENSMUSG00000058914	C1qtnf3	-6.908	3.5e-08	1.7e-05	170	17	94	0	2	0	132	23	101	0	2	0	14.107
ENSMUSG00000023046	Igfbp6	-5.548	5.8e-08	2.7e-05	253	72	56	1	0	7	196	99	60	1	0	6	20.9468
ENSMUSG00000049775	Tmsb4x	-3.002	1.1e-07	5e-05	608	2594	620	135	146	196	471	3545	669	120	170	166	50.3365
ENSMUSG00000023033	Scn8a	4.61	1.4e-07	6.2e-05	4	2	3	72	75	72	3	3	3	64	87	61	0.320615
ENSMUSG00000062515	Fabp4	-8.875	1.5e-07	6.3e-05	8	2176	65	2	0	2	6	2973	70	2	0	2	0.641229
ENSMUSG00000037843	Vstm2l	8.619	2.5e-07	0.0001	0	0	0	33	23	89	0	0	0	29	27	75	0
ENSMUSG00000049265	Kcnk3	5.516	2.6e-07	0.00011	0	0	5	107	70	56	0	0	5	95	81	47	0
ENSMUSG00000001334	Fndc5	3.002	3.2e-07	0.00013	57	17	40	292	144	472	44	24	43	260	168	399	4.70235
ENSMUSG00000031144	Syp	4.915	3.7e-07	0.00014	17	1	0	191	198	143	14	1	0	170	231	121	1.4962
ENSMUSG00000033615	Cplx1	4.931	3.9e-07	0.00015	0	3	3	72	55	72	0	4	3	64	64	61	0
ENSMUSG00000019997	Ctgf	-3.845	4.2e-07	0.00016	942	132	148	19	47	18	730	181	160	17	55	15	78.0162
ENSMUSG00000021198	Unc79	5.257	5.1e-07	0.00019	3	2	0	42	70	80	2	3	0	37	82	68	0.213743
ENSMUSG00000045903	Npas4	9.065	5.7e-07	0.0002	0	0	0	27	10	159	0	0	0	24	12	135	0
ENSMUSG00000044349	Snhg11	7.827	7.1e-07	0.00025	16	1	0	3368	29	483	13	1	0	3000	34	408	1.38933
ENSMUSG00000027350	Chgb	4.901	7.9e-07	0.00027	0	8	0	98	88	91	0	11	0	87	103	77	0
ENSMUSG00000069814	E130309D14Rik	6.576	8.7e-07	0.00029	1	0	0	35	53	41	1	0	0	31	62	35	0.106872
ENSMUSG00000022587	Ly6e	-3.977	9.4e-07	0.00031	213	1439	251	85	15	20	165	1966	271	76	18	17	17.6338
ENSMUSG00000107219	Gm42738	6.019	9.7e-07	0.00031	1	1	0	70	47	30	1	1	0	62	55	25	0.106872
ENSMUSG00000015829	Tnr	4.602	1.1e-06	0.00034	5	0	5	67	92	72	4	0	5	60	107	61	0.427486
ENSMUSG00000026879	Gsn	-3.034	1.5e-06	0.00046	866	549	153	104	29	58	671	751	165	93	34	49	71.7108
ENSMUSG00000036046	5031439G07Rik	1.801	1.7e-06	0.00051	398	490	425	1744	1104	1730	308	670	458	1553	1285	1462	32.9164
ENSMUSG00000030116	Mfap5	-6.226	1.8e-06	0.00054	1960	103	162	27	2	0	1518	141	175	24	3	0	162.231
ENSMUSG00000020821	Kif1c	-2.632	2.5e-06	0.00074	1438	808	520	110	63	273	1114	1105	561	98	74	231	119.055
ENSMUSG00000032101	Ddx25	4.792	2.7e-06	0.0008	0	9	0	73	118	86	0	12	0	65	137	73	0
ENSMUSG00000048330	Ric3	3.756	3e-06	0.00087	32	1	8	127	202	222	25	2	9	113	235	188	2.67179
ENSMUSG00000040164	Kcns1	4.211	3.9e-06	0.0011	6	2	4	71	121	34	5	3	4	63	141	29	0.534358
ENSMUSG00000024810	Il33	-9.619	4.2e-06	0.0012	207	81	0	0	0	0	161	111	0	0	0	0	17.2063
ENSMUSG00000035521	Gnptg	1.969	4.6e-06	0.0012	93	104	57	303	382	308	72	142	61	270	445	260	7.69475
ENSMUSG00000028382	Ptbp3	-3.991	5e-06	0.0013	132	89	70	9	9	0	102	122	75	8	10	0	10.9009
ENSMUSG00000006373	Pgrmc1	-3.243	5e-06	0.0013	75	80	108	8	11	8	58	109	117	7	13	7	6.19855
ENSMUSG00000069662	Marcks	-2.84	5.3e-06	0.0014	671	341	96	72	41	41	520	466	104	64	48	35	55.5732
ENSMUSG00000032589	Bsn	4.305	5.5e-06	0.0014	21	2	0	155	167	135	17	3	0	138	194	114	1.81682
ENSMUSG00000025237	Parp6	1.946	5.7e-06	0.0014	225	550	437	1683	1902	1090	174	752	471	1499	2214	921	18.5957
ENSMUSG00000050953	Gja1	-6.39	5.9e-06	0.0015	36	164	9	2	0	0	28	224	10	2	0	0	2.9924
ENSMUSG00000026603	Smyd2	-1.917	6.9e-06	0.0017	1569	2067	1791	548	650	238	1215	2825	1932	488	757	201	129.849
ENSMUSG00000069227	Gprin1	8.241	7.1e-06	0.0017	0	0	0	8	44	59	0	0	0	7	51	50	0
ENSMUSG00000047446	Arl4a	-1.777	7.6e-06	0.0018	452	689	533	162	205	121	350	941	575	144	239	102	37.4051
ENSMUSG00000016494	Cd34	-2.955	8.1e-06	0.0019	307	329	119	27	9	61	238	450	128	24	11	52	25.4354
ENSMUSG00000026678	Rgs5	-5.936	8.3e-06	0.0019	43	1166	18	1	15	4	33	1592	19	1	17	3	3.52676
ENSMUSG00000061601	Pclo	3.328	8.6e-06	0.0019	10	41	3	144	185	221	8	55	3	128	215	187	0.854973
ENSMUSG00000030342	Cd9	-2.607	8.6e-06	0.0019	462	148	170	23	58	46	358	202	183	20	68	39	38.26
ENSMUSG00000022912	Pros1	-6.326	8.7e-06	0.0019	14	52	48	0	0	1	11	71	52	0	0	1	1.17559
ENSMUSG00000025738	Fbxl16	2.502	9.4e-06	0.0021	41	28	19	222	161	116	32	38	21	198	188	98	3.41989
ENSMUSG00000050966	Lin28a	5.097	9.6e-06	0.0021	1	3	0	55	89	19	1	4	0	49	104	16	0.106872
ENSMUSG00000026697	Myoc	-8.806	1e-05	0.0022	134	28	3	0	0	0	104	38	3	0	0	0	11.1146
ENSMUSG00000042751	Nmnat2	4.805	1.2e-05	0.0026	4	1	0	49	39	59	3	2	0	44	46	50	0.320615
ENSMUSG00000029484	Anxa3	-4.409	1.2e-05	0.0026	261	273	32	7	0	20	202	373	35	6	0	17	21.5881
ENSMUSG00000053110	Yap1	-1.881	1.3e-05	0.0027	251	284	325	88	57	89	194	388	351	78	67	75	20.7331
ENSMUSG00000021815	Mss51	-4.153	1.5e-05	0.0031	78	1208	4238	185	54	71	60	1651	4571	165	63	60	6.41229
ENSMUSG00000022816	Fstl1	-3.432	1.5e-05	0.0031	2180	180	214	101	79	58	1689	246	231	90	92	49	180.506
ENSMUSG00000032231	Anxa2	-2.184	1.6e-05	0.0033	297	394	172	92	61	37	230	539	186	82	71	31	24.5805
ENSMUSG00000033788	Dysf	-1.786	1.9e-05	0.0038	306	412	318	116	73	112	237	563	343	103	85	95	25.3286
ENSMUSG00000022122	Ednrb	-7.702	2e-05	0.004	21	32	23	0	0	0	16	44	25	0	0	0	1.70995
ENSMUSG00000103719	Gm38039	7.875	2.1e-05	0.004	0	0	0	10	34	41	0	0	0	9	40	35	0
ENSMUSG00000025875	Tspan17	1.994	2.1e-05	0.004	51	146	126	378	576	339	39	200	136	337	671	286	4.16799
ENSMUSG00000019966	Kitl	-4.328	2.2e-05	0.0042	48	208	36	10	1	4	37	284	39	9	1	3	3.95425
ENSMUSG00000067818	Myl9	-3.908	2.3e-05	0.0044	106	640	1668	48	106	6	82	875	1799	43	123	5	8.76347
ENSMUSG00000027204	Fbn1	-4.63	2.4e-05	0.0044	1119	188	54	45	2	8	867	257	58	40	2	7	92.6577
ENSMUSG00000023959	Clic5	-1.825	2.4e-05	0.0044	1525	1859	1732	301	350	793	1181	2541	1868	268	408	670	126.215
ENSMUSG00000028641	P3h1	-3.598	2.5e-05	0.0046	197	60	172	12	1	22	153	82	185	11	1	19	16.3514
ENSMUSG00000008734	Gprc5b	2.105	2.6e-05	0.0047	41	34	76	181	254	215	32	46	82	161	296	182	3.41989
ENSMUSG00000104435	Gm37422	-1.77	2.6e-05	0.0046	1156	1213	1065	458	378	171	895	1658	1149	408	440	144	95.6501
ENSMUSG00000035696	Rnf38	-2.541	2.7e-05	0.0048	93	127	166	27	15	25	72	173	179	24	17	21	7.69475
ENSMUSG00000027800	Tm4sf1	-10.895	3.1e-05	0.0054	1	699	0	0	0	0	1	954	0	0	0	0	0.106872
ENSMUSG00000046916	Myct1	-8.734	3.6e-05	0.0062	1	138	17	0	0	0	1	188	18	0	0	0	0.106872
ENSMUSG00000033419	Snap91	3.767	3.7e-05	0.0063	12	1	18	133	41	233	9	1	19	118	48	197	0.961844
ENSMUSG00000021708	Rasgrf2	-7.708	3.8e-05	0.0065	19	44	13	0	0	0	15	60	14	0	0	0	1.60307
ENSMUSG00000025203	Scd2	-1.969	4.2e-05	0.0071	203	239	492	102	75	62	157	327	531	91	87	52	16.7788
ENSMUSG00000031748	Gnao1	2.493	4.5e-05	0.0075	41	11	51	170	138	271	32	15	55	151	161	229	3.41989
ENSMUSG00000024981	Acsl5	-7.644	4.7e-05	0.0078	25	12	37	0	0	0	19	16	40	0	0	0	2.03056
ENSMUSG00000021765	Fst	-6.687	4.8e-05	0.0078	127	6	16	0	0	1	99	8	17	0	0	1	10.5803
ENSMUSG00000029712	Actl6b	4.878	4.8e-05	0.0078	2	1	0	25	65	33	2	2	0	22	76	28	0.213743
ENSMUSG00000040181	Fmo1	-4.627	5.3e-05	0.0085	49	95	18	4	2	0	38	129	20	4	2	0	4.06112
ENSMUSG00000066113	Adamtsl1	1.926	5.5e-05	0.0088	68	61	36	190	211	230	53	84	39	169	246	194	5.66419
ENSMUSG00000042978	Sbk1	1.518	5.9e-05	0.0092	198	141	186	500	450	553	153	193	201	445	524	467	16.3514
ENSMUSG00000043670	Diras1	7.524	6.3e-05	0.0098	0	0	0	18	16	33	0	0	0	16	19	28	0
ENSMUSG00000027950	Chrnb2	4.399	6.8e-05	0.01	5	1	1	54	39	45	4	1	1	48	46	38	0.427486
ENSMUSG00000032802	Srxn1	1.981	7e-05	0.011	145	135	138	365	267	1018	112	184	149	325	311	860	11.9696
ENSMUSG00000026547	Tagln2	-4.081	7.6e-05	0.012	49	144	18	6	5	1	38	196	19	5	6	1	4.06112
ENSMUSG00000026921	Egfl7	-7.294	7.8e-05	0.012	0	199	26	1	0	0	0	271	28	1	0	0	0
ENSMUSG00000032334	Loxl1	-3.135	8e-05	0.012	103	62	170	2	23	12	80	85	183	2	27	10	8.54973
ENSMUSG00000045246	Kcng4	2.587	8.7e-05	0.013	26	111	70	321	124	802	20	151	75	286	144	678	2.13743
ENSMUSG00000022661	Cd200	-4.447	9.2e-05	0.014	69	374	20	16	5	0	53	510	22	14	6	0	5.66419
ENSMUSG00000021701	Plk2	-8.416	9.3e-05	0.014	21	104	1	0	0	0	16	141	1	0	0	0	1.70995
ENSMUSG00000027858	Tspan2	-5.129	0.0001	0.014	22	37	25	0	1	1	17	51	27	0	1	1	1.81682
ENSMUSG00000001025	S100a6	-2.142	0.00011	0.015	231	180	150	47	19	61	179	246	162	42	22	52	19.13
ENSMUSG00000106847	Peg13	1.829	0.00011	0.016	93	70	43	211	216	303	72	96	46	188	251	256	7.69475
ENSMUSG00000027435	Cd93	-5.796	0.00012	0.016	3	595	59	1	0	10	2	813	64	1	0	9	0.213743
ENSMUSG00000097974	Gm10605	-2.451	0.00012	0.017	118	287	272	42	71	11	91	392	293	37	82	9	9.72531
ENSMUSG00000057716	Tmem178b	2.309	0.00012	0.016	23	30	29	129	75	206	18	41	31	115	87	174	1.92369
ENSMUSG00000027882	Stxbp3	-1.521	0.00012	0.016	416	795	593	245	204	180	322	1087	640	218	238	152	34.4126
ENSMUSG00000029084	Cd38	-5.813	0.00013	0.018	4	177	22	3	0	0	3	241	24	3	0	0	0.320615
ENSMUSG00000087644	Gm14703	4.317	0.00013	0.018	9	1	0	57	70	56	7	1	0	51	82	47	0.748101
ENSMUSG00000032997	Chpf	2.475	0.00013	0.018	22	12	19	83	94	122	17	17	21	74	109	103	1.81682
ENSMUSG00000054690	Emcn	-6.393	0.00015	0.02	1	194	17	2	0	0	1	264	18	2	0	0	0.106872
ENSMUSG00000052373	Mpp3	1.537	0.00017	0.022	198	222	325	486	717	959	153	304	350	433	835	810	16.3514
ENSMUSG00000008489	Elavl2	4.428	0.00019	0.025	10	0	0	61	45	103	8	0	0	54	52	87	0.854973
ENSMUSG00000087014	Gm16364	-2.826	0.00019	0.025	187	112	35	15	22	10	145	153	38	13	26	8	15.4964
ENSMUSG00000042254	Cilp	-5.659	0.0002	0.026	286	83	0	3	3	0	222	113	0	3	4	0	23.7255
ENSMUSG00000016624	Phf21b	3.657	0.00021	0.026	1	7	3	45	32	69	1	9	3	40	37	58	0.106872
ENSMUSG00000048373	Fgfbp1	-5.116	0.00022	0.028	50	15	19	0	1	1	39	21	20	0	1	1	4.16799
ENSMUSG00000026414	Tnnt2	-5.101	0.00022	0.028	4	131	68	0	5	0	3	178	73	0	6	0	0.320615
ENSMUSG00000016382	Pls3	-2.472	0.00022	0.028	121	207	63	37	18	15	94	283	68	33	21	13	10.0459
ENSMUSG00000073856	Iqck	1.95	0.00026	0.032	61	25	72	145	229	234	47	34	78	129	266	198	5.02296
ENSMUSG00000068036	Mllt4	-2.144	0.00027	0.033	192	297	71	54	36	37	149	405	77	48	42	31	15.9239
ENSMUSG00000037742	Eef1a1	-1.551	0.00027	0.033	857	513	559	289	246	123	664	701	603	257	286	104	70.9627
ENSMUSG00000000805	Car4	-7.81	0.00028	0.034	3	69	10	0	0	0	2	94	11	0	0	0	0.213743
ENSMUSG00000027223	Mapk8ip1	2.179	0.00028	0.034	17	29	23	111	93	114	13	40	25	99	108	96	1.38933
ENSMUSG00000040035	Disp2	5.478	0.00029	0.035	0	0	2	17	11	72	0	0	2	15	13	61	0
ENSMUSG00000012428	Steap4	-4.823	0.00031	0.037	139	44	13	7	0	0	108	60	14	6	0	0	11.5421
ENSMUSG00000005397	Nid1	-3.378	0.00031	0.037	865	197	43	54	5	47	670	270	46	48	6	40	71.604
ENSMUSG00000050014	Apol10b	-8.054	0.00032	0.037	0	61	36	0	0	0	0	83	39	0	0	0	0
ENSMUSG00000070469	Adamtsl3	-6.041	0.00032	0.037	77	9	8	1	0	0	60	12	9	1	0	0	6.41229
ENSMUSG00000034401	Spata6	-4.717	0.00032	0.037	44	26	25	3	0	0	34	35	27	3	0	0	3.63363
ENSMUSG00000007655	Cav1	-3.909	0.00032	0.037	5	1473	290	36	41	40	4	2012	313	32	48	34	0.427486
ENSMUSG00000032968	Inha	1.602	0.00032	0.037	124	86	153	221	385	496	96	118	165	197	448	419	10.2597
ENSMUSG00000074874	Ctla2b	-5.729	0.00035	0.039	13	52	10	1	0	0	10	71	11	1	0	0	1.06872
ENSMUSG00000021390	Ogn	-4.056	0.00035	0.039	353	36	136	29	0	2	274	50	147	26	0	2	29.2828
ENSMUSG00000034457	Eda2r	-1.565	0.00035	0.039	198	312	308	113	92	71	153	427	332	101	107	60	16.3514
ENSMUSG00000032532	Cck	4.636	0.00037	0.042	0	1	7	32	8	172	0	2	7	28	9	146	0
ENSMUSG00000031207	Msn	-2.698	0.00037	0.042	118	147	57	9	8	33	91	201	62	8	9	28	9.72531
ENSMUSG00000001260	Gabrg1	5.335	0.00038	0.042	1	1	0	11	12	68	1	1	0	10	14	58	0.106872
ENSMUSG00000030317	Timp4	-5.851	0.0004	0.044	4	259	10	4	0	0	3	353	11	4	0	0	0.320615
ENSMUSG00000090523	Gypc	-1.648	0.0004	0.044	251	236	382	69	141	66	194	322	412	61	164	56	20.7331
ENSMUSG00000027750	Postn	-7.64	0.00041	0.044	61	5	6	0	0	0	48	7	7	0	0	0	5.12984
ENSMUSG00000000058	Cav2	-4.781	0.00041	0.044	1	418	56	5	1	12	1	570	60	4	1	10	0.106872
ENSMUSG00000034361	Cpne2	-1.488	0.00041	0.044	407	260	235	107	96	118	315	355	254	95	112	100	33.6645
ENSMUSG00000022048	Dpysl2	-2.943	0.00043	0.046	38	117	55	12	4	11	29	160	59	11	5	9	3.09928
ENSMUSG00000079017	Ifi27l2a	-4.354	0.00044	0.046	53	20	48	0	5	0	41	28	52	0	6	0	4.38173
ENSMUSG00000061086	Myl4	-2.035	0.00047	0.05	606	244	667	162	175	32	469	334	719	144	204	27	50.1228

## Sheet: list diff accessible peaks MuSC
List of differentially accessible peaks between WT and REST-cKO Muscle Stem Cells from the ATAC-Seq of MuSCs (only significant: absolute log2FC >1, p-adj<0.05)
chromosome	start	end	width	strand	Conc	Conc_KO	Conc_WT	Fold	p.value	FDR	Gene_Symbol	Distance_to_TSS_bp
chr1	3514208	3515457	1250	*	7.57214	8.32428	5.90884	2.20926	7.2918e-09	1.74574e-06	Xkr4	156665
chr1	3551692	3553417	1726	*	6.44354	7.0488	5.38089	1.46132	1.08927e-05	0.00104888	Xkr4	118943
chr1	3670115	3674265	4151	*	9.6293	10.4605	7.45069	2.80501	1.29486e-14	2.1172e-11	Xkr4	-692
chr11	3754005	3755949	1945	*	6.95157	7.55062	5.90848	1.43644	2.66228e-06	0.000303285	Osbp2	19691
chr11	3773843	3775704	1862	*	7.95594	8.7651	5.94326	2.61561	4.53245e-12	3.04598e-09	Osbp2	-106
chr12	3879293	3880140	848	*	4.93524	5.50614	3.97661	1.31901	0.000867683	0.0444715	Dnmt3a	-12027
chr15	3960189	3960554	366	*	4.3612	3.55142	4.87674	-1.51801	0.000891051	0.0453903	Fbxo4	19201
chr12	3959281	3960979	1699	*	8.6011	9.0967	7.84012	1.05226	0.00035049	0.0204099	Pomc	5185
chr11	3997923	3998970	1048	*	6.23936	6.77106	5.38828	1.17661	0.000124707	0.0084	Gal3st1	8514
chr11	4031720	4033822	2103	*	7.16409	7.70108	6.2991	1.19683	4.39706e-05	0.00348022	Sec14l4	989
chr19	4718956	4720371	1416	*	5.68767	6.21241	4.8546	1.15063	0.000638621	0.0343131	Sptbn2	8456
chr11	4749851	4750886	1036	*	5.5226	4.89189	5.95997	-1.26835	0.000118817	0.00807501	Cabp7	-3190
chr11	4760210	4761436	1227	*	6.52653	7.01376	5.78534	1.02291	0.000493509	0.0276196	Cabp7	-13644
chr11	4945271	4950467	5197	*	9.2744	9.80058	8.43761	1.15876	9.34792e-05	0.00664547	Nefh	195
chr19	4988534	4991379	2846	*	7.66292	8.26208	6.61948	1.43757	9.39016e-06	0.000915832	Npas4	14
chr19	4992550	4993938	1389	*	7.51149	8.126	6.41903	1.50178	3.05025e-06	0.00034005	Npas4	-3273
chr19	4998848	5000275	1428	*	6.17255	6.97782	4.18705	2.57901	4.30643e-11	2.10005e-08	Npas4	-9591
chr19	5001286	5002924	1639	*	8.83644	9.52107	7.48801	1.82845	1.53423e-08	3.29736e-06	Npas4	-12134
chr1	5017921	5023941	6021	*	10.3578	11.0819	8.83513	2.0426	1.31526e-10	5.32418e-08	Rgs20	-1392
chr19	5080603	5082727	2125	*	6.86978	7.55373	5.52413	1.82303	2.91967e-08	5.75575e-06	Tmem151a	3812
chr19	5083555	5086642	3088	*	8.62922	9.36506	7.04988	2.11027	2.65143e-09	7.39465e-07	Tmem151a	378
chr12	5108025	5109661	1637	*	7.43821	7.99771	6.51203	1.28066	3.23459e-05	0.00265481	Atad2b	191490
chr16	5884871	5885602	732	*	5.01761	5.72344	3.57901	1.93006	5.20962e-06	0.000544392	Rbfox1	444
chr11	6011563	6019755	8193	*	9.95062	10.5963	8.75161	1.64044	2.33804e-08	4.74371e-06	Camk2b	50089
chr19	6181860	6184506	2647	*	7.66453	8.20436	6.79203	1.20753	9.73686e-05	0.00686927	Majin	-1227
chr7	6343250	6344429	1180	*	7.35135	7.992	6.17009	1.61642	6.91848e-07	9.20136e-05	Zfp583	-13406
chr7	6357658	6359776	2119	*	6.49627	7.08659	5.48007	1.40027	1.27405e-05	0.00119776	Zfp78	-4591
chr7	6386722	6387982	1261	*	6.5531	7.21196	5.30555	1.69962	6.42212e-07	8.58227e-05	Zfp28	4034
chr7	6397866	6399641	1776	*	7.53125	8.16172	6.38544	1.57102	1.29104e-06	0.000160206	Zfp28	15436
chr7	6409977	6410722	746	*	5.86615	4.80561	6.47074	-1.86388	1.43903e-07	2.29851e-05	Smim17	-4844
chr7	6434350	6435728	1379	*	6.59473	7.21445	5.48515	1.52293	1.36422e-05	0.00126542	Olfr1344	-4863
chr19	6497814	6505203	7390	*	9.51152	10.0698	8.58884	1.27672	8.2696e-06	0.000818995	Slc22a12	41561
chr10	7491404	7493063	1660	*	7.26174	8.06519	5.28876	2.56893	5.22797e-11	2.46302e-08	Ulbp1	-18757
chrX	7637902	7640610	2709	*	7.3456	7.83737	6.59372	1.03882	0.000565817	0.0311028	Syp	676
chrX	7821362	7822887	1526	*	6.87145	7.41676	5.98426	1.22706	6.64181e-05	0.00493191	Kcnd1	-1634
chr3	8050911	8051708	798	*	4.99899	5.63708	3.82675	1.59865	0.000127223	0.00852129	1700010I02Rik	-96423
chr2	8112158	8113177	1020	*	6.68751	5.71473	7.26329	-1.74991	2.44637e-05	0.00211181	Celf2	-716470
chr2	8115649	8116794	1146	*	5.40188	4.61579	5.90786	-1.49102	0.000200923	0.0126801	Celf2	-720024
chr2	8165126	8165876	751	*	5.59369	4.52712	6.20018	-1.87115	3.96292e-05	0.00318059	Celf2	-769303
chr8	8298997	8300267	1271	*	5.40726	4.65341	5.89986	-1.44552	3.95354e-05	0.00317612	Efnb2	361610
chr3	8509028	8509985	958	*	4.93162	5.6246	3.54845	1.86186	1.48272e-05	0.0013535	Stmn2	-20
chr3	8510618	8512098	1481	*	6.14893	6.70037	5.24506	1.2488	3.77045e-05	0.0030437	Stmn2	1831
chr8	8532402	8533833	1432	*	6.75264	6.12131	7.19032	-1.27132	4.31547e-05	0.003424	Efnb2	128124
chr6	8947916	8951722	3807	*	8.46235	9.19036	6.92135	2.06403	2.59956e-09	7.31247e-07	Nxph1	-200
chr6	8955899	8957771	1873	*	5.66329	6.43097	3.91413	2.30402	1.02163e-08	2.31501e-06	Nxph1	6816
chr6	8957786	8959547	1762	*	5.78547	6.51993	4.21301	2.09601	8.23731e-09	1.91337e-06	Nxph1	8648
chr4	9184345	9185546	1202	*	6.27728	6.90926	5.12626	1.57593	1.00873e-06	0.000127838	Clvs1	-84347
chr4	9236726	9237999	1274	*	6.54982	7.1852	5.38702	1.59151	1.295e-06	0.00016022	Clvs1	-31930
chr4	9269008	9271116	2109	*	8.79816	9.70224	5.83968	3.65593	2.36487e-16	1.46942e-12	Clvs1	745
chr4	9283674	9288404	4731	*	8.90429	9.58292	7.58014	1.79821	2.36149e-08	4.76814e-06	Clvs1	16722
chr4	9317497	9318567	1071	*	5.80455	6.5086	4.37377	1.92483	5.64251e-07	7.66324e-05	Clvs1	48715
chr4	9320971	9322461	1491	*	6.78519	7.44737	5.52512	1.71579	5.72062e-08	1.0393e-05	Clvs1	52399
chr14	9488124	9488977	854	*	4.83317	4.10438	5.31507	-1.40728	0.000489369	0.0274167	Mnd1-ps	-395544
chr8	9607204	9608112	909	*	4.95602	5.66786	3.49049	1.96257	2.89878e-06	0.000325776	Fam155a	163365
chr8	9769277	9772966	3690	*	8.08186	8.91698	5.87091	2.83965	5.88246e-13	5.398e-10	Fam155a	35
chr16	9994794	9995885	1092	*	6.213	6.69491	5.48421	1.00489	0.000809963	0.042056	Grin2a	473
chr12	10350297	10351285	989	*	6.32868	5.84363	6.69104	-1.04961	0.000849372	0.0437482	Nt5c1b	-19180
chr19	10394750	10395839	1090	*	6.60398	7.15738	5.69473	1.25683	3.28049e-05	0.00268456	Syt7	6205
chr19	10404148	10404836	689	*	4.82224	5.6092	2.9575	2.43057	4.62464e-07	6.44351e-05	Syt7	15402
chr19	10422167	10423537	1371	*	6.73346	7.24559	5.93219	1.10801	0.000256738	0.0155026	Syt7	33762
chr17	11572301	11573203	903	*	6.18215	5.4934	6.64641	-1.35429	5.00823e-05	0.00388333	D17Ertd648e	310437
chr16	11599052	11600216	1165	*	6.30664	5.49288	6.82377	-1.53207	1.54794e-06	0.00018726	4833415N18Rik	-180068
chr14	12344873	12345714	842	*	4.99507	5.58656	3.97531	1.40054	0.000300758	0.0179015	Fezf2	571
chr14	12459183	12459974	792	*	4.62613	5.30573	3.29807	1.79134	7.31825e-05	0.00537202	Fezf2	-113714
chr14	12529862	12531386	1525	*	6.8804	7.49439	5.78962	1.49889	1.35222e-06	0.000165824	Fezf2	-184759
chr14	12561612	12562782	1171	*	6.23342	6.73894	5.44844	1.08448	0.000311189	0.0184041	Fezf2	-216332
chr14	12820599	12823780	3182	*	8.5339	9.44463	5.47505	3.76214	4.16284e-17	4.95907e-13	Cadps	889
chr8	13445286	13448044	2759	*	8.35878	8.84448	7.62117	1.01894	0.000805013	0.0418251	Tmem255b	11206
chr17	13923026	13926486	3461	*	7.478	8.01379	6.6162	1.19268	6.1764e-05	0.00464422	Gm7168	-23617
chr17	13935095	13937299	2205	*	7.80716	8.40908	6.75504	1.44911	4.11303e-06	0.000439719	Gm7168	-12176
chr17	13938286	13939219	934	*	5.46545	6.02385	4.54233	1.27332	0.000174237	0.0111937	Gm7168	-9620
chr8	14072466	14073028	563	*	4.4263	2.61958	5.2038	-2.762	1.80434e-07	2.80712e-05	Erich1	17580
chr8	14095301	14098547	3247	*	8.28083	8.80507	7.44903	1.15158	0.000118363	0.0080574	Dlgap2	1049
chr10	14233503	14234459	957	*	5.47166	4.92683	5.8662	-1.13996	0.000824	0.042579	Hivep2	267602
chr5	14514329	14515931	1603	*	8.74182	9.37741	7.57829	1.5946	6.41283e-07	8.58227e-05	Pclo	212
chr4	15880843	15882428	1586	*	6.5197	7.11816	5.47843	1.43343	2.70799e-06	0.000307233	Calb1	372
chr7	16127443	16133162	5720	*	9.62818	10.1554	8.78871	1.16254	2.69268e-05	0.00227959	Slc8a2	477
chr7	16146201	16148371	2171	*	7.75456	8.56111	5.76022	2.59437	5.64643e-12	3.56705e-09	Slc8a2	17460
chr7	16148821	16150151	1331	*	6.00442	6.80905	4.02339	2.57298	3.49357e-10	1.23443e-07	Slc8a2	19660
chr7	16158395	16159881	1487	*	6.52527	7.28774	4.80554	2.27344	2.30864e-10	8.67185e-08	Meis3	-16257
chr7	16160960	16162352	1393	*	5.17756	5.7981	4.06523	1.52234	4.80992e-05	0.00375557	Meis3	-13739
chr2	16168592	16169494	903	*	5.36386	4.72818	5.8036	-1.27518	0.00026691	0.0160819	Plxdc2	-187261
chr12	16652394	16655857	3464	*	9.46995	10.0515	8.48015	1.36712	8.88796e-07	0.000114376	Ntsr2	656
chr12	16657266	16657774	509	*	4.9984	5.77372	3.2047	2.35083	1.45134e-07	2.30965e-05	Ntsr2	4050
chr12	16662161	16663995	1835	*	5.94579	6.53171	4.94291	1.38149	1.48352e-05	0.0013535	Ntsr2	9608
chr1	17145097	17146360	1264	*	7.06526	7.92788	4.60452	3.11336	1.36435e-13	1.61544e-10	Gdap1	356
chr14	17205608	17206558	951	*	5.39258	4.71604	5.85131	-1.33483	0.000596617	0.0325105	Pou5f1-rs6	100525
chr7	18950505	18951873	1369	*	6.33457	6.85197	5.52013	1.12591	0.000149321	0.00982771	Nova2	25301
chr2	19429409	19432355	2947	*	7.32077	7.81103	6.57245	1.03374	0.000374588	0.021602	Ptf1a	-14781
chr3	19706247	19707359	1113	*	5.90373	6.61556	4.43825	1.96757	3.38751e-08	6.49383e-06	Crh	-11407
chr13	20048202	20048965	764	*	4.88454	4.11741	5.3827	-1.46219	0.000231359	0.0142594	Elmo1	-41923
chr13	20232058	20232808	751	*	4.62933	3.89343	5.1143	-1.41683	0.000913602	0.0463973	Elmo1	141926
chr10	20422746	20423917	1172	*	7.05482	6.37164	7.51657	-1.3475	1.87276e-05	0.00166846	Mtfr2	75513
chrX	20918367	20922466	4100	*	8.34977	8.92712	7.37237	1.3502	1.87972e-05	0.00167287	Syn1	501
chr2	21366893	21368827	1935	*	7.1013	7.94237	4.84024	2.89321	3.03888e-12	2.16589e-09	Gpr158	293
chr9	21943580	21944956	1377	*	6.00226	6.69202	4.6326	1.85062	6.77227e-08	1.19779e-05	Plppr2	5994
chr5	22031231	22032633	1403	*	7.34495	7.82661	6.61673	1.00508	0.000941828	0.04757	Slc26a5	-166328
chr9	22053870	22055917	2048	*	8.42082	9	7.43802	1.35745	1.68729e-05	0.00151455	Elavl3	-2871
chr19	23473847	23474493	647	*	4.44961	5.07102	3.33442	1.52207	0.000837222	0.0432024	Mamdc2	-25848
chr13	23990829	23991865	1037	*	5.22227	5.85161	4.08028	1.56089	5.15955e-05	0.00398379	Scgn	-133
chr8	24087252	24088206	955	*	5.61672	4.83219	6.12206	-1.48952	2.60328e-05	0.00222423	Tcim	351217
chr8	24129653	24130280	628	*	4.74284	3.96039	5.24733	-1.48317	0.000294056	0.0175275	Tcim	308979
chr8	24203380	24204851	1472	*	7.33235	6.77608	7.73283	-1.15973	0.000161842	0.0105026	Tcim	234830
chr5	24279475	24280258	784	*	5.25032	5.83345	4.2558	1.3683	0.000163596	0.0105999	Mir684-1	22339
chr5	24285842	24287126	1285	*	6.62439	7.19209	5.67498	1.31122	2.97906e-05	0.00247925	Mir684-1	28956
chr5	24298975	24300512	1538	*	6.36108	6.95387	5.33735	1.41003	1.10091e-05	0.00105739	Kcnh2	29847
chr5	24333824	24336803	2980	*	8.13885	8.76915	6.9936	1.57074	2.29021e-06	0.000264513	Kcnh2	-5723
chr5	24343703	24345764	2062	*	7.76821	8.33674	6.8164	1.31551	1.41034e-05	0.0013015	Kcnh2	6870
chr5	24347361	24354036	6676	*	10.8758	11.5305	9.64394	1.68245	1.84809e-09	5.40737e-07	Kcnh2	905
chr5	24360339	24361578	1240	*	7.4081	8.01577	6.33775	1.47277	1.88132e-06	0.00022096	Nos3	-3860
chr2	24562805	24563346	542	*	4.50137	5.1676	3.22588	1.72477	0.000215817	0.0135009	Pax8	-87477
chr2	24632576	24634387	1812	*	5.73316	6.58765	3.35146	3.01767	1.14983e-10	4.84259e-08	Cacna1b	129670
chr2	24640510	24643707	3198	*	6.37992	7.08233	4.95633	1.91791	3.78739e-07	5.41726e-05	Cacna1b	121043
chr2	24645188	24647268	2081	*	5.7861	6.57651	3.89948	2.46362	7.31248e-09	1.74574e-06	Cacna1b	116924
chr2	24647902	24651099	3198	*	6.19202	6.95812	4.4518	2.29611	2.96857e-09	8.22413e-07	Cacna1b	113651
chr2	24652133	24655436	3304	*	6.33214	7.16242	4.16051	2.78975	8.39616e-12	5.00105e-09	Cacna1b	109367
chr2	24657201	24660138	2938	*	6.37528	7.13787	4.65493	2.27367	9.61163e-10	3.11869e-07	Cacna1b	104482
chr2	24660995	24662505	1511	*	5.29866	6.0639	3.56339	2.28497	7.05841e-08	1.23914e-05	Cacna1b	101402
chr2	24666604	24667159	556	*	3.74114	4.4402	2.33207	1.87988	0.000669192	0.0357255	Cacna1b	96270
chr2	24668185	24669167	983	*	4.75184	5.43682	3.40196	1.81909	5.05057e-05	0.00390688	Cacna1b	94476
chr2	24674404	24675379	976	*	5.32705	6.10484	3.51861	2.37021	1.88358e-08	3.97645e-06	Cacna1b	88260
chr2	24677136	24678639	1504	*	5.93875	6.69827	4.23539	2.25165	1.12409e-08	2.50632e-06	Cacna1b	85264
chr2	24679049	24681412	2364	*	6.36527	7.02635	5.10935	1.70962	2.67195e-07	3.98588e-05	Cacna1b	82921
chr2	24682716	24691813	9098	*	8.0865	8.86435	6.27769	2.38094	1.09968e-09	3.50004e-07	Cacna1b	75887
chr2	24692431	24695002	2572	*	6.33261	7.21837	3.6172	3.38456	7.2186e-13	6.37337e-10	Cacna1b	69435
chr2	24697197	24699153	1957	*	5.82379	6.63893	3.76813	2.65623	1.34e-10	5.34648e-08	Cacna1b	64977
chr2	24701863	24703182	1320	*	5.35479	6.09081	3.77455	2.10267	2.54299e-07	3.81399e-05	Cacna1b	60629
chr2	24704750	24708204	3455	*	6.41846	7.22079	4.45312	2.55723	7.71843e-10	2.53399e-07	Cacna1b	56675
chr2	24729775	24730740	966	*	4.78837	5.59396	2.80064	2.56905	4.52225e-07	6.34858e-05	Cacna1b	32894
chr7	24735615	24736990	1376	*	6.8689	7.36475	6.1073	1.05225	0.000756837	0.0396432	Lypd11	-9395
chr2	24741334	24743259	1926	*	5.70008	6.53689	3.47515	2.84475	9.55199e-11	4.08477e-08	Cacna1b	20855
chr2	24746858	24748384	1527	*	6.21685	7.02408	4.21772	2.59464	5.78799e-10	1.94619e-07	Cacna1b	15531
chr2	24750065	24750725	661	*	4.2951	5.09737	2.3302	2.53458	8.20148e-06	0.000813214	Cacna1b	12757
chr2	24751984	24753117	1134	*	5.12746	5.82074	3.74305	1.86449	3.34682e-06	0.000369164	Cacna1b	10601
chr2	24755044	24756190	1147	*	5.23647	5.96878	3.67455	2.07997	9.36584e-07	0.00011997	Cacna1b	7535
chr2	24759353	24763600	4248	*	9.49218	10.2976	7.50601	2.58683	7.89622e-13	6.78823e-10	Cacna1b	1675
chr2	24765305	24768397	3093	*	8.42462	9.34099	5.27437	3.85861	6.39246e-17	6.66326e-13	Cacna1b	-3699
chr2	24786704	24788222	1519	*	6.48654	7.0301	5.60406	1.22014	4.65262e-05	0.00365327	Cacna1b	-24311
chr7	25005157	25007750	2594	*	8.04711	8.74234	6.65444	1.88275	6.84976e-08	1.2076e-05	Atp1a3	-517
chr7	25008023	25011376	3354	*	8.84476	9.45415	7.76887	1.48085	2.62162e-06	0.000299573	Atp1a3	-3763
chr7	25025884	25026811	928	*	6.99097	7.48662	6.22986	1.05167	0.000184494	0.0117891	Atp1a3	-20411
chr1	25228279	25229348	1070	*	6.193	6.92235	4.64553	2.06774	6.52471e-09	1.61931e-06	Gm20172	49140
chr13	25256167	25258723	2557	*	8.85002	9.40785	7.92848	1.27503	3.20324e-05	0.00263266	Nrsn1	12551
chr13	25266687	25267380	694	*	5.02334	5.92312	2.12597	3.55771	1.09015e-10	4.61453e-08	Nrsn1	2962
chr13	25268111	25270689	2579	*	8.26685	9.15682	5.49938	3.45011	3.25507e-15	7.98344e-12	Nrsn1	596
chr13	25274452	25275397	946	*	4.45346	5.20551	2.79063	2.19127	1.35283e-05	0.0012589	Nrsn1	-4929
chr13	25288391	25288962	572	*	3.9909	4.78332	2.09131	2.45451	5.22145e-05	0.00401671	Nrsn1	-18681
chr2	25304390	25306138	1749	*	7.51389	8.0199	6.72773	1.0874	0.000236998	0.0145423	Grin1	13923
chr13	25309857	25310845	989	*	5.42491	6.12923	3.99291	1.92451	4.95886e-07	6.84626e-05	Nrsn1	-40355
chr2	25317904	25319864	1961	*	8.14766	8.67577	7.3059	1.16534	0.00018625	0.0118922	Grin1	303
chr17	25320619	25321131	513	*	4.52895	5.1884	3.2792	1.69341	0.000144985	0.009603	Prss29	2221
chr17	25372300	25375062	2763	*	7.57659	8.23845	6.31772	1.71535	4.12477e-07	5.84966e-05	Tpsg1	3128
chr17	25379316	25380565	1250	*	5.04313	5.64417	3.99378	1.43982	0.000196899	0.0124482	Tpsg1	9388
chr17	25381814	25382447	634	*	4.1991	4.86761	2.9148	1.73285	0.000548783	0.0302862	Tpsg1	11578
chr17	25397200	25402549	5350	*	9.2371	9.9279	7.86309	1.86035	7.22655e-09	1.73788e-06	Tpsg1	29322
chr17	25404343	25412219	7877	*	10.6196	11.1949	9.64802	1.34284	8.29963e-07	0.000107469	Cacna1h	25502
chr17	25413841	25417523	3683	*	8.25449	8.84268	7.24477	1.39329	1.44639e-05	0.00132833	Cacna1h	18101
chr17	25417858	25435340	17483	*	10.8553	11.4462	9.83762	1.40449	2.02902e-07	3.11026e-05	Cacna1h	7184
chr17	25448922	25451226	2305	*	7.62886	8.40892	5.8067	2.39587	7.36444e-11	3.26656e-08	Cacna1h	-16291
chr17	25462577	25463419	843	*	4.55896	5.29179	2.9945	2.07733	1.60279e-05	0.00144736	Tekt4	-8592
chr17	25463788	25464671	884	*	4.96779	5.64405	3.65308	1.77743	1.24571e-05	0.00117643	Tekt4	-7360
chr17	25467372	25470551	3180	*	9.33325	9.88479	8.42911	1.25146	1.54393e-05	0.00140095	Tekt4	-2628
chr18	25557620	25559268	1649	*	6.21024	6.79652	5.20628	1.38347	2.80534e-05	0.00236059	Celf4	121304
chr18	25597053	25598085	1033	*	6.10624	6.72388	5.0035	1.51302	1.92679e-06	0.000225982	Celf4	82179
chr18	25599878	25601198	1321	*	5.70944	6.32338	4.61886	1.49613	9.41341e-06	0.000917026	Celf4	79210
chr18	25606520	25607548	1029	*	5.75437	6.5903	3.53672	2.83719	2.69946e-11	1.41576e-08	Celf4	72714
chr18	25617326	25619024	1699	*	5.53098	6.13689	4.46626	1.46179	0.000217028	0.0135612	Celf4	61573
chr18	25620779	25622891	2113	*	8.35397	8.88257	7.51095	1.16717	0.000125131	0.00842174	Celf4	57913
chr18	25639050	25640580	1531	*	6.61899	7.34369	5.09383	2.04217	6.49831e-09	1.61757e-06	Celf4	39933
chr18	25643944	25648275	4332	*	8.3806	9.03419	7.15267	1.67677	3.5463e-07	5.12517e-05	Celf4	33638
chr18	25656268	25658224	1957	*	7.80583	8.64472	5.56337	2.87436	2.66373e-11	1.41481e-08	Celf4	22502
chr18	25662264	25664433	2170	*	8.66582	9.35528	7.29743	1.85313	2.22442e-08	4.55755e-06	Celf4	16399
chr18	25670218	25671171	954	*	5.42742	6.05217	4.30103	1.54154	2.72104e-05	0.00229894	Celf4	9053
chr18	25678434	25680809	2376	*	8.50304	9.35952	6.10242	3.05102	1.61135e-13	1.84067e-10	Celf4	126
chr18	25693409	25695198	1790	*	6.66388	7.40605	5.05265	2.14553	7.1667e-10	2.37152e-07	Celf4	-14556
chr18	25714009	25716141	2133	*	7.13872	7.98727	4.81179	2.96628	3.2719e-13	3.4105e-10	Celf4	-35327
chr18	25725330	25727698	2369	*	6.90454	7.51756	5.81693	1.49477	1.54942e-06	0.00018726	Celf4	27643
chr18	25752116	25756427	4312	*	9.23583	10.1364	6.32706	3.60353	2.49907e-16	1.46942e-12	Celf4	-115
chr17	25756117	25757839	1723	*	6.91997	7.49115	5.96054	1.32506	7.25276e-05	0.00533334	Msln	-2600
chr17	25761146	25762433	1288	*	6.58244	7.10172	5.76323	1.13287	7.98421e-05	0.00580973	Msln	-7412
chr18	25770554	25771832	1279	*	5.63294	6.52757	2.80531	3.49608	3.06974e-12	2.16934e-09	Celf4	-17036
chr18	25772281	25773675	1395	*	6.69198	7.63231	3.06653	4.34274	2.14011e-17	3.48932e-13	Celf4	-18821
chr17	25807686	25810724	3039	*	9.57363	10.0777	8.79217	1.0814	0.000208115	0.0130681	Fbxl16	120
chr1	25829391	25831338	1948	*	6.89343	7.41295	6.07363	1.13401	0.00013197	0.00881796	Adgrb3	-658
chr2	25862482	25866416	3935	*	8.64092	9.1303	7.89469	1.0313	0.000412365	0.0235203	Kcnt1	654
chr2	26177471	26178849	1379	*	5.80418	6.4069	4.74956	1.44945	1.03074e-05	0.000998286	Lhx3	28415
chr2	26201471	26203701	2231	*	7.4353	8.19468	5.73273	2.25551	3.12669e-10	1.11902e-07	Lhx3	3989
chr2	26205931	26208783	2853	*	7.7797	8.35461	6.80944	1.34034	1.28827e-05	0.00120705	Lhx3	-782
chr2	26254393	26255724	1332	*	6.60643	7.20521	5.56417	1.4348	1.6055e-05	0.00144736	Qsox2	-17660
chr2	26268002	26268611	610	*	4.71908	5.3843	3.44746	1.72225	4.6732e-05	0.0036633	Ccdc187	26250
chr15	26307640	26310270	2631	*	8.49253	9.39757	5.52009	3.67013	8.01016e-16	2.90417e-12	2024-03-11	-93
chr15	26340149	26340762	614	*	4.25666	5.0572	2.30345	2.52213	4.54165e-06	0.000482451	2024-03-11	31408
chr8	26523635	26524663	1029	*	5.58096	4.98729	6.00033	-1.21358	0.00019521	0.0123696	2310008N11Rik	300274
chr5	26903330	26906449	3120	*	10.2841	10.7654	9.55658	1.00481	9.83089e-05	0.00692974	Dpp6	112
chr5	26911947	26912910	964	*	5.94597	6.46811	5.11951	1.14206	0.000192184	0.0122122	Dpp6	7651
chr5	26941162	26942768	1607	*	7.22866	7.75525	6.39084	1.15937	0.000116258	0.00793992	Dpp6	37187
chr5	26945308	26945873	566	*	4.94982	5.55269	3.89472	1.44673	0.000278252	0.0166809	Dpp6	40813
chr5	27029430	27030274	845	*	5.07123	5.63543	4.13179	1.29397	0.000603607	0.0327697	Dpp6	-19347
chr5	27047903	27053501	5599	*	9.6036	10.4772	7.02797	3.24415	5.14205e-16	2.14395e-12	Dpp6	1503
chr5	27053790	27055178	1389	*	5.50084	6.35064	3.16259	2.96759	4.16186e-11	2.05357e-08	Dpp6	5285
chr5	27063948	27064838	891	*	4.7752	5.55327	2.96509	2.36605	5.76136e-06	0.000596212	Dpp6	15194
chr5	27066154	27069405	3252	*	7.56341	8.45873	4.72676	3.52212	2.2939e-14	3.41582e-11	Dpp6	18581
chr5	27074655	27076261	1607	*	6.88759	7.5815	5.5005	1.87439	2.61002e-08	5.20686e-06	Dpp6	26259
chr5	27109395	27112574	3180	*	7.07374	7.78655	5.60382	1.97623	7.78445e-09	1.82856e-06	Dpp6	61786
chr5	27123079	27123654	576	*	4.49829	5.19595	3.09524	1.88155	0.000504686	0.0281507	Dpp6	74168
chr5	27137719	27138432	714	*	4.64273	5.43945	2.71508	2.49941	1.14769e-06	0.000144352	Dpp6	88877
chr5	27206158	27207415	1258	*	6.11018	6.98681	3.50121	3.268	1.06209e-12	8.769e-10	Dpp6	-55148
chr17	27224214	27231582	7369	*	8.87887	9.59769	7.38136	2.01163	1.2406e-09	3.87462e-07	9630028I04Rik	20168
chr5	27254653	27256249	1597	*	7.35464	8.04182	5.99565	1.84031	2.05143e-08	4.266e-06	Dpp6	-6484
chr17	27256825	27258087	1263	*	6.09789	6.65833	5.16906	1.28255	3.16064e-05	0.0026018	9630028I04Rik	-9390
chr2	27299572	27301802	2231	*	7.14551	7.67316	6.30495	1.1631	5.56735e-05	0.00423978	Sardh	-53384
chr5	27303551	27303937	387	*	3.93216	4.7205	2.05864	2.42457	2.62202e-05	0.00223407	Dpp6	41809
chr17	27331714	27332894	1181	*	6.2698	6.76613	5.50707	1.05318	0.000661678	0.0353697	Mir7216	3919
chr5	27348382	27349835	1454	*	5.56354	6.38763	3.4406	2.72994	3.28429e-10	1.16542e-07	Dpp6	87174
chr3	27370347	27373276	2930	*	7.48425	8.13843	6.25414	1.67885	4.29633e-07	6.06204e-05	Ghsr	461
chr7	27395022	27398487	3466	*	8.1616	8.69584	7.30386	1.18744	7.24343e-05	0.00533118	Sptbn4	-202
chr5	27416210	27417161	952	*	4.99358	5.59064	3.95666	1.42357	0.000334614	0.019622	Speer4b	84706
chr5	27423193	27426083	2891	*	7.59971	8.30647	6.15694	1.94385	7.98719e-09	1.86567e-06	Speer4b	76754
chr5	27432848	27434294	1447	*	7.6986	8.34634	6.49203	1.6491	1.64515e-07	2.58357e-05	Speer4b	67821
chr5	27456610	27458355	1746	*	6.22625	6.92258	4.82889	1.88541	3.15475e-08	6.18992e-06	Speer4b	43909
chr5	27477803	27478967	1165	*	5.68452	6.44354	3.98393	2.24711	2.02345e-08	4.22056e-06	Speer4b	23007
chr5	27488751	27489799	1049	*	5.2513	5.98676	3.67388	2.09847	2.0276e-06	0.000236806	Speer4b	12117
chr17	27500522	27501501	980	*	5.64543	6.25619	4.56512	1.48265	4.96485e-05	0.00386207	Grm4	2521
chr5	27623663	27624211	549	*	4.49018	5.26939	2.67319	2.3714	2.07212e-06	0.000241667	Speer4b	-122545
chr5	27651260	27653107	1848	*	7.3841	8.0049	6.2709	1.52864	1.11064e-06	0.000140326	Paxip1	139366
chr5	27659297	27660898	1602	*	6.54627	7.26973	5.02698	2.03501	2.49396e-09	7.04979e-07	Paxip1	131452
chr15	27665184	27666117	934	*	5.94954	6.53319	4.95348	1.37247	4.28206e-05	0.00340397	Otulinl	15891
chr15	27669429	27671037	1609	*	7.0483	7.60322	6.13486	1.26301	2.64203e-05	0.00224583	Otulinl	11309
chr15	27674033	27674950	918	*	5.6224	6.24614	4.49937	1.53784	1.4801e-05	0.0013535	Otulinl	7050
chr5	27677051	27677854	804	*	5.48532	6.02884	4.60296	1.21796	0.000301093	0.0179086	Paxip1	114097
chr17	27721260	27722514	1255	*	6.33597	6.89569	5.40915	1.28034	5.23482e-05	0.00402329	Spdef	7064
chr5	27841731	27843145	1415	*	6.01487	6.69387	4.68922	1.79606	1.04337e-07	1.74711e-05	Htr5a	491
chr7	28257996	28260414	2419	*	6.88486	7.68349	4.9445	2.53047	3.2629e-11	1.66926e-08	Eid2	-8676
chr7	28265237	28265888	652	*	5.18977	5.85225	3.92857	1.71207	1.41092e-05	0.0013015	Eid2	-2318
chr7	28266388	28269819	3432	*	9.07889	9.56548	8.33922	1.02206	0.000302618	0.0179737	Eid2	223
chr7	28289744	28291962	2219	*	7.97721	8.48305	7.19147	1.08703	0.000275313	0.0165285	Selenov	333
chr6	28345113	28345851	739	*	4.88916	5.57717	3.52678	1.836	1.53526e-05	0.00139459	Zfp800	52523
chr16	28564126	28565716	1591	*	7.57372	8.40413	5.40112	2.79567	2.64895e-11	1.41481e-08	Fgf12	30
chr17	28574534	28577362	2829	*	8.72544	9.51877	6.81994	2.49367	7.91053e-12	4.78763e-09	Lhfpl5	229
chr17	28586253	28587256	1004	*	5.31584	5.90163	4.31334	1.3792	0.000160862	0.0104553	Lhfpl5	11036
chr16	28752013	28754332	2320	*	8.03469	8.52538	7.28537	1.03551	0.000565742	0.0311028	Fgf12	70
chr2	28913145	28913995	851	*	4.81706	5.47036	3.59016	1.66707	8.03901e-05	0.00583942	Barhl1	-1075
chr2	28914234	28915292	1059	*	5.3907	5.95916	4.43911	1.31152	0.000159056	0.010354	Barhl1	1658
chr2	28915768	28919221	3454	*	9.40494	9.95133	8.51485	1.23228	1.72711e-05	0.00154696	Barhl1	-827
chr6	28979722	28982802	3081	*	8.80842	9.39559	7.80177	1.38941	6.01107e-06	0.000620368	Mir129-1	-41357
chr10	29142558	29149235	6678	*	10.5488	11.2219	9.24676	1.77102	9.56457e-09	2.18515e-06	Soga3	1901
chr10	29176451	29178957	2507	*	7.22818	7.91287	5.87948	1.82744	9.58431e-08	1.62775e-05	Soga3	33708
chr10	29206014	29207552	1539	*	6.89926	7.41362	6.09243	1.11593	0.00023229	0.0142955	9330159F19Rik	-4860
chr2	29572942	29573519	578	*	4.44974	5.14984	3.03617	1.8946	4.59123e-05	0.0036187	Rapgef1	-46489
chr2	29592232	29593497	1266	*	6.37116	6.96401	5.34723	1.41032	1.51794e-05	0.00138037	Rapgef1	-26855
chr14	29645219	29645909	691	*	5.0315	5.6463	3.93811	1.49696	0.000243829	0.0148739	Cacna2d3	76300
chr7	30331271	30333111	1841	*	7.63179	8.11868	6.89141	1.02262	0.000769065	0.0402079	Sdhaf1	-9816
chr7	30339276	30340049	774	*	4.84082	5.51159	3.54774	1.74998	3.68289e-05	0.00297589	Sdhaf1	-17288
chr7	30352516	30354735	2220	*	7.23919	7.97044	5.68248	2.08153	1.05035e-09	3.36877e-07	Lrfn3	9146
chr17	30388155	30390172	2018	*	6.07376	6.56886	5.31397	1.04869	0.000910014	0.0462714	Gm6402	7016
chr17	30390732	30392099	1368	*	5.38899	5.94601	4.46971	1.26789	0.000268689	0.0161657	Gm6402	4764
chr7	30391935	30393243	1309	*	5.93774	6.56556	4.80095	1.55674	1.91088e-05	0.00169698	Tyrobp	-21193
chr7	30399356	30401139	1784	*	6.69066	7.37194	5.35582	1.8092	7.51329e-08	1.31072e-05	Tyrobp	-13534
chr7	30431561	30432114	554	*	6.09886	6.75964	4.8441	1.70765	9.39898e-07	0.00012021	Nfkbid	8563
chr7	30456442	30458237	1796	*	6.90996	7.61708	5.46564	1.94474	8.3625e-09	1.93706e-06	Kirrel2	175
chr7	30477291	30478924	1634	*	7.06424	7.58907	6.23092	1.15297	0.000172297	0.0110862	Nphs1os	-12517
chr5	30524979	30527856	2878	*	7.78673	8.40143	6.69365	1.50279	3.95951e-06	0.000426039	Cib4	19418
chr5	30534142	30538680	4539	*	8.7376	9.34703	7.66161	1.48095	1.80827e-06	0.000214191	Cib4	9425
chr5	30549989	30551226	1238	*	6.44685	7.01741	5.48924	1.32203	2.23765e-05	0.0019437	Cib4	-4772
chr5	30576461	30579165	2705	*	8.09802	8.90425	6.10587	2.59242	8.94661e-12	5.25386e-09	Kcnk3	-10357
chr5	30581062	30582279	1218	*	6.3238	7.16641	4.04944	2.90439	6.28364e-12	3.91034e-09	Kcnk3	-6499
chr5	30585514	30589936	4423	*	9.57967	10.2076	8.44251	1.56082	4.04216e-07	5.75208e-05	Kcnk3	-445
chr5	30590763	30591871	1109	*	5.66849	6.46412	3.74802	2.50188	4.13904e-09	1.0992e-06	Gm9899	-2698
chr5	30593547	30595300	1754	*	6.67457	7.58326	3.64736	3.7196	3.79644e-15	8.45796e-12	Gm9899	-5805
chr5	30617676	30619379	1704	*	5.46678	6.09946	4.31336	1.5766	1.61852e-05	0.00145753	Mir5625	-29408
chr5	30621980	30623250	1271	*	6.64787	5.87304	7.14923	-1.47806	4.64705e-06	0.000492392	Mir5625	-25321
chr15	30813570	30814554	985	*	5.2284	5.82782	4.18416	1.43404	0.000123106	0.0083056	4930430F21Rik	-225064
chr17	30935953	30936686	734	*	4.74754	5.34603	3.70621	1.42786	0.000612777	0.0330951	Umodl1	-18363
chr3	31254315	31255370	1056	*	5.88567	6.45584	4.92914	1.31946	9.12251e-05	0.00650185	Slc7a14	55476
chr6	31305491	31307250	1760	*	6.5381	7.13164	5.51204	1.41342	6.98003e-06	0.000705524	2210408F21Rik	86020
chr3	31307676	31311236	3561	*	7.86872	8.74871	5.22166	3.31907	9.15042e-15	1.73419e-11	Slc7a14	863
chr6	31803091	31804702	1612	*	6.41954	7.30118	3.75336	3.33204	2.61319e-09	7.31247e-07	Gm13848	-137766
chr3	31902334	31903404	1071	*	5.4924	6.19981	4.04679	1.94162	2.18161e-07	3.3137e-05	Kcnmb2	166
chr3	31912042	31913058	1017	*	4.87432	5.50715	3.7204	1.57412	0.000127188	0.00852129	Kcnmb2	9847
chr3	31939619	31941123	1505	*	5.67785	6.50193	3.555	2.7302	6.91164e-09	1.68336e-06	Kcnmb2	37668
chr9	32292300	32293187	888	*	5.33596	5.89879	4.40039	1.28982	0.000678801	0.0361229	Kcnj5	51600
chr14	32309555	32310420	866	*	5.56638	6.20459	4.39374	1.60156	3.50936e-06	0.000383542	Ogdhl	-12031
chr14	32317604	32318462	859	*	5.51758	6.4014	2.82555	3.35056	1.33971e-12	1.06398e-09	Ogdhl	-3986
chr14	32320917	32324009	3093	*	8.26825	8.98694	6.77133	2.01051	2.98787e-09	8.25019e-07	Ogdhl	444
chr14	32462817	32465400	2584	*	8.26907	9.17666	5.25864	3.71002	1.66098e-15	4.77612e-12	Slc18a3	741
chr14	32465865	32469265	3401	*	7.15198	7.9932	4.88965	2.89476	5.19685e-13	4.92455e-10	Chat	-1656
chr14	32472946	32473786	841	*	5.60337	6.22303	4.49397	1.52032	1.27025e-05	0.00119689	Chat	-7457
chr14	32492319	32493913	1595	*	7.02494	7.55264	6.18423	1.16322	0.000116882	0.00797599	Ercc6	-20405
chr14	32596802	32600772	3971	*	9.60388	10.3085	8.17047	1.93369	1.23068e-09	3.85809e-07	Prrxl1	-621
chr6	32697534	32698508	975	*	5.74121	6.64751	2.75011	3.67068	2.51132e-12	1.83128e-09	Plxna4	-109829
chr6	32702098	32703058	961	*	5.58935	6.41293	3.47032	2.72561	2.56063e-10	9.49017e-08	Plxna4	-114386
chr6	32707835	32708482	648	*	4.34775	5.01942	3.05116	1.74953	0.000425372	0.024163	Plxna4	-119967
chr6	32712745	32714089	1345	*	5.77854	6.53416	4.09651	2.22581	9.76181e-08	1.65453e-05	Plxna4	-125225
chr6	32722344	32723854	1511	*	6.31618	7.13958	4.19855	2.7292	1.01485e-11	5.91799e-09	Plxna4	-134907
chr6	32727187	32729111	1925	*	6.6411	7.40249	4.92739	2.26682	4.9348e-10	1.69703e-07	Plxna4	-139957
chr11	32889218	32889963	746	*	5.20765	5.85657	3.99678	1.64878	1.29798e-05	0.00121479	Smim23	-64997
chr6	33126176	33127233	1058	*	6.51767	7.21381	5.12111	1.88517	6.04557e-08	1.09357e-05	Chchd3	-66445
chr6	33136241	33137670	1430	*	6.167	7.1007	2.69043	4.18143	1.08265e-15	3.34374e-12	Chchd3	-76696
chr3	33142186	33143801	1616	*	7.29794	7.95267	6.0658	1.6812	3.58754e-07	5.15795e-05	Pex5l	197
chr5	33430132	33436530	6399	*	8.83502	9.57668	7.22636	2.14551	1.61037e-09	4.8479e-07	Nkx1-1	759
chr5	33442752	33443510	759	*	5.81161	6.43855	4.6778	1.55256	1.03822e-05	0.00100436	Nkx1-1	-9041
chr11	33607358	33608403	1046	*	5.5217	6.10876	4.51537	1.38504	0.000143244	0.00949992	Gabrp	-28924
chr11	33732158	33733505	1348	*	6.68119	7.2556	5.7124	1.33733	5.73843e-06	0.000595177	Kcnip1	-52150
chr11	33748509	33749399	891	*	5.13438	5.80985	3.82283	1.77455	1.11611e-05	0.00106978	Kcnip1	-68272
chr11	33767181	33768062	882	*	5.58699	6.25733	4.29558	1.75191	3.35626e-06	0.000369229	Kcnip1	76064
chr11	33799527	33801111	1585	*	6.18782	6.85733	4.89966	1.74983	1.86556e-07	2.88087e-05	Kcnip1	43367
chr11	33843074	33843666	593	*	5.20025	5.75525	4.28661	1.25974	0.000362694	0.0210471	Kcnip1	316
chr11	33860830	33861820	991	*	5.6295	6.21661	4.62301	1.38552	6.82731e-05	0.00505615	Kcnip1	-17639
chr5	34276113	34276605	493	*	4.02546	4.71791	2.64458	1.85047	0.000506993	0.0282604	Zfyve28	11965
chr1	34578523	34580367	1845	*	7.51642	8.2406	5.99372	2.04095	6.60414e-09	1.63416e-06	Amer3	-248
chr7	34804970	34807415	2446	*	8.06522	8.58647	7.24104	1.14088	0.000192242	0.0122122	Chst8	6518
chr15	34816585	34818360	1776	*	7.3118	7.86746	6.39629	1.26607	1.77279e-05	0.00158447	Kcns2	-19882
chr15	34820585	34821522	938	*	5.25387	6.04832	3.34107	2.48979	4.14973e-08	7.72414e-06	Kcns2	-16301
chr15	34836907	34838620	1714	*	7.24326	7.73642	6.48809	1.04342	0.000496758	0.0277456	Kcns2	-285
chr14	34869000	34869504	505	*	3.92214	4.77534	1.55259	2.97053	2.60135e-06	0.000298546	Mir346	-25357
chr14	34896221	34896864	644	*	5.09234	5.73707	3.89656	1.62884	3.4142e-05	0.00278034	Mir346	1934
chr5	35278251	35281276	3026	*	7.72646	8.20796	6.99862	1.00474	0.000643965	0.0345489	Adra2c	1198
chr16	35301014	35301832	819	*	4.85723	5.69613	2.61465	2.85375	2.66945e-08	5.28747e-06	Sec22a	62495
chr12	35478602	35479690	1089	*	5.99522	5.53167	6.34549	-1.01561	0.000552674	0.0304808	Ahr	55843
chr11	35797429	35799849	2421	*	7.39343	8.02017	6.26032	1.55448	4.68919e-06	0.000496227	Fbll1	245
chr1	35973316	35974186	871	*	5.88351	5.17328	6.35733	-1.38476	1.68267e-05	0.00151203	Hs6st1	-94649
chr18	35974790	35975961	1172	*	6.39386	6.95617	5.45977	1.2902	2.81791e-05	0.00236578	Psd2	10546
chr14	36845173	36846485	1313	*	6.1763	6.71705	5.30133	1.20939	7.86353e-05	0.00574699	Ccser2	73706
chr5	36869084	36870310	1227	*	5.85248	6.58956	4.26692	2.11195	1.08283e-08	2.42731e-06	Ppp2r2c	1187
chr5	36899042	36900872	1831	*	7.13088	7.78957	5.88398	1.69967	1.09001e-07	1.82153e-05	Ppp2r2cos	-23078
chr18	36992256	36993271	1016	*	6.01215	6.64708	4.85093	1.58829	2.13804e-06	0.00024866	Pcdha8	297
chr18	36997798	36998403	606	*	4.94466	5.76893	2.82035	2.72446	4.0257e-08	7.52935e-06	Pcdha9	221
chr18	37005111	37005808	698	*	4.94695	5.68871	3.33778	2.13485	3.80582e-06	0.000412696	Pcdha10	140
chr5	37015264	37016502	1239	*	6.17584	7.05995	3.48043	3.36172	5.51237e-13	5.16484e-10	Wfs1	-26901
chr18	37019990	37020875	886	*	5.48304	6.17312	4.11206	1.85014	1.99682e-06	0.000233538	Pcdha12	203
chr18	37081748	37082273	526	*	4.65278	5.46001	2.65362	2.5797	3.85853e-07	5.50958e-05	Pcdhac1	-8125
chr18	37088719	37091514	2796	*	8.19025	8.90695	6.70257	1.99923	5.73722e-09	1.45417e-06	Pcdhac1	-19
chr5	37118062	37118993	932	*	5.44021	6.05333	4.35227	1.49188	2.62284e-05	0.00223407	Jakmip1	33292
chr18	37148657	37149650	994	*	5.33672	6.01868	3.99913	1.80828	2.95073e-06	0.00033028	Pcdhac2	5476
chr18	37150258	37151063	806	*	4.87138	5.53604	3.60188	1.72067	3.12184e-05	0.0025775	Pcdhac2	6983
chr5	37162925	37163838	914	*	5.7565	6.5404	3.91081	2.41673	1.04037e-08	2.35109e-06	Gm1043	10253
chr18	37216859	37218644	1786	*	7.91764	8.7096	6.02099	2.48256	4.36303e-11	2.10305e-08	Pcdhb1	-47246
chr1	37218049	37219299	1251	*	6.45403	7.13101	5.13644	1.78719	1.66029e-07	2.60244e-05	Cnga3	396
chr5	37227957	37229154	1198	*	6.54005	7.37289	4.34783	2.81419	4.54951e-12	3.04598e-09	Crmp1	-13502
chr1	37230671	37232049	1379	*	6.42604	6.97329	5.5336	1.23366	4.39885e-05	0.00348022	Cnga3	12155
chr19	37236954	37239882	2929	*	8.52	9.02327	7.74052	1.0784	0.000149216	0.00982771	4931408D14Rik	25677
chr5	37240288	37247040	6753	*	10.0193	10.9168	7.15289	3.55894	1.23946e-17	2.58394e-13	Crmp1	1606
chr5	37251548	37257651	6104	*	7.3814	8.18616	5.39941	2.57952	1.34688e-11	7.6405e-09	Crmp1	8836
chr5	37262890	37264795	1906	*	8.33302	9.19111	5.9169	3.06784	7.86814e-14	9.94116e-11	Crmp1	18079
chr5	37287816	37289855	2040	*	7.66987	8.33197	6.4101	1.71658	1.45931e-07	2.31791e-05	Crmp1	43072
chr14	37292198	37292767	570	*	4.90808	5.48794	3.92326	1.35392	0.000581828	0.031836	Ghitm	-157161
chr14	37315361	37316196	836	*	5.12849	5.8898	3.41524	2.25847	2.46317e-07	3.7076e-05	Ghitm	-180457
chr16	37337259	37338401	1143	*	5.71164	6.26231	4.80986	1.24507	0.000105223	0.00734261	Stxbp5l	47128
chr16	37372413	37373125	713	*	5.25487	5.92911	3.94818	1.76922	4.12383e-05	0.00328759	Stxbp5l	12189
chr8	37389002	37389755	754	*	4.3728	5.01721	3.17815	1.62298	0.000618531	0.0333158	G630064G18Rik	-365141
chr15	37533296	37535332	2037	*	6.55772	5.83515	7.03694	-1.4037	7.77514e-06	0.000777411	Ncald	-74932
chr18	38049686	38051411	1726	*	7.8553	8.63917	6.0098	2.42334	1.19973e-10	5.02534e-08	Arap3	-51580
chr18	38067370	38068923	1554	*	7.43409	8.07202	6.26244	1.60418	8.48881e-07	0.000109748	Arap3	-69178
chr18	38075732	38076494	763	*	4.63455	5.24508	3.55498	1.47708	0.000601732	0.0327104	Arap3	-77144
chr18	38103563	38105164	1602	*	5.75995	6.45699	4.35956	1.88751	2.51083e-07	3.77253e-05	Arap3	-105395
chr18	38163523	38164393	871	*	4.96036	5.54533	3.96034	1.37427	0.000536187	0.0296696	Pcdh1	45804
chr18	38170307	38171000	694	*	5.93985	6.61406	4.63328	1.77209	5.47831e-07	7.45237e-05	Pcdh1	39108
chr18	38215965	38217825	1861	*	7.77792	8.61457	5.55427	2.85329	4.01254e-13	4.08051e-10	Pcdh1	-7133
chr5	38318858	38320132	1275	*	5.95063	6.70755	4.26155	2.2352	4.41599e-09	1.15879e-06	Drd5	-14
chr5	38345957	38347876	1920	*	7.97842	8.67493	6.58026	1.88944	1.29419e-08	2.83259e-06	4930487D11Rik	2528
chr5	38350476	38351853	1378	*	5.88526	6.72075	3.67126	2.83414	7.34412e-11	3.26656e-08	4930487D11Rik	6776
chr5	38365310	38368014	2705	*	7.94771	8.54086	6.92288	1.41318	4.48099e-06	0.000476614	4930487D11Rik	22273
chr5	38388097	38389269	1173	*	5.7365	6.28334	4.84516	1.23082	0.000142104	0.00944216	4930487D11Rik	44294
chr2	38412304	38413819	1516	*	8.06433	8.7317	6.7844	1.74229	6.17937e-08	1.10578e-05	Lhx2	61754
chr5	38440445	38442176	1732	*	6.73843	7.24304	5.95566	1.082	0.000167306	0.0108063	Slc2a9	38995
chr5	38446115	38447331	1217	*	6.03287	6.81678	4.18708	2.4185	3.84006e-09	1.02634e-06	Slc2a9	33583
chr5	38543363	38545585	2223	*	6.97351	7.51964	6.08412	1.23017	8.05417e-05	0.00584184	Wdr1	17225
chr15	39187737	39188348	612	*	4.63076	5.37788	2.99391	2.16403	1.45477e-05	0.00133309	Rims2	-10243
chr15	39192124	39192896	773	*	5.6796	6.33681	4.43819	1.68938	3.14381e-06	0.000349546	Rims2	-5776
chr15	39196481	39199645	3165	*	9.4412	10.1621	7.93415	2.02346	8.74143e-10	2.84742e-07	Rims2	-223
chr15	39216881	39217729	849	*	6.14647	6.6465	5.37484	1.06561	0.00029232	0.0174365	Rims2	19019
chr3	39504789	39505640	852	*	5.9405	5.40594	6.32967	-1.12511	0.000742499	0.0389655	Fat4	618275
chr6	39908068	39909614	1547	*	7.17415	7.74677	6.21054	1.33092	7.95462e-06	0.000792506	Tmem178b	37405
chr5	39932875	39933496	622	*	4.66838	3.60577	5.27362	-1.86081	6.35258e-05	0.00475099	Hs3st1	-288555
chr6	40007690	40010638	2949	*	6.93359	7.42866	6.17387	1.04965	0.000315081	0.0186211	Tmem178b	-101089
chr6	40137725	40139127	1403	*	7.25391	7.74186	6.51106	1.02592	0.000576529	0.0316291	Tmem178b	28173
chr11	40600046	40601338	1293	*	5.26361	5.89391	4.11836	1.5652	4.10122e-05	0.00327269	Mat2b	91990
chr9	40871344	40874768	3425	*	7.37888	7.93353	6.46619	1.26229	3.14374e-05	0.00259301	Bsx	-1071
chr9	40876123	40879524	3402	*	7.71792	8.24651	6.87493	1.16684	0.000238814	0.0146108	Bsx	3697
chr10	41070681	41072753	2073	*	7.29882	8.10562	5.30271	2.59545	4.34339e-11	2.10305e-08	Gpr6	573
chr4	41526658	41528344	1687	*	6.03568	6.58431	5.13946	1.23821	4.32725e-05	0.00343008	Fam219aos	10064
chr4	41534807	41535611	805	*	6.14382	6.86462	4.63708	2.0187	3.68217e-08	6.99436e-06	Fam219aos	17772
chr4	41544231	41546963	2733	*	6.87769	7.46253	5.87807	1.37879	9.15998e-06	0.000896527	Fam219a	23930
chr4	41565278	41566783	1506	*	6.71994	7.23622	5.9083	1.12248	0.000161434	0.0104843	Fam219a	3496
chr4	41606776	41607235	460	*	4.21033	2.99816	4.85961	-2.04784	0.000126082	0.00846528	Enho	33296
chr19	41662799	41664869	2071	*	7.65486	8.20118	6.76493	1.23142	3.94834e-05	0.00317501	Mir8091	75183
chr19	42201483	42202517	1035	*	5.50867	6.1053	4.47312	1.42352	0.000120582	0.00816834	Sfrp5	252
chr19	42217341	42217992	652	*	5.21244	5.81352	4.163	1.4407	0.000105942	0.00738042	Sfrp5	-15415
chr19	42250265	42250742	478	*	4.01371	4.80091	2.14743	2.4181	2.14054e-05	0.00187104	Golga7b	2926
chr19	42255064	42259310	4247	*	9.21556	10.0788	6.74911	3.12432	1.00898e-14	1.82908e-11	Golga7b	1448
chr19	42268035	42269033	999	*	6.19172	6.89172	4.77857	1.9048	2.52738e-08	5.0541e-06	Mir3085	11636
chr19	42281686	42282173	488	*	4.44292	5.23412	2.5512	2.45536	2.98533e-06	0.000333705	Mir3085	-1760
chr19	42315451	42318720	3270	*	9.69982	10.3174	8.5973	1.51588	9.66966e-07	0.000123106	Mir3085	-36916
chr19	42330876	42333415	2540	*	6.74743	7.55603	4.73869	2.6082	4.47928e-11	2.14668e-08	Mir3085	-51976
chr19	42390719	42391807	1089	*	6.08138	6.94642	3.59625	3.1342	5.57633e-12	3.54965e-09	Crtac1	40231
chr18	42394110	42396328	2219	*	7.47388	8.19616	5.96018	2.03	6.78021e-09	1.66783e-06	Pou4f3	622
chr18	42398770	42399755	986	*	4.57412	5.20828	3.41561	1.57828	0.000430889	0.0244431	Pou4f3	4666
chr18	42400701	42402049	1349	*	5.49534	6.08514	4.48071	1.39572	0.000113508	0.00779328	Pou4f3	6778
chr19	42429256	42430078	823	*	5.34577	5.90442	4.42195	1.2739	0.000223895	0.0139124	Crtac1	1827
chr19	42430695	42433219	2525	*	7.64477	8.22187	6.6681	1.34882	4.77022e-05	0.00372806	Crtac1	-169
chr15	42483501	42484058	558	*	5.03584	4.26287	5.53643	-1.47107	0.000115926	0.00792374	Angpt1	193197
chr9	42612210	42613568	1359	*	6.20644	6.7175	5.40784	1.10362	0.000271865	0.0163332	Tbcel	-140631
chr13	42708872	42710648	1777	*	6.96085	7.78433	4.84263	2.73286	7.96145e-12	4.78763e-09	Phactr1	179
chr13	42725863	42726277	415	*	4.19777	4.91724	2.69726	1.9962	0.000115612	0.00791172	Phactr1	16489
chr19	43155704	43156573	870	*	6.22482	5.55845	6.67891	-1.32184	0.000109213	0.00755782	Hpse2	232216
chr18	43207321	43207951	631	*	4.86268	4.23202	5.30004	-1.26602	0.000955186	0.048099	Stk32a	-61
chr7	43480087	43483994	3908	*	8.94074	9.46208	8.11632	1.14149	0.00033995	0.0198795	Iglon5	8170
chr4	43566864	43567891	1028	*	6.26068	5.64609	6.69031	-1.24593	5.07162e-05	0.00391953	Creb3	4720
chr9	43568896	43569720	825	*	5.4283	6.12768	4.01781	1.89833	7.57824e-07	9.96754e-05	Nectin1	-174646
chr9	43570326	43572178	1853	*	7.1852	7.72729	6.30665	1.21548	0.000111155	0.00765406	Nectin1	-172702
chr9	43585287	43586647	1361	*	6.66612	7.34555	5.33875	1.79991	1.18229e-07	1.95615e-05	Nectin1	-157987
chr9	43619679	43622569	2891	*	7.27287	7.79716	6.44094	1.15122	9.95751e-05	0.00700124	Nectin1	-122830
chr9	43636375	43637926	1552	*	6.9713	7.56097	5.95711	1.39823	6.75441e-06	0.000685211	Nectin1	-106803
chr9	43657765	43661971	4207	*	7.71118	8.44082	6.1623	2.07278	7.36909e-09	1.74574e-06	Nectin1	-84086
chr9	43675458	43676824	1367	*	7.60124	8.16512	6.6627	1.29749	1.88649e-05	0.00167711	Nectin1	-67813
chr9	43680888	43682962	2075	*	7.67756	8.37223	6.28726	1.87949	1.22234e-07	2.00649e-05	Nectin1	-62029
chr9	43701538	43702503	966	*	4.87862	5.63118	3.21302	2.19957	2.67887e-06	0.000304759	Nectin1	-41933
chr9	43724003	43725978	1976	*	6.76493	7.26131	6.00208	1.05392	0.000227153	0.0140729	Nectin1	-18963
chr9	43929346	43930798	1453	*	5.3364	6.02506	3.97135	1.84203	3.40368e-06	0.000373952	Thy1	-113312
chr9	43944347	43946432	2086	*	8.66478	9.19742	7.81123	1.18183	0.000288217	0.0172535	Thy1	-97994
chr9	43947687	43948275	589	*	5.91416	6.48902	4.94402	1.33783	5.31359e-05	0.00407631	Thy1	-95403
chr9	43953007	43954311	1305	*	7.56003	8.12589	6.61584	1.30509	1.06823e-05	0.001031	Thy1	-89725
chr9	43965195	43966585	1391	*	6.46405	6.97911	5.65547	1.11791	0.000105839	0.00737941	Thy1	-77494
chr9	43969675	43973022	3348	*	7.77046	8.2771	6.98276	1.0897	0.000236287	0.01452	Thy1	-72035
chr4	44424820	44426337	1518	*	6.09435	6.72631	4.94343	1.5753	1.32396e-06	0.000163319	Melk	124662
chr4	44456605	44458304	1700	*	7.10454	7.73952	5.94318	1.59059	8.13466e-07	0.000105825	Mir5120	150113
chr4	44488440	44489361	922	*	5.09369	5.83343	3.49478	2.12326	6.07701e-07	8.21322e-05	Mir5120	118667
chr4	44490765	44491276	512	*	4.39526	5.16201	2.65139	2.28574	2.32314e-05	0.00201167	Mir5120	116547
chr4	44507968	44509093	1126	*	4.99414	5.70939	3.5131	1.98126	3.21347e-06	0.000355396	Mir5120	99037
chr4	44535620	44539766	4147	*	8.5196	9.0423	7.69173	1.14618	0.000107426	0.00746513	Mir5120	69875
chr4	44544745	44545843	1099	*	5.98389	6.65106	4.70478	1.73787	2.88039e-07	4.22875e-05	Mir5120	62274
chr7	44585951	44595207	9257	*	11.2374	11.8394	10.1849	1.45045	2.07518e-08	4.30465e-06	Kcnc3	-307
chr7	44602000	44607055	5056	*	8.62559	9.3515	7.09467	2.05196	5.61346e-09	1.42714e-06	Kcnc3	13642
chr7	44632934	44634144	1211	*	6.1365	6.6302	5.38005	1.04411	0.000398237	0.0228552	Myh14	31964
chr19	44692342	44693367	1026	*	6.14006	6.85147	4.67647	1.9662	3.28392e-08	6.38134e-06	Pax2	-53746
chr4	44694328	44695180	853	*	4.97835	5.61574	3.80855	1.59523	0.00023049	0.0142392	5730488B01Rik	-8046
chr4	44701391	44706416	5026	*	9.70047	10.2214	8.87711	1.14015	6.47948e-05	0.00482857	5730488B01Rik	1104
chr7	44754980	44756653	1674	*	7.37669	7.93563	6.45205	1.27852	1.57812e-05	0.00142852	Vrk3	7188
chr7	44769964	44770346	383	*	4.35108	2.49751	5.13625	-2.81402	2.45001e-07	3.69446e-05	Vrk3	21526
chr7	45360531	45363662	3132	*	8.91645	9.40624	8.16924	1.03276	0.000518945	0.0288495	Mtag2	-4064
chr9	45429635	45431893	2259	*	6.97162	7.48897	6.1573	1.12647	0.000188761	0.0120249	Dscaml1	411
chr9	45689988	45690772	785	*	5.36235	5.99452	4.21067	1.57378	1.74076e-05	0.00155752	Cep164	138283
chr9	45708901	45711760	2860	*	8.62602	9.38216	6.94115	2.236	1.28173e-10	5.23932e-08	Cep164	118332
chr11	46277407	46278875	1469	*	5.99935	5.34575	6.44752	-1.303	9.38495e-05	0.00666611	Cyfip2	34217
chr7	46395499	46399272	3774	*	9.58156	10.1446	8.64551	1.29486	1.00578e-05	0.000977515	Kcnc1	918
chr7	46407808	46410009	2202	*	7.42619	8.02298	6.39011	1.42766	1.72071e-05	0.00154288	Kcnc1	12441
chr13	46426440	46427342	903	*	5.25715	4.67539	5.67059	-1.19487	0.000539204	0.0297933	Rbm24	8591
chr4	46927840	46928731	892	*	6.16852	6.76758	5.12541	1.43521	6.39344e-06	0.000651763	Gabbr2	63428
chr4	46976434	46977671	1238	*	6.54002	7.21435	5.23297	1.77426	7.67282e-08	1.33298e-05	Gabbr2	14661
chr4	46981800	46982627	828	*	4.91481	5.58635	3.61869	1.75409	1.5177e-05	0.00138037	Gabbr2	9500
chr4	46989274	46993997	4724	*	9.69132	10.398	8.24882	1.94485	9.74324e-10	3.14914e-07	Gabbr2	78
chr19	47012617	47016902	4286	*	9.68678	10.4663	7.86757	2.39425	2.51181e-12	1.83128e-09	Ina	79
chr9	49338320	49341782	3463	*	7.86218	8.7111	5.53196	2.97205	4.35551e-13	4.27296e-10	Drd2	-352
chr9	49410022	49411143	1122	*	5.22299	5.996	3.44289	2.3369	3.65432e-08	6.95731e-06	Ankk1	16438
chr6	49764635	49765329	695	*	5.27296	4.40209	5.81218	-1.60778	7.68507e-05	0.00562643	Npy	-57728
chr10	49782215	49783885	1671	*	7.39026	7.97517	6.39042	1.37959	5.46209e-06	0.000568637	Grik2	4887
chr10	49788108	49789493	1386	*	7.05867	7.59546	6.1942	1.19604	4.70775e-05	0.00368615	Grik2	-35
chr7	49907011	49909151	2141	*	6.68073	7.30117	5.56876	1.52617	6.47295e-06	0.000659063	Slc6a5	-2218
chr7	49909806	49910741	936	*	5.24263	5.80069	4.32046	1.27137	0.00080042	0.0416383	Slc6a5	-25
chr7	49911092	49912462	1371	*	5.8136	6.48649	4.51221	1.76506	1.20276e-06	0.000150596	Slc6a5	77
chr1	51114819	51115287	469	*	4.75649	3.94977	5.2708	-1.51681	0.000155734	0.0101935	Cavin2	-174073
chr7	51624773	51627522	2750	*	6.22186	6.7839	5.28853	1.28885	4.86933e-05	0.00379484	Slc17a6	1511
chr5	52408356	52409490	1135	*	5.90084	6.49677	4.86743	1.42176	1.22375e-05	0.00115962	Gm3519	-32236
chr5	52409861	52410935	1075	*	5.35234	5.99518	4.16329	1.62162	2.52333e-05	0.00216257	Gm3519	-30761
chr9	52678023	52679731	1709	*	7.09225	7.93842	4.7866	2.94259	6.40899e-13	5.74666e-10	AI593442	560
chr15	53080892	53082498	1607	*	6.44398	5.8522	6.86242	-1.21227	5.16489e-05	0.00398423	Ext1	264488
chr9	53704874	53707536	2663	*	9.45243	10.2939	7.18759	2.90142	8.42249e-14	1.03286e-10	Rab39	27
chr4	53986476	53987389	914	*	6.61694	5.87654	7.10384	-1.42921	4.45e-06	0.000473922	Tmem38b	160888
chr1	53996157	53996708	552	*	5.62408	4.66887	6.19379	-1.72328	4.06697e-05	0.00325471	Mir7681	147009
chr19	54169793	54170997	1205	*	5.94584	6.57763	4.79549	1.57421	4.36848e-06	0.000465835	Adra2a	125136
chr19	54173967	54175231	1265	*	5.50402	6.19928	4.11121	1.87694	5.10924e-07	7.0306e-05	Adra2a	129340
chr13	54255764	54258658	2895	*	8.45346	9.00575	7.54727	1.25401	9.84937e-05	0.0069369	Cplx2	-45345
chr13	54262049	54267349	5301	*	9.11285	9.65953	8.22194	1.23332	5.52902e-05	0.00421444	Cplx2	-37857
chr9	54278959	54279709	751	*	5.39148	6.04765	4.15395	1.68333	6.02756e-06	0.000621301	Gldn	-7152
chr9	54286079	54287456	1378	*	6.5194	7.20763	5.15609	1.84421	5.54795e-08	1.01234e-05	Gldn	282
chr13	54294798	54296574	1777	*	7.1626	7.70764	6.27614	1.22634	9.42747e-05	0.00669062	Cplx2	-6870
chr13	54308859	54313566	4708	*	8.6867	9.20473	7.87067	1.12974	0.000509984	0.0284082	Cplx2	8657
chr13	54315899	54318024	2126	*	6.0281	6.60018	5.06608	1.32713	2.22206e-05	0.00193621	Cplx2	14406
chr13	54360904	54362667	1764	*	6.39173	7.15772	4.65217	2.29632	4.69451e-10	1.63759e-07	Cplx2	-9563
chr13	54363955	54365466	1512	*	6.04474	6.79826	4.37407	2.21379	1.31592e-09	4.07931e-07	Cplx2	-6638
chr13	54366130	54368497	2368	*	7.29404	8.03597	5.68399	2.14552	4.91516e-10	1.69703e-07	Cplx2	-4035
chr13	54370165	54374683	4519	*	9.73718	10.2886	8.83325	1.25123	6.19974e-06	0.000635905	Cplx2	1075
chr13	54383636	54385659	2024	*	6.53191	7.21929	5.17212	1.83988	3.79221e-08	7.15449e-06	Cplx2	13299
chr13	54386548	54387480	933	*	5.52007	6.14867	4.38064	1.55875	7.50382e-06	0.000753899	Cplx2	15665
chr13	54716518	54718945	2428	*	8.64967	9.30986	7.39712	1.7081	3.07484e-07	4.48265e-05	Cdhr2	16269
chr13	54725926	54726534	609	*	4.19353	4.89746	2.76331	1.91197	0.000183952	0.0117725	Gprin1	23644
chr13	54745561	54746408	848	*	5.03047	5.88352	2.66228	2.99338	5.90845e-09	1.48403e-06	Gprin1	3889
chr13	54746747	54748033	1287	*	6.48191	7.30641	4.35578	2.73975	5.3876e-12	3.4559e-09	Gprin1	2484
chr13	54748863	54751139	2277	*	8.86428	9.57421	7.40739	1.96215	4.41899e-09	1.15879e-06	Gprin1	-127
chr13	54752058	54755067	3010	*	7.9938	8.85062	5.58989	3.05376	7.26079e-13	6.37337e-10	Gprin1	-3689
chr13	54756915	54761108	4194	*	9.75745	10.4058	8.54867	1.65288	8.75541e-08	1.49919e-05	Sncb	7583
chr13	54764436	54767215	2780	*	8.30461	8.82088	7.49302	1.12342	0.000217105	0.0135612	Sncb	769
chr13	54780148	54781448	1301	*	7.5018	8.14779	6.30149	1.64092	3.21116e-07	4.67322e-05	Eif4e1b	-3200
chr13	54794364	54795544	1181	*	6.66044	7.17074	5.86372	1.10155	0.000122244	0.00825406	Tspan17	5549
chr13	54805524	54807307	1784	*	6.11918	6.61829	5.34978	1.0624	0.000336753	0.0197201	Tspan17	17011
chr13	54837410	54838098	689	*	5.11898	5.69598	4.14261	1.34372	0.000318267	0.0187827	Tspan17	48349
chr13	54871362	54873277	1916	*	7.80949	8.30509	7.04851	1.05198	0.000245265	0.0149397	Unc5a	-77091
chr13	54877491	54880907	3417	*	8.11422	8.68374	7.15956	1.31953	1.40232e-05	0.00129643	Unc5a	-70212
chr13	54885123	54889379	4257	*	7.41535	7.98874	6.4495	1.33415	1.18561e-05	0.00112861	Unc5a	-62160
chr13	54911165	54913176	2012	*	7.13009	7.61742	6.38867	1.0238	0.000824629	0.042579	Unc5a	-37240
chr13	54917988	54919793	1806	*	7.51338	8.12952	6.41558	1.50873	9.55296e-07	0.000121993	Unc5a	-30520
chr13	54945832	54947209	1378	*	6.15185	6.8377	4.7984	1.831	5.35803e-07	7.3246e-05	Unc5a	-2890
chr13	54958725	54960855	2131	*	6.70945	7.4074	5.30516	1.89525	1.29874e-07	2.11112e-05	Unc5a	10379
chr6	55455984	55456614	631	*	4.66745	5.32601	3.42101	1.69043	0.000106292	0.00739249	Adcyap1r1	4321
chr12	55565242	55566176	935	*	5.23846	5.80153	4.30222	1.29036	0.000477443	0.0268403	Aldoart2	504
chr12	55598331	55601053	2723	*	9.0705	9.61088	8.19653	1.21008	0.000136745	0.00909329	Insm2	775
chr11	55607201	55608003	803	*	5.4424	5.98609	4.55956	1.21863	0.000319329	0.0188187	Glra1	596
chr17	56233546	56234595	1050	*	5.91588	6.69081	4.12453	2.35457	1.90524e-09	5.53574e-07	A230051N06Rik	-7645
chr17	56240894	56242704	1811	*	8.56018	9.35334	6.65579	2.49224	5.31414e-12	3.4352e-09	A230051N06Rik	83
chr17	56251260	56252079	820	*	5.76493	6.2716	4.97715	1.0877	0.000484983	0.0272338	Fem1a	-5123
chr9	56645873	56647469	1597	*	6.92559	7.49467	5.97222	1.31692	3.07179e-05	0.00254626	Lingo1	-11023
chr9	56665895	56668337	2443	*	7.57575	8.12981	6.66467	1.26023	2.12939e-05	0.00186325	Lingo1	-31468
chr9	56682038	56682783	746	*	5.12119	5.74891	3.98474	1.55343	7.01703e-05	0.00519204	Lingo1	-46763
chr9	56731307	56731953	647	*	4.9174	5.48881	3.95731	1.32097	0.000708121	0.0374591	Lingo1	64680
chr9	56735252	56736390	1139	*	5.3124	6.04676	3.74037	2.09268	3.75721e-07	5.38626e-05	Lingo1	60489
chr9	56738262	56738833	572	*	4.58763	3.72877	5.12229	-1.58803	0.000164149	0.0106275	Lingo1	57762
chr9	56739309	56739990	682	*	4.77249	5.57109	2.83233	2.51654	1.82795e-06	0.000215908	Lingo1	56660
chr9	56744220	56744899	680	*	4.43653	5.13949	3.01051	1.90956	0.000361392	0.0210008	Lingo1	51750
chr9	56757284	56758942	1659	*	6.9295	7.46778	6.06112	1.2013	0.000120997	0.00818342	Lingo1	38197
chr16	56872862	56873959	1098	*	5.87116	5.35165	6.25233	-1.10221	0.000590774	0.0322409	Tmem45a	12752
chr13	56890111	56891119	1009	*	5.66643	6.48734	3.5678	2.70329	1.76552e-10	6.81596e-08	Trpc7	5174
chr13	56891899	56892935	1037	*	5.19796	6.00835	3.17652	2.61238	1.57726e-08	3.37247e-06	Trpc7	3372
chr13	56894388	56895954	1567	*	5.97375	6.57697	4.91756	1.45189	1.09832e-05	0.00105638	Trpc7	618
chr13	56936632	56938009	1378	*	6.82854	7.3106	6.09941	1.00601	0.000408125	0.023315	Trpc7	-41532
chr9	57466461	57469269	2809	*	9.5526	10.0437	8.80243	1.03709	0.00014659	0.00968618	Scamp5	195
chr7	57589980	57592772	2793	*	8.61	9.43506	6.4796	2.74992	3.22208e-13	3.40109e-10	Gabrb3	203
chr7	57596905	57598112	1208	*	5.34656	6.13067	3.49957	2.41436	2.94712e-07	4.31154e-05	Gabrb3	6336
chr9	57603884	57607348	3465	*	8.65771	9.41826	6.94871	2.26453	7.13309e-11	3.21525e-08	Cplx3	665
chr7	57700041	57701006	966	*	5.1395	6.01639	2.52759	3.2581	7.02281e-10	2.3425e-07	Gabrb3	109351
chr7	57703092	57704262	1171	*	6.41934	7.33329	3.30905	3.80397	3.66318e-14	5.09115e-11	Gabrb3	112504
chr7	57711499	57712551	1053	*	5.39475	6.29226	2.52863	3.53407	1.70899e-11	9.37571e-09	Gabrb3	120852
chr7	57768734	57769503	770	*	4.67432	5.45365	2.85658	2.37499	1.14208e-06	0.000143863	Gabrb3	177946
chr7	57806264	57807175	912	*	5.72759	6.60009	3.16416	3.21478	6.94976e-12	4.29284e-09	Gabrb3	215547
chr9	58065609	58067180	1572	*	5.93734	6.48185	5.0523	1.22269	8.40034e-05	0.0060649	Gm16130	34121
chr15	58286903	58287638	736	*	4.8379	4.02216	5.35582	-1.53011	0.000183522	0.011754	Klhl38	36898
chr4	59219390	59220381	992	*	5.27713	5.8649	4.26865	1.38716	0.000182494	0.0116972	Ugcg	30336
chr9	59576705	59579270	2566	*	9.56004	10.0666	8.77246	1.09001	6.54673e-05	0.00486998	Celf6	-349
chr9	59589118	59590707	1590	*	6.08637	6.64202	5.1709	1.26443	4.57879e-05	0.0036123	Celf6	625
chr19	60463493	60464821	1329	*	6.72598	7.38015	5.4959	1.67781	1.58643e-06	0.000191172	Prlhr	4147
chr19	60466618	60469553	2936	*	8.14413	8.80302	6.89649	1.70161	1.25359e-06	0.000156114	Prlhr	218
chr10	60912847	60914600	1754	*	7.90782	8.63843	6.3542	2.07875	5.81312e-09	1.4645e-06	Mir6408	-9299
chr10	60985125	60985428	304	*	4.66695	5.31304	3.4663	1.63268	0.000115358	0.00790433	Mir466j	24554
chr9	61476268	61477329	1062	*	6.33633	6.97241	5.17112	1.59428	2.92192e-06	0.000327935	Tle3	104433
chr9	61482865	61484086	1222	*	5.49325	6.19745	4.06182	1.9243	4.66136e-07	6.47844e-05	Tle3	111110
chr9	61484537	61486002	1466	*	6.57391	7.11093	5.70888	1.19629	0.000101523	0.0071142	Tle3	112904
chr9	63150930	63151895	966	*	6.19091	4.80064	6.88557	-2.28345	2.50641e-10	9.33067e-08	Skor1	-2452
chr9	63152311	63153718	1408	*	6.58895	7.34679	4.89481	2.24357	2.63072e-10	9.66402e-08	Skor1	-4054
chr2	63183546	63185239	1694	*	6.2625	7.02504	4.54238	2.27315	7.05334e-10	2.34331e-07	Kcnh7	-106
chr7	63200974	63202817	1844	*	7.06416	7.60731	6.18281	1.21923	3.20444e-05	0.00263266	Chrna7	10630
chr7	63209368	63210229	862	*	5.51678	6.04942	4.66326	1.17835	0.000853857	0.0439204	Chrna7	2727
chr7	63443825	63445972	2148	*	7.81658	8.44219	6.6873	1.54988	3.47336e-06	0.000380605	Otud7a	127
chr14	63580705	63582425	1721	*	6.47312	7.33665	4.00326	3.12004	1.47351e-12	1.1592e-09	Xkr6	-24965
chr14	63585887	63586982	1096	*	5.37246	6.18853	3.30999	2.66024	1.33419e-09	4.12062e-07	Xkr6	-20095
chr14	63605606	63607545	1940	*	8.49033	8.98755	7.72548	1.05771	0.000222462	0.013844	Xkr6	46
chr14	63680198	63680965	768	*	4.56962	5.47449	1.59958	3.62359	7.55255e-09	1.78146e-06	Mir598	-46607
chr14	63694860	63696440	1581	*	6.44429	7.38068	2.90916	4.24651	8.709e-15	1.72913e-11	Mir598	-31539
chr14	63698618	63699795	1178	*	6.34338	7.28756	2.62366	4.43371	9.5063e-16	3.17088e-12	Mir598	-27982
chr14	63705162	63705768	607	*	4.55795	5.48705	1.17576	4.03897	6.71568e-10	2.24905e-07	Mir598	-21724
chr14	63711083	63716245	5163	*	8.75757	9.70347	4.99355	4.5008	1.24928e-16	1.04176e-12	Mir598	-13525
chr14	63729364	63731521	2158	*	7.70101	8.63463	4.22607	4.19616	2.51064e-17	3.48932e-13	Mir598	3254
chr14	63732801	63733726	926	*	4.62127	5.38016	2.92141	2.23691	3.3533e-06	0.000369229	Mir598	6075
chr14	63739859	63740781	923	*	5.25438	6.14665	2.45763	3.45758	1.43066e-11	7.92102e-09	Mir598	13131
chr14	63742581	63744858	2278	*	8.03694	8.97005	4.5729	4.18652	8.61495e-17	7.98213e-13	Mir598	16531
chr14	63759598	63760389	792	*	5.22856	5.9547	3.69655	2.04455	1.43064e-06	0.00017467	Mir598	32805
chr14	63776082	63778316	2235	*	6.8546	7.55255	5.45033	1.89546	7.191e-09	1.73788e-06	Mir598	50010
chr18	64265151	64266899	1749	*	6.58825	7.43566	4.27164	2.95247	1.74966e-13	1.94536e-10	St8sia3os	11155
chr18	64349840	64351000	1161	*	5.3225	5.86271	4.44897	1.20549	0.00047725	0.0268403	Onecut2	10056
chr9	64527759	64529639	1881	*	8.29619	8.96465	7.0121	1.7477	7.81127e-07	0.000102417	Megf11	143073
chr9	64670627	64671787	1161	*	6.13267	6.76125	4.99331	1.56061	5.01063e-06	0.000525574	Rab11a	66549
chr8	64983286	64983974	689	*	4.94457	4.32335	5.37741	-1.25228	0.000925148	0.0469551	Trim75	4014
chr14	65052585	65053528	944	*	5.03667	5.73874	3.61458	1.91	8.6712e-06	0.000855719	Extl3	45049
chr14	65059575	65060748	1174	*	6.80199	7.46732	5.52993	1.73093	1.34252e-07	2.1696e-05	Extl3	37944
chr14	65119375	65120832	1458	*	6.51885	7.12308	5.45946	1.45724	3.20367e-06	0.000354782	Extl3	-21998
chr14	65121408	65122443	1036	*	5.31146	5.87587	4.37142	1.29573	0.000250227	0.0151975	Extl3	-23820
chr11	66167720	66168692	973	*	6.69743	7.24772	5.79671	1.24535	6.04068e-05	0.00456274	Gm12296	171
chr5	66307698	66308919	1222	*	5.24444	4.54962	5.71142	-1.36072	0.00067284	0.0358744	Apbb2	29356
chr11	66366829	66367963	1135	*	5.87671	6.48861	4.79272	1.48811	1.18104e-05	0.00112555	Shisa6	158730
chr11	66369065	66370800	1736	*	8.57641	9.16734	7.55834	1.40451	3.11559e-05	0.00257488	Shisa6	156193
chr11	66377443	66378041	599	*	4.91887	5.6026	3.5741	1.81457	2.11224e-05	0.00185213	Shisa6	148384
chr4	66402073	66405352	3280	*	7.61007	8.13283	6.78207	1.14598	0.000103858	0.0072595	Astn2	770
chr1	66467265	66470057	2793	*	8.7637	9.51022	7.12997	2.17538	3.06225e-10	1.10545e-07	Unc80	727
chr11	66524052	66528284	4233	*	8.61629	9.17319	7.69736	1.27141	3.27227e-05	0.00268046	Shisa6	-42
chr14	66909200	66912712	3513	*	9.04294	9.76611	7.52502	2.03647	6.72564e-09	1.6593e-06	Pnma2	-252
chr7	68038743	68039373	631	*	5.03271	5.59204	4.10698	1.27539	0.000714443	0.0377306	Igf1r	86801
chr14	68083866	68084819	954	*	4.67824	5.30893	3.53166	1.56354	0.000449238	0.0254321	Nefl	480
chr14	68123358	68126029	2672	*	8.31193	9.08461	6.53375	2.34547	1.27222e-10	5.22606e-08	Nefm	310
chr14	68126673	68127542	870	*	5.10561	5.95983	2.72638	3.00834	1.76867e-09	5.24867e-07	Nefm	-2104
chr4	68952531	68955518	2988	*	7.61513	8.51709	4.68721	3.62005	1.1265e-14	1.92733e-11	Brinp1	372
chr18	69243429	69244005	577	*	4.30863	3.22994	4.91889	-1.87866	0.000104235	0.00727976	Tcf4	-100775
chr17	69429915	69431517	1603	*	6.85133	7.73016	4.21747	3.30048	3.29285e-14	4.65403e-11	Akain1	-8610
chr17	69437976	69441960	3985	*	9.58098	10.3371	7.89628	2.23632	5.64748e-11	2.63094e-08	Akain1	642
chr17	69466480	69467917	1438	*	6.4932	7.39115	3.62108	3.55351	4.61514e-15	9.62129e-12	Akain1	27873
chr17	69474982	69476423	1442	*	8.03073	8.56269	7.17897	1.17913	8.74944e-05	0.00627821	Akain1	36377
chr12	69907239	69909078	1840	*	8.64193	9.23481	7.61793	1.4124	7.19963e-06	0.000725961	Map4k5	-14996
chr17	69968378	69970909	2532	*	8.76631	9.3973	7.61871	1.57408	9.23427e-07	0.000118467	Dlgap1	571
chr2	70560367	70564355	3989	*	7.86265	8.50256	6.68402	1.6135	4.62851e-07	6.44351e-05	Gad1	232
chr2	70566550	70570093	3544	*	7.7406	8.22458	7.007	1.01298	0.000980461	0.0491344	Gad1os	-4965
chr10	70598249	70600282	2034	*	7.76111	8.30842	6.86848	1.23518	9.02631e-05	0.00643879	Phyhipl	25
chr7	70643739	70644767	1029	*	6.1837	5.57038	6.61271	-1.24394	4.61236e-05	0.00362849	Nr2f2	-277507
chr10	71409383	71410708	1326	*	6.00827	6.7423	4.43786	2.09465	6.8531e-09	1.67588e-06	Ipmk	62283
chr11	71439518	71440829	1312	*	6.492	7.13444	5.30439	1.62329	4.85808e-07	6.71825e-05	9230020A06Rik	-76362
chr8	71653292	71656261	2970	*	6.58009	7.20958	5.43761	1.56552	1.74724e-06	0.000208441	Unc13a	16980
chr8	71664589	71667474	2886	*	7.58435	8.32732	5.969	2.15229	5.15681e-09	1.32314e-06	Unc13a	5725
chr8	71668234	71672778	4545	*	9.63831	10.22	8.6481	1.36769	2.21754e-06	0.000257188	Unc13a	1251
chr8	71675390	71677609	2220	*	7.78649	8.38785	6.73616	1.44675	3.95659e-06	0.000426039	Jak3	117
chr8	71678679	71680047	1369	*	7.22616	7.86421	6.05405	1.60453	5.71641e-07	7.75098e-05	Jak3	2980
chr8	71680408	71682623	2216	*	7.11075	7.68822	6.13299	1.34986	1.23998e-05	0.00117234	Jak3	5133
chr8	71683843	71690860	7018	*	8.6573	9.33869	7.32204	1.81195	3.92601e-08	7.37356e-06	Insl3	-1900
chr8	71691961	71694247	2287	*	7.03395	7.67424	5.85397	1.61435	4.59209e-07	6.425e-05	Insl3	3852
chr8	71698772	71701798	3027	*	7.90868	8.46494	6.99152	1.2687	2.38982e-05	0.00206727	B3gnt3	1515
chr8	71708776	71710587	1812	*	7.09435	7.65393	6.16793	1.2807	6.44641e-05	0.00481253	B3gnt3	-7882
chr8	71724453	71726273	1821	*	5.9873	6.4997	5.18536	1.10792	0.00036577	0.0212108	Fcho1	318
chr8	71728052	71729352	1301	*	6.26729	6.98138	4.79155	1.98144	1.37149e-08	2.97831e-06	Fcho1	-3021
chr17	71782286	71783527	1242	*	6.42671	6.91275	5.68831	1.01891	0.000985111	0.0492195	Clip4	960
chr15	71958057	71959117	1061	*	5.95141	6.46178	5.15452	1.10083	0.000878724	0.0449546	Col22a1	75640
chr15	72205909	72206557	649	*	5.23083	5.76016	4.38592	1.16577	0.000890016	0.0453652	Col22a1	-172006
chr15	72207912	72208606	695	*	4.84963	5.56435	3.37106	1.97763	2.85793e-05	0.00239037	Col22a1	-174032
chr1	72535214	72537526	2313	*	7.54565	8.19882	6.31925	1.67418	6.00466e-07	8.12861e-05	2024-03-04	789
chr1	72538077	72538899	823	*	4.76324	5.72879	0.357913	5.0428	3.32399e-11	1.69015e-08	2024-03-04	-1329
chr15	72545773	72547764	1992	*	6.32363	7.13468	4.29747	2.62605	1.2636e-10	5.21636e-08	Kcnk9	930
chr15	72548771	72550410	1640	*	7.79478	8.46057	6.52097	1.73439	6.14156e-08	1.10375e-05	Kcnk9	-1892
chr17	72579502	72580612	1111	*	6.02715	6.86501	3.79335	2.85702	6.23782e-11	2.87002e-08	Alk	24250
chr17	72601023	72606623	5601	*	9.66427	10.5273	7.19919	3.12319	1.87008e-15	5.19814e-12	Alk	484
chr15	72642781	72645499	2719	*	6.96287	7.59227	5.8207	1.56564	6.36738e-07	8.55024e-05	Kcnk9	-96441
chr15	72655139	72655885	747	*	5.11079	5.73014	4.00242	1.51703	0.00028943	0.0172889	Kcnk9	-107813
chr15	72662321	72663197	877	*	5.60665	6.22527	4.50067	1.51572	2.01854e-05	0.0017812	Kcnk9	-115060
chr15	72708253	72709252	1000	*	5.0952	5.72407	3.95486	1.55828	0.000173158	0.011133	Peg13	101571
chr14	73409859	73410965	1107	*	6.06229	5.45795	6.48691	-1.2304	0.000109746	0.00757667	Itm2b	-25123
chr15	73839129	73840583	1455	*	6.66643	7.20057	5.80895	1.186	5.49609e-05	0.00419317	Mroh5	-185
chr15	73886306	73887912	1607	*	7.3302	7.97085	6.14893	1.61637	4.12073e-07	5.84966e-05	Mroh5	-47438
chr15	73890667	73891340	674	*	5.19921	5.85727	3.95468	1.69097	2.6816e-05	0.00227427	Mroh5	-51333
chr15	73952165	73953349	1185	*	5.6669	6.4927	3.53078	2.7454	2.27196e-08	4.62089e-06	Mroh5	-113086
chr15	73955586	73957104	1519	*	6.66959	7.5585	3.91548	3.42862	3.95042e-13	4.06694e-10	Mroh5	-116674
chr15	73981613	73983141	1529	*	6.10717	6.7915	4.75996	1.8231	1.19377e-07	1.97123e-05	Mroh5	-142706
chr15	73996983	73998157	1175	*	5.70225	6.2318	4.85676	1.16784	0.000870575	0.0445924	Mroh5	-157899
chr15	74027641	74028250	610	*	4.67655	5.47625	2.72907	2.52209	1.16391e-06	0.000146171	Mroh5	-188275
chr15	74048747	74050875	2129	*	8.21018	9.06916	5.7855	3.07705	1.37544e-13	1.61544e-10	Mroh5	-210140
chr15	74052635	74053453	819	*	5.16684	6.0081	2.90418	2.88072	3.62534e-09	9.78362e-07	Mroh5	-213373
chr15	74054500	74056695	2196	*	7.30975	8.22348	4.20304	3.80781	3.81153e-15	8.45796e-12	Mroh5	-215927
chr15	74561908	74565294	3387	*	8.7269	9.22153	7.96823	1.04901	0.000323665	0.0190608	Adgrb1	47405
chr11	74569709	74570213	505	*	4.49362	5.12483	3.34528	1.5643	0.000655126	0.0350419	Rap1gap2	-10934
chr11	74589385	74590931	1547	*	6.08532	6.8464	4.37335	2.26253	3.44006e-09	9.37461e-07	Rap1gap2	28
chr11	74610067	74611677	1611	*	7.92767	8.62129	6.54181	1.87424	4.19964e-08	7.79965e-06	Rap1gap2	43
chr11	74618774	74621378	2605	*	7.74351	8.57004	5.60169	2.7615	9.80674e-13	8.17774e-10	Ccdc92b	471
chr11	74622533	74625043	2511	*	8.29758	9.06534	6.54791	2.31207	7.11102e-11	3.21525e-08	Ccdc92b	4183
chr2	74708277	74709162	886	*	6.05205	5.42048	6.48984	-1.27077	0.000154242	0.0101038	Hoxd8	3231
chr1	74853870	74856782	2913	*	9.18657	9.71322	8.34855	1.16045	5.64554e-05	0.00429148	Cdk5r2	297
chr1	74857485	74860121	2637	*	8.81088	9.55172	7.20641	2.1405	3.80333e-09	1.01979e-06	Cdk5r2	3774
chr1	74880582	74885033	4452	*	8.49123	9.00329	7.69011	1.1088	0.000145304	0.00961648	Fev	2600
chr1	74885805	74886899	1095	*	4.86223	5.51403	3.64086	1.65964	0.000135698	0.00905257	Fev	-944
chr1	74891243	74895655	4413	*	9.14061	9.80282	7.88045	1.71794	1.24539e-07	2.0403e-05	Cryba2	-306
chr1	74899297	74902313	3017	*	7.51147	8.06837	6.59251	1.2709	2.73692e-05	0.00231001	Mir375	-84
chr1	74915586	74916175	590	*	4.67423	5.38593	3.20934	1.95927	1.43701e-05	0.00132263	Mir375	-15160
chr1	74947576	74952647	5072	*	8.89318	9.43336	8.01973	1.20932	2.85589e-05	0.00239037	Ihh	1560
chr9	75087813	75088114	302	*	4.08644	3.03889	4.68691	-1.83516	0.000251753	0.0152568	Myo5a	16758
chr13	75089415	75091345	1931	*	6.72971	7.34568	5.6325	1.50705	2.24747e-06	0.000260297	Pcsk1	523
chr1	75243560	75246701	3142	*	7.63582	8.22275	6.62988	1.38789	6.53623e-06	0.000664226	Dnajb2	8429
chr1	75262096	75265224	3129	*	8.59728	9.49706	5.7	3.59017	5.61386e-16	2.22921e-12	Ptprn	111
chr1	75277365	75279012	1648	*	6.47954	7.2868	4.48024	2.59633	1.43433e-11	7.92102e-09	Resp18	226
chr1	75289045	75291929	2885	*	6.7099	7.39898	5.34307	1.84895	2.48729e-08	4.98588e-06	Resp18	-12072
chr14	75369541	75370696	1156	*	6.22782	6.76514	5.36199	1.19691	0.000305546	0.0181218	Mir466f-3	18027
chr14	75402501	75403256	756	*	5.72835	6.3147	4.72416	1.38267	4.60699e-05	0.00362769	Mir466f-3	-14733
chr14	75454956	75457684	2729	*	7.52238	8.08266	6.59398	1.28372	2.84835e-05	0.00238714	Siah3	338
chr14	75472845	75474606	1762	*	7.83121	8.39505	6.8928	1.29748	3.92602e-05	0.00316316	Siah3	17744
chr1	75485623	75489299	3677	*	9.91174	10.4711	8.98585	1.28115	7.59126e-06	0.000761766	Tmem198	7929
chr9	75683342	75684993	1652	*	8.23295	9.19406	4.00038	4.97947	1.16204e-19	3.23005e-15	Scg3	-112
chr3	76073880	76074771	892	*	5.75836	6.52734	4.00168	2.31329	1.72253e-09	5.1484e-07	Fstl5	-235
chr15	76513817	76516036	2220	*	6.97091	7.82961	4.54884	3.07052	2.99431e-14	4.38057e-11	Dgat1	-2933
chr15	76516735	76522264	5530	*	9.1636	9.95408	7.2765	2.47276	7.83097e-11	3.43693e-08	Scrt1	2629
chr15	76522547	76524751	2205	*	9.56519	10.1781	8.478	1.49584	8.23778e-07	0.000106976	Scrt1	-1520
chr15	76532985	76535411	2427	*	8.25353	8.84873	7.22239	1.4217	1.05928e-05	0.00102355	Fbxl6	4548
chr18	76846287	76848387	2101	*	6.60213	7.34657	4.97921	2.15924	5.77167e-10	1.94619e-07	Skor2	-9068
chr18	76855548	76856520	973	*	5.27311	6.0915	3.19345	2.67855	1.80972e-09	5.33254e-07	Skor2	-371
chr18	76858976	76860519	1544	*	6.15594	6.69044	5.29753	1.18655	8.3142e-05	0.00600791	Skor2	3343
chr10	76872817	76874992	2176	*	7.08385	7.58904	6.29968	1.08428	0.000237389	0.0145556	Pcbp3	-51093
chr10	76956363	76957760	1398	*	6.02955	6.71442	4.68015	1.82566	1.14448e-07	1.90492e-05	Pcbp3	4885
chr10	76997360	76998388	1029	*	6.22657	6.78756	5.2962	1.28493	2.74713e-05	0.00231628	Gm10787	-14121
chr14	77194239	77198163	3925	*	7.70917	8.27063	6.77746	1.28832	4.08699e-05	0.00326446	Enox1	39438
chr6	77430356	77431001	646	*	4.72342	5.37471	3.50391	1.65687	0.000110128	0.00758962	6330415B21Rik	-48204
chr11	77875920	77877038	1119	*	5.86477	6.36621	5.08973	1.06992	0.000763245	0.0399537	Pipox	17393
chr11	77927976	77928732	757	*	4.47048	5.22558	2.79125	2.21063	1.34733e-05	0.00125533	Gm11190	934
chr11	77930253	77932828	2576	*	8.89323	9.51345	7.78196	1.52705	1.32792e-06	0.000163566	Sez6	702
chr11	77933625	77935141	1517	*	6.37349	7.21135	4.13972	2.85942	1.15017e-12	9.40313e-10	Sez6	3544
chr6	77950889	77951655	767	*	4.93484	5.59658	3.67643	1.70754	4.22729e-05	0.00336685	Ctnna2	28395
chr11	77957827	77959082	1256	*	5.51777	6.11513	4.47994	1.42646	3.43268e-05	0.00279266	Phf12	-24361
chr11	77965145	77967694	2550	*	7.72447	8.24642	6.89852	1.1432	0.000160645	0.0104493	Phf12	-16396
chr6	77978336	77980849	2514	*	8.87297	9.42042	7.97998	1.23612	8.50294e-05	0.00612307	Ctnna2	74
chr15	77981243	77983405	2163	*	8.41267	8.91408	7.6377	1.072	0.000690868	0.0366714	Eif3d	-11500
chr15	78035693	78037518	1826	*	7.54018	8.27596	5.96113	2.10885	4.48213e-09	1.168e-06	Eif3d	-65782
chr15	78044605	78046675	2071	*	7.57113	8.47076	4.67582	3.58484	3.23145e-14	4.64599e-11	Cacng2	73640
chr15	78078312	78080293	1982	*	8.55315	9.45258	5.66069	3.58494	3.62937e-15	8.45796e-12	Cacng2	39977
chr15	78082218	78083785	1568	*	6.11572	6.95129	3.90108	2.83674	7.98043e-12	4.78763e-09	Cacng2	36278
chr15	78099559	78100180	622	*	4.68257	5.53072	2.35917	2.93891	4.4364e-08	8.22105e-06	Cacng2	19410
chr15	78115715	78118148	2434	*	7.11454	8.03429	3.90645	3.91312	3.85426e-15	8.45796e-12	Cacng2	2348
chr15	78125106	78126094	989	*	5.52392	6.37419	3.18141	2.97237	2.21305e-10	8.3504e-08	Cacng2	-6320
chr15	78131499	78132204	706	*	4.37499	5.20105	2.23672	2.73158	4.09023e-06	0.000437844	Cacng2	-12572
chr15	78137505	78138403	899	*	4.88164	5.53077	3.67	1.64725	0.000302348	0.0179704	Cacng2	-18674
chr15	78139162	78142278	3117	*	9.00396	9.88591	6.33407	3.34604	1.17298e-14	1.95627e-11	Cacng2	-21440
chr15	78155042	78156423	1382	*	6.34731	7.0135	5.07195	1.73413	3.50575e-07	5.08419e-05	Ift27	18348
chr15	78157449	78159282	1834	*	7.83204	8.39285	6.90217	1.28591	2.63849e-05	0.00224511	Ift27	15715
chr8	78426577	78428449	1873	*	5.70917	6.45521	4.078	2.16543	1.21376e-08	2.67763e-06	Pou4f2	9134
chr8	78434460	78439567	5108	*	8.28056	9.10744	6.13589	2.76559	4.81425e-12	3.1792e-09	Pou4f2	-367
chr11	78503114	78504139	1026	*	5.68548	6.24683	4.7541	1.28506	6.34273e-05	0.00474788	Sebox	114
chr11	78745145	78746518	1374	*	6.57046	7.12306	5.66341	1.25379	6.2516e-05	0.00468808	Ccnq	5897
chr15	78753376	78754371	996	*	5.57856	6.12344	4.69254	1.22323	0.000606906	0.0329059	Mfng	19571
chr15	79130900	79132389	1490	*	7.33179	6.8346	7.70086	-1.06932	0.000414463	0.0236086	1700088E04Rik	9606
chr1	79439601	79440739	1139	*	6.29887	6.94707	5.09059	1.64912	7.46148e-07	9.82947e-05	Scg2	-144
chr2	79458925	79459632	708	*	4.5133	5.20223	3.1471	1.83711	0.000152138	0.0099816	Neurod1	-2643
chr7	79498957	79502288	3332	*	8.14682	8.72012	7.18123	1.33426	2.51746e-05	0.00215976	Mir9-3hg	597
chr7	79504118	79506575	2458	*	7.94419	8.50194	7.02288	1.27436	3.52124e-05	0.00285635	Mir9b-3	-11
chr14	79657913	79658767	855	*	5.69487	6.29767	4.63999	1.44947	1.60522e-05	0.00144736	Cnmd	3843
chr14	79676849	79678004	1156	*	5.84008	6.36561	5.00496	1.15392	0.000252727	0.0152936	Cnmd	-15244
chr10	79694826	79698845	4020	*	7.90654	8.40682	7.13432	1.06793	0.000591906	0.0322815	Gzmm	3010
chr10	79712215	79714090	1876	*	7.25378	7.82299	6.30004	1.31776	4.88326e-05	0.00380215	Hcn2	-3481
chr10	79714631	79719801	5171	*	9.17217	9.7933	8.05788	1.53106	7.88236e-07	0.000103025	Hcn2	582
chr10	79720505	79724331	3827	*	8.63459	9.43674	6.67048	2.56095	4.84186e-12	3.1792e-09	Hcn2	5784
chr10	79725292	79726920	1629	*	7.63027	8.29459	6.36207	1.72715	2.7934e-07	4.12281e-05	Hcn2	9472
chr10	79727604	79730790	3187	*	9.92672	10.4647	9.05925	1.20129	9.1149e-06	0.000894215	Hcn2	12563
chr14	79767748	79773375	5628	*	9.51755	10.3109	7.61216	2.49406	3.65533e-12	2.49848e-09	Gm9748	654
chr14	79773953	79774657	705	*	4.71268	5.47928	2.96961	2.28895	3.5796e-06	0.000390195	Pcdh8	-2993
chr15	79786159	79787006	848	*	5.1462	5.78481	3.97211	1.60165	0.000192286	0.0122122	Dnal4	-12116
chr14	79789261	79790431	1171	*	5.08353	5.76089	3.76445	1.78372	7.91484e-06	0.000789486	Pcdh8	-18534
chr14	79842681	79843873	1193	*	6.47251	7.12488	5.24903	1.66887	2.80358e-07	4.13052e-05	Gm10845	25899
chr14	80077955	80078578	624	*	5.31374	5.85815	4.42898	1.2208	0.000412071	0.0235196	Olfm4	77965
chr14	80172562	80174005	1444	*	7.3018	7.97153	6.01279	1.75296	4.09196e-08	7.63366e-06	Olfm4	172982
chr14	80212549	80213833	1285	*	5.32245	6.07745	3.64377	2.21909	6.77977e-08	1.19779e-05	Olfm4	212889
chr14	80215508	80216906	1399	*	7.10168	7.83496	5.53498	2.09328	8.09145e-10	2.64603e-07	Olfm4	215905
chr15	80278149	80278896	748	*	5.35946	6.19917	3.11002	2.86865	1.57176e-09	4.74881e-07	Cacna1i	-8715
chr15	80280633	80281299	667	*	4.65268	5.27201	3.54437	1.51452	0.000371972	0.0215107	Cacna1i	-6272
chr15	80286812	80289999	3188	*	7.33178	7.82016	6.58789	1.02744	0.00093105	0.0471398	Cacna1i	1168
chr11	80314586	80316018	1433	*	5.43203	5.98723	4.51779	1.26116	0.000461783	0.0261068	Rhbdl3	14390
chr11	80318087	80319584	1498	*	6.09545	6.77399	4.77163	1.79412	1.38739e-07	2.22916e-05	Rhbdl3	17924
chr11	80331636	80334024	2389	*	6.61858	7.30776	5.25133	1.84938	7.19915e-08	1.2612e-05	Rhbdl3	31918
chr18	80407246	80408040	795	*	5.23472	4.67897	5.63493	-1.15584	0.000854295	0.0439204	Kcng2	-43389
chr11	80614190	80615539	1350	*	6.7021	7.22419	5.87578	1.14293	0.000250758	0.0152076	C030013C21Rik	-105759
chr10	80748382	80748791	410	*	4.20858	3.02829	4.84895	-2.00712	9.56829e-05	0.00677878	Ap3d1	-6312
chr3	80800281	80803721	3441	*	8.98825	9.89446	5.99847	3.68961	2.80739e-16	1.46942e-12	Gria2	834
chr10	81024076	81025967	1892	*	6.89891	7.43997	6.0231	1.21147	0.000111712	0.00768613	Diras1	355
chr7	81074426	81075323	898	*	4.75654	4.05665	5.22578	-1.36598	0.000952907	0.0480133	Alpk3	17275
chr1	81076447	81077677	1231	*	5.27759	6.16099	2.59059	3.34146	2.30386e-11	1.23946e-08	Nyap2	112
chr11	81095882	81096390	509	*	4.59821	5.41618	2.52156	2.66541	1.50954e-06	0.000183231	Asic2	56767
chr11	81110005	81110582	578	*	3.9609	4.72526	2.23056	2.26275	8.0822e-05	0.00585549	Asic2	42609
chr11	81117762	81118851	1090	*	5.98918	6.91091	2.74607	3.93784	2.88784e-15	7.29739e-12	Asic2	34596
chr11	81151629	81153711	2083	*	7.38139	8.05508	6.07687	1.77251	2.08824e-07	3.18931e-05	Asic2	233
chr12	81235410	81236350	941	*	5.3321	5.85648	4.49994	1.14854	0.000959144	0.0482401	Gm3693	7596
chr18	81251580	81253527	1948	*	8.03862	8.57811	7.16701	1.20651	0.000605979	0.032877	Sall3	-265533
chr7	81488971	81490964	1994	*	6.86805	7.54813	5.53804	1.8036	8.90134e-08	1.52105e-05	Ap3b2	3957
chr5	81510711	81511225	515	*	4.86034	3.98373	5.40171	-1.61382	5.99818e-05	0.00453474	Adgrl3	489375
chr18	81838780	81840495	1716	*	7.07846	6.61082	7.43105	-1.02321	0.000599274	0.0325981	Mir5127	152442
chr11	81965808	81967129	1322	*	5.89758	6.60677	4.44398	1.95314	2.24753e-08	4.58238e-06	Asic2	1927
chr11	82386338	82390250	3913	*	8.7363	9.29022	7.82562	1.26023	0.000113617	0.00779328	Tmem132e	-606
chrX	82810856	82811423	568	*	4.7802	4.03892	5.26747	-1.42527	0.000520171	0.0288792	Dmd	-137730
chr11	83407757	83411981	4225	*	8.70894	9.22883	7.88819	1.13631	0.000157092	0.0102663	Rasl10b	181
chr11	83418034	83419466	1433	*	6.87676	7.66268	5.01855	2.43603	4.25328e-11	2.08634e-08	Rasl10b	8678
chr11	83427060	83427786	727	*	4.78509	5.48472	3.37357	1.89564	1.27171e-05	0.00119692	Gas2l2	2098
chr15	83841017	83843695	2679	*	7.61462	8.11506	6.84199	1.06836	0.000213029	0.0133466	Mpped1	57527
chr15	83869441	83871055	1615	*	5.72431	6.47108	4.08931	2.17005	9.47604e-09	2.17087e-06	Efcab6	49125
chr15	83876485	83877733	1249	*	6.10175	6.69031	5.09093	1.3924	1.51637e-05	0.00138037	Efcab6	42264
chr15	83924906	83925893	988	*	5.87751	6.69157	3.8297	2.64798	6.26395e-11	2.87002e-08	Efcab6	-6027
chr15	84086097	84087159	1063	*	6.10519	6.80448	4.69514	1.90061	4.98068e-08	9.14833e-06	Sult4a1	19126
chr7	84084968	84087700	2733	*	8.88942	9.37579	8.15024	1.02131	0.000408206	0.023315	Cemip	171
chr15	84092585	84093881	1297	*	5.93985	6.72346	4.09594	2.41545	2.11309e-09	6.05527e-07	Sult4a1	12521
chr15	84094788	84096704	1917	*	7.15323	7.89607	5.53855	2.15083	2.16991e-09	6.1968e-07	Sult4a1	10008
chr15	84104743	84106726	1984	*	7.2849	8.00751	5.76966	2.03158	1.84727e-09	5.40737e-07	Sult4a1	19
chr15	84120671	84121129	459	*	4.59626	5.19382	3.55779	1.42345	0.000871606	0.0446178	Pnpla5	2275
chr15	84130618	84134347	3730	*	8.92379	9.41421	8.17512	1.03485	0.000288969	0.0172737	Pnpla5	-9308
chr15	84140677	84141298	622	*	4.57918	5.23949	3.32618	1.69775	0.000125942	0.00846269	Pnpla5	-17813
chr8	84413518	84418916	5399	*	9.3232	9.97753	8.09251	1.68065	1.15071e-07	1.91149e-05	Cacna1a	853
chr8	84424585	84425821	1237	*	5.57328	6.37071	3.64089	2.51469	4.60491e-09	1.19254e-06	Cacna1a	9839
chr8	84439386	84443186	3801	*	7.58301	8.33752	5.90699	2.22439	2.65451e-10	9.70063e-08	Cacna1a	25922
chr8	84445896	84447932	2037	*	6.95456	7.81385	4.52676	3.0768	4.88985e-14	6.68458e-11	Cacna1a	31550
chr8	84449732	84450552	821	*	5.28951	6.12733	3.05611	2.84989	1.17898e-09	3.70995e-07	Cacna1a	34778
chr8	84453203	84455500	2298	*	6.78385	7.63269	4.45432	2.96785	8.71195e-14	1.05287e-10	Cacna1a	38988
chr8	84455949	84457220	1272	*	5.50484	6.36308	3.08734	3.05449	1.20528e-10	5.02534e-08	Cacna1a	41221
chr8	84457985	84461324	3340	*	8.65491	9.47666	6.54988	2.72133	2.29865e-12	1.71145e-09	Cacna1a	44291
chr8	84466728	84467252	525	*	4.50403	5.2624	2.80698	2.23218	5.72333e-06	0.000594349	Cacna1a	51626
chr8	84468555	84474611	6057	*	9.0253	9.91474	6.26456	3.44425	1.93668e-16	1.34581e-12	Cacna1a	56219
chr8	84474621	84475731	1111	*	5.10685	5.81687	3.64954	1.95332	5.76271e-06	0.000596212	Cacna1a	59812
chr8	84482874	84483820	947	*	5.01953	5.79061	3.25073	2.32133	1.24962e-06	0.000155994	Cacna1a	67983
chr8	84485071	84486834	1764	*	6.60643	7.42386	4.53388	2.67986	1.56432e-10	6.12428e-08	Cacna1a	70589
chr8	84500813	84503270	2458	*	9.24203	10.0694	7.09354	2.77088	5.01116e-12	3.26465e-09	Cacna1a	86678
chr8	84513560	84514365	806	*	5.39957	5.93866	4.52904	1.20161	0.000451134	0.0255221	Cacna1a	98599
chr11	84570316	84571501	1186	*	6.33956	6.85487	5.53038	1.11863	0.000230521	0.0142392	Lhx1os	45249
chr11	84642008	84643606	1599	*	8.42193	8.94349	7.59698	1.14209	8.7838e-05	0.00628732	1700109G15Rik	77625
chr11	84658088	84658517	430	*	3.8641	4.7009	1.63927	2.81081	8.8484e-06	0.000870576	1700109G15Rik	62129
chr12	84657048	84658531	1484	*	7.43931	7.96385	6.60675	1.1522	0.00016682	0.0107921	Vrtn	14894
chr11	84660758	84661346	589	*	4.52474	5.33049	2.53599	2.56651	4.29561e-07	6.06204e-05	1700109G15Rik	59380
chr12	84670474	84672240	1767	*	5.50968	6.30008	3.62308	2.46175	3.722e-09	1.00121e-06	Syndig1l	27450
chr12	84673697	84676715	3019	*	7.85898	8.74399	5.15266	3.38313	1.13251e-14	1.92733e-11	Syndig1l	23601
chr12	84682249	84684328	2080	*	6.4774	7.29982	4.36725	2.72161	1.97986e-10	7.53876e-08	Syndig1l	15518
chr1	84694353	84697538	3186	*	8.7533	9.39507	7.56808	1.62246	6.70352e-07	8.944e-05	Mir5126	107
chr12	84695404	84699746	4343	*	9.6454	10.4715	7.50659	2.76022	1.7916e-14	2.76666e-11	Syndig1l	1232
chr12	84702352	84703169	818	*	4.87912	5.58561	3.43758	1.93223	1.15912e-05	0.00110592	Syndig1l	-3954
chr12	84706410	84708649	2240	*	7.71508	8.48776	5.93695	2.34467	8.03494e-11	3.50799e-08	Syndig1l	-8723
chr11	84721369	84722576	1208	*	5.33614	6.04719	3.87419	1.96099	2.85156e-06	0.000321336	1700109G15Rik	-1541
chr11	84723817	84724671	855	*	4.83722	5.50756	3.54579	1.74776	6.2679e-05	0.00469608	1700109G15Rik	-3812
chr12	84745572	84746439	868	*	4.90923	5.49427	3.90898	1.37435	0.000982171	0.049184	Npc2	27106
chr15	84768544	84770718	2175	*	6.84887	7.60185	5.18108	2.21324	4.55992e-09	1.18457e-06	Gm20556	-49365
chr15	84771863	84773846	1984	*	6.42324	7.00554	5.43118	1.36803	5.3268e-06	0.000555941	Gm20556	-52589
chr15	84775371	84778424	3054	*	7.12312	7.83536	5.65581	1.97311	9.8217e-09	2.23167e-06	Gm20556	-56632
chr15	84779715	84780127	413	*	3.7791	4.60736	1.62364	2.73333	8.58978e-06	0.000848688	Gm20556	-59655
chr15	84782801	84783841	1041	*	4.89264	5.68737	2.978	2.48845	3.75925e-07	5.38626e-05	Gm20556	-63055
chr15	84790638	84794268	3631	*	6.29029	6.96316	4.98899	1.76635	8.75875e-06	0.000863337	Phf21b	62646
chr15	84798705	84800813	2109	*	6.04758	6.76281	4.56665	1.98673	8.70667e-08	1.49391e-05	Phf21b	55340
chr15	84803137	84804736	1600	*	6.07374	6.75993	4.71889	1.83259	2.09447e-07	3.19298e-05	Phf21b	51162
chr15	84807793	84833424	25632	*	10.1649	10.9403	8.37089	2.36505	2.82419e-12	2.03023e-09	Phf21b	34490
chr15	84834271	84835109	839	*	4.65714	5.48906	2.47237	2.78689	1.11013e-07	1.85146e-05	Phf21b	20409
chr15	84835698	84838622	2925	*	6.53224	7.32095	4.65645	2.45508	8.16996e-11	3.52997e-08	Phf21b	17939
chr15	84839228	84845855	6628	*	8.63708	9.48926	6.27696	3.00647	6.59278e-14	8.45793e-11	Phf21b	12557
chr15	84846338	84858097	11760	*	11.1694	11.7433	10.202	1.33722	1.58348e-07	2.49613e-05	Phf21b	2881
chr15	84876510	84877734	1225	*	5.91858	6.67793	4.21618	2.25061	2.09848e-08	4.33143e-06	Phf21b	-20993
chr15	84897966	84899044	1079	*	6.03067	6.72438	4.64444	1.87101	4.55963e-07	6.39031e-05	Nup50	-24923
chr15	84903348	84904679	1332	*	6.36072	7.05989	4.95116	1.90076	5.59716e-08	1.01909e-05	Nup50	-19414
chr8	84943790	84947583	3794	*	8.90424	9.41859	8.09746	1.11686	0.000308576	0.0182885	Rtbdn	-1304
chr11	84956926	84958899	1974	*	6.56466	7.08787	5.73549	1.14673	0.000148376	0.00978098	Car4	159
chr15	84957563	84958932	1370	*	5.9582	6.61843	4.7055	1.70454	7.8761e-07	0.000103025	5031439G07Rik	2714
chr15	84983039	84984554	1516	*	6.23571	6.76187	5.39897	1.15677	0.000662859	0.0354101	5031439G07Rik	4174
chr12	85296918	85298063	1146	*	5.95634	5.35661	6.3787	-1.22345	0.000101111	0.0070913	Zc2hc1c	8900
chr15	85465873	85466836	964	*	6.0251	6.56303	5.15765	1.1988	0.000108916	0.00754353	7530416G11Rik	36872
chr6	85483851	85484937	1087	*	5.41231	6.04532	4.25775	1.57789	7.12175e-05	0.00526019	Fbxo41	18600
chr6	85489595	85490465	871	*	5.29105	5.86943	4.3106	1.34978	0.000237811	0.0145708	Fbxo41	12964
chr6	85501743	85503634	1892	*	7.79543	8.34475	6.89736	1.24264	0.000117958	0.00804284	Fbxo41	305
chr6	85509922	85514439	4518	*	9.06371	9.7483	7.71537	1.82842	2.6305e-08	5.2352e-06	Egr4	1408
chr3	86126631	86127730	1100	*	5.79926	5.28914	6.17537	-1.08749	0.000651608	0.0348985	Snord73a	11677
chr12	86208403	86209006	604	*	4.30435	5.04039	2.72401	2.09288	2.91666e-05	0.00243461	Gpatch2l	-33153
chr12	86212273	86214795	2523	*	7.04115	7.76066	5.5404	2.01362	3.47637e-09	9.44271e-07	Gpatch2l	-28324
chr12	86216163	86217530	1368	*	6.54126	7.1797	5.36777	1.6053	2.25422e-06	0.000260717	Gpatch2l	-25011
chr12	86220316	86221306	991	*	5.51898	6.12142	4.46524	1.44745	5.4307e-05	0.00415088	Gpatch2l	-21047
chr12	86508131	86510226	2096	*	7.29681	7.78164	6.56121	1.0156	0.000397942	0.022854	Esrrb	87535
chr15	86542267	86543305	1039	*	5.72845	6.32273	4.70015	1.41453	2.24904e-05	0.00195156	Tbc1d22a	265111
chr12	86546010	86546854	845	*	5.10146	5.8999	3.16238	2.51826	1.26802e-08	2.78995e-06	Esrrb	124788
chr12	86981051	86981761	711	*	4.765	5.38823	3.64373	1.53154	0.000440527	0.0249729	Zdhhc22	7270
chr12	86983226	86984347	1122	*	5.95411	6.51501	5.02397	1.28405	5.18195e-05	0.0039937	Zdhhc22	4889
chr12	86989142	86991726	2585	*	8.31173	8.96888	7.07054	1.69354	3.3122e-07	4.81187e-05	Zdhhc22	-1758
chr9	86999701	87000670	970	*	6.86904	7.53219	5.60528	1.7206	7.82007e-08	1.35573e-05	Ripply2	-15351
chr9	87014835	87016639	1805	*	7.24398	7.84863	6.18328	1.45996	1.834e-05	0.00163567	Ripply2	200
chr12	87026138	87027057	920	*	5.87334	6.58971	4.38718	1.99261	1.21056e-07	1.99107e-05	Tmem63c	306
chr12	87030951	87032078	1128	*	5.40777	6.14699	3.81148	2.12223	7.0081e-07	9.29092e-05	Tmem63c	5223
chr8	87037117	87038549	1433	*	6.69516	7.24102	5.80648	1.22886	3.35429e-05	0.00273689	N4bp1	-152575
chr12	87042765	87044391	1627	*	6.70859	7.56279	4.32953	3.02199	5.89068e-13	5.398e-10	Tmem63c	17286
chr4	87062458	87063697	1240	*	5.95575	6.47371	5.13989	1.1273	0.000247172	0.0150338	Slc24a2	164885
chr8	87075862	87076460	599	*	4.80146	5.44181	3.62124	1.60716	0.000157764	0.0103021	Gm10637	123689
chr8	87078006	87079255	1250	*	7.83509	8.47952	6.64037	1.63408	1.46628e-07	2.32455e-05	Gm10637	121219
chr8	87092282	87096318	4037	*	9.62328	10.1552	8.77162	1.17944	1.99652e-05	0.00176364	Gm10637	105550
chr4	87140777	87143129	2353	*	7.07898	7.62125	6.19999	1.21601	9.59864e-05	0.00677878	Slc24a2	86010
chr4	87210647	87211815	1169	*	5.52751	6.26338	3.94806	2.10292	4.02702e-08	7.52935e-06	Slc24a2	16732
chr4	87217112	87218946	1835	*	7.68922	8.42433	6.11353	2.10499	2.00982e-09	5.79921e-07	Slc24a2	9934
chr4	87221620	87222164	545	*	4.5934	5.24713	3.36495	1.66719	0.000743823	0.0390105	Slc24a2	6071
chr4	87226952	87228161	1210	*	6.28561	6.94778	5.02561	1.71459	2.78133e-07	4.11958e-05	Slc24a2	406
chr4	87229116	87231161	2046	*	9.00375	9.60112	7.96586	1.4309	3.62904e-06	0.000395067	Slc24a2	401
chr15	87339118	87340434	1317	*	5.85226	6.46563	4.76354	1.49422	6.14707e-06	0.000632057	Tafa5	-204523
chr17	87796335	87799502	3168	*	9.27086	10.0597	7.39435	2.46057	4.56592e-12	3.04598e-09	Kcnk12	75
chr3	87998818	88003022	4205	*	9.36185	9.86365	8.58596	1.07352	0.00023229	0.0142955	Bcan	-564
chr15	88123892	88124466	575	*	4.55496	5.26836	3.08233	1.96731	3.07542e-05	0.00254674	B230214G05Rik	-190695
chr3	88220626	88221567	942	*	5.9045	5.33315	6.31268	-1.18089	0.000158161	0.01032	Mir9b-1	-5427
chr3	88232230	88233321	1092	*	5.27689	5.95553	3.95266	1.79125	1.32328e-05	0.00123569	Mir9b-1	-17106
chr15	89452518	89455467	2950	*	8.01031	8.67184	6.75271	1.7141	1.84655e-07	2.86213e-05	Mapk8ip2	82
chr3	89748498	89749212	715	*	5.65976	6.36872	4.20721	1.95086	7.66264e-08	1.33298e-05	Chrnb2	15777
chr3	89763190	89765513	2324	*	8.54996	9.27164	7.0391	2.02763	5.12358e-09	1.31867e-06	Chrnb2	280
chr1	89780458	89781865	1408	*	6.17227	6.7736	5.12203	1.44465	3.44483e-06	0.000377975	4933400F21Rik	-97270
chr1	89784286	89785361	1076	*	5.66048	6.21626	4.74464	1.26404	0.000142596	0.0094673	4933400F21Rik	-100932
chr3	89830687	89832108	1422	*	6.79185	7.29514	6.01234	1.07749	0.000309454	0.0183274	She	28
chr1	90093166	90094188	1023	*	5.99139	5.40413	6.40757	-1.2048	6.185e-05	0.00464649	Iqca	59724
chr7	90658522	90660038	1517	*	6.23344	5.60844	6.66809	-1.26114	0.000186734	0.0119071	Tmem126b	-183285
chr10	90770779	90772122	1344	*	5.88077	6.38134	5.10783	1.06702	0.000502375	0.0280405	Anks1b	-58203
chr10	90827994	90831644	3651	*	8.07308	8.63741	7.13326	1.29951	3.30215e-05	0.002697	Anks1b	-24
chr10	90833901	90835587	1687	*	7.60195	8.33153	6.05339	2.0723	1.48447e-08	3.19867e-06	Anks1b	4901
chr10	90851785	90852722	938	*	5.26492	5.90193	4.09646	1.59508	7.841e-05	0.00573556	Anks1b	22411
chr10	90864062	90864744	683	*	4.17815	5.00204	2.05682	2.70791	2.86065e-06	0.000321925	Anks1b	34560
chr7	90886642	90887868	1227	*	6.63174	6.03003	7.05508	-1.22733	0.000113644	0.00779328	Dlg2	-203531
chr10	90897484	90898774	1291	*	6.6711	7.32956	5.42504	1.69788	2.60655e-07	3.89529e-05	Anks1b	68286
chr10	90903508	90904353	846	*	4.74879	5.34908	3.70179	1.43557	0.000681339	0.0362348	Anks1b	74088
chr17	91092213	91093693	1481	*	6.76333	7.66489	3.84097	3.60942	1.06329e-14	1.88652e-11	Nrxn1	-151
chr2	91179517	91181103	1587	*	6.77365	7.44847	5.46469	1.77714	4.49809e-08	8.31687e-06	Madd	-989
chr6	91222534	91223536	1003	*	5.67506	6.20349	4.83248	1.16386	0.000741545	0.0389645	Fbln2	10271
chr4	91359576	91360108	533	*	4.57362	5.22235	3.36344	1.64348	0.000218232	0.0136214	Elavl2	12213
chr4	91370228	91373297	3070	*	8.23201	8.87868	7.02927	1.6446	8.52077e-07	0.00010999	Elavl2	292
chr4	91374219	91377371	3153	*	9.45652	9.96701	8.65934	1.10351	0.000310694	0.0183878	Elavl2	701
chr4	91379639	91381897	2259	*	6.579	7.25115	5.28051	1.76363	8.6935e-08	1.49391e-05	Elavl2	-4272
chr6	91838666	91840194	1529	*	6.80885	7.50403	5.41642	1.88078	6.12685e-08	1.10348e-05	Grip2	-32037
chr6	91843154	91843892	739	*	5.29651	6.00791	3.833	1.96241	6.36348e-07	8.55024e-05	Ccdc174	-34530
chr7	92322338	92322926	589	*	4.48915	3.75118	4.97501	-1.4186	0.000997386	0.049803	Dlg2	87662
chr2	92379212	92383773	4562	*	8.03206	8.58469	7.12494	1.25512	0.000109484	0.00757032	1700029I15Rik	-1425
chr2	92627555	92628168	614	*	4.72405	5.41446	3.35165	1.84719	5.21781e-05	0.00401671	Chst1	26745
chr2	92666528	92668836	2309	*	8.21797	9.00715	6.33916	2.46235	5.33267e-11	2.49824e-08	Chst1	66565
chr2	92678298	92678978	681	*	4.3545	5.089	2.7818	2.0848	0.000156209	0.0102165	Chst1	77521
chr6	92987427	92988268	842	*	5.38399	4.82163	5.78759	-1.16613	0.000623114	0.0335231	Adamts9	-44314
chr2	93071801	93072517	717	*	5.74378	6.39787	4.51397	1.67487	1.46753e-06	0.000178912	Prdm11	-25994
chr2	93075854	93077502	1649	*	6.56479	7.1406	5.59193	1.34263	2.50563e-05	0.00215404	Prdm11	-30513
chr2	93082235	93084043	1809	*	7.14464	7.81194	5.86501	1.74099	1.32983e-07	2.15326e-05	Prdm11	-36974
chr11	93097197	93100825	3629	*	8.25834	9.16321	5.28836	3.66701	2.011e-15	5.40953e-12	Car10	-279
chr11	93102264	93103737	1474	*	6.1378	6.9778	3.88591	2.87785	3.64619e-11	1.82067e-08	Car10	3711
chr11	93108818	93110653	1836	*	6.91407	7.78058	4.41395	3.15574	1.74104e-13	1.94536e-10	Car10	10446
chr11	93123834	93124968	1135	*	5.52453	6.42818	2.57227	3.62641	1.09671e-11	6.35095e-09	Car10	25111
chr11	93188462	93189077	616	*	4.30644	5.19656	1.537	3.40211	1.00216e-07	1.69168e-05	Car10	89480
chr11	93366536	93367492	957	*	4.79499	5.61643	2.69233	2.69839	1.59673e-07	2.51226e-05	Car10	267724
chr11	93373441	93374847	1407	*	6.54125	7.35622	4.48681	2.65918	2.75164e-11	1.4341e-08	Car10	274854
chr11	93471335	93472325	991	*	5.59372	6.17482	4.60524	1.36138	4.72393e-05	0.00369534	Car10	372540
chr11	93515310	93516440	1131	*	5.4187	6.23425	3.36003	2.65629	3.55414e-08	6.79762e-06	Utp18	369891
chr11	93530937	93531610	674	*	5.19517	5.80065	4.13181	1.45852	0.000267807	0.0161243	Utp18	354492
chr2	94241141	94242538	1398	*	5.84924	6.55582	4.40728	1.93888	5.2923e-07	7.24662e-05	Mir129-2	-387
chr2	94243199	94248079	4881	*	8.07568	8.76914	6.69054	1.87347	1.28203e-08	2.81335e-06	Mir129-2	-4186
chr3	94477118	94479751	2634	*	8.20207	9.05627	5.82309	3.02665	5.87122e-14	7.64993e-11	Celf3	-31
chr13	94875852	94877875	2024	*	6.78768	7.42284	5.62568	1.59098	1.75282e-06	0.000208809	Otp	1228
chr16	94956409	94957741	1333	*	5.51525	6.23162	4.02905	1.99083	5.47413e-07	7.45237e-05	Kcnj6	40621
chr16	94995048	94996200	1153	*	5.06058	5.86665	3.06958	2.5764	6.33867e-08	1.12463e-05	Kcnj6	2072
chr16	94996727	94998152	1426	*	7.13715	7.94946	5.10196	2.63953	2.68586e-11	1.41576e-08	Kcnj6	256
chr16	95042525	95044005	1481	*	6.80416	7.40828	5.74511	1.4572	3.11e-06	0.000346248	Kcnj6	-45569
chr16	95092771	95094217	1447	*	5.66133	6.27963	4.55641	1.5145	1.44865e-05	0.00132895	Kcnj6	-95798
chr6	95229834	95230276	443	*	4.13007	4.9136	2.28667	2.39476	1.83144e-05	0.00163514	AY512915	103938
chr16	95321674	95322608	935	*	6.48578	6.01874	6.83803	-1.0217	0.000716551	0.0377941	Gm31641	-62439
chr15	95526157	95529037	2881	*	8.28181	8.92071	7.10675	1.6092	5.40706e-07	7.37953e-05	Nell2	417
chr10	97399457	97400168	712	*	4.73271	3.86434	5.27098	-1.60205	0.000170551	0.0109823	Mir3966	-23665
chr15	97634850	97635690	841	*	5.31565	4.584	5.79879	-1.41367	0.000733703	0.0386255	Rpap3	70552
chr11	98313209	98315046	1838	*	6.87121	7.59264	5.3615	2.02413	1.85895e-09	5.42015e-07	Neurod2	15517
chr11	98319419	98325993	6575	*	7.9996	8.55317	7.08985	1.25866	4.04825e-05	0.00324284	Neurod2	6939
chr3	99311912	99312535	624	*	5.15852	5.76183	4.10204	1.44988	0.000236558	0.014526	Tbx15	58464
chr7	99641113	99642137	1025	*	6.05873	6.60857	5.15923	1.24271	8.57799e-05	0.00616646	Tpbgl	-14522
chr7	99643228	99645520	2293	*	7.50157	8.22064	6.00288	2.01188	4.47505e-09	1.168e-06	Tpbgl	-17271
chr7	99648341	99651487	3147	*	8.64927	9.39879	6.9998	2.19404	1.44826e-09	4.40764e-07	Tpbgl	-22811
chr7	99795020	99795964	945	*	5.8554	6.36638	5.05699	1.1028	0.000344338	0.0201219	Olfr521	28328
chrX	99818998	99823779	4782	*	9.08819	9.81086	7.57265	2.03361	1.17886e-09	3.70995e-07	Tmem28	1225
chr13	99900107	99901222	1116	*	5.83912	6.41052	4.87903	1.32413	5.3375e-05	0.00409089	Cartpt	18
chr12	100210222	100211636	1415	*	6.93515	7.4479	6.13235	1.11035	0.000896132	0.0456212	Calm1	10785
chr12	100262493	100263308	816	*	5.50497	6.13866	4.34804	1.58138	1.37737e-05	0.00127619	Gm10432	-13708
chr12	100264974	100268914	3941	*	8.82165	9.4387	7.72088	1.51336	1.30199e-06	0.000160847	Gm10432	-9665
chr12	100269482	100271104	1623	*	7.81371	8.29414	7.08831	1.00127	0.000684247	0.0363431	Gm10432	-6316
chr12	100271525	100273656	2132	*	6.98863	7.58185	5.96355	1.4127	6.34451e-06	0.000647567	Gm10432	-4018
chr15	100838537	100839564	1028	*	6.39755	6.88213	5.66257	1.01394	0.00053221	0.0294691	Scn8a	-31594
chr15	100869811	100872418	2608	*	8.68877	9.35482	7.41393	1.73627	1.19923e-07	1.97634e-05	Scn8a	470
chr15	100873060	100873700	641	*	4.40871	3.32704	5.0199	-1.88241	8.75602e-05	0.00627821	Scn8a	2735
chr15	100909129	100911090	1962	*	7.60278	8.38911	5.74196	2.44068	4.97606e-11	2.35766e-08	Scn8a	-26161
chr15	101039407	101040932	1526	*	6.01762	5.49516	6.40036	-1.10688	0.000400574	0.022942	Fignl2	14229
chr7	101443530	101445060	1531	*	6.48167	7.13736	5.24597	1.68448	6.1806e-06	0.000634722	Pde2a	-6225
chr4	101549344	101552595	3252	*	8.54655	9.15021	7.48897	1.4567	2.81569e-06	0.000319019	Dnajc6	376
chr4	101588683	101589873	1191	*	5.74431	6.25846	4.93802	1.11361	0.000576989	0.0316335	Dnajc6	38684
chr11	101603658	101605526	1869	*	8.02478	8.55101	7.18785	1.15858	0.000221897	0.0138294	Gm11634	-5336
chr15	101926833	101928419	1587	*	7.50177	8.02818	6.6644	1.15892	0.000146186	0.00966716	Krt4	-2891
chr9	102068758	102069875	1118	*	5.86723	6.40118	5.01028	1.184	0.000147069	0.00971014	Mir7243	235658
chr11	102392018	102396900	4883	*	9.85252	10.5578	8.41644	1.93703	1.40057e-09	4.28491e-07	Rundc3a	1056
chr11	102400464	102405147	4684	*	7.57656	8.14734	6.61831	1.32406	1.92401e-05	0.00170602	Mir6930	2181
chr12	102498640	102500245	1606	*	6.3343	6.89054	5.41717	1.26715	7.44198e-05	0.00545804	Golga5	29533
chr12	102516202	102517011	810	*	5.07908	5.67419	4.04818	1.41559	0.000247419	0.0150379	Chga	-38334
chr12	102524499	102525232	734	*	6.51787	7.07644	5.59427	1.27621	2.58151e-05	0.00220789	Chga	-30075
chr12	102528771	102529858	1088	*	5.27003	6.06491	3.35445	2.49284	1.9057e-08	4.00988e-06	Chga	-25626
chr12	102531724	102533787	2064	*	8.65563	9.34105	7.30392	1.83242	1.90903e-08	4.00988e-06	Chga	-22185
chr12	102539130	102541516	2387	*	7.22021	8.06099	4.96169	2.89077	4.12533e-13	4.09532e-10	Chga	-14618
chr12	102545863	102547113	1251	*	5.7732	6.69427	2.54185	3.92156	1.65578e-12	1.29041e-09	Chga	-8453
chr12	102549902	102552563	2662	*	8.64356	9.45372	6.6238	2.62456	1.8983e-12	1.43907e-09	Chga	-3708
chr12	102553727	102556539	2813	*	8.59877	9.48127	5.9224	3.35244	7.96504e-15	1.61999e-11	Chga	192
chr12	102566460	102567936	1477	*	6.06129	6.78095	4.55991	2.01186	1.85264e-07	2.86623e-05	Chga	12257
chr12	102569280	102572084	2805	*	8.85684	9.35722	8.08436	1.06859	0.000269975	0.0162314	Chga	15741
chr12	102575325	102576463	1139	*	5.48854	6.21805	3.94033	2.06551	1.47735e-07	2.33765e-05	Chga	20953
chr12	102713062	102714006	945	*	5.37604	5.90259	4.5383	1.1563	0.00097764	0.0490225	Itpk1	-8665
chr12	102730006	102732090	2085	*	7.73769	8.29049	6.83009	1.25562	0.000150951	0.00991934	Moap1	12613
chr12	102948333	102949428	1096	*	8.54424	9.45666	5.4586	3.79064	2.99561e-16	1.46942e-12	Unc79	22
chr12	102949737	102950850	1114	*	6.53242	7.34722	4.47924	2.65777	7.42538e-12	4.55291e-09	Unc79	1435
chr13	103014387	103015605	1219	*	6.5916	6.05539	6.98163	-1.12859	0.000370302	0.021429	1700099I09Rik	254741
chr12	103017576	103019353	1778	*	6.59401	7.3648	4.82685	2.32925	1.76841e-09	5.24867e-07	Unc79	69606
chr12	103036732	103037624	893	*	4.96363	5.53447	4.00519	1.31914	0.000597041	0.0325105	Unc79	88319
chr12	103040028	103040977	950	*	5.14997	5.88315	3.58378	2.08442	2.84011e-06	0.000320913	Unc79	91644
chr12	103042200	103043461	1262	*	6.1865	6.81635	5.0428	1.56613	3.19243e-06	0.000354008	Unc79	93972
chr12	103043996	103044755	760	*	5.34066	6.06437	3.8202	2.03125	2.19046e-07	3.32109e-05	Unc79	95517
chr12	103098835	103100227	1393	*	5.92041	6.63062	4.46226	1.95894	3.33486e-08	6.43729e-06	Prima1	142615
chr12	103281413	103282854	1442	*	6.81107	7.31572	6.02821	1.08221	0.000200336	0.0126559	Gm29508	32635
chr3	103572764	103577431	4668	*	8.80082	9.51391	7.32965	1.97954	4.13826e-09	1.0992e-06	Syt6	-147
chr3	103600491	103602016	1526	*	7.19307	7.81729	6.06847	1.54324	3.79987e-06	0.000412588	Syt6	25128
chr3	103612387	103613242	856	*	5.78059	6.37519	4.75129	1.41613	1.56081e-05	0.00141473	Syt6	36689
chr11	103648911	103650880	1970	*	7.56009	8.07077	6.7624	1.10361	0.000649111	0.0347871	Rprml	387
chr11	104024679	104025171	493	*	4.54403	5.20434	3.29102	1.69793	0.000191171	0.0121691	Arf2	58054
chr11	104028671	104029837	1167	*	5.61575	6.39166	3.81857	2.35975	5.23442e-09	1.33893e-06	Arf2	62383
chr11	104085766	104086655	890	*	5.28065	5.89933	4.17448	1.51487	4.99868e-05	0.00388286	Crhr1	-46570
chr11	104099303	104100380	1078	*	5.96812	6.50912	5.0925	1.20983	0.000119778	0.00812044	Crhr1	-32939
chr11	104114791	104115460	670	*	5.21982	5.82739	4.14977	1.46793	0.00025307	0.0153033	Crhr1	-17655
chr11	104130406	104134187	3782	*	8.32742	8.82279	7.56698	1.05141	0.000538759	0.0297921	Crhr1	-484
chr2	104305748	104306590	843	*	5.25517	6.00639	3.59675	2.19467	6.73655e-07	8.97371e-05	D430041D05Rik	104165
chr11	104318902	104320238	1337	*	6.4834	5.99428	6.84802	-1.05607	0.000291273	0.0173865	Mapt	88134
chr9	104554909	104556094	1186	*	6.20711	7.00657	4.26123	2.53403	1.57798e-10	6.1489e-08	Cpne4	-11174
chr3	105227674	105229054	1381	*	5.98014	6.56293	4.98661	1.36906	3.61692e-05	0.00292826	4930564D02Rik	161520
chr12	105248248	105249220	973	*	5.27189	5.89372	4.15531	1.52826	4.29924e-05	0.00341437	Tcl1	-25997
chr12	105277143	105278351	1209	*	5.60288	6.36253	3.89881	2.25113	7.56258e-09	1.78146e-06	Tcl1	-55010
chr3	105280512	105282683	2172	*	8.52572	9.10409	7.54533	1.35427	3.38607e-05	0.00276012	Kcnd3	-170292
chr3	105297907	105299566	1660	*	6.5154	7.31187	4.58936	2.5127	1.61081e-10	6.2476e-08	Kcnd3	-153153
chr3	105307890	105309910	2021	*	8.38125	9.05847	7.06273	1.7909	5.3784e-08	9.85713e-06	Kcnd3	-142990
chr12	105336362	105337663	1302	*	6.58904	7.14892	5.66179	1.28123	2.71402e-05	0.00229533	Tunar	20
chr3	105480876	105483203	2328	*	7.30241	8.15273	4.95937	2.98468	1.60771e-13	1.84067e-10	Kcnd3os	-29085
chr3	105489070	105490299	1230	*	6.13092	6.86868	4.54202	2.11729	3.00664e-09	8.27461e-07	Kcnd3os	-36730
chr3	105520870	105521720	851	*	5.45247	6.19662	3.83101	2.15255	7.96206e-08	1.37463e-05	Kcnd3os	-68340
chr14	105570026	105570632	607	*	5.43161	4.9196	5.80873	-1.08965	0.000933553	0.0472015	9330188P03Rik	-19220
chr8	105692947	105695488	2542	*	9.10289	9.70975	8.03514	1.47026	3.19017e-06	0.000354008	Pard6a	-6930
chr11	106001297	106002395	1099	*	6.52007	7.02545	5.73545	1.08438	0.000147263	0.00971531	Kcnh6	-6302
chr11	106007616	106008827	1212	*	6.42615	6.95687	5.57761	1.1734	0.000119455	0.00810513	Kcnh6	74
chr11	106012367	106014921	2555	*	8.26884	8.85453	7.26662	1.3833	1.4828e-05	0.0013535	Kcnh6	5496
chr12	106115227	106116115	889	*	5.37279	6.15463	3.5398	2.39896	1.34971e-08	2.93867e-06	Vrk1	79131
chr8	106269760	106271361	1602	*	6.68285	7.20834	5.84783	1.15499	9.58028e-05	0.00677878	4930506A18Rik	-11668
chr8	106298251	106299661	1411	*	5.81339	6.30811	5.05448	1.04711	0.000580221	0.0317689	4930506A18Rik	16727
chr8	106300734	106301475	742	*	5.77325	6.32659	4.86417	1.25504	0.000121001	0.00818342	4930506A18Rik	18876
chr8	106376481	106377959	1479	*	5.96197	6.47667	5.1543	1.11593	0.000772859	0.0403556	Zfp90	-38107
chr12	106630569	106631883	1315	*	5.80944	6.72273	2.70997	3.78441	3.62648e-12	2.49848e-09	4933406K04Rik	85098
chr12	106721339	106721870	532	*	4.79231	5.51068	3.29688	1.99682	1.92515e-05	0.00170602	4933406K04Rik	-5281
chr12	106781357	106782814	1458	*	6.44446	6.9796	5.58438	1.18932	6.42648e-05	0.00480195	4933406K04Rik	-65762
chr12	106796001	106797780	1780	*	7.83467	8.35202	7.02037	1.127	0.000152958	0.0100275	4933406K04Rik	-80567
chr8	106899024	106899973	950	*	5.23439	4.65377	5.64725	-1.19319	0.000738061	0.0388059	Utp4	5859
chr12	106938871	106940339	1469	*	6.95673	7.53996	5.96192	1.37247	2.21476e-05	0.00193187	4933406K04Rik	-223281
chr11	107049338	107051334	1997	*	6.6134	5.79747	7.13138	-1.53562	4.84373e-06	0.000510637	1810010H24Rik	22113
chr12	107066523	107068247	1725	*	6.9126	7.55523	5.72433	1.62486	5.20623e-06	0.000544392	4933406K04Rik	-351061
chr3	107183147	107183595	449	*	4.77825	4.09476	5.24013	-1.3426	0.000585543	0.0320183	Kcna10	228
chr9	107377394	107379009	1616	*	7.46766	8.00552	6.60039	1.20023	8.44473e-05	0.00609167	Cacna2d2	-21678
chr12	107423575	107424773	1199	*	6.41614	6.9764	5.4878	1.28246	4.45128e-05	0.00351504	4930465M20Rik	311314
chr12	107458062	107458660	599	*	4.32776	5.07951	2.6665	2.18778	2.1958e-05	0.00191734	4930465M20Rik	277127
chr11	107812139	107814212	2074	*	6.79597	7.28443	6.05191	1.02728	0.00098381	0.049184	Cacng4	-18470
chr11	107822924	107823976	1053	*	6.13995	6.67141	5.2895	1.17558	0.000129224	0.0086414	Cacng4	-28744
chr12	108003042	108004574	1533	*	6.26248	6.77451	5.46147	1.10706	0.00042432	0.0241197	Bcl11b	-394
chr9	108148035	108148938	904	*	5.45436	6.11608	4.19606	1.70961	2.69723e-06	0.000306429	4930447F24Rik	11632
chr9	108172751	108175142	2392	*	6.92392	7.61023	5.5686	1.83515	2.02452e-08	4.22056e-06	Bsn	16436
chr5	108541868	108543516	1649	*	6.62207	7.50721	3.91415	3.37885	9.61515e-13	8.09897e-10	Cplx1	7335
chr5	108548592	108551304	2713	*	8.93872	9.73781	6.99531	2.53748	1.96056e-11	1.06856e-08	Cplx1	79
chr9	108752845	108755210	2366	*	7.84898	8.3628	7.04351	1.11467	0.000242106	0.0147904	Ip6k2	-41966
chr9	108774171	108775382	1212	*	6.00081	6.66439	4.73541	1.72065	2.96654e-07	4.33234e-05	Ip6k2	-21217
chr9	108818760	108820280	1521	*	5.90293	6.41972	5.09004	1.12311	0.000266512	0.0160696	Celsr3	-6525
chr9	108823460	108827909	4450	*	11.0345	11.9597	7.7277	4.02728	9.144e-23	7.62509e-18	Celsr3	-360
chr9	108831018	108833509	2492	*	8.09574	7.56953	8.48047	-1.11433	0.000203689	0.0128299	Celsr3	6219
chr14	108911022	108914240	3219	*	6.79767	7.40193	5.73819	1.4578	1.21262e-05	0.0011517	Slitrk1	1608
chr12	108967827	108968630	804	*	5.03228	5.61635	4.03495	1.37095	0.000613317	0.0331028	Wdr25	73957
chr12	108978986	108985591	6606	*	8.93356	9.53977	7.86786	1.46751	2.37258e-06	0.000273648	Begain	85928
chr12	108993939	108997215	3277	*	8.5984	9.38596	6.72983	2.4509	3.46667e-11	1.74146e-08	Begain	72640
chr7	109072101	109072478	378	*	3.92925	4.67859	2.28079	2.16751	0.000196293	0.0124282	Ric3	11034
chr7	109082076	109084163	2088	*	7.95914	8.70772	6.31467	2.18748	4.34279e-09	1.14601e-06	Ric3	204
chr2	109672725	109679063	6339	*	9.4976	10.2523	7.82078	2.22695	1.2135e-10	5.03445e-08	Bdnf	-3
chr2	109691003	109692747	1745	*	6.68208	7.221	5.81199	1.2034	5.00089e-05	0.00388286	Bdnf	-561
chr8	110167390	110169092	1703	*	7.81166	8.30956	7.04516	1.0598	0.00047088	0.0265851	Calb2	-29
chr8	110182213	110184827	2615	*	7.66622	8.24617	6.68117	1.36007	1.1292e-05	0.00108109	Calb2	-15308
chr8	110200446	110202356	1911	*	6.31499	7.007	4.93594	1.86308	3.18041e-08	6.21678e-06	Cmtr2	-16559
chr13	110279444	110281302	1859	*	7.87515	8.54778	6.57478	1.76782	1.00679e-07	1.69607e-05	Rab3c	-167
chr5	110512872	110515404	2533	*	8.34476	8.99004	7.14699	1.63831	1.33241e-06	0.000163877	A630023P12Rik	-785
chr5	110523266	110524266	1001	*	5.05935	5.69104	3.90936	1.57078	0.000149947	0.00986118	A630023P12Rik	8843
chr5	110526213	110527154	942	*	6.90918	7.5239	5.81606	1.50198	1.60517e-06	0.000192872	A630023P12Rik	11761
chr5	110540583	110541790	1208	*	5.61596	6.31592	4.20303	1.90251	1.81472e-06	0.000214649	Galnt9	-3168
chr5	110543259	110549085	5827	*	9.81445	10.6241	7.79823	2.62131	1.93867e-13	2.12716e-10	Galnt9	1817
chr5	110552699	110554205	1507	*	5.62356	6.36429	4.0196	2.13237	2.7516e-07	4.0828e-05	Galnt9	9097
chr5	110562052	110566509	4458	*	9.61939	10.1787	8.69376	1.28075	2.04225e-05	0.00179453	Galnt9	19926
chr5	110570286	110572642	2357	*	7.58414	8.35701	5.80493	2.34575	1.49008e-10	5.86115e-08	Galnt9	27109
chr5	110579712	110584549	4838	*	10.0596	10.6432	9.06351	1.37559	1.85053e-06	0.000217957	Galnt9	-21374
chr5	110624553	110626474	1922	*	7.01255	7.52623	6.20741	1.11365	0.000168553	0.010862	Galnt9	22009
chr7	110694889	110697527	2639	*	7.61376	8.1834	6.65877	1.31971	3.5793e-05	0.00290062	Adm	68551
chr7	110697765	110700289	2525	*	9.6193	10.1824	8.68285	1.29541	1.38191e-05	0.00127898	Ampd3	-69179
chr7	110713524	110714045	522	*	5.50172	6.07297	4.54208	1.32274	0.000194153	0.012312	Ampd3	-54421
chr4	111453057	111454314	1258	*	5.67424	5.20623	6.02704	-1.02206	0.000970018	0.0486989	Bend5	38680
chr5	112012549	112013554	1006	*	6.46721	7.05069	5.47163	1.37281	7.67196e-05	0.00562177	1700028D13Rik	-193711
chr5	112017774	112021793	4020	*	9.10878	9.64279	8.25167	1.18688	8.83267e-05	0.00631262	1700028D13Rik	-186979
chr8	112098028	112098720	693	*	5.26455	5.95043	3.91094	1.8277	2.11597e-06	0.000246437	Terf2ip	87015
chr5	112575949	112577917	1969	*	7.36052	8.05927	5.95278	1.90058	1.30006e-08	2.83799e-06	Sez6l	265
chr5	112640708	112641460	753	*	5.65051	6.15922	4.85773	1.09453	0.000822999	0.0425738	1700034G24Rik	-51088
chr5	112718570	112720650	2081	*	6.26721	6.80984	5.38724	1.21632	0.000100106	0.00703267	1700095B10Rik	-73682
chr5	112747816	112748570	755	*	4.80779	5.40258	3.77787	1.41306	0.000675997	0.0360196	1700095B10Rik	-45099
chr12	113065955	113067737	1783	*	6.2947	5.82273	6.64974	-1.02928	0.000611084	0.0330465	Tex22	-7656
chr6	113183753	113184813	1061	*	5.22691	5.81188	4.22687	1.37564	0.000334644	0.019622	Lhfpl4	11101
chr6	113193346	113196253	2908	*	8.95221	9.45699	8.16904	1.0837	0.000205091	0.0128977	Lhfpl4	584
chr9	113266209	113268249	2041	*	6.95824	7.45778	6.18779	1.06485	0.000209825	0.0131656	AU023762	319923
chr5	113270867	113271964	1098	*	7.64869	8.15501	6.86176	1.08855	0.000317735	0.0187646	Sgsm1	9185
chr5	113280127	113281119	993	*	5.87869	6.61026	4.32041	2.07967	2.15202e-08	4.43099e-06	Sgsm1	-22
chr6	113281729	113283767	2039	*	7.37649	7.94573	6.42267	1.31795	1.33321e-05	0.00124357	Cpne9	441
chr5	113285422	113286566	1145	*	6.14989	6.8302	4.819	1.80303	6.17021e-08	1.10578e-05	Sgsm1	-5393
chr5	113306057	113308240	2184	*	6.95542	7.53069	5.9841	1.34105	1.01198e-05	0.0009824	Sgsm1	3637
chr5	113310116	113311249	1134	*	6.92244	7.43561	6.11859	1.11178	0.000126269	0.008471	Sgsm1	103
chr5	113313551	113314855	1305	*	6.20907	6.75082	5.33145	1.21311	7.19722e-05	0.00530654	Sgsm1	-3417
chr5	113323432	113325118	1687	*	7.54263	8.02721	6.80764	1.01487	0.000489555	0.0274167	Mir7229	270
chr5	113348182	113349477	1296	*	6.14886	6.68671	5.2816	1.19871	0.000234018	0.0143912	Aym1	-8464
chr5	113466834	113467958	1125	*	5.29552	6.01258	3.80618	1.99369	7.98884e-07	0.000104254	Wscd2	-83024
chr5	113490356	113491622	1267	*	7.06599	7.67076	6.00486	1.46029	1.48069e-06	0.000179991	Wscd2	-59431
chr5	113492232	113493254	1023	*	5.63926	6.35299	4.16517	1.97695	1.1743e-07	1.94679e-05	Wscd2	-57677
chr5	113516715	113517522	808	*	5.45403	6.05204	4.41416	1.42917	7.02886e-05	0.00519618	Wscd2	-33301
chr5	113552926	113555176	2251	*	7.3963	8.05569	6.14679	1.70331	1.54188e-07	2.43515e-05	Wscd2	3631
chr5	113558915	113559822	908	*	6.19869	6.74028	5.32151	1.21243	8.77119e-05	0.00628369	Wscd2	8949
chr5	113570314	113571406	1093	*	5.0204	5.77043	3.36829	2.186	4.76203e-06	0.000503296	Wscd2	20440
chr5	113672166	113673236	1071	*	5.86932	6.52848	4.62065	1.69918	1.80249e-06	0.000213809	Cmklr1	-22311
chr6	113794721	113796110	1390	*	6.68668	7.29078	5.6277	1.45697	4.87059e-06	0.00051282	Sec13	-54735
chr2	113828078	113829810	1733	*	7.87312	8.3647	7.12169	1.03845	0.000244197	0.0148855	Scg5	147
chr9	113833541	113834384	844	*	6.44982	5.85031	6.87207	-1.22382	7.17979e-05	0.00529837	Clasp2	21377
chr6	113889951	113892584	2634	*	7.52862	8.01106	6.79861	1.00776	0.000563697	0.0310272	Atp2b2	271
chr6	113922947	113924908	1962	*	7.6356	8.34249	6.1923	1.94456	8.13568e-09	1.89505e-06	Atp2b2	10753
chr6	113933154	113936196	3043	*	7.29825	7.9082	6.22055	1.48225	3.90609e-06	0.000421923	Atp2b2	6
chr6	113939102	113940460	1359	*	6.09499	6.75528	4.84208	1.70529	9.63908e-07	0.000122904	Atp2b2	-5100
chr6	113946820	113948599	1780	*	7.9441	8.64981	6.50598	1.93854	1.44994e-08	3.13236e-06	Atp2b2	-13029
chr6	114041003	114042045	1043	*	5.80183	6.44303	4.61863	1.61592	7.76632e-06	0.000777411	Atp2b2	556
chr6	114074366	114077067	2702	*	7.44878	7.98134	6.59544	1.18099	6.7141e-05	0.00497673	Atp2b2	-33637
chr5	114090593	114092124	1532	*	7.57072	8.30444	6.00184	2.09669	7.2317e-09	1.73788e-06	Svop	21
chr6	114093719	114095221	1503	*	7.67282	8.23051	6.75167	1.27399	0.000108451	0.00753005	Slc6a11	-36771
chr6	114130192	114133589	3398	*	7.84372	8.4701	6.71181	1.5533	2.83653e-06	0.000320913	Slc6a11	650
chr6	114143081	114144146	1066	*	6.21294	6.92742	4.73539	1.98346	3.37479e-08	6.48715e-06	Slc6a11	12373
chr6	114158860	114159568	709	*	5.17457	5.87976	3.73875	1.92777	3.01769e-06	0.000336871	Slc6a11	27973
chr6	114173436	114174564	1129	*	5.26385	5.96226	3.85761	1.89242	1.68168e-06	0.000201195	Slc6a11	42759
chr6	114209718	114210826	1109	*	6.31316	6.99309	4.98378	1.8016	1.84511e-07	2.86213e-05	Slc6a1	-72363
chr6	114213087	114217410	4324	*	7.78242	8.40499	6.66331	1.53666	1.23316e-06	0.000154171	Slc6a1	-67386
chr6	114292748	114294554	1807	*	7.45053	7.93243	6.72177	1.00592	0.000925951	0.0469672	Slc6a1	11016
chr5	114596014	114598293	2280	*	7.20145	7.76474	6.26461	1.29489	3.50857e-05	0.00284884	Fam222a	28903
chr4	115034480	115036456	1977	*	7.81509	8.38615	6.85602	1.32533	5.2724e-05	0.00404844	Tal1	-20958
chr11	115091177	115092237	1061	*	6.35818	6.97563	5.25608	1.51277	2.43499e-06	0.000280458	Rab37	276
chr10	115099725	115100794	1070	*	6.54102	7.07968	5.67163	1.20228	6.21479e-05	0.00466468	Tph2	84762
chr10	115103701	115104711	1011	*	6.07688	6.61112	5.21916	1.18553	0.000132933	0.00887522	Tph2	80816
chr10	115175287	115176210	924	*	5.58418	6.23198	4.37737	1.6452	7.47357e-06	0.000751766	Tph2	9273
chr10	115184269	115185445	1177	*	6.59969	7.3523	4.93387	2.21011	5.57251e-10	1.89668e-07	Tph2	165
chr4	115709376	115710296	921	*	5.83908	6.3599	5.01599	1.13717	0.000221434	0.0138109	Efcab14	-27934
chr5	115730718	115733775	3058	*	9.15432	9.75746	8.09837	1.45476	1.19394e-06	0.000149717	Bicdl1	-626
chr11	115809816	115810851	1036	*	5.24503	5.81886	4.27791	1.33179	0.000225336	0.0139915	Caskin2	3258
chr4	115897638	115898912	1275	*	7.13029	7.62188	6.37885	1.03806	0.000384419	0.0221383	6430628N08Rik	7609
chr10	116017281	116019712	2432	*	8.84878	9.50911	7.59575	1.70882	2.06995e-07	3.16717e-05	Ptprr	134
chr2	116368698	116369627	930	*	6.04621	5.55787	6.4104	-1.05439	0.000863499	0.044335	2810405F15Rik	-293067
chr5	116435492	116436272	781	*	5.30428	5.88641	4.31277	1.36463	0.000201022	0.0126801	Srrm4os	-2840
chr12	116460496	116461133	638	*	4.94751	5.58791	3.76712	1.60843	0.000243587	0.01487	Ptprn2	-24905
chr5	116484661	116486314	1654	*	7.08991	7.65836	6.13834	1.31464	3.07088e-05	0.00254626	Srrm4os	46766
chr12	116484926	116487361	2436	*	8.31892	9.09073	6.54588	2.33947	1.32974e-10	5.34648e-08	Ptprn2	424
chr12	116490810	116491288	479	*	3.73737	4.47769	2.13551	2.10852	0.000303802	0.0180311	Ptprn2	5329
chr5	116490048	116492307	2260	*	6.29924	7.01474	4.81708	1.98932	7.91079e-09	1.85301e-06	Srrm4os	52456
chr5	116498064	116500121	2058	*	8.39373	9.03102	7.2243	1.60204	3.88954e-07	5.54435e-05	Srrm4os	60371
chr5	116511900	116512568	669	*	4.25223	4.97966	2.71402	2.04152	0.000426889	0.0242327	Srrm4os	73512
chr5	116565360	116566993	1634	*	5.74097	6.66496	2.45676	3.97595	1.43087e-14	2.29459e-11	Srrm4	25640
chr5	116570084	116571491	1408	*	5.24274	5.96564	3.72611	2.02569	1.00504e-06	0.000127563	Srrm4	21029
chr12	116576248	116578702	2455	*	7.52336	8.30137	5.71362	2.3812	7.80164e-11	3.43693e-08	Ptprn2	91755
chr12	116580817	116582013	1197	*	5.31149	5.97036	4.06391	1.69568	4.95377e-06	0.000520921	Ptprn2	95695
chr5	116582652	116583071	420	*	3.90031	4.67482	2.11144	2.32697	9.34439e-05	0.00664547	Srrm4	8955
chr5	116588010	116594138	6129	*	10.012	10.9474	6.49768	4.24402	2.49825e-20	1.04163e-15	Srrm4	743
chr12	116596953	116597848	896	*	5.42813	6.07085	4.23955	1.62123	1.26274e-05	0.00119117	Ptprn2	111681
chr12	116601547	116603727	2181	*	6.42893	7.08819	5.17991	1.70106	1.73209e-07	2.70482e-05	Ptprn2	116917
chr12	116629574	116630607	1034	*	5.45054	6.00588	4.53591	1.26168	0.000239161	0.0146213	Ptprn2	144371
chr5	116661965	116662559	595	*	4.16845	4.92874	2.46088	2.23919	5.0108e-05	0.00388333	Srrm4	-70445
chr12	116743288	116744458	1171	*	6.39818	7.23879	4.14106	2.88579	1.79278e-12	1.37154e-09	Ptprn2	258153
chr12	116746027	116746917	891	*	4.93435	5.66446	3.38318	2.06533	1.99389e-06	0.000233523	Ptprn2	260752
chr5	116758530	116759501	972	*	5.62925	6.24005	4.54886	1.48257	7.9179e-05	0.00577155	Srrm4	-167199
chr12	116771434	116772570	1137	*	5.50903	6.28175	3.73067	2.33704	3.06855e-09	8.4172e-07	Ptprn2	286282
chr5	116885939	116888103	2165	*	7.3498	8.01184	6.09025	1.71596	1.69162e-06	0.000202096	Suds3	228972
chr5	116894427	116895894	1468	*	5.74066	6.47521	4.16769	2.09642	2.19035e-08	4.49879e-06	Suds3	220832
chr5	117023077	117024344	1268	*	6.0779	6.8374	4.37462	2.25261	5.01845e-09	1.29562e-06	Suds3	92282
chr12	117106692	117107817	1126	*	5.93033	6.72531	4.0141	2.49885	1.66574e-09	4.99656e-07	Gm10421	44014
chr12	117152896	117154697	1802	*	6.47443	7.21594	4.86651	2.14105	1.78125e-09	5.26725e-07	Gm10421	-2528
chr13	117601518	117604316	2799	*	7.29151	7.84353	6.38606	1.25239	0.000125414	0.008434	Hcn1	597
chr5	117670299	117671421	1123	*	5.32303	5.86354	4.44869	1.20658	0.000703365	0.0372636	Nos1	-195979
chr3	118430083	118431079	997	*	5.3732	6.18126	3.36823	2.59553	1.36413e-09	4.19753e-07	Mir137	-3276
chr3	118433395	118435613	2219	*	6.89216	7.56502	5.5909	1.76773	9.78399e-08	1.65492e-05	Mir137	647
chr11	118545476	118547064	1589	*	6.32874	7.00077	5.03071	1.76249	6.33015e-08	1.12463e-05	Engase	69438
chr11	118553842	118555316	1475	*	7.01974	7.79197	5.24426	2.34027	1.83425e-10	7.04869e-08	Engase	77747
chr11	118569655	118570459	805	*	4.97066	5.81651	2.66792	2.92159	3.55831e-09	9.63388e-07	Engase	93225
chr11	118573004	118574202	1199	*	6.22372	6.88664	4.96085	1.71812	2.33819e-07	3.53223e-05	Engase	96771
chr11	118576337	118578017	1681	*	6.33749	7.19572	3.92004	3.06187	4.08841e-13	4.09532e-10	Engase	100345
chr11	118583112	118585073	1962	*	7.4266	8.2866	4.99187	3.08609	5.07808e-14	6.82993e-11	Engase	107261
chr11	118609895	118610230	336	*	4.30114	4.92849	3.16595	1.54636	0.000822655	0.0425738	Engase	133231
chr11	118667095	118670957	3863	*	9.67641	10.2299	8.76695	1.25877	1.57946e-05	0.00142852	Rbfox3	92015
chr11	118696227	118697325	1099	*	5.27866	5.95634	3.95833	1.78629	3.26262e-06	0.000360353	Rbfox3	64265
chr11	118907894	118909938	2045	*	6.94526	7.64017	5.55396	1.87962	2.23959e-08	4.57738e-06	Rbfox3	656
chr7	119065820	119066896	1077	*	5.52468	6.22414	4.11388	1.89916	2.94112e-07	4.31032e-05	Gprc5b	-71147
chr7	119105334	119107092	1759	*	8.63162	9.22995	7.59079	1.43467	8.02309e-06	0.000798327	Gpr139	78325
chr9	119151394	119152778	1385	*	6.19255	6.86966	4.87446	1.78719	9.30536e-08	1.58684e-05	Acaa1b	5007
chr7	119183699	119185139	1441	*	5.45979	6.00827	4.56399	1.23626	0.000417361	0.0237565	Gpr139	119
chr7	119244692	119245300	609	*	5.13186	5.69471	4.19624	1.28898	0.000589456	0.0322111	Gpr139	-60458
chr6	119276234	119277757	1524	*	7.08208	7.64054	6.1588	1.27642	3.03681e-05	0.00252227	Cacna2d4	40472
chr6	119321427	119322374	948	*	5.32731	5.89633	4.37408	1.31335	0.000494238	0.0276419	Lrtm2	7303
chr6	119332113	119333629	1517	*	8.07726	8.61792	7.20255	1.21079	7.89344e-05	0.00575876	Lrtm2	-2105
chr9	119690601	119691860	1260	*	6.57025	7.33851	4.81779	2.31202	8.09158e-11	3.51432e-08	Scn10a	27801
chr10	119691537	119692827	1291	*	5.7602	6.46178	4.34017	1.91155	6.28083e-08	1.11913e-05	Grip1os2	69517
chr1	120340318	120342976	2659	*	7.41974	7.96309	6.53784	1.22028	0.000109758	0.00757667	C1ql2	1065
chr5	120427240	120427827	588	*	4.93621	5.64253	3.49544	1.93237	4.63115e-06	0.000491332	Lhx5	-4352
chr3	120813562	120815217	1656	*	7.00921	6.33018	7.46908	-1.34141	8.05636e-05	0.00584184	6530403H02Rik	72342
chr5	120953765	120954517	753	*	4.71331	5.31563	3.65993	1.44364	0.000799778	0.0416309	Oas1d	39323
chr5	121008593	121010551	1959	*	6.70348	7.48222	4.88936	2.38434	1.43373e-10	5.66621e-08	Rph3a	-34
chr5	121058390	121058990	601	*	4.22973	5.08746	1.81712	3.02495	6.97633e-07	9.26352e-05	Rph3a	-48598
chr5	121062894	121063633	740	*	4.69901	5.51165	2.66151	2.62395	2.00892e-07	3.08512e-05	Rph3a	-53172
chr5	121076507	121077979	1473	*	7.10134	8.01872	3.93402	3.87038	9.06443e-16	3.14947e-12	Rph3a	-67151
chr5	121110972	121112570	1599	*	6.9742	7.52225	6.07957	1.23733	5.42318e-05	0.00414893	Ptpn11	79626
chr6	121345377	121347164	1788	*	5.72152	6.3547	4.5664	1.57975	3.54561e-06	0.000386996	Slc6a12	-426
chr6	121351024	121352996	1973	*	6.24138	6.74146	5.46964	1.06592	0.000400193	0.022942	Slc6a12	5313
chr6	121355910	121356943	1034	*	5.48084	5.99893	4.66463	1.12674	0.000644252	0.0345489	Slc6a12	9730
chr6	121362438	121364868	2431	*	6.47509	7.00951	5.61691	1.18672	9.51041e-05	0.00674374	Slc6a12	16956
chr6	121365169	121368105	2937	*	7.42225	8.00772	6.42074	1.38184	9.15029e-06	0.000896527	Slc6a12	19940
chr7	121391651	121392715	1065	*	5.44228	6.27882	3.21952	2.84039	4.94525e-10	1.69703e-07	Hs3st2	-113
chr6	121426373	121429864	3492	*	6.74343	7.316	5.77997	1.33022	2.04084e-05	0.00179453	Iqsec3	45559
chr6	121439817	121442326	2510	*	7.87306	8.50311	6.72867	1.56945	6.23034e-07	8.40682e-05	Iqsec3	32606
chr6	121448104	121448957	854	*	4.93126	5.61145	3.60084	1.79673	2.56345e-05	0.0021947	Iqsec3	25147
chr7	121466168	121467042	875	*	5.41637	6.25658	3.16271	2.87354	1.4623e-09	4.43416e-07	Hs3st2	74309
chr7	121469864	121470781	918	*	4.65308	5.3817	3.10915	2.0539	2.23013e-05	0.00194121	Hs3st2	78027
chr6	121461627	121475561	13935	*	10.8287	11.583	9.15432	2.22446	4.58666e-13	4.39629e-10	Iqsec3	5084
chr6	121492763	121495120	2358	*	6.59632	7.29003	5.21009	1.87263	3.2758e-08	6.38134e-06	Iqsec3	-20264
chr6	121498708	121500096	1389	*	7.03674	7.71493	5.71433	1.79438	2.3647e-08	4.76814e-06	Iqsec3	-25724
chr6	121502602	121503634	1033	*	5.16339	5.76456	4.11365	1.44083	0.000238128	0.0145795	Iqsec3	-29440
chr6	121519608	121520651	1044	*	4.94463	5.58744	3.75573	1.61934	8.73042e-05	0.00627063	Iqsec3	-46452
chr6	121523524	121525236	1713	*	6.68278	7.25674	5.7153	1.33558	6.58971e-05	0.00489758	Iqsec3	-50702
chr7	121539551	121540111	561	*	4.38412	5.05607	3.08642	1.75236	0.0002639	0.0159235	4933432K03Rik	50005
chr7	121563481	121564558	1078	*	5.58999	6.32987	3.99036	2.12731	3.37625e-08	6.48715e-06	4933432K03Rik	25816
chr7	121595333	121596193	861	*	5.44589	6.33263	2.71852	3.38709	6.19185e-12	3.88219e-09	1700025J12Rik	5860
chr8	121704676	121706553	1878	*	6.73315	7.28155	5.83759	1.23831	8.83429e-05	0.00631262	Jph3	-24944
chr8	121729263	121732523	3261	*	7.8767	8.57196	6.48392	1.88275	1.29795e-07	2.11112e-05	Jph3	334
chr8	121759636	121761885	2250	*	7.4993	8.24324	5.87895	2.15815	1.16012e-08	2.57977e-06	Jph3	30202
chr8	121762308	121764290	1983	*	7.19417	8.03179	4.96248	2.86074	8.86763e-12	5.24442e-09	Jph3	32740
chr8	121764934	121766388	1455	*	6.11755	6.87498	4.4257	2.23911	7.22621e-10	2.38176e-07	Jph3	35102
chr8	121782599	121784570	1972	*	6.66049	7.33749	5.34284	1.78778	1.02485e-07	1.71954e-05	Klhdc4	45984
chr8	121811628	121812725	1098	*	6.03406	6.66551	4.88488	1.57288	3.50499e-06	0.000383542	Klhdc4	17392
chr4	123000255	123001865	1611	*	6.65807	6.16809	7.02316	-1.05761	0.000350239	0.0204096	Mycl	5129
chr8	123330878	123334659	3782	*	9.08818	9.66265	8.11921	1.33913	1.02176e-05	0.000990735	Spire2	56
chr7	123499051	123501834	2784	*	9.28347	10.184	6.37528	3.60299	4.55186e-15	9.62129e-12	Zkscan2	183
chr7	124198635	124199499	865	*	5.21477	5.99415	3.39675	2.38043	6.90574e-08	1.2149e-05	Hs3st4	216239
chr4	124276713	124278373	1661	*	7.0067	7.49534	6.26219	1.02808	0.000355461	0.020685	1700057H15Rik	208416
chr4	124396866	124397548	683	*	4.18558	4.87516	2.81667	1.8377	0.00041448	0.0236086	1700057H15Rik	88752
chr8	124398503	124399828	1326	*	6.60511	7.3272	5.09232	2.02727	6.38467e-09	1.59883e-06	Pgbd5	34770
chr8	124403735	124405139	1405	*	6.30728	7.08636	4.49104	2.38546	1.07277e-09	3.42749e-07	Pgbd5	29499
chr8	124432725	124436299	3575	*	9.68346	10.2353	8.77852	1.25261	4.83349e-06	0.000510202	Pgbd5	-576
chr8	124448264	124450699	2436	*	8.22526	9.15475	4.83525	4.10983	1.88589e-14	2.85931e-11	Pgbd5	-15546
chr4	124450488	124451523	1036	*	5.2722	5.89925	4.13805	1.55106	2.93208e-05	0.00244259	1700057H15Rik	34953
chr8	124450824	124452595	1772	*	6.09007	6.95541	3.60187	3.13698	1.15113e-11	6.62012e-09	Pgbd5	-17774
chr8	124454932	124456010	1079	*	5.67511	6.49687	3.57005	2.71066	2.06599e-09	5.94071e-07	Pgbd5	-21535
chr8	124460750	124462013	1264	*	6.93681	7.80538	4.41518	3.17909	2.14369e-13	2.32156e-10	Pgbd5	-27446
chr8	124568563	124570753	2191	*	8.46847	9.0456	7.49172	1.34938	1.13854e-05	0.00108878	Agt	48
chr8	124585252	124586855	1604	*	7.06873	7.59914	6.22101	1.17291	0.000204374	0.0128623	Capn9	9943
chr4	124630277	124630794	518	*	4.7801	5.50459	3.25593	2.03168	6.22293e-06	0.000637499	Pou3f1	-27110
chr8	124775283	124776672	1390	*	6.11819	6.6607	5.23852	1.21571	0.000318772	0.0187992	Trim67	-17041
chr8	124791547	124796598	5052	*	10.4232	11.1643	8.81767	2.14239	3.45395e-11	1.74146e-08	Trim67	1054
chr8	124832967	124834958	1992	*	7.72631	8.2721	6.8378	1.22952	2.61223e-05	0.00222959	2810004N23Rik	29066
chr4	124860440	124863095	2656	*	9.20266	9.93193	7.6556	2.07175	3.19185e-10	1.13746e-07	Maneal	403
chr4	124880688	124883098	2411	*	8.97367	9.82482	6.62299	2.99641	8.27541e-14	1.02997e-10	Epha10	108
chr4	124893960	124895454	1495	*	6.43273	7.15611	4.91389	2.03416	7.36749e-09	1.74574e-06	1700125G02Rik	75
chr4	124905720	124906508	789	*	5.03565	5.60865	4.07096	1.32801	0.000626528	0.0336851	1700125G02Rik	-11332
chr2	125134018	125134818	801	*	5.72774	6.60178	3.14749	3.23369	1.94346e-12	1.46003e-09	Ctxn2	-2274
chr2	125135403	125137191	1789	*	7.52205	8.09496	6.55759	1.33236	1.19343e-05	0.00113476	Ctxn2	-395
chr4	125288980	125290091	1112	*	5.78996	6.39631	4.72383	1.46451	2.11797e-05	0.00185521	Zc3h12a	-161655
chr4	125494565	125495376	812	*	4.55373	5.21766	3.28703	1.71456	0.000123937	0.00835488	Grik3	4275
chr4	125553338	125555337	2000	*	7.74576	8.59266	5.43367	2.95171	4.46637e-13	4.33077e-10	Mir692-2	49589
chr4	125556290	125557551	1262	*	6.60431	7.33332	5.0585	2.06709	2.94899e-09	8.1971e-07	Mir692-2	52172
chr4	125559439	125560421	983	*	5.29811	5.96503	4.01995	1.73388	9.34363e-06	0.000912361	Mir692-2	55181
chr4	125562662	125564275	1614	*	5.82159	6.39715	4.84941	1.34022	8.11161e-05	0.0058717	Mir692-2	58720
chr4	125584612	125585369	758	*	5.50797	6.24796	3.90779	2.12737	7.9307e-08	1.37206e-05	Mir692-2	80242
chr4	125789859	125791168	1310	*	6.03134	6.74817	4.54301	1.99595	1.05109e-08	2.3689e-06	2610028E06Rik	131889
chr7	126281414	126283207	1794	*	6.88695	7.57221	5.5359	1.8298	3.6071e-08	6.88313e-06	Sbk1	9815
chr1	126317261	126318144	884	*	5.17082	5.82341	3.94655	1.66545	1.31489e-05	0.00122923	Nckap5	175224
chr8	126391316	126393403	2088	*	6.77639	7.30143	5.94254	1.15344	7.87462e-05	0.00575006	Coa6	-30141
chr7	126821378	126823416	2039	*	9.08977	9.73122	7.90569	1.62111	4.39119e-07	6.18543e-05	Fam57b	-906
chr7	126922586	126924117	1532	*	6.04782	6.68214	4.88872	1.58581	4.24694e-06	0.000453454	Kctd13	-5527
chr7	126946332	126947491	1160	*	5.79638	6.436	4.61877	1.60864	2.65767e-06	0.000303174	Asphd1	2247
chr7	126948583	126953281	4699	*	9.5626	10.2858	8.04437	2.03705	2.70486e-10	9.80675e-08	Sez6l2	397
chr4	127137930	127138882	953	*	5.23486	5.85873	4.11139	1.53711	0.000115655	0.00791172	Tmem35b	12363
chr4	127167384	127170844	3461	*	9.10823	9.65309	8.22225	1.22658	3.44279e-05	0.00279815	Dlgap3	-90
chr4	127327155	127328902	1748	*	7.10565	7.70096	6.07415	1.42131	8.85306e-06	0.000870576	Gjb3	1096
chr2	127537008	127538389	1382	*	7.43613	8.01021	6.46827	1.33687	3.94583e-05	0.00317501	Prom2	3718
chr4	127542983	127544114	1132	*	6.8974	7.64741	5.2454	2.19466	8.75487e-09	2.01118e-06	Gjb5	-185385
chr4	127549292	127549898	607	*	4.89343	5.49733	3.8351	1.45085	0.000359854	0.020926	Gjb5	-191431
chr4	127747275	127749737	2463	*	8.7971	9.43021	7.6422	1.58352	1.54948e-06	0.00018726	CK137956	222335
chr6	127752464	127754025	1562	*	6.25234	6.98271	4.69993	2.07381	2.63748e-08	5.2366e-06	Prmt8	15910
chr6	127760203	127761409	1207	*	5.49086	6.27947	3.61564	2.44834	8.57996e-09	1.98192e-06	Prmt8	8349
chr6	127766684	127769454	2771	*	8.3291	9.18689	5.91594	3.06456	2.70118e-13	2.8878e-10	Prmt8	1086
chr6	127770065	127772029	1965	*	5.54644	6.35013	3.57184	2.56242	1.27049e-09	3.95318e-07	Prmt8	-1888
chr4	127854909	127855862	954	*	4.83648	5.57203	3.25857	2.09622	5.38887e-06	0.000561715	CK137956	115455
chr1	127859446	127861130	1685	*	7.12756	6.40309	7.60761	-1.40703	6.79268e-06	0.000688256	Rab3gap1	-8485
chr4	127889070	127889684	615	*	4.19335	5.01618	2.08015	2.6974	1.07208e-05	0.00103353	CK137956	81464
chr4	127961371	127962233	863	*	4.78655	5.49072	3.35522	1.9194	5.73808e-05	0.00435389	CK137956	9039
chr4	127968244	127971880	3637	*	8.06058	8.96884	5.03989	3.72022	1.03879e-15	3.33169e-12	CK137956	779
chr4	127985056	127988518	3463	*	8.26661	9.16321	5.4127	3.54297	8.00982e-16	2.90417e-12	Csmd2	-1257
chr4	127988960	127990094	1135	*	5.12735	5.88718	3.42226	2.24841	4.9927e-06	0.000524353	Csmd2	1483
chr4	128084132	128085316	1185	*	5.85739	6.61615	4.15823	2.24644	2.27813e-09	6.48365e-07	Csmd2os	81873
chr4	128264595	128265987	1393	*	6.7301	7.37562	5.53151	1.6377	8.24874e-07	0.000106976	Hmgb4os	4247
chr4	128268847	128269722	876	*	5.92075	6.46901	5.02556	1.23647	0.000110048	0.00758962	Hmgb4os	8241
chr4	128271484	128273594	2111	*	7.59913	8.09354	6.84098	1.04786	0.000368137	0.0213185	Hmgb4os	11495
chr4	128317022	128318345	1324	*	5.20007	5.75512	4.28626	1.25992	0.000608256	0.0329363	Hmgb4os	56640
chr4	128328512	128329906	1395	*	6.21806	6.84391	5.08795	1.54887	1.10191e-05	0.00105739	Hmgb4os	68165
chr4	128397874	128398322	449	*	3.84982	4.58754	2.26109	2.09554	0.000278213	0.0166809	Hmgb4os	137054
chr5	128407037	128408640	1604	*	6.79005	7.55376	5.06338	2.28249	1.37238e-10	5.44957e-08	Tmem132d	25238
chr4	128411767	128412660	894	*	5.16738	5.91793	3.5125	2.18962	9.02233e-07	0.000115926	Hmgb4os	151170
chr4	128427417	128430084	2668	*	8.67777	9.21388	7.81515	1.19437	0.000112662	0.00774509	Hmgb4os	167707
chr6	128468951	128470161	1211	*	5.37772	6.00684	4.23652	1.56049	1.99051e-05	0.00176206	Gm10069	30799
chr5	128877156	128878144	989	*	5.22648	5.86021	4.06945	1.58035	2.68367e-05	0.00227427	Rimbp2	75836
chr5	128952389	128953584	1196	*	5.95651	6.53665	4.97088	1.35865	0.000184125	0.0117745	Rimbp2	499
chr4	129112801	129114278	1478	*	7.73798	8.32329	6.73693	1.38146	3.11208e-05	0.00257453	Hpca	6632
chr4	129120120	129122035	1916	*	7.51004	7.99497	6.77423	1.01601	0.000560254	0.0308784	Hpca	225
chr4	129122974	129127117	4144	*	9.35357	9.94818	8.32425	1.41966	2.60636e-06	0.000298546	Hpca	-3121
chr2	129710582	129711354	773	*	4.82485	5.51946	3.43478	1.86926	6.06413e-05	0.00457509	Pdyn	-11030
chr10	130278901	130280963	2063	*	7.50546	8.3349	5.34062	2.78678	3.47183e-12	2.4126e-09	Neurod4	206
chr4	131191131	131192098	968	*	5.63841	6.20334	4.69686	1.2987	0.000102279	0.00715518	A930031H19Rik	-181141
chr7	131950360	131951277	918	*	4.67223	5.47788	2.68414	2.56845	1.41619e-07	2.27106e-05	Gpr26	-15641
chr1	132734334	132735861	1528	*	6.36383	6.939	5.39284	1.33981	1.2162e-05	0.00115378	Gm10538	5745
chr2	132741857	132742704	848	*	5.90945	6.55431	4.71324	1.63284	1.65957e-06	0.000198836	Chgb	-39361
chr2	132776879	132778007	1129	*	5.29896	6.10584	3.30233	2.58479	4.14874e-07	5.87367e-05	Chgb	-4199
chr2	132780918	132782495	1578	*	9.01813	9.81283	7.10369	2.5042	1.76664e-12	1.36406e-09	Chgb	65
chr4	134017020	134021023	4004	*	8.86062	9.74469	6.16562	3.37302	1.36021e-15	4.05094e-12	Lin28a	-206
chr4	134041539	134042243	705	*	5.75826	6.25613	4.99184	1.05762	0.000682397	0.0362679	Lin28a	-23075
chr4	134065132	134066041	910	*	5.14105	5.84596	3.7065	1.92615	1.85861e-06	0.0002186	Crybg2	-2865
chr4	134081109	134082667	1559	*	7.08767	7.58537	6.32166	1.05869	0.000348775	0.0203527	Cd52	13185
chr5	134151774	134152505	732	*	4.76465	3.77164	5.34728	-1.76988	2.80245e-05	0.00236054	Rcc1l	24627
chr5	134546200	134548232	2033	*	7.91276	8.46761	6.99951	1.26339	0.000158845	0.010354	Clip2	5218
chr1	134665602	134667998	2397	*	8.20607	8.8761	6.91588	1.7553	8.02174e-08	1.38208e-05	Syt2	20188
chr6	134886043	134889365	3323	*	9.37275	10.2089	7.15349	2.85044	2.52548e-12	1.83128e-09	Gpr19	81
chr1	135614738	135617696	2959	*	8.68243	9.21374	7.83237	1.17702	6.07987e-05	0.00457989	Gm4793	18441
chr1	135618557	135620513	1957	*	8.4349	8.96172	7.59645	1.16085	0.000175551	0.0112694	Gm4793	21759
chr5	135804260	135805173	914	*	4.7444	5.46572	3.2352	2.01323	2.48654e-05	0.00214204	Srrm3	-13389
chr5	135805857	135808113	2257	*	8.44011	9.22584	6.58297	2.43751	1.4008e-11	7.89263e-09	Srrm3	-11121
chr5	135809550	135810070	521	*	3.96237	4.77499	1.92501	2.60726	2.50187e-05	0.00215303	Srrm3	-8296
chr5	135812705	135813588	884	*	5.53675	6.14779	4.45558	1.48336	2.27473e-05	0.0019718	Srrm3	-4959
chr5	135834206	135836577	2372	*	9.17755	9.86407	7.82134	1.83825	6.22181e-08	1.11099e-05	Srrm3	17286
chr5	135840980	135842759	1780	*	7.60016	8.46318	5.13548	3.11955	5.18572e-14	6.864e-11	Srrm3	23764
chr5	135850019	135851772	1754	*	7.12137	7.90568	5.2731	2.42509	4.12779e-11	2.04888e-08	Srrm3	32790
chr5	135853062	135854671	1610	*	6.8486	7.55204	5.42048	1.9248	3.87967e-08	7.30297e-06	Hspb1	-34052
chr5	135866449	135867416	968	*	6.13725	6.87219	4.5624	2.10049	3.11755e-08	6.13135e-06	Hspb1	-20986
chr2	136710890	136715109	4220	*	9.02553	9.9148	6.26695	3.44193	2.95684e-16	1.46942e-12	Snap25	-450
chr2	136720022	136720742	721	*	5.00586	5.70629	3.59086	1.90117	5.13328e-06	0.000537763	Snap25	6696
chr2	136777490	136779213	1724	*	6.53283	7.06991	5.6676	1.19649	7.21173e-05	0.00531254	Snap25	64666
chr4	136904570	136905835	1266	*	5.15965	5.97416	3.10861	2.64487	7.13059e-09	1.72852e-06	C1qa	-6359
chr4	136907003	136908391	1389	*	6.37564	7.0083	5.22231	1.57898	2.60288e-06	0.000298546	C1qa	-8853
chr4	136934643	136935471	829	*	5.37814	6.01541	4.20877	1.59669	8.2837e-06	0.000819418	Epha8	21759
chr4	136942301	136943528	1228	*	5.76566	6.34676	4.77718	1.36186	3.64823e-05	0.00295075	Epha8	13901
chr4	136949254	136950386	1133	*	6.25209	6.77032	5.43556	1.12875	0.000178431	0.0114455	Epha8	6996
chr4	136966384	136967727	1344	*	6.15198	6.69774	5.26358	1.22769	9.22379e-05	0.00656843	Epha8	-10240
chr5	137025063	137034727	9665	*	10.6234	11.2284	9.56155	1.46277	1.71408e-07	2.68172e-05	Vgf	-400
chr6	137045967	137047327	1361	*	6.15228	5.49164	6.60372	-1.31349	3.14899e-05	0.00259477	Pde6h	92124
chr7	137552496	137553787	1292	*	7.17213	7.80784	6.00819	1.594	1.26609e-06	0.000157344	Gm12669	115468
chr5	137552786	137554751	1966	*	8.2233	8.92537	6.80113	1.9192	2.08453e-08	4.31332e-06	Actl6b	223
chr5	137569341	137570421	1081	*	6.02881	6.56696	5.16075	1.19964	0.000372464	0.0215242	Tfr2	41
chr5	137574058	137575319	1262	*	7.61931	8.11046	6.86891	1.03687	0.000388985	0.0223858	Tfr2	3714
chr7	137824959	137825993	1035	*	5.41863	6.09325	4.11041	1.7719	2.20843e-06	0.000256489	Gm12669	387802
chr7	137956924	137958852	1929	*	6.48857	7.17542	5.131	1.83707	1.97752e-07	3.0425e-05	Tcerg1l	439842
chr7	138054355	138055286	932	*	4.82633	5.51245	3.47177	1.82581	3.25907e-05	0.00267228	Tcerg1l	342909
chr7	138304895	138306292	1398	*	6.82342	7.31676	6.06783	1.04368	0.000330152	0.0194019	Tcerg1l	92136
chr7	138315294	138315694	401	*	3.56775	4.32511	1.8763	2.20805	0.000373123	0.021546	Tcerg1l	82236
chr7	138395882	138399689	3808	*	10.0504	10.8176	8.30403	2.30919	3.29518e-12	2.30909e-09	Tcerg1l	-56
chr7	138472250	138473831	1582	*	8.05146	8.536	7.31658	1.01494	0.000349988	0.0204092	Tcerg1l	-75311
chr4	138596702	138597696	995	*	4.91265	5.56368	3.69409	1.65691	4.41114e-05	0.00348664	Vwa5b1	26793
chr4	138603177	138604263	1087	*	5.33642	5.89533	4.41185	1.27487	0.000250565	0.0152069	Vwa5b1	20272
chr3	138721508	138722904	1397	*	7.36085	6.81217	7.75739	-1.14822	7.9387e-05	0.00578166	4930425O10Rik	4778
chr5	139082257	139083230	974	*	6.31895	5.73249	6.73474	-1.20415	6.4692e-05	0.00482522	Prkar1b	47008
chr7	139822383	139823476	1094	*	5.31795	5.88119	4.3812	1.29117	0.000400462	0.022942	Adgra1	-11244
chr4	139885257	139885931	675	*	5.24827	5.87989	4.09851	1.57075	5.82947e-05	0.0044152	4933427I22Rik	47480
chr4	139912769	139913650	882	*	5.27048	5.97194	3.85101	1.90853	8.80643e-07	0.000113502	4933427I22Rik	19864
chr4	139925288	139926646	1359	*	5.71621	6.31663	4.66882	1.43976	2.11016e-05	0.00185213	4933427I22Rik	7107
chr4	140028999	140031121	2123	*	9.10249	9.59272	8.35424	1.03427	0.000474721	0.0267604	Klhdc7a	-62034
chr4	140108859	140109772	914	*	5.71098	6.28749	4.73605	1.34372	4.64e-05	0.00364679	Gm13029	-33557
chr4	140147715	140148887	1173	*	6.32914	6.83153	5.5518	1.07391	0.000255068	0.015413	Gm13029	5428
chr4	140243846	140244945	1100	*	5.14475	5.77444	4.00161	1.56193	5.0297e-05	0.00389435	Igsf21	2415
chr4	140245375	140247633	2259	*	7.97055	8.56496	6.94183	1.41834	5.78705e-06	0.000597988	Igsf21	307
chr4	140249088	140249813	726	*	5.23858	5.78787	4.34059	1.23859	0.000602937	0.0327546	Igsf21	-2640
chr4	140273711	140274833	1123	*	5.51076	6.2111	4.09615	1.90383	1.60154e-06	0.000192714	Igsf21	-27461
chr4	140328133	140328837	705	*	4.63947	5.35653	3.15011	1.98848	1.44034e-05	0.00132423	Gm13016	-51982
chr4	140357344	140359757	2414	*	7.27866	7.99827	5.77746	2.01457	5.39823e-09	1.37661e-06	Gm13016	-21916
chr4	140380372	140381501	1130	*	5.58504	6.39608	3.55902	2.62137	3.08388e-10	1.10846e-07	Gm13016	470
chr4	140401645	140402373	729	*	4.74571	5.44185	3.34919	1.87731	2.64946e-05	0.00224986	Gm13016	21542
chr4	140405344	140409237	3894	*	7.70346	8.34278	6.52687	1.61076	4.43391e-07	6.23507e-05	Gm13016	26824
chr4	140411907	140413545	1639	*	8.26887	8.8967	7.13207	1.5599	1.34985e-06	0.000165777	Gm13016	32259
chr4	140418922	140420873	1952	*	8.88233	9.46441	7.89092	1.36912	6.32601e-06	0.00064647	Gm13016	39431
chr4	140445307	140449284	3978	*	8.61914	9.29581	7.30281	1.78831	1.77157e-07	2.76129e-05	Gm13016	66829
chr4	140452208	140453491	1284	*	6.60365	7.23179	5.46579	1.55955	6.26182e-07	8.43565e-05	Gm13016	72383
chr4	140454082	140454735	654	*	5.53714	6.31885	3.7049	2.39954	1.09903e-08	2.45702e-06	Gm13016	73942
chr3	141810615	141811711	1097	*	5.52218	6.29891	3.72009	2.36455	8.65015e-09	1.99262e-06	Bmpr1b	120257
chr3	141818957	141820407	1451	*	6.87173	7.52068	5.66076	1.65374	2.83033e-07	4.16259e-05	Bmpr1b	111738
chr5	141980585	141981316	732	*	5.01364	5.76998	3.32772	2.22511	1.29439e-06	0.00016022	Foxk1	-420546
chr6	142543243	142544387	1145	*	5.69351	5.17358	6.07489	-1.10243	0.000367187	0.0212782	Kcnj8	27799
chr5	142677663	142678710	1048	*	5.72142	6.25069	4.87666	1.16694	0.000334582	0.019622	Slc29a4	-23914
chr5	142681379	142682346	968	*	5.71347	6.23485	4.88896	1.13874	0.000477263	0.0268403	Slc29a4	-20238
chr5	142691759	142693186	1428	*	7.23392	7.87952	6.03501	1.63886	5.1862e-07	7.12475e-05	Slc29a4	-9628
chr3	143040320	143041031	712	*	5.47119	4.57422	6.0201	-1.64413	2.82002e-05	0.00236578	4930519L02Rik	10062
chr2	143217914	143218560	647	*	4.31004	5.07356	2.58442	2.26314	1.35636e-05	0.00125953	Otor	139844
chr2	143500471	143502350	1880	*	6.81922	7.41644	5.78184	1.42874	2.6225e-06	0.000299573	Pcsk2	-44722
chr2	143544376	143549446	5071	*	9.64042	10.3089	8.35629	1.74829	1.87785e-08	3.97441e-06	Pcsk2	778
chr2	143581781	143583174	1394	*	5.14507	5.78532	3.96521	1.60892	6.5319e-05	0.00486329	Pcsk2os1	-34641
chr2	143583676	143584231	556	*	4.79465	5.46244	3.51316	1.735	5.44612e-05	0.00415885	Pcsk2os1	-36117
chrX	143902230	143904628	2399	*	6.97919	7.77043	5.08719	2.47528	2.66395e-10	9.70063e-08	Dcx	29695
chrX	143905570	143907298	1729	*	7.03111	7.6406	5.95494	1.47999	2.94758e-06	0.00033028	Dcx	26690
chrX	143909024	143909743	720	*	4.46003	5.08837	3.32146	1.5522	0.000859367	0.0441539	Dcx	23740
chrX	143930256	143931473	1218	*	5.27666	5.86331	4.27158	1.38236	0.000136699	0.00909329	Dcx	2259
chr1	144085692	144086606	915	*	6.56411	5.94974	6.99363	-1.24599	0.000118461	0.0080574	Rgs2	-82000
chr7	144282912	144285293	2382	*	8.4463	9.2455	6.50212	2.53791	2.24135e-11	1.21366e-08	Shank2	-291
chr7	144383895	144385347	1453	*	5.65216	6.21933	4.70425	1.30722	0.000136287	0.00907735	Cttn	86314
chr5	144542741	144543297	557	*	4.13128	4.8502	2.63333	1.9928	0.000167243	0.0108063	Nptx2	-2868
chr5	144545046	144548224	3179	*	8.50081	9.22381	6.98369	2.03518	7.35258e-09	1.74574e-06	Nptx2	748
chr6	145669343	145670191	849	*	5.58642	5.00701	5.99867	-1.19235	0.000339136	0.0198458	Tuba3b	53804
chr6	146316611	146317396	786	*	5.37282	4.54567	5.89524	-1.54783	8.48458e-05	0.00611513	Itpr2	185219
chr5	146628157	146629267	1111	*	5.23449	5.77674	4.35553	1.2126	0.000529376	0.0293512	Gpr12	-43473
chr3	146766243	146767699	1457	*	6.04961	5.57202	6.40781	-1.03773	0.000796208	0.0414709	Prkacb	3267
chr4	147960171	147960967	797	*	6.9262	7.60694	5.59353	1.80701	2.41511e-08	4.85286e-06	2510039O18Rik	19674
chr4	147962235	147963693	1459	*	6.32321	7.1002	4.51954	2.3708	3.8278e-10	1.34682e-07	2510039O18Rik	22069
chr4	147984341	147988789	4449	*	8.83329	9.74938	5.68778	3.8546	4.49946e-16	2.03126e-12	Nppb	777
chr4	147992364	147994133	1770	*	5.70631	6.4016	4.31336	1.87815	2.55018e-07	3.8179e-05	Nppb	7461
chr4	147999539	148003209	3671	*	8.48245	9.3635	5.82304	3.33386	9.43941e-15	1.74921e-11	Nppa	652
chr4	148008284	148009140	857	*	5.27692	6.01937	3.6642	2.14077	7.26304e-07	9.59838e-05	Nppa	7990
chr5	148026290	148027788	1499	*	7.07675	7.63717	6.14795	1.2839	2.92465e-05	0.00243884	Mtus2	69719
chr5	148052634	148054344	1711	*	7.26855	7.9035	6.10727	1.59068	1.75783e-06	0.000209107	Mtus2	96169
chr5	148063527	148064139	613	*	4.64933	5.59055	1.00287	4.30628	5.82893e-11	2.70038e-08	Mtus2	106513
chr5	148069434	148070474	1041	*	5.93352	6.62975	4.53663	1.88392	2.17466e-07	3.30918e-05	Mtus2	112634
chr5	148075681	148077713	2033	*	7.65518	8.43922	5.80864	2.42421	3.01599e-11	1.55247e-08	Mtus2	119377
chr5	148090031	148091009	979	*	5.69069	6.36754	4.3736	1.78432	3.57779e-07	5.15795e-05	Mtus2	133200
chr5	148094509	148095024	516	*	4.77668	5.49313	3.29015	1.9857	1.64152e-05	0.00147664	Mtus2	137447
chr4	148204385	148205018	634	*	4.32458	5.09126	2.58111	2.28336	3.28663e-05	0.00268695	Fbxo2	44034
chr4	148214043	148214645	603	*	4.63677	5.28966	3.41136	1.66353	0.000118411	0.0080574	Fbxo2	53676
chr4	148283949	148285351	1403	*	6.53008	7.45283	3.26848	3.96433	2.76856e-15	7.21462e-12	Disp3	3315
chr4	148285867	148289407	3541	*	9.77402	10.4898	8.29063	1.99481	1.85271e-10	7.08694e-08	Disp3	328
chr4	148293467	148295792	2326	*	6.48326	7.26413	4.65614	2.39859	1.33789e-10	5.34648e-08	Disp3	-6665
chr4	148306049	148307340	1292	*	6.87867	7.62689	5.23607	2.18345	2.60668e-09	7.31247e-07	Disp3	-18730
chr4	148313145	148314664	1520	*	6.59059	7.2972	5.1485	1.94128	4.71464e-08	8.69798e-06	Disp3	-25940
chr4	148315312	148316360	1049	*	5.7104	6.43053	4.20675	2.01315	9.4673e-08	1.61116e-05	Disp3	-27871
chr4	148321870	148322787	918	*	5.50652	6.04689	4.63256	1.20653	0.000361952	0.0210187	Disp3	-34364
chr4	148325721	148327512	1792	*	5.83333	6.5796	4.20093	2.16783	1.71106e-08	3.63988e-06	Disp3	-38652
chr4	148337958	148338954	997	*	5.28568	5.8933	4.21549	1.46819	8.90644e-05	0.00635872	Disp3	-50491
chr5	148923652	148924996	1345	*	5.61009	4.83785	6.11037	-1.47244	0.000288659	0.0172676	Katnal1	4323
chr4	151170296	151173374	3079	*	7.81549	8.39686	6.8262	1.36582	9.20656e-06	0.00090003	Gm13090	82265
chr4	151178354	151179895	1542	*	6.48461	7.21773	4.9187	2.09086	6.4397e-09	1.60779e-06	Gm13090	89555
chr4	151180457	151181860	1404	*	6.33132	7.01278	4.99576	1.80928	1.32423e-07	2.14836e-05	Gm13090	91589
chr4	151185981	151186705	725	*	4.92085	3.92001	5.50609	-1.78133	1.14463e-05	0.00109335	Gm13090	96773
chr4	151194031	151195342	1312	*	6.17163	6.9064	4.5976	2.0996	1.97607e-08	4.14027e-06	Gm13090	105117
chr4	151204299	151205543	1245	*	6.03447	6.85552	3.93473	2.70747	1.32684e-11	7.57834e-09	Gm13090	115351
chr4	151211766	151213472	1707	*	7.0295	7.68441	5.79668	1.68174	3.58667e-07	5.15795e-05	Gm13090	123049
chr4	151216437	151217146	710	*	5.255	5.96594	3.79356	1.95952	1.57908e-06	0.000190561	Gm13090	127222
chr4	151228257	151229444	1188	*	5.91959	6.4816	4.98632	1.28821	3.99425e-05	0.00320266	Gm13090	139281
chr4	151238844	151240149	1306	*	7.69417	8.34758	6.4669	1.67545	1.27405e-07	2.07909e-05	Gm13090	149927
chr4	151250568	151251194	627	*	4.52174	5.3181	2.59649	2.49475	1.84233e-06	0.000217298	Gm13090	161311
chr4	151262124	151264432	2309	*	7.95696	8.63117	6.65037	1.77568	1.00939e-07	1.69702e-05	Gm13090	173708
chr4	151270244	151271372	1129	*	5.65097	6.22077	4.69554	1.31737	7.28773e-05	0.00535433	Gm13090	181238
chr4	151285562	151287604	2043	*	7.6022	8.43246	5.43079	2.79439	8.86887e-13	7.54659e-10	Gm13090	197013
chr4	151291029	151291813	785	*	5.07177	5.94537	2.49635	3.21835	5.75822e-10	1.94619e-07	Gm13090	201851
chr4	151300924	151304090	3167	*	8.28151	8.77638	7.52227	1.0497	0.000229811	0.0142164	Gm13090	212937
chr4	151326019	151326815	797	*	5.4413	5.99523	4.53058	1.25647	0.000214638	0.0134373	Gm13090	236847
chr4	151366698	151367787	1090	*	5.76804	6.26865	4.99501	1.06686	0.00090458	0.0460232	Gm13090	277673
chr4	151453947	151456328	2382	*	7.29264	7.80106	6.50056	1.09556	0.000168318	0.0108553	Gm13090	365568
chr4	151473314	151475395	2082	*	8.09869	8.75045	6.87744	1.6681	1.37726e-07	2.21715e-05	Gm13090	384785
chr4	151482803	151484347	1545	*	6.90795	7.39685	6.16285	1.02887	0.000348694	0.0203527	Camta1	378193
chr4	151549931	151551698	1768	*	7.52552	8.08547	6.59804	1.28247	5.72285e-05	0.00434629	Camta1	310953
chr4	151568757	151570445	1689	*	6.76961	7.54764	4.95973	2.37951	2.37232e-10	8.8711e-08	Camta1	292167
chr4	151577455	151578902	1448	*	6.43727	7.13996	5.01242	1.91973	9.66868e-09	2.2029e-06	Camta1	283589
chr4	151586202	151586833	632	*	4.17968	5.03418	1.79787	2.99093	3.52121e-07	5.09775e-05	Camta1	275250
chr4	151594541	151596133	1593	*	6.97865	7.80905	4.80613	2.79387	7.53675e-13	6.54669e-10	Camta1	266431
chr4	151603738	151605331	1594	*	6.8878	6.33075	7.28867	-1.16054	6.06801e-05	0.00457509	Camta1	257233
chr4	151613998	151615059	1062	*	5.63639	6.31419	4.31556	1.78867	4.97492e-07	6.85709e-05	Camta1	247239
chr4	151629901	151632602	2702	*	8.67338	9.36079	7.31347	1.84262	1.76681e-08	3.74891e-06	Camta1	230516
chr4	151632896	151637065	4170	*	8.99729	9.4964	8.22787	1.0643	0.000203706	0.0128299	Camta1	226787
chr4	151642401	151646229	3829	*	8.78349	9.27227	8.03867	1.02934	0.00032865	0.0193407	Camta1	217453
chr4	151665743	151667172	1430	*	6.36466	7.06543	4.94818	1.90931	5.73493e-08	1.03963e-05	Camta1	195310
chr4	151729254	151730157	904	*	5.04304	5.82141	3.23108	2.37189	2.73818e-07	4.07013e-05	Camta1	132062
chr4	151750891	151755408	4518	*	7.69751	8.27221	6.72785	1.33946	6.97049e-06	0.000705415	Camta1	108618
chr4	151755691	151757064	1374	*	5.58755	6.26201	4.27998	1.77182	1.25432e-06	0.000156114	Camta1	105390
chr4	151764765	151766997	2233	*	6.3163	7.077	4.60643	2.26121	4.71169e-10	1.63759e-07	Camta1	95887
chr4	151771732	151773474	1743	*	6.11349	6.77627	4.85117	1.71711	1.90518e-07	2.93662e-05	Camta1	89165
chr2	151788412	151789196	785	*	5.50134	6.07046	4.54787	1.31424	0.000867266	0.0444715	4930556L07Rik	-37339
chr4	151792650	151794754	2105	*	6.95642	7.44536	6.21123	1.02904	0.000983431	0.049184	Camta1	68066
chr2	151893397	151895519	2123	*	6.8893	7.44253	5.9805	1.25656	3.03517e-05	0.00252227	Angpt4	-16749
chr2	151909797	151912161	2365	*	8.23774	8.74586	7.4464	1.095	0.000121369	0.00820166	Angpt4	-228
chr2	151915625	151916817	1193	*	6.22761	6.76196	5.36959	1.18618	8.23466e-05	0.00595559	Angpt4	5014
chr2	151937395	151939856	2462	*	8.12539	8.62105	7.36426	1.05232	0.000590253	0.0322335	Angpt4	27419
chr2	151972954	151974840	1887	*	7.17973	7.69739	6.36465	1.1277	0.000597274	0.0325105	Fam110a	84
chr2	152076969	152077947	979	*	5.37314	6.14744	3.58553	2.34674	1.54915e-08	3.32088e-06	Scrt2	-4071
chr2	152080427	152083834	3408	*	8.87714	9.3954	8.06053	1.13058	9.58838e-05	0.00677878	Scrt2	602
chr2	152092179	152094348	2170	*	7.05954	7.72997	5.76778	1.75612	5.25473e-07	7.20702e-05	Scrt2	11735
chr4	152349749	152352611	2863	*	8.56274	9.23812	7.25153	1.78187	1.43925e-07	2.29851e-05	Chd5	12526
chr4	152353003	152355330	2328	*	8.06755	8.85427	6.2043	2.44418	1.29756e-10	5.27815e-08	Chd5	15513
chr4	152356056	152357526	1471	*	5.73422	6.35429	4.62348	1.52244	5.49693e-06	0.000571551	Chd5	18137
chr4	152360397	152362695	2299	*	6.73256	7.28126	5.83619	1.23945	0.000128668	0.00861114	Chd5	22892
chr4	152365009	152365990	982	*	5.91369	6.46481	5.0107	1.24713	6.15276e-05	0.00463062	Chd5	26846
chr4	152410507	152413700	3194	*	7.60298	8.13121	6.76091	1.16549	0.000226077	0.014027	Kcnab2	36751
chr4	152417432	152420591	3160	*	8.91008	9.60243	7.5296	1.86823	1.64598e-08	3.51039e-06	Kcnab2	29843
chr4	152427674	152429018	1345	*	6.12947	6.77498	4.93086	1.63645	1.13888e-06	0.000143676	Kcnab2	20509
chr4	152779171	152779963	793	*	5.51278	6.17447	4.25457	1.71	4.02629e-06	0.000432109	Gm833	82027
chr4	152815966	152817045	1080	*	5.43021	6.11902	4.06451	1.8434	1.04953e-06	0.000132806	Gm833	118966
chr4	152833630	152834996	1367	*	5.64328	6.22049	4.66629	1.34635	0.000162377	0.0105292	Gm833	136773
chr1	152953598	152957140	3543	*	9.1069	9.82031	7.63427	1.98147	5.78183e-09	1.46103e-06	Nmnat2	268
chr1	152974737	152975746	1010	*	5.72069	6.42525	4.28764	1.9271	4.83625e-07	6.69917e-05	Nmnat2	20141
chr1	152992536	152993288	753	*	4.42179	5.13578	2.94652	1.96915	5.39383e-05	0.00413026	Nmnat2	37811
chr1	152994219	152995505	1287	*	5.41736	5.97979	4.48291	1.28851	0.000246491	0.0150034	Nmnat2	39761
chr1	153010395	153012395	2001	*	6.98945	7.53313	6.10666	1.22116	8.00983e-05	0.00582329	Nmnat2	56294
chr2	153030262	153034289	4028	*	8.88618	9.70697	6.78845	2.71329	1.2149e-12	9.83589e-10	Xkr7	424
chr2	153048075	153050031	1957	*	6.32339	7.07065	4.68584	2.17583	1.13788e-09	3.60787e-07	Ccm2l	-16902
chr2	153070563	153073015	2453	*	8.14726	8.71032	7.21103	1.29468	2.90707e-05	0.00242903	Ccm2l	5834
chr2	153084087	153084775	689	*	6.08218	6.69771	4.98637	1.50406	2.47797e-05	0.00213687	Ccm2l	18476
chr2	153107355	153109454	2100	*	6.7725	7.3664	5.74536	1.41513	9.00906e-06	0.000884872	Hck	-63
chr4	153175298	153176190	893	*	5.742	6.51702	3.95008	2.35448	1.4028e-09	4.28491e-07	Ajap1	307086
chr4	153187637	153189750	2114	*	6.88451	7.58403	5.47343	1.90392	1.18059e-08	2.6183e-06	Ajap1	294136
chr4	153217352	153218774	1423	*	7.55628	8.10345	6.66407	1.2345	0.000226948	0.0140706	Ajap1	264767
chr4	153219865	153222049	2185	*	7.17071	7.68003	6.37643	1.0986	0.000607645	0.0329246	Ajap1	261873
chr4	153224539	153225120	582	*	5.00628	5.71545	3.55278	1.94847	2.8493e-06	0.000321336	Ajap1	258000
chr4	153250779	153252000	1222	*	5.78304	6.55492	4.00961	2.33314	1.38151e-08	2.99228e-06	Ajap1	231440
chr4	153257603	153258615	1013	*	5.45355	6.30464	3.10347	2.98045	4.71311e-10	1.63759e-07	Ajap1	224721
chr4	153357232	153359085	1854	*	7.74651	8.67599	4.35683	4.10739	4.62818e-16	2.03126e-12	Ajap1	124671
chr4	153368142	153369096	955	*	5.32824	6.11159	3.48593	2.40913	3.29822e-08	6.38134e-06	Ajap1	114211
chr4	153380814	153381813	1000	*	5.51974	6.38102	3.07242	3.08658	4.79805e-11	2.28631e-08	Ajap1	101516
chr4	153416892	153418289	1398	*	7.46711	8.19513	5.92609	2.06302	3.31308e-09	9.05818e-07	Ajap1	65239
chr4	153469420	153470400	981	*	5.12228	5.72045	4.08194	1.4282	0.000222407	0.013844	Ajap1	12920
chr4	153478287	153479664	1378	*	7.18952	7.78492	6.15776	1.42173	6.12947e-06	0.000631026	Ajap1	3854
chr4	153479978	153484955	4978	*	8.90211	9.50244	7.855	1.44304	1.4227e-06	0.000173955	Ajap1	363
chr4	153650433	153652011	1579	*	5.92452	6.41981	5.16427	1.04921	0.000963704	0.0484402	Ajap1	-168392
chr4	153662120	153663496	1377	*	5.88352	6.4723	4.872	1.39284	4.0729e-05	0.00325633	Ajap1	-179978
chr4	153707861	153709070	1210	*	7.17619	7.68611	6.38039	1.10071	0.000196433	0.0124282	Ajap1	-225636
chr4	153758312	153759414	1103	*	6.21393	6.92919	4.73284	1.9876	3.77005e-08	7.12881e-06	BC039966	191613
chr4	154070761	154072579	1819	*	6.79112	7.39065	5.74654	1.4382	1.79131e-06	0.000212786	Trp73	25503
chr2	154074202	154074629	428	*	4.33987	5.1659	2.20192	2.72886	6.37998e-07	8.55338e-05	Bpifa3	-55920
chr3	154798608	154799495	888	*	5.72376	6.35517	4.57473	1.57185	3.85662e-06	0.000417121	Erich3	87919
chr3	154816589	154818129	1541	*	6.06645	6.67693	4.98705	1.48257	1.35418e-05	0.0012589	Erich3	106226
chr3	154834101	154834886	786	*	5.39497	6.05618	4.13859	1.70693	3.96625e-06	0.000426214	Erich3	123361
chr4	155018611	155019847	1237	*	6.04152	6.53192	5.29289	1.03294	0.000618394	0.0333158	Plch2	199
chr4	155033379	155036008	2630	*	8.49643	9.03203	7.63512	1.1925	0.000108765	0.00753934	Plch2	-15266
chr4	155042512	155044354	1843	*	7.29502	7.82283	6.45404	1.16379	0.000106059	0.00738242	Pex10	-23597
chr4	155360913	155362253	1341	*	7.41572	8.01401	6.37496	1.43385	6.27303e-06	0.000641842	Prkcz	-155
chr4	155368367	155369341	975	*	6.09073	6.58287	5.33798	1.03885	0.000486048	0.0272753	Prkcz	-7426
chr4	155394276	155398585	4310	*	9.03785	9.69959	7.77946	1.71566	4.90394e-08	9.02725e-06	Gabrd	1638
chr2	155763920	155765624	1705	*	8.04676	8.52994	7.31501	1.01045	0.000448022	0.0253805	Mmp24	-10570
chr2	155773649	155776853	3205	*	8.7384	9.26912	7.88987	1.17491	9.60047e-05	0.00677878	Mmp24	-91
chr2	155783874	155785343	1470	*	6.39703	7.20594	4.38612	2.60941	2.81731e-11	1.45921e-08	Mmp24	9267
chr1	156642087	156643657	1571	*	5.84492	5.24067	6.26951	-1.23	0.000373359	0.021546	Tor3a	31467
chr2	156682916	156683729	814	*	5.08486	5.64808	4.14817	1.29044	0.00070923	0.0374791	4930405A21Rik	37586
chr2	157659474	157660431	958	*	5.87394	6.75578	3.20532	3.32994	6.37704e-13	5.74666e-10	Ctnnbl1	-77448
chr2	157662992	157664633	1642	*	5.96056	6.61731	4.72092	1.68794	7.16723e-07	9.4868e-05	Ctnnbl1	-73588
chr2	157695667	157696885	1219	*	6.53176	7.12758	5.49872	1.42259	3.85497e-06	0.000417121	Ctnnbl1	-41125
chr2	157791088	157792181	1094	*	5.97038	6.50994	5.09858	1.20473	0.00010212	0.00715002	Ctnnbl1	54234
chr2	157804253	157805773	1521	*	6.88165	7.41551	6.02492	1.18519	4.27582e-05	0.00340225	Ctnnbl1	67612
chr2	157807390	157809039	1650	*	7.55869	8.22893	6.26766	1.75581	1.25725e-07	2.05571e-05	Ctnnbl1	70814
chr2	157837706	157839251	1546	*	7.58035	8.16428	6.58344	1.37583	1.2849e-05	0.00120524	Vstm2l	-76174
chr2	157844422	157845749	1328	*	5.98004	6.63964	4.7297	1.70154	7.6815e-07	0.000100874	Vstm2l	-69567
chr2	157857208	157858836	1629	*	6.69444	7.30009	5.63054	1.46342	2.51545e-06	0.000289325	Vstm2l	-56631
chr2	157877169	157877891	723	*	4.42472	5.09033	3.1516	1.72163	0.000539495	0.0297933	Vstm2l	-37123
chr2	157887120	157888538	1419	*	7.10184	7.67457	6.13791	1.33126	2.81024e-05	0.00236233	Vstm2l	-26824
chr2	157897010	157897893	884	*	4.93215	5.51382	3.94198	1.36119	0.000496624	0.0277456	Vstm2l	-17201
chr2	157912759	157917122	4364	*	8.91313	9.57563	7.65184	1.71927	5.48869e-08	1.00372e-05	Vstm2l	288
chr2	157921626	157922143	518	*	4.79584	5.59618	2.84396	2.52963	1.36167e-07	2.19629e-05	Vstm2l	7232
chr2	157943264	157944367	1104	*	8.33703	8.93639	7.29298	1.43879	1.64206e-06	0.000197021	Vstm2l	29163
chr2	158555435	158556815	1381	*	6.81269	7.31248	6.04167	1.06554	0.000392583	0.0225773	Arhgap40	43329
chr2	158594454	158596464	2011	*	8.20978	9.02869	6.12612	2.6966	1.30407e-12	1.04562e-09	Gm14204	15264
chr2	158609225	158614870	5646	*	8.94458	9.44822	8.16421	1.07976	0.000404446	0.0231478	Slc32a1	1290
chr1	159499749	159500726	978	*	4.86156	5.68824	2.71849	2.74353	6.08308e-08	1.09797e-05	Tnr	-23531
chr1	159516320	159520093	3774	*	9.68538	10.5417	7.28646	3.05034	9.05488e-15	1.73419e-11	Tnr	-5562
chr1	159523103	159525487	2385	*	8.20556	9.12272	5.04193	3.87203	1.50228e-16	1.13885e-12	Tnr	526
chr1	159532695	159533594	900	*	5.35484	6.15645	3.39439	2.54454	4.30736e-09	1.14028e-06	Tnr	9376
chr1	159535335	159538376	3042	*	6.92831	7.76886	4.67169	2.88738	1.42076e-11	7.92102e-09	Tnr	13087
chr1	159556563	159557194	632	*	4.2064	5.04592	1.95855	2.8458	7.44468e-07	9.82285e-05	Tnr	33110
chr1	159595612	159596339	728	*	4.35616	5.00326	3.15188	1.6346	0.000418362	0.0237972	Tnr	72207
chr1	159613849	159616303	2455	*	7.11777	7.99234	4.53163	3.25022	1.47423e-14	2.31951e-11	Tnr	91307
chr1	159656323	159659355	3033	*	8.42737	9.01021	7.43371	1.37197	7.08815e-06	0.000715585	Tnr	134070
chr1	159660265	159661554	1290	*	6.1849	6.79525	5.10595	1.48222	1.42227e-05	0.00131052	Tnr	137141
chr1	159669989	159671606	1618	*	7.25107	7.75341	6.47385	1.07463	0.000231259	0.0142594	Tnr	147029
chr1	159677655	159679161	1507	*	6.02884	6.54258	5.22356	1.11266	0.000477652	0.0268403	Tnr	154639
chr1	159681306	159682104	799	*	5.18667	5.98347	3.25846	2.50681	2.80007e-08	5.53305e-06	Tnr	157936
chr1	159685840	159687144	1305	*	6.62312	7.12969	5.83559	1.08861	0.000487386	0.027332	Tnr	162723
chr1	159773148	159774367	1220	*	5.62745	6.45281	3.49471	2.74114	1.92965e-09	5.58722e-07	Tnr	249989
chr2	163433955	163434590	636	*	4.45143	5.1706	2.95226	1.9978	8.54396e-05	0.0061473	Gdap1l1	-4194
chr2	163437643	163441108	3466	*	9.20551	9.99256	7.34018	2.4476	6.47354e-11	2.94985e-08	Gdap1l1	900
chr2	163457744	163460028	2285	*	7.34739	8.05136	5.91695	1.92844	1.20597e-08	2.6675e-06	2310001K24Rik	-13659
chrX	163879127	163880280	1154	*	6.16761	5.67285	6.53534	-1.06458	0.000610729	0.0330465	Ap1s2	-29313
chr1	164224351	164225184	834	*	5.1435	4.47159	5.60012	-1.32746	0.000708214	0.0374591	Mir12178	7090
chr2	164947266	164951264	3999	*	7.47542	8.05425	6.49366	1.35552	9.54658e-06	0.000928915	Mmp9	1046
chr2	164960232	164962548	2317	*	8.45266	9.10483	7.22993	1.67019	9.76832e-07	0.000124172	Slc12a5	544
chr2	164967327	164971594	4268	*	7.95158	8.64563	6.56388	1.87652	3.18335e-08	6.21678e-06	Slc12a5	1473
chr2	165054913	165057178	2266	*	7.90639	8.49994	6.88028	1.41484	1.27624e-05	0.00119847	Cd40	410
chr2	165136127	165136750	624	*	4.73772	5.47041	3.17394	2.07753	2.40694e-05	0.00207992	1700025C18Rik	-45689
chr2	165166556	165167830	1275	*	5.90909	6.68625	4.10441	2.37009	6.81248e-09	1.67084e-06	Cdh22	67544
chrX	165327414	165328160	747	*	5.10494	5.83637	3.54735	2.07404	8.0069e-07	0.000104326	Glra2	80
chr2	165688509	165689849	1341	*	6.57995	7.07948	5.80952	1.06442	0.000406149	0.0232293	Eya2	33881
chr1	166996145	166997733	1589	*	6.57089	7.15967	5.55939	1.39417	1.99537e-05	0.00176364	Gm16701	2791
chr1	167010040	167014590	4551	*	9.72181	10.2473	8.88687	1.15626	2.0301e-05	0.00178952	Fam78b	10898
chr1	167069966	167071539	1574	*	5.75245	6.24943	4.98815	1.05457	0.000801354	0.0416609	Fam78b	69336
chr2	167092892	167094650	1759	*	6.6383	7.14721	5.84499	1.09672	0.000330155	0.0194019	Snord12	28478
chr1	167094658	167095638	981	*	5.52334	6.11907	4.49052	1.41997	6.66906e-05	0.00494774	Fam78b	93731
chr2	167112046	167113733	1688	*	6.70498	7.22659	5.87987	1.14123	0.00018677	0.0119071	Snord12	47597
chr2	167119426	167121574	2149	*	8.08765	8.8379	6.4344	2.19805	5.27895e-10	1.80412e-07	Snord12	55207
chr2	167122050	167124911	2862	*	7.19589	7.85946	5.93055	1.72308	2.79179e-07	4.12281e-05	Snord12	58188
chr2	167128493	167130825	2333	*	7.68278	8.19373	6.88445	1.10458	0.000282915	0.0169483	Kcnb1	59159
chr2	167147908	167148342	435	*	4.54886	5.23303	3.20232	1.81359	5.87344e-05	0.00444447	Kcnb1	40693
chr2	167155337	167156970	1634	*	6.16398	6.9136	4.51403	2.18997	9.82127e-10	3.16211e-07	Kcnb1	32664
chr2	167162081	167163899	1819	*	6.86905	7.45501	5.86605	1.38322	4.04716e-06	0.00043379	Kcnb1	25828
chr2	167167215	167169119	1905	*	7.8616	8.44025	6.88035	1.3551	8.03219e-06	0.000798327	Kcnb1	20651
chr2	167172628	167174201	1574	*	7.70998	8.46918	6.00839	2.25479	2.59601e-10	9.57872e-08	Kcnb1	15403
chr2	167175188	167176317	1130	*	5.00731	5.5984	3.98878	1.39912	0.000231361	0.0142594	Kcnb1	13065
chr2	167177879	167179186	1308	*	5.66023	6.29489	4.49995	1.58603	3.95934e-06	0.000426039	Kcnb1	10285
chr1	167182111	167182778	668	*	5.0343	5.62003	4.03202	1.37775	0.000334842	0.019622	Uck2	102682
chr2	167184268	167185138	871	*	5.16818	6.05619	2.4253	3.39844	9.41129e-11	4.04535e-08	Kcnb1	4115
chr2	167186695	167191620	4926	*	9.69307	10.3273	8.53444	1.58858	7.24644e-08	1.26682e-05	Kcnb1	-340
chrX	167318967	167319407	441	*	4.09776	3.12896	4.67216	-1.73255	0.000643105	0.0345318	Tlr7	11384
chr2	172256430	172257465	1036	*	4.93434	5.53949	3.87203	1.4564	0.000229143	0.0141856	Mc3r	8456
chr2	172281619	172283020	1402	*	6.99002	7.57417	5.99246	1.37616	7.87194e-06	0.000786147	Mc3r	33828
chr2	172283309	172283790	482	*	4.77959	5.38745	3.70864	1.4668	0.000568366	0.0312017	Mc3r	35058
chr2	172311405	172312974	1570	*	6.37401	6.9977	5.25116	1.53968	1.40064e-06	0.00017151	Fam210b	-33387
chr1	172455774	172456549	776	*	5.6959	5.18222	6.07393	-1.09282	0.0004727	0.0266698	Slamf9	-19198
chr1	175359767	175360756	990	*	6.49295	6.99104	5.72599	1.05946	0.000194145	0.012312	Rgs7	132283
chr1	175491218	175493708	2491	*	9.11599	9.62969	8.3108	1.11467	0.000119197	0.00809424	Rgs7	82
chr1	176698325	176700011	1687	*	5.97812	6.6936	4.49605	1.98793	3.29615e-08	6.38134e-06	Mir350	73255
chr1	177309437	177310744	1308	*	5.43772	6.15393	3.95229	1.98937	2.72496e-07	4.05771e-05	Akt3	-61324
chr1	177334351	177334974	624	*	4.72747	5.44303	3.245	1.98117	1.23428e-05	0.00116828	Akt3	-85896
chr2	178320953	178321675	723	*	5.54284	6.3101	3.79606	2.30055	2.36723e-08	4.76814e-06	Sycp2	86344
chr2	178326965	178328628	1664	*	6.57537	7.26255	5.21643	1.83892	2.28235e-07	3.45414e-05	Sycp2	79861
chr2	178680108	178680945	838	*	5.76544	6.33123	4.82146	1.30229	0.000151812	0.00996808	Cdh26	250012
chr2	178690570	178692282	1713	*	5.98513	6.53563	5.08385	1.24501	0.000108677	0.00753934	Cdh26	260911
chr2	178698225	178699596	1372	*	6.24825	6.76281	5.44093	1.11591	0.00020754	0.0130418	Cdh26	268396
chr2	178701212	178702350	1139	*	5.34619	5.92733	4.3576	1.36077	0.000158931	0.010354	Cdh26	271266
chr2	178710565	178711482	918	*	5.40224	6.14402	3.79299	2.13768	1.44158e-07	2.29851e-05	Cdh26	280509
chr2	178744791	178745788	998	*	5.48516	6.1676	4.14562	1.81103	1.47785e-06	0.000179907	Cdh26	314775
chr2	178865711	178867413	1703	*	6.40906	7.1321	4.89178	2.03205	6.92408e-09	1.68336e-06	Cdh26	436047
chr2	179059957	179061526	1570	*	6.3766	6.89758	5.5531	1.13854	0.000210795	0.0132165	4930591A17Rik	-354194
chr2	179370840	179372190	1351	*	6.49713	7.13348	5.33097	1.5958	4.7321e-07	6.5658e-05	4930591A17Rik	-43421
chr2	179480586	179481362	777	*	5.2272	5.85631	4.08601	1.55993	3.8244e-05	0.00308427	Cdh4	38543
chr2	179591726	179592393	668	*	4.83897	5.54861	3.38335	1.94932	6.53959e-06	0.000664226	Cdh4	149629
chr2	179598888	179600284	1397	*	5.55136	6.13052	4.56862	1.35357	5.62581e-05	0.00428039	Cdh4	157155
chr2	179640722	179641260	539	*	5.06706	5.67146	4.0071	1.45407	0.000222837	0.013857	Cdh4	198560
chr2	179650914	179653052	2139	*	7.08734	7.5954	6.29611	1.09421	0.000252091	0.0152663	Cdh4	209552
chr2	179697189	179698904	1716	*	6.29123	6.82944	5.42302	1.20024	4.67418e-05	0.0036633	Cdh4	255616
chr2	180097002	180098249	1248	*	5.37764	5.90561	4.53624	1.16128	0.000815042	0.0422934	Hrh3	6781
chr2	180102823	180106175	3353	*	9.58019	10.0916	8.7806	1.1069	4.84811e-05	0.00378184	Hrh3	-92
chr2	180384878	180387285	2408	*	7.03852	7.59003	6.13448	1.25024	2.04076e-05	0.00179453	B230312C02Rik	-197
chr2	180417396	180419143	1748	*	7.12834	7.88729	5.42815	2.25213	2.0634e-10	7.82113e-08	Mir133a-2	19891
chr2	180426447	180427674	1228	*	5.25807	5.85607	4.21825	1.4281	0.000136103	0.00907232	Mir133a-2	28682
chr2	180499299	180500648	1350	*	6.3713	6.89496	5.54099	1.14807	9.95291e-05	0.00700124	Ntsr1	-2
chr2	180788072	180788679	608	*	5.16915	5.77267	4.112	1.45049	0.00010109	0.0070913	Bhlhe23	-11476
chr2	180813811	180815025	1215	*	6.79777	7.56221	5.067	2.28732	7.29825e-11	3.26656e-08	Bhlhe23	-37518
chr2	180821914	180823252	1339	*	7.03083	7.57807	6.13842	1.23435	2.51134e-05	0.00215672	Bhlhe23	-45683
chr2	180834414	180835259	846	*	4.76726	5.49761	3.21489	2.06495	7.76816e-06	0.000777411	Bhlhe23	-57937
chr2	180854516	180855515	1000	*	5.43742	6.07919	4.25221	1.6172	8.09655e-06	0.000803765	Mir124a-3	-39024
chr2	181134200	181135596	1397	*	6.36283	7.11921	4.67669	2.23343	2.40494e-09	6.82127e-07	Kcnq2	391
chr2	181139678	181140649	972	*	5.08109	5.7852	3.65001	1.92152	7.31567e-06	0.000736771	Kcnq2	-4875
chr2	181155601	181158811	3211	*	7.09338	7.74935	5.8566	1.68681	4.62837e-07	6.44351e-05	Eef1a2	-191
chr2	181312921	181315101	2181	*	8.02255	8.82395	6.06356	2.5544	9.7114e-11	4.13175e-08	Stmn3	489
chr1	192277340	192278822	1483	*	7.07352	7.5574	6.34014	1.01227	0.000788676	0.04113	Kcnh1	87304
chr1	192415994	192416631	638	*	4.71784	5.49285	2.926	2.34521	3.66831e-06	0.000398822	Kcnh1	225536
chr1	192443504	192446672	3169	*	7.83572	8.5122	6.52013	1.78683	3.69468e-08	7.00217e-06	Kcnh1	254311
chr1	192449460	192451167	1708	*	6.34352	7.05545	4.87757	1.96967	1.06653e-08	2.39723e-06	Kcnh1	259537
chr1	193034303	193037335	3033	*	8.79091	9.36928	7.81049	1.35439	2.23353e-05	0.00194215	Syt14	-44

## Sheet: list diff accessible peaks mf 
List of differentially accessible peaks between WT and REST-cKO myofibers from the ATAC-Seq of single myofibers (only significant: absolute log2FC >1, p-adj<0.05)
chromosome	start	end	width	strand	Conc	Conc_KO	Conc_WT	Fold	p.value	FDR	Gene_Symbol	Distance_to_TSS_bp
chrUn_JH584304	4566	8099	3534	*	8.81305	9.76958	4.73905	4.24366	8.42745e-05	0.0371745	Pisd-ps3	53356
chrUn_JH584304	8319	11374	3056	*	8.65212	9.61078	4.50645	4.31607	6.53433e-05	0.0319921	Pisd-ps3	49842
chrUn_JH584304	12324	15021	2698	*	7.97597	8.97209	0.436736	7.63384	1.56319e-08	0.000142506	Pisd-ps3	46016
chrUn_JH584304	15177	18362	3186	*	8.46717	9.45652	2.38092	6.26055	3.65163e-07	0.000907895	Pisd-ps3	42919
chrUn_GL456370	26304	26598	295	*	6.42704	7.38569	2.28159	4.29909	5.78089e-05	0.0306833		NA
chrUn_GL456383	34347	34791	445	*	6.13119	7.10429	1.37229	4.90569	3.2723e-05	0.0210836		NA
chrUn_JH584304	51456	52119	664	*	5.92762	6.90963	0.593019	5.42326	6.24146e-05	0.0316107	Pisd-ps3	7901
chrUn_JH584304	52572	55926	3355	*	8.61444	9.59314	3.52211	5.27652	3.92282e-06	0.0048766	Pisd-ps3	5440
chrUn_JH584304	72888	73417	530	*	9.14234	10.1279	3.49327	5.84141	1.86781e-06	0.00319267	Pisd-ps3	-13464
chrUn_JH584304	103418	104051	634	*	7.23959	8.21644	2.26638	5.1402	3.57331e-06	0.00465363	Pisd-ps3	-44046
chrUn_JH584304	112987	113464	478	*	8.58832	9.55571	4.1046	4.661	2.00175e-05	0.0156417	Pisd-ps3	-53537
chr17	8372284	8373076	793	*	5.64594	6.64594	0	9.30945	1.80923e-06	0.00319267	T2	284
chrX	13292444	13292818	375	*	5.50922	2.53302	6.41451	-4.62889	5.61027e-05	0.0306833	Ddx3x	11609
chr12	16683621	16684043	423	*	5.64867	6.64867	0	9.31218	2.22204e-06	0.00337614	Ntsr2	30362
chr7	19088617	19089264	648	*	5.82901	6.80631	0.82784	5.13126	5.87474e-05	0.0306833	Mir3100	2113
chr7	23357325	23358566	1242	*	8.46931	5.51748	9.37293	-4.63303	3.31491e-05	0.0210836	Nlrp5	-27943
chr18	25606421	25607170	750	*	5.37253	6.36419	0	6.40662	7.69125e-05	0.0362669	Celf4	72952
chr7	29090921	29091368	448	*	5.79363	3.41205	6.64811	-3.99922	9.20152e-05	0.0387158	Mir1963	-7451
chr14	30202727	30203013	287	*	8.33818	5.81385	9.20701	-4.17166	9.7413e-05	0.0403659	Cacna1d	150616
chr14	32317739	32318453	715	*	5.01629	6.01629	0	8.68103	0.000102484	0.0412471	Ogdhl	-3923
chr17	34398680	34399271	592	*	6.70435	7.66501	2.48826	4.37471	2.93226e-05	0.0201025	BC051142	156
chr7	45903001	45903373	373	*	6.10343	3.68977	6.96127	-4.03694	0.000102556	0.0412471	Tmem143	6118
chr4	45965219	45965516	298	*	6.59183	4.26655	7.4402	-3.94496	5.94615e-05	0.0306833	Tdrd7	33
chr17	46801032	46801662	631	*	4.90814	0	5.90814	-9.35389	1.41622e-06	0.00276659	Rpl7l1	-18691
chr3	52401014	52401923	910	*	5.68305	6.68305	0	9.3465	1.35301e-06	0.00276659	Gm30173	-115495
chr7	56135024	56135685	662	*	6.19453	3.58693	7.07104	-4.24905	3.28226e-05	0.0210836	Herc2	84966
chr7	59311236	59311608	373	*	7.61323	4.65833	8.51707	-4.63256	6.01927e-06	0.00685921	Gm22496	36002
chr14	60668082	60668357	276	*	5.81862	1.78483	6.77389	-5.70417	5.3631e-06	0.0063772	Spata13	33515
chr10	60913112	60914064	953	*	6.6064	7.6064	0	10.2688	5.34436e-09	7.30814e-05	Mir6408	-9435
chr1	66467471	66468783	1313	*	7.15731	8.13991	1.77528	5.54858	8.04461e-07	0.00183343	Unc80	193
chr18	70561937	70562171	235	*	8.57585	5.72636	9.47213	-4.524	5.91157e-05	0.0306833	Mbd2	-6238
chr8	71668098	71669029	932	*	7.14374	8.13891	0	7.30953	2.27825e-08	0.00015577	Unc13a	3193
chr9	75683535	75684247	713	*	6.64114	7.64114	0	10.3035	4.55495e-09	7.30814e-05	Scg3	165
chr15	76468253	76468544	292	*	5.24596	6.24596	0	8.91021	4.32442e-05	0.0262819	Bop1	8850
chr14	80253984	80254322	339	*	5.24966	6.24966	0	8.91389	2.93538e-05	0.0201025	Olfm4	253851
chr4	87229694	87230500	807	*	5.89763	6.87929	0.590768	5.39508	6.55072e-05	0.0319921	Slc24a2	443
chr6	90666780	90667284	505	*	5.53634	6.5263	0	6.14811	8.95969e-05	0.0384698	Slc41a3	47786
chr1	91238884	91239585	702	*	5.74336	6.72494	0.442481	5.41456	4.90144e-05	0.0289833	Ube2f	-11069
chr16	94997200	94998027	828	*	6.68218	7.66365	1.39039	5.44675	2.00387e-06	0.00322375	Kcnj6	82
chrX	99344335	99345191	857	*	7.1923	4.11077	8.10446	-4.76331	3.09003e-06	0.00422546	Gm14812	99034
chr15	100419292	100419938	647	*	5.99575	6.9708	1.1302	5.00593	3.71606e-05	0.0230978	Slc11a2	3440
chr12	102550733	102552004	1272	*	6.15246	7.13749	0.554175	5.6878	1.60799e-05	0.0139613	Chga	-3572
chr11	104052485	104053096	612	*	5.06631	6.06631	0	8.73094	8.20921e-05	0.0368055	Crhr1	-79990
chr13	105234316	105234648	333	*	7.51149	4.94554	8.38422	-4.21398	2.41592e-05	0.0178576	Rnf180	58532
chr5	110545952	110546869	918	*	6.14659	7.13152	0.557685	5.67849	1.74585e-05	0.0140433	Galnt9	2056
chr5	110582176	110583248	1073	*	6.16199	7.14716	0.550302	5.70115	1.45428e-05	0.0132577	Galnt9	-20793
chr4	114552768	114553129	362	*	7.35973	4.81442	8.23055	-4.19076	2.4044e-05	0.0178576	Trabd2b	146225
chr5	115731873	115733058	1186	*	7.72502	8.69104	3.30038	4.59503	1.35203e-05	0.0127505	Bicdl1	-845
chr11	118667659	118668868	1210	*	6.11047	7.11047	0	9.77335	7.72184e-08	0.000268519	Rbfox3	92777
chr5	121076756	121077292	537	*	6.14522	7.14522	0	9.80807	6.1731e-08	0.000268519	Rph3a	-66932
chr8	121765344	121766173	830	*	6.5101	7.50263	0	6.68003	2.8306e-07	0.00077414	Jph3	35200
chr9	123689803	123690143	341	*	6.18908	3.2644	7.09081	-4.58576	1.04191e-05	0.0105537	Slc6a20a	-11141
chr10	125092276	125092627	352	*	7.65152	5.39058	8.49257	-3.87935	7.86032e-05	0.0364359	Slc16a7	216364
chr2	136713327	136714589	1263	*	7.77262	8.72295	3.88759	4.04266	0.00010602	0.0420223	Snap25	272
chr2	136753345	136754071	727	*	5.46118	6.46118	0	9.125	6.6866e-06	0.00731487	Snap25	40022
chr4	137681632	137682040	409	*	5.92506	6.90697	0.598565	5.41534	6.89376e-05	0.0330767	Rap1gap	209
chr7	138397968	138398783	816	*	6.26017	7.26017	0	9.92289	2.89762e-08	0.000158494	Tcerg1l	-646
chr7	141960443	141962373	1931	*	8.17711	9.15441	3.17632	5.18083	2.807e-06	0.00404046	Brsk2	11657
chr1	144677278	144677944	667	*	8.1869	5.81754	9.04007	-4.00104	0.000118127	0.0461523	Rgs18	97816
chrX	144774219	144774521	303	*	5.83449	2.65987	6.7523	-4.84152	1.16124e-05	0.0113424	Rtl4	85463
chr3	145333801	145334432	632	*	5.08415	6.08415	0	8.74875	9.00239e-05	0.0384698	Col24a1	41645
chr4	148293364	148294675	1312	*	6.14839	7.13338	0.554344	5.68353	1.63356e-05	0.0139613	Disp3	-6055
chr4	148297035	148298548	1514	*	7.82474	8.81688	1.30043	6.67365	7.8546e-08	0.000268519	Disp3	-9827
chr4	155281871	155282282	412	*	5.22427	6.22427	0	8.88857	4.98086e-05	0.0289833	Faap20	32111
chr4	155461402	155461967	566	*	5.4754	6.4754	0	9.1392	7.30089e-06	0.00767969	Tmem52	-7429
chr4	156029878	156030142	265	*	7.08809	4.4724	7.96533	-4.26552	1.74121e-05	0.0140433	Tnfrsf18	3688
chr2	156650523	156652394	1872	*	8.12602	9.07854	4.17713	4.1112	8.11441e-05	0.0368055	Dlgap4	37762
chr2	158375371	158376430	1060	*	6.67951	7.67285	0	6.84775	1.28023e-07	0.000389034	Snhg11	263
chr2	167641296	167641972	677	*	5.1613	6.1613	0	8.82572	5.1238e-05	0.0291939	Ube2v1	-9629
chr2	169412405	169412927	523	*	5.85665	3.11434	6.7446	-4.38672	2.94014e-05	0.0201025	Tshz2	-219843
